# Supplementary material
Source: publisher figshare collection journal article supplement (https://geolsoc.figshare.com/ndownloader/files/11094932)
Supplement: Supplementary file 1 [file 11094932]

## Sheet: ppm
																																					chond (ppm); McDonough + Sun 1995:	0.613	0.457	0.148	0.0563	0.199	0.246	0.16	0.161	0.0246	0.103
																								NIST612		av rat	0.00127905	1	-0.000176299	0.00944548	0.0269289	0.000695871	0.000886719	0.00126281	0.0113855	0.0407814	0.0144253	0.0290983	0.0123869	0.0114181	0.0403532	0.0065236	0.0106305	0.0156685	0.0106773	0.0958778	0.029959	0.0190791	0.043938
	Isotope ratios to Si																									conc	0.0106579	71.9	0.011687	0.00798652	11.9	0.00733946	36	0.00656106	31.4	78.4	38	38.7	35.9	38.1	35	36.7	36	38	39.2	36.9	35	38.57	37.79
	Mg25	Si29	P31	K39	Ca43	Ti49	Cr53	Fe57	Rb85	Sr88	Zr90	Ce140	Nd146	Sm147	Eu153	Gd157	Dy163	Er166	Yb172	Lu175	Hf178	Pb208	Th232	U238		Concentrations	Mg25	Si29	P31	K39	Ca43	Ti49	Cr53	Fe57	Rb85	Sr88	Zr90	Ce140	Nd146	Sm147	Eu153	Gd157	Dy163	Er166	Yb172	Lu175	Hf178	Pb208	Th232
JP1	0.747313	1	0.185084	4.91271	0.0121527	0.0132897	-0.00167176	0.83557	0.0285663	0.353278	0.0379609	0.0226842	0.00255549	0.00736252	-0.000669832	0.00132841	0.0104865	0.0103571	0.0119444	0.0116461	0.0193294	0.180889	0.0194701	0.0256788	1		3.20447	37	-6.31389	2.13761	2.76359	0.0721311	-34.9272	2.23404	40.5419	349.497	51.4599	15.5253	3.81137	12.6425	-0.29897	3.84576	18.2748	12.9261	22.5663	2.30654	11.6207	188.182	8.61744
JP1	0.535045	1	0.00543182	1.43345	0.0145266	0.00517905	0.000356969	0.106366	0.0119372	0.0218071	0.0517323	0.00975852	0.00252732	0.000621925	5.13793e-05	0.000535957	0.00126501	0.00116594	0.00107796	0.00160821	0.00389341	0.0200226	0.00399315	0.001806	2		2.29427	37	-0.185299	0.62372	3.30344	0.0281098	7.45794	0.284388	16.9415	21.5737	70.1285	6.67882	3.76936	1.06793	0.0229325	1.5516	2.20452	1.45515	2.03657	0.31851	2.34069	20.8299	1.76736
JP1	0.529343	1	0.00368098	1.43968	0.014707	0.00433837	0.000581228	0.101784	0.0181988	0.0212736	0.0332218	0.00982639	0.00218011	0.000504528	0.000385918	0.000397067	0.00163864	0.00211089	0.00138114	0.0022509	0.00250733	0.0121421	0.00335176	0.00127045	3		2.26982	37	-0.125571	0.626429	3.34446	0.0235469	12.1433	0.272138	25.8281	21.0459	45.0357	6.72527	3.25151	0.866344	0.172249	1.14952	2.85565	2.63449	2.60936	0.445797	1.50739	12.6317	1.48348
JP1	0.552585	1	0.00133295	1.44685	0.0136546	0.00307547	0.000235094	0.128776	0.0131772	0.019533	0.030086	0.00841332	0.00171125	0.000529269	0.000228271	0.000333007	0.00189268	0.00191076	0.00204968	0.00251965	0.00173012	0.00745072	0.0023246	0.000765452	4		2.36948	37	-0.0454719	0.629549	3.10512	0.0166924	4.91168	0.344305	18.7013	19.3239	40.7848	5.75815	2.55223	0.908828	0.101886	0.964062	3.29837	2.38471	3.87242	0.499024	1.04014	7.75111	1.02886
JP1	0.602833	1	0.00135367	1.48896	0.014059	0.00288982	0.000618612	0.168717	0.0137748	0.0192183	0.028533	0.00768459	0.00157898	0.000444501	0.000199139	0.000531629	0.0027367	0.0037693	0.00211551	0.00300774	0.00161266	0.00656875	0.00176942	0.00109851	5		2.58494	37	-0.0461787	0.64787	3.19709	0.0156848	12.9243	0.451095	19.5495	19.0127	38.6794	5.2594	2.35495	0.76327	0.0888831	1.53908	4.76923	4.70426	3.99679	0.595691	0.969521	6.83358	0.783142
JP1	0.650573	1	0.0018706	1.61201	0.0129618	0.00274692	0.000531368	0.2372	0.0140259	0.021739	0.0291042	0.00882469	0.00179963	0.000735963	0.000164397	0.00109818	0.00415973	0.00455403	0.0035051	0.00442977	0.00167853	0.00555843	0.00209306	0.000683756	6		2.78965	37	-0.0638131	0.701414	2.94758	0.0149092	11.1016	0.634195	19.9059	21.5063	39.4538	6.0397	2.68404	1.26375	0.0733765	3.17924	7.24914	5.68364	6.62213	0.877328	1.00912	5.78253	0.926382
JP1	0.731872	1	0.00209732	1.7239	0.0126969	0.00306737	0.00112646	0.336086	0.0139282	0.0213283	0.0292487	0.00662896	0.00136503	0.000586562	0.000131205	0.00116029	0.00539617	0.00615911	0.00489168	0.00598062	0.0011906	0.0046541	0.00160893	0.000690021	7		3.13826	37	-0.0715473	0.7501	2.88736	0.0166485	23.5345	0.898584	19.7672	21.1001	39.6497	4.53692	2.03587	1.00721	0.0585614	3.35905	9.40387	7.68685	9.24177	1.18448	0.715782	4.84174	0.712108
JP1	0.76788	1	0.000563548	1.68563	0.011306	0.00299956	0.000980432	0.452894	0.0150334	0.0209061	0.0252988	0.00539058	0.00184231	0.000959073	0.000184127	0.00167284	0.00708778	0.00841687	0.0063544	0.00841036	0.00126362	0.00404757	0.00105377	0.000650284	8		3.29266	37	-0.0192247	0.733446	2.57104	0.0162804	20.4836	1.21089	21.3356	20.6823	34.2951	3.68936	2.7477	1.64686	0.0821825	4.84289	12.3518	10.5046	12.0053	1.6657	0.759677	4.21075	0.466397
JP1	0.84915	1	0.00119792	1.71736	0.00940319	0.00286015	0.00186252	0.657849	0.0157636	0.0204601	0.0262165	0.00526417	0.00134383	0.00127718	0.00012962	0.00288712	0.0116587	0.0127307	0.0085066	0.0114144	0.00150592	0.00361579	0.00111192	0.000530645	9		3.64115	37	-0.0408655	0.747253	2.13834	0.0155238	38.9126	1.75887	22.372	20.2412	35.5393	3.60285	2.00425	2.1931	0.0578542	8.35827	20.3175	15.8885	16.0714	2.26066	0.905351	3.76157	0.492134
JP1	0.977549	1	0.00299773	1.72151	0.00965568	0.0037133	0.00246928	0.989104	0.0142723	0.0189319	0.022506	0.00350304	0.00198416	0.0015625	0.000440051	0.00369065	0.0135593	0.0158199	0.0114287	0.0141581	0.0010528	0.00250115	0.00086926	0.000179928	10		4.19172	37	-0.102263	0.749061	2.19576	0.0201543	51.5894	2.64454	20.2556	18.7293	30.5093	2.39751	2.95926	2.68302	0.196411	10.6845	23.6297	19.744	21.5921	2.80404	0.632937	2.60199	0.384732
JP1	1.11461	1	0.00143597	1.58186	0.0079147	0.00441693	0.0030287	1.3574	0.0131816	0.0173402	0.0217487	0.00260077	0.00205056	0.00284297	0.00028977	0.00448201	0.0185922	0.0214454	0.0145523	0.0181497	0.00110984	0.00157961	0.000203541	0.000265817	11		4.77945	37	-0.0489862	0.688293	1.79985	0.0239733	63.2769	3.62925	18.7076	17.1547	29.4826	1.77999	3.05829	4.88176	0.129335	12.9755	32.4006	26.7648	27.4934	3.5946	0.667227	1.6433	0.0900867
JP1	1.19119	1	0.00029272	1.15127	0.00669845	0.00428469	0.00374676	1.66626	0.00950858	0.0137422	0.021322	0.00223688	0.00248845	0.00287735	0.00040244	0.00486637	0.0221923	0.024374	0.0151597	0.0180007	0.000852933	0.00118907	0.000407387	0.000120838	12		5.10783	37	-0.00998575	0.500938	1.52327	0.0232556	78.2789	4.45503	13.4948	13.5951	28.9042	1.53094	3.71138	4.9408	0.179624	14.0882	38.6743	30.4199	28.6409	3.56509	0.512778	1.237	0.180308
JP1	1.18264	1	0.00224479	0.792101	0.00635286	0.00411406	0.00352251	1.80919	0.00690678	0.00793763	0.0179641	0.00105781	0.00205035	0.00258728	0.000184939	0.00505056	0.0215657	0.0226627	0.0143015	0.0184157	0.000619236	0.000668862	0.000123578	0.000125412	13		5.07116	37	-0.076578	0.344657	1.44468	0.0223295	73.5939	4.83718	9.80223	7.85268	24.3522	0.723974	3.05797	4.44272	0.0825452	14.6215	37.5824	28.284	27.0195	3.64728	0.37228	0.695829	0.0546954
JP1	1.13334	1	0.00249996	0.526773	0.00542605	0.00521906	0.00406722	1.86782	0.00425676	0.00455397	0.0157519	0.00101934	0.00194066	0.00293796	0.000382465	0.00512405	0.022583	0.0208562	0.0134003	0.0179576	0.000880704	0.000466985	0.000189104	9.16944e-05	14		4.85974	37	-0.0852827	0.229208	1.23391	0.028327	84.9741	4.99395	6.04127	4.50523	21.3534	0.697645	2.89438	5.04487	0.170708	14.8342	39.3553	26.0295	25.317	3.55656	0.529473	0.485812	0.0836972
JP1	1.19309	1	0.000104863	0.309095	0.00596027	0.00500262	0.00416263	2.07471	0.00303563	0.00296743	0.0157484	0.00060315	0.00225702	0.00293917	0.000256022	0.00554928	0.0227056	0.0218543	0.0138504	0.0181078	0.000732095	0.000240961	0.000193541	5.99914e-05	15		5.11594	37	-0.00357726	0.134492	1.3554	0.0271523	86.9676	5.5471	4.30823	2.93567	21.3486	0.412801	3.36622	5.04696	0.114272	16.0653	39.5689	27.2752	26.1674	3.58629	0.440131	0.250676	0.0856607
JP1	0.76519	1	0.000623667	0.113184	0.00309122	0.00318598	0.00199294	1.32974	0.00130941	0.00093006	0.00829703	0.000375191	0.00136925	0.00199037	0.000110915	0.00368742	0.012374	0.0131318	0.00819768	0.0100665	0.00027168	0.000121985	5.41747e-05	1.53947e-05	16		3.28113	37	-0.0212755	0.0492481	0.702961	0.0172923	41.6375	3.55529	1.85834	0.920106	11.2475	0.256784	2.04215	3.41773	0.0495055	10.6752	21.5641	16.3891	15.4877	1.99371	0.163332	0.126903	0.0239776
JP1	1.27939	1	0.00147332	0.104483	0.00447984	0.00564835	0.00253915	2.14306	0.000878642	0.000751103	0.011151	0.000534216	0.00246771	0.00307574	0.000430853	0.00562064	0.0197781	0.0209537	0.0121059	0.0149887	0.000528143	0.000194345	2.27748e-05	-7.24123e-06	17		5.48601	37	-0.0502603	0.0454621	1.01874	0.030657	53.0491	5.72985	1.24698	0.743064	15.1164	0.365622	3.68044	5.28146	0.192306	16.2718	34.4672	26.1511	22.8714	2.96855	0.317516	0.202181	0.0100801
JP1	1.2741	1	0.0013433	0.0651364	0.00567853	0.00484487	0.00323313	2.14438	0.000433145	0.000527819	0.0116399	0.000438159	0.00227288	0.00275333	0.000239833	0.00532525	0.0210793	0.0189467	0.0120851	0.0142012	0.000305242	3.54445e-05	2.27358e-05	2.44847e-05	18		5.46334	37	-0.0458249	0.028342	1.29133	0.026296	67.5479	5.73337	0.614728	0.522171	15.7791	0.29988	3.38986	4.72784	0.107046	15.4167	36.7347	23.6464	22.8322	2.81258	0.18351	0.0368735	0.0100628
JP1	1.22985	1	0.00192439	0.0355636	0.00563906	0.00508513	0.00242234	2.05021	0.000504848	0.00035287	0.00951546	0.000267187	0.00180836	0.00278271	0.000441338	0.00481624	0.01902	0.0165269	0.0117008	0.0129644	0.00038262	3.56547e-06	-8.57941e-06	-6.9081e-06	19		5.27357	37	-0.0656478	0.0154743	1.28235	0.0276001	50.6086	5.4816	0.71649	0.349094	12.8992	0.182865	2.69707	4.77829	0.196985	13.9431	33.1461	20.6263	22.1061	2.56764	0.230028	0.00370922	-0.00379723
JP1	1.24524	1	-0.000512717	0.0244898	0.00602663	0.00436017	0.00334175	2.09385	0.000200541	0.000290458	0.00855209	0.000386023	0.00170687	0.0026451	0.000438622	0.00415377	0.0188424	0.0182965	0.0118098	0.0136683	0.000229665	-2.65764e-05	-8.52661e-06	2.32544e-05	20		5.33959	37	0.0174906	0.0106559	1.37049	0.0236653	69.8174	5.59828	0.284612	0.28735	11.5932	0.264197	2.5457	4.542	0.195773	12.0253	32.8366	22.8349	22.312	2.70705	0.138073	-0.0276479	-0.00377386
JP1	1.3042	1	0.00111478	0.0123785	0.00631743	0.00428609	0.00236573	2.23545	8.39248e-05	0.000146607	0.00887003	0.00021521	0.00175766	0.002457	0.000522934	0.00479623	0.0179478	0.0182303	0.0103877	0.012843	0.000398614	0.000130008	-8.93804e-06	-7.19687e-06	21		5.59241	37	-0.0380291	0.00538609	1.43662	0.0232632	49.4259	5.97685	0.119108	0.145038	12.0243	0.147291	2.62145	4.21901	0.233404	13.8852	31.2776	22.7522	19.6253	2.54359	0.239644	0.135249	-0.00395596
JP1	1.29045	1	0.00330624	0.0146047	0.0047998	0.00423422	0.00250561	2.17136	0.000299024	0.000174724	0.00693167	0.000211035	0.00212606	0.00216135	0.000265103	0.00321646	0.0167	0.0162324	0.00897748	0.0133376	0.000390882	3.64246e-06	-8.76468e-06	-7.05728e-06	22		5.53345	37	-0.112788	0.00635477	1.0915	0.0229817	52.3483	5.80551	0.42438	0.172855	9.3966	0.144434	3.1709	3.71133	0.118325	9.31171	29.103	20.2587	16.961	2.64154	0.234996	0.00378932	-0.00387923
JP1	1.28942	1	0.00222858	0.0043705	0.0057588	0.00384017	0.00169416	2.1061	0.000171424	0.000110384	0.00626769	0.000145916	0.00171691	0.0022668	0.000410905	0.00463266	0.0145814	0.0133651	0.00920946	0.0122327	0.00029161	0.00015505	-8.57676e-06	2.33912e-05	23		5.52904	37	-0.076025	0.00190168	1.30959	0.0208429	35.3951	5.63102	0.243288	0.109203	8.49651	0.0998664	2.56067	3.8924	0.183402	13.4116	25.4109	16.6803	17.3993	2.42271	0.175314	0.161301	-0.00379605
JP1	1.25398	1	0.00208745	0.00602656	0.00438066	0.00401733	0.00206942	2.05289	0.000108256	4.86335e-05	0.00520415	8.33406e-05	0.00132192	0.0024509	0.000519737	0.00316318	0.0127903	0.0126691	0.00843272	0.010853	0.000255244	6.26687e-05	-8.37758e-06	2.2848e-05	24		5.37706	37	-0.0712106	0.00262226	0.996187	0.0218045	43.2352	5.48876	0.153639	0.048113	7.05476	0.0570391	1.97156	4.20853	0.231977	9.15748	22.2896	15.8116	15.9318	2.14947	0.153451	0.0651953	-0.0037079
JP1	1.24361	1	0.00143403	0.00454275	0.00583976	0.00328097	0.00165687	2.09934	0.00010839	1.90636e-05	0.00426185	0.000231595	0.00167912	0.00156474	0.00031297	0.00257421	0.0106103	0.0118837	0.00642655	0.00982856	0.000196301	6.27465e-05	-8.38798e-06	-6.75396e-06	25		5.33261	37	-0.04892	0.00197663	1.32799	0.0178078	34.616	5.61294	0.153829	0.0188596	5.77738	0.158506	2.50431	2.68687	0.13969	7.45238	18.4905	14.8313	12.1416	1.94657	0.118015	0.0652762	-0.0037125
JP1	1.3865	1	0.00142973	0.00445393	0.00638332	0.00382637	0.00164082	2.2103	5.34314e-05	2.07328e-05	0.00544096	0.000219649	0.00208394	0.00208845	0.000308149	0.00312218	0.0114749	0.00979421	0.00627968	0.00801321	0.000277938	3.79114e-06	2.31023e-05	-7.34534e-06	26		5.94531	37	-0.0487733	0.00193798	1.4516	0.020768	34.2808	5.90963	0.0758309	0.0205109	7.37578	0.15033	3.10808	3.58615	0.137538	9.03877	19.9972	12.2236	11.8641	1.58704	0.167095	0.00394399	0.010225
JP1	1.35625	1	0.00259754	0.00257358	0.00560317	0.00384265	0.00171599	2.20726	2.09442e-05	2.04762e-05	0.00483224	0.000153279	0.00148528	0.00209442	0.00033616	0.003179	0.00989875	0.00798461	0.0052147	0.00644939	0.000338149	6.73958e-05	-9.00951e-06	2.45714e-05	27		5.81559	37	-0.0886116	0.00111981	1.27419	0.0208564	35.8511	5.90149	0.0297244	0.020257	6.55061	0.104905	2.21521	3.5964	0.15004	9.20328	17.2505	9.96514	9.85204	1.27732	0.203293	0.070113	-0.00398759
JP1	1.37538	1	0.00252139	0.0051115	0.00516449	0.00420509	0.00186633	2.14258	0.000147553	5.20569e-05	0.00398569	0.000184237	0.00106653	0.00198958	0.000239555	0.00357591	0.00893281	0.00756676	0.0040176	0.00518347	0.000146505	6.70801e-05	2.27094e-05	2.44563e-05	28		5.89764	37	-0.0860136	0.0022241	1.17444	0.0228235	38.9922	5.72857	0.20941	0.0514998	5.40302	0.126094	1.59066	3.41638	0.106922	10.3523	15.5672	9.44366	7.59038	1.0266	0.0880777	0.0697845	0.0100511
JP1	1.36179	1	0.00511292	0.00655193	0.00516987	0.00438726	0.00191627	2.08352	0.000175109	-1.10368e-05	0.00414165	8.71564e-05	0.0012277	0.00175815	0.000203099	0.00318422	0.00801501	0.00664943	0.00460642	0.00586896	0.000174085	0.000189332	5.31358e-05	5.48425e-05	29		5.83935	37	-0.17442	0.00285086	1.17566	0.0238123	40.0356	5.57066	0.248518	-0.0109187	5.61444	0.0596506	1.83104	3.01898	0.0906507	9.21837	13.9677	8.29878	8.70282	1.16236	0.104659	0.196965	0.0235178
JP1	1.32763	1	0.0024192	0.0110433	0.00511088	0.00387024	0.00218314	2.09974	0.000174154	1.98031e-05	0.00411906	0.000117461	0.00146724	0.00251835	0.000201991	0.00362885	0.00827939	0.00701359	0.00442739	0.00485169	8.07965e-05	0.000219079	2.20663e-05	5.45433e-05	30		5.69287	37	-0.0825277	0.00480511	1.16224	0.0210061	45.6111	5.61402	0.247162	0.0195911	5.58381	0.080391	2.1883	4.32436	0.0901561	10.5056	14.4284	8.75328	8.36458	0.96089	0.0485743	0.227911	0.00976648
JP1	1.40268	1	0.00384141	0.0197921	0.00531518	0.00505676	0.00265491	2.09795	0.000208112	0.000145138	0.00477714	0.000213053	0.00133371	0.00290124	0.000392666	0.00415398	0.00997221	0.00749776	0.00490271	0.00558365	0.000488391	0.000128705	5.36655e-05	-7.12476e-06	31		6.01466	37	-0.131044	0.00861187	1.2087	0.0274461	55.4676	5.60923	0.295356	0.143585	6.47591	0.145816	1.98915	4.98182	0.175261	12.0259	17.3785	9.35754	9.26259	1.10586	0.293617	0.133894	0.0237522
JP1	1.44779	1	0.00344489	0.0288719	0.00584112	0.00528376	0.00261069	2.24484	0.000279304	0.000182052	0.00699622	0.000381182	0.00169907	0.00322009	0.000372999	0.00419041	0.0116485	0.00890051	0.0063832	0.00708598	5.24214e-05	0.000132833	-9.13224e-06	2.49061e-05	32		6.20812	37	-0.117518	0.0125627	1.3283	0.0286782	54.5436	6.00197	0.396394	0.180103	9.4841	0.260884	2.53407	5.52933	0.166483	12.1313	20.2998	11.1082	12.0597	1.4034	0.0315154	0.138188	-0.00404191
JP1	1.45725	1	0.00145686	0.0436664	0.00446322	0.00490475	0.00272697	2.17159	0.000310077	0.000181183	0.00738053	0.000218836	0.00172307	0.00285157	0.000307008	0.00535896	0.0133613	0.0106261	0.00596748	0.00804776	0.000244804	0.000100093	5.51222e-05	2.47873e-05	33		6.24869	37	-0.0496989	0.019	1.01496	0.026621	56.9731	5.80612	0.440067	0.179244	10.0051	0.149773	2.56986	4.89653	0.137029	15.5143	23.2846	13.2618	11.2743	1.59388	0.147174	0.104129	0.0243969
JP1	1.37969	1	0.00278921	0.0678827	0.00440453	0.00568774	0.0025143	2.10292	0.000744212	0.000240438	0.00855391	0.000245873	0.0013737	0.00373768	0.000363721	0.00525072	0.0156753	0.0129	0.00672838	0.00876632	0.00033423	0.000192443	2.25519e-05	8.72006e-05	34		5.91611	37	-0.0951501	0.0295369	1.00162	0.0308708	52.5298	5.62253	1.0562	0.237865	11.5957	0.168278	2.04879	6.41811	0.162342	15.2009	27.3173	16.0998	12.7118	1.73619	0.200937	0.200201	0.0099814
JP1	1.3689	1	0.00285181	0.104667	0.00531283	0.0069607	0.00286042	2.09973	0.000911451	0.000243093	0.00864836	0.000662044	0.00212037	0.00365173	0.00046315	0.00524509	0.0159123	0.0135202	0.00887186	0.0111546	0.000401529	3.5546e-05	2.28009e-05	8.81634e-05	35		5.86982	37	-0.0972857	0.0455426	1.20817	0.0377799	59.7611	5.61399	1.29355	0.240491	11.7238	0.453109	3.1624	6.27053	0.206721	15.1846	27.7303	16.8738	16.7614	2.2092	0.241397	0.0369791	0.0100916
JP1	1.44311	1	0.00296402	0.170651	0.0050152	0.00647946	0.0030065	2.13593	0.00132571	0.000355793	0.0108637	0.000261283	0.00189437	0.00323651	0.000252803	0.00547953	0.0188015	0.0141438	0.00922432	0.0119917	0.000388607	0.000104218	2.39653e-05	2.58088e-05	36		6.18805	37	-0.101114	0.0742531	1.14049	0.0351679	62.8131	5.71078	1.88147	0.351985	14.7269	0.178825	2.82534	5.55753	0.112835	15.8633	32.7653	17.6521	17.4273	2.37499	0.233628	0.10842	0.010607
JP1	1.44841	1	0.00144611	0.254887	0.00436951	0.00756716	0.00360041	2.15113	0.00175665	0.00035499	0.010472	0.0003274	0.00142315	0.00372951	0.000152174	0.00716951	0.0177232	0.0177203	0.0103389	0.0124319	0.00038773	0.000103983	9.06175e-05	5.91037e-05	37		6.21077	37	-0.049332	0.110906	0.993652	0.0410715	75.2213	5.75143	2.49306	0.351191	14.1959	0.224076	2.12254	6.40407	0.0679206	20.7559	30.886	22.1158	19.533	2.46218	0.233101	0.108176	0.0401071
JP1	1.46709	1	0.00209104	0.318741	0.00467678	0.00865888	0.00388448	2.09946	0.00216252	0.000317566	0.0111305	0.000356188	0.00193203	0.00420953	0.000117317	0.00562849	0.0188517	0.017694	0.0115928	0.0132632	0.00028403	0.000102667	5.65396e-05	2.54247e-05	38		6.29088	37	-0.0713328	0.13869	1.06353	0.046997	81.1562	5.61328	3.06908	0.314168	15.0885	0.243778	2.88151	7.22834	0.0523627	16.2946	32.8527	22.0829	21.902	2.62681	0.170757	0.106806	0.0250243
JP1	1.47074	1	0.00190675	0.357242	0.0045015	0.00975305	0.00404356	2.09426	0.00295772	0.000608106	0.010992	0.000418035	0.0021746	0.00439782	0.000246672	0.0056079	0.0223344	0.0177217	0.0124627	0.0139205	0.000542271	0.000199544	2.33841e-05	0.000123036	39		6.30651	37	-0.0650463	0.155442	1.02367	0.0529357	84.4799	5.59938	4.19765	0.601598	14.9008	0.286107	3.24329	7.55165	0.110099	16.235	38.9219	22.1175	23.5455	2.757	0.32601	0.207589	0.0103497
JP1	1.48344	1	0.00169561	0.361463	0.00392528	0.00853485	0.0047976	1.97566	0.00241964	0.000580809	0.0118089	0.00039927	0.00182776	0.00401349	0.000204446	0.00566771	0.0183027	0.0193615	0.0119032	0.0151664	0.000299854	0.000284048	0.000209256	0.000148667	40		6.36097	37	-0.0578435	0.157279	0.892631	0.0463238	100.234	5.28228	3.434	0.574593	16.0082	0.273264	2.72599	6.8917	0.0912516	16.4081	31.8961	24.164	22.4885	3.00375	0.18027	0.2955	0.0926163
JP1	1.57018	1	0.000423356	0.355488	0.00392241	0.0100004	0.00511204	2.07468	0.00275436	0.000888778	0.0105452	0.000315606	0.00191846	0.00404527	0.000307449	0.00604249	0.0196301	0.0185317	0.0135725	0.0173904	0.00053452	0.00035745	0.000119505	0.000249884	41		6.7329	37	-0.0144422	0.154679	0.891979	0.0542784	106.803	5.54703	3.90905	0.879267	14.2951	0.216003	2.86127	6.94629	0.137226	17.4931	34.2093	23.1284	25.6423	3.44421	0.32135	0.371861	0.0528924
JP1	1.58219	1	0.000860346	0.300248	0.00416275	0.0100639	0.00606489	2.17763	0.00238193	0.000381649	0.0136719	0.0002562	0.00169362	0.003698	0.000116772	0.00638971	0.0195528	0.0210284	0.0131802	0.0181557	0.000348269	0.000364417	5.62773e-05	0.00015642	42		6.78441	37	-0.0293495	0.130643	0.946634	0.0546229	126.71	5.82226	3.38048	0.377565	18.5337	0.175346	2.52594	6.34997	0.0521198	18.4983	34.0746	26.2443	24.9011	3.5958	0.209377	0.379109	0.0249082
JP1	1.56145	1	-0.000548178	0.229489	0.00373516	0.00982292	0.00570054	2.09334	0.00201811	0.00043936	0.0123033	0.000444924	0.00179272	0.00360092	0.000146927	0.00592304	0.0194033	0.0214342	0.0134973	0.0188365	0.000664189	0.000551242	8.7493e-05	8.9269e-05	43		6.69547	37	0.0187003	0.0998546	0.849397	0.0533149	119.098	5.59692	2.86414	0.434657	16.6785	0.30451	2.67374	6.18326	0.0655788	17.1473	33.8141	26.7509	25.5003	3.73061	0.399306	0.573466	0.0387242
JP1	1.52764	1	0.00129731	0.171227	0.00376502	0.00828135	0.00517727	2.04131	0.00118155	0.000459449	0.0135583	0.000433494	0.00146428	0.00441863	0.000111776	0.0071213	0.0221758	0.0219218	0.0150677	0.0205514	0.00039612	0.000913591	0.000147997	0.000212479	44		6.5505	37	-0.0442561	0.0745038	0.856189	0.0449479	108.166	5.45779	1.67688	0.454532	18.3796	0.296687	2.18389	7.58738	0.0498899	20.6163	38.6456	27.3594	28.4671	4.07026	0.238145	0.950424	0.0655032
JP1	1.43009	1	-0.000119626	0.138469	0.00440023	0.00955948	0.00701215	1.89816	0.00117299	0.000626377	0.0140846	0.000570934	0.00132504	0.00357495	0.000320495	0.0058846	0.0200159	0.0222951	0.0149669	0.0204825	0.000565133	0.000853166	8.24385e-05	0.000205483	45		6.13221	37	0.00408088	0.0602502	1.00064	0.0518851	146.501	5.07507	1.66473	0.619673	19.0932	0.390752	1.97622	6.13867	0.143049	17.036	34.8815	27.8252	28.2767	4.05661	0.339754	0.887563	0.0364871
JP1	1.49354	1	0.00188374	0.143403	0.00417404	0.0103439	0.0066366	2.008	0.00114182	0.00086103	0.0144583	0.000368048	0.0013602	0.00379439	0.000204407	0.00688234	0.0216399	0.0227305	0.0178297	0.0244568	0.000486684	0.00124958	5.3478e-05	0.00027323	46		6.40428	37	-0.0642612	0.0623971	0.9492	0.0561424	138.655	5.36875	1.62049	0.851815	19.5997	0.251895	2.02865	6.51548	0.0912344	19.9245	37.7117	28.3687	33.6852	4.84374	0.292591	1.29995	0.0236692
JP1	1.60683	1	0.000262319	0.156011	0.00383598	0.0110604	0.00657798	2.12163	0.00102053	0.0007944	0.0179342	0.000671027	0.00114982	0.00392693	0.000147076	0.0061228	0.0221051	0.0253024	0.0184847	0.0242458	0.000503685	0.00109981	0.000119818	0.000186067	47		6.89007	37	-0.00894866	0.0678832	0.872325	0.0600317	137.43	5.67254	1.44835	0.785899	24.3117	0.459257	1.7149	6.74308	0.0656454	17.7256	38.5224	31.5785	34.9229	4.80194	0.302812	1.14415	0.0530311
JP1	1.6458	1	0.00101239	0.176026	0.00373121	0.0146894	0.00809433	2.06291	0.00146298	0.0013371	0.0177902	0.000621343	0.00177688	0.00347476	8.03481e-05	0.00655163	0.0207469	0.0267187	0.0185455	0.0263785	0.000521283	0.000881639	8.51898e-05	0.000180985	48		7.05719	37	-0.0345362	0.0765921	0.848499	0.079728	169.11	5.51556	2.07629	1.32279	24.1165	0.425253	2.65011	5.96665	0.0358623	18.9671	36.1555	33.3461	35.0377	5.22434	0.313392	0.917184	0.0377048
JP1	1.64006	1	-0.0015901	0.21356	0.00400567	0.016463	0.00762734	2.01933	0.00153957	0.00121605	0.0176164	0.000672455	0.00128149	0.00367685	0.000308911	0.00613583	0.0209862	0.02662	0.0208228	0.02818	0.000440148	0.00123137	0.000120073	8.95498e-05	49		7.03258	37	0.0542442	0.0929236	0.910912	0.0893546	159.354	5.39902	2.18498	1.20303	23.8808	0.460234	1.91126	6.31366	0.137878	17.7633	36.5726	33.2229	39.3402	5.58113	0.264614	1.28101	0.0531439
JP1	1.6251	1	-0.00159103	0.223247	0.00407265	0.016278	0.0076641	1.9748	0.00238119	0.00144302	0.0180478	0.00106072	0.00112062	0.00361435	0.000470707	0.00600978	0.0218734	0.0268624	0.0204461	0.0318877	0.00060202	0.000747237	0.000249436	0.000154248	50		6.96841	37	0.0542758	0.0971388	0.926144	0.0883504	160.122	5.27997	3.37943	1.42758	24.4657	0.72597	1.67134	6.20633	0.210094	17.3984	38.1187	33.5254	38.6285	6.31545	0.361931	0.777363	0.1104
JP1	1.7104	1	0.000883415	0.229127	0.00356723	0.0165105	0.00821631	2.12892	0.001705	0.00160354	0.0203102	0.000397698	0.00123418	0.00362887	0.000321846	0.00602218	0.0257796	0.0293892	0.0243267	0.0350581	0.000626863	0.00081173	5.77863e-05	0.000160614	51		7.33417	37	-0.0301365	0.0996969	0.811209	0.0896124	171.659	5.69205	2.41977	1.58638	27.5326	0.272188	1.8407	6.23126	0.143652	17.4343	44.926	36.679	45.96	6.94336	0.376866	0.844456	0.0255761
JP1	1.71498	1	-0.000224442	0.210394	0.00377151	0.0168162	0.00899986	2.09257	0.00150406	0.00150359	0.0207126	0.000477612	0.00160113	0.00370128	0.000243784	0.00696158	0.0241092	0.0288596	0.0261768	0.0331258	0.000858279	0.00109981	5.53461e-05	0.000153831	52		7.35383	37	0.00765653	0.0915463	0.857664	0.0912714	188.029	5.59486	2.13459	1.4875	28.0781	0.326882	2.38799	6.35561	0.108809	20.1539	42.0149	36.0181	49.4554	6.56065	0.515992	1.14415	0.024496
JP1	1.78414	1	-0.000195148	0.19612	0.00439334	0.0145366	0.00800323	2.23173	0.000972319	0.00139803	0.0205064	0.000387385	0.00116939	0.00353476	0.000346284	0.00576766	0.0223169	0.031555	0.0264248	0.0365799	0.000971234	0.000692327	8.9072e-05	0.000123664	53		7.6504	37	0.00665722	0.0853352	0.999071	0.0788986	167.207	5.96693	1.37993	1.38307	27.7985	0.26513	1.74407	6.06967	0.154559	16.6975	38.8915	39.3821	49.9239	7.24476	0.5839	0.720239	0.039423
JP1	1.75953	1	-0.000979962	0.168998	0.00355881	0.0114389	0.00939309	2.04171	0.00143811	0.00121717	0.0210275	0.000403676	0.00115498	0.00415226	0.000175204	0.00569875	0.0238095	0.028641	0.0249453	0.0368487	0.000649633	0.000539161	8.55756e-05	0.00011881	54		7.54484	37	0.0334301	0.0735341	0.809294	0.0620858	196.244	5.45886	2.04099	1.20414	28.5049	0.276279	1.72259	7.13	0.0782	16.498	41.4926	35.7453	47.1288	7.29798	0.390555	0.560898	0.0378755
JP1	1.66542	1	-0.000679626	0.14491	0.00342154	0.0128891	0.00817192	2.0066	0.00111885	0.00111837	0.0195778	0.000639715	0.00153888	0.00444945	0.000308701	0.00603481	0.0223959	0.0303592	0.0279634	0.0383172	0.000633543	0.00042347	0.000119991	8.94889e-05	55		7.14133	37	0.0231845	0.0630528	0.778077	0.0699569	170.731	5.36499	1.58789	1.1064	26.5398	0.437826	2.29514	7.64032	0.137785	17.4709	39.0293	37.8897	52.8308	7.58883	0.380882	0.440543	0.0531077
JP1	1.69878	1	-0.000837655	0.115347	0.00410926	0.0107936	0.0106665	2.11764	0.00109108	0.001124	0.0208973	0.000561817	0.00155918	0.00423693	0.000119021	0.00561001	0.0233117	0.0350405	0.0298112	0.0430034	0.000889523	0.000438252	5.73609e-05	0.000159431	56		7.28435	37	0.0285755	0.0501894	0.93447	0.0585831	222.85	5.66187	1.54849	1.11197	28.3285	0.384513	2.32543	7.27539	0.0531233	16.2411	40.6251	43.7321	56.3217	8.51693	0.534775	0.455921	0.0253878
JP1	1.70907	1	0.000449007	0.094788	0.0035456	0.0121446	0.0107843	2.19608	0.00138643	0.00094263	0.0208507	0.000402927	0.0016596	0.00371068	0.000291978	0.00654501	0.0254346	0.0384011	0.0325829	0.0492595	0.000532807	0.000617805	9.26457e-05	0.000196825	57		7.3285	37	-0.0153173	0.0412439	0.806289	0.065916	225.31	5.87161	1.96764	0.932541	28.2653	0.275767	2.4752	6.37175	0.130321	18.9479	44.3247	47.9263	61.5584	9.75599	0.32032	0.642713	0.0410048
JP1	1.74325	1	0.00176102	0.101426	0.00352633	0.0128208	0.0105895	2.10949	0.000959598	0.00076499	0.0201083	0.000447028	0.00151	0.00429773	0.000374109	0.00565985	0.0233224	0.0368917	0.0327673	0.0515096	0.000602619	0.00074798	5.55513e-05	8.9691e-05	58		7.47502	37	-0.0600748	0.0441323	0.801908	0.0695863	221.241	5.6401	1.36188	0.756803	27.259	0.30595	2.25207	7.37978	0.166978	16.3854	40.6438	46.0425	61.9067	10.2016	0.36229	0.778136	0.0245869
JP1	1.74514	1	0.00137103	0.141124	0.00331987	0.015512	0.0121246	2.03415	0.00115919	0.00071602	0.0172756	0.000531754	0.00188683	0.0041054	8.10304e-05	0.00540469	0.025172	0.0377699	0.0352306	0.0542113	0.000905168	0.00111048	2.26699e-05	2.44137e-05	59		7.48314	37	-0.0467709	0.0614056	0.754959	0.0841929	253.313	5.43865	1.64514	0.708357	23.4189	0.363937	2.8141	7.04953	0.0361668	15.6467	43.8672	47.1386	66.5606	10.7367	0.544181	1.15525	0.0100336
JP1	1.79778	1	0.00117737	0.188817	0.00362472	0.0208991	0.0115627	1.93718	0.00220154	0.00075701	0.0165362	0.000608725	0.00180223	0.00346563	0.000355184	0.00518891	0.0236521	0.0407963	0.0349341	0.0522626	0.000541415	0.00144739	5.27411e-05	2.37165e-05	60		7.70886	37	-0.0401642	0.0821574	0.824281	0.113432	241.573	5.17939	3.12447	0.748908	22.4166	0.416617	2.68792	5.95097	0.158531	15.022	41.2183	50.9156	66.0004	10.3508	0.325495	1.50574	0.0233431
JP1	1.79728	1	-0.000455589	0.22713	0.00403642	0.0227814	0.0129446	1.99626	0.00281253	0.00108168	0.0129621	0.000844147	0.00165906	0.00324167	0.000229502	0.00464034	0.0228184	0.0420725	0.035213	0.0568987	0.000352788	0.00188541	2.17564e-05	-6.91741e-06	61		7.70672	37	0.0155418	0.098828	0.917906	0.123649	270.444	5.33736	3.9916	1.07011	17.5714	0.577741	2.47439	5.56638	0.102435	13.4339	39.7656	52.5083	66.5272	11.2689	0.212094	1.96142	0.00962931
JP1	1.91109	1	0.000209024	0.282633	0.00301996	0.0274433	0.0139508	2.04474	0.00295252	0.000781354	0.0120266	0.000727768	0.00142729	0.00366048	0.000192454	0.00451355	0.0224329	0.0391538	0.0347943	0.0510709	0.000428898	0.00155804	0.000109004	5.1968e-05	62		8.19474	37	-0.00713055	0.122979	0.686756	0.148951	291.466	5.46696	4.19028	0.772992	16.3033	0.498091	2.12872	6.28555	0.0858994	13.0668	39.0937	48.8656	65.7362	10.1147	0.257851	1.62086	0.0482447
JP1	2.07584	1	-0.00106211	0.352423	0.00308524	0.0309622	0.0153948	2.01625	0.00372295	0.00107683	0.0120219	0.000523559	0.00163593	0.00269826	0.000163464	0.00425836	0.0224203	0.0373148	0.0345115	0.0513823	0.000459168	0.00206082	7.98412e-05	0.000110848	63		8.9012	37	0.0362324	0.153345	0.701602	0.16805	321.634	5.39079	5.28368	1.06531	16.297	0.358329	2.4399	4.63327	0.0729598	12.328	39.0717	46.5706	65.202	10.1764	0.276049	2.14391	0.0353375
JP1	2.104	1	-0.000656403	0.417668	0.00267792	0.0346908	0.0151154	1.92859	0.00430701	0.00094188	0.0105076	0.000470776	0.00165702	0.00255444	0.00016557	0.0038367	0.0204111	0.0338789	0.0320866	0.0476252	0.000524616	0.00256363	8.08701e-05	8.25116e-05	64		9.02193	37	0.0223923	0.181734	0.608976	0.188288	315.798	5.15643	6.11258	0.9318	14.2442	0.322203	2.47134	4.38632	0.0739001	11.1073	35.5702	42.2824	60.6207	9.43231	0.315396	2.66699	0.0357929
JP1	2.0157	1	0.000566415	0.405505	0.00288928	0.0377598	0.0160406	1.84496	0.00456193	0.00134599	0.00893389	0.000849768	0.00184807	0.00315001	0.00031148	0.00344722	0.0194234	0.0355786	0.0310785	0.0472721	0.000224856	0.00286452	0.000139098	0.000111235	65		8.64332	37	-0.0193225	0.176442	0.65704	0.204945	335.128	4.93282	6.47438	1.33158	12.1108	0.581588	2.75628	5.40899	0.139025	9.97978	33.849	44.4037	58.716	9.36236	0.135182	2.98	0.0615645
JP1	2.0705	1	0.000683206	0.416629	0.00247963	0.0463171	0.018588	1.8266	0.004417	0.00123022	0.00859633	0.000699518	0.00120276	0.00222174	0.000184984	0.00306932	0.018199	0.0318568	0.0314336	0.04414	0.000355873	0.00299181	0.000104772	4.99508e-05	66		8.8783	37	-0.0233066	0.181282	0.563882	0.251391	388.348	4.88373	6.2687	1.21705	11.6532	0.478756	1.79384	3.81504	0.082565	8.88575	31.7153	39.7587	59.3869	8.74206	0.213949	3.11243	0.0463719
JP1	2.25383	1	-0.000710498	0.431468	0.00291815	0.0555165	0.0190284	1.90144	0.00495111	0.00135011	0.00830137	0.0011283	0.00149252	0.00246025	0.000214304	0.00280225	0.0170743	0.0338192	0.0308323	0.0479845	0.000187737	0.00317773	-8.02208e-06	2.18784e-05	67		9.66441	37	0.0242377	0.187739	0.663604	0.301321	397.551	5.08384	7.02671	1.33566	11.2534	0.772219	2.22601	4.22458	0.0956517	8.11257	29.7553	42.2079	58.251	9.50346	0.112867	3.30584	-0.00355055
JP1	2.27222	1	0.00138757	0.441314	0.00253659	0.0590404	0.0208644	1.84963	0.00452669	0.00147518	0.00717769	0.000777792	0.00104374	0.00204646	1.51827e-05	0.00258815	0.0168044	0.0341106	0.0314546	0.0504986	0.000259793	0.00299977	0.000127317	-6.15248e-06	68		9.74326	37	-0.0473349	0.192023	0.576836	0.320448	435.908	4.9453	6.42437	1.45939	9.73011	0.532328	1.55667	3.51406	0.0067766	7.49275	29.2848	42.5716	59.4266	10.0014	0.156186	3.12071	0.05635
JP1	2.19708	1	-5.05227e-05	0.417481	0.00193352	0.0541875	0.0209978	1.73378	0.00462006	0.001141	0.00689969	0.000648786	0.0012201	0.0016682	0.000171568	0.00266372	0.0172198	0.0349832	0.0326203	0.0495419	0.000120915	0.00272254	1.87427e-05	0.000124759	69		9.42108	37	0.00172351	0.181653	0.439694	0.294108	438.695	4.63555	6.55688	1.12879	9.35325	0.444035	1.81971	2.86452	0.076577	7.71152	30.0088	43.6607	61.6289	9.81192	0.072693	2.83231	0.00829548
JP1	2.14103	1	0.000583002	0.392317	0.00212464	0.0495996	0.023557	1.6809	0.00471592	0.000856584	0.00595359	0.000493749	0.00135583	0.00154318	0.000145964	0.00277856	0.0184149	0.037619	0.0359847	0.055547	0.00038377	0.00223381	-7.42843e-06	4.65e-05	70		9.18073	37	-0.0198883	0.170704	0.483156	0.269207	492.163	4.49417	6.69293	0.847417	8.07072	0.337926	2.02215	2.64986	0.0651489	8.04399	32.0915	46.9502	67.9852	11.0012	0.23072	2.32387	-0.0032878
JP1	2.15768	1	0.00232487	0.360155	0.00186051	0.0520056	0.0228788	1.7614	0.00479088	0.00114433	0.00576537	0.000493361	0.00138099	0.00196175	9.34089e-05	0.00230416	0.0184004	0.0424415	0.0404119	0.062165	0.000278588	0.00280915	-7.42258e-06	7.26835e-05	71		9.25212	37	-0.0793096	0.15671	0.42309	0.282266	477.993	4.70941	6.7993	1.13208	7.81556	0.337661	2.05966	3.3686	0.0416918	6.67057	32.0663	52.9688	76.3495	12.312	0.167485	2.92241	-0.00328522
JP1	2.16438	1	2.07017e-06	0.332123	0.00221622	0.0520062	0.0250285	1.81896	0.00375832	0.000898679	0.00616762	0.000369057	0.00111306	0.00138391	4.17374e-05	0.0026949	0.0215047	0.0486145	0.0486699	0.0723764	0.000257102	0.00262144	1.91501e-05	-6.08875e-06	72		9.28083	37	-7.06211e-05	0.144512	0.503982	0.282269	522.906	4.8633	5.33387	0.889061	8.36086	0.252586	1.66007	2.37637	0.0186289	7.80179	37.4761	60.673	91.9512	14.3343	0.154568	2.72713	0.00847578
JP1	2.22759	1	-0.000135769	0.27962	0.00211001	0.0478752	0.0272322	1.81924	0.00336341	0.00133352	0.00542431	0.000515832	0.00111492	0.00183152	9.76634e-05	0.00257386	0.0279294	0.0606932	0.0570196	0.0918148	0.000236448	0.00214181	4.70679e-05	2.11654e-05	73		9.55189	37	0.00463158	0.121668	0.479829	0.259848	568.947	4.86405	4.77341	1.31925	7.35321	0.35304	1.66283	3.14496	0.0435908	7.45139	48.6724	75.7478	107.726	18.1842	0.142151	2.22817	0.0208321
JP1	2.04428	1	-0.000501146	0.225605	0.00234261	0.0367724	0.0278003	1.78541	0.0030196	0.000859535	0.00676483	0.000363795	0.00109719	0.0018908	0.000251791	0.00255116	0.028121	0.0692156	0.0640343	0.0993205	0.00033243	0.00166222	-7.45402e-06	-6.00194e-06	74		8.76586	37	0.0170959	0.0981646	0.532723	0.199586	580.816	4.7736	4.28547	0.850337	9.17043	0.248984	1.6364	3.24677	0.112383	7.38565	49.0064	86.3841	120.979	19.6707	0.199855	1.72923	-0.00329913
JP1	1.88822	1	0.00164133	0.163318	0.00275942	0.0280514	0.0285289	1.80492	0.00236448	0.000928572	0.00640038	0.000270931	0.00134329	0.00181635	9.83265e-05	0.00317095	0.030918	0.0789661	0.0677897	0.112088	0.000293255	0.00138354	4.73875e-05	2.13092e-05	75		8.09667	37	-0.0559917	0.0710623	0.627509	0.152252	596.037	4.82576	3.35571	0.918634	8.67638	0.185427	2.00344	3.11892	0.0438867	9.17996	53.8806	98.5532	128.074	22.1994	0.176303	1.43932	0.0209736
JP1	1.89821	1	-0.000462242	0.120275	0.00338656	0.0263964	0.0303378	1.7869	0.00211432	0.000481667	0.0075715	0.000240664	0.00128301	0.00187233	4.81101e-05	0.00399961	0.0392544	0.0898981	0.0828685	0.13125	0.000511891	0.000773384	2.2074e-05	2.3772e-05	76		8.1395	37	0.0157687	0.0523336	0.770125	0.143269	633.83	4.77759	3.00068	0.476512	10.264	0.164712	1.91354	3.21505	0.0214733	11.5789	68.4084	112.197	156.562	25.9944	0.307746	0.804564	0.00976991
JP1	1.86447	1	-3.18817e-05	0.0857713	0.00345523	0.019833	0.032869	2.38084	0.00130147	0.000678876	0.00995136	0.000201007	0.00240777	0.00258574	0.00026136	0.00400543	0.0499652	0.115031	0.109962	0.166664	0.000505441	0.000384226	-9.78354e-06	-7.87766e-06	77		7.99485	37	0.0010876	0.0373206	0.785739	0.107646	686.713	6.36558	1.84706	0.671611	13.4901	0.137571	3.59105	4.44007	0.116655	11.5958	87.074	143.563	207.748	33.0083	0.303868	0.399717	-0.00433017
JP1	1.7675	1	0.000942006	0.0587574	0.00373327	0.0145807	0.0331821	2.10892	0.00148874	0.000321477	0.00866462	0.000327237	0.00248954	0.00242719	0.000252107	0.00539777	0.0579551	0.132248	0.116466	0.179208	0.00045421	0.000237277	2.38993e-05	5.90742e-05	78		7.57903	37	-0.0321352	0.0255663	0.848967	0.0791384	693.255	5.63856	2.11285	0.318036	11.7458	0.223964	3.713	4.16782	0.112525	15.6266	100.998	165.052	220.037	35.4927	0.273068	0.246844	0.0105778
JP1	1.72423	1	-0.00117473	0.0391951	0.0042581	0.0119668	0.0332359	1.94362	0.000801454	0.000313436	0.0100097	0.000156539	0.00197191	0.00213896	0.000180796	0.00565312	0.0611525	0.141716	0.117538	0.18356	0.000442849	0.000231343	2.33016e-05	2.5094e-05	79		7.39349	37	0.0400743	0.0170545	0.968316	0.0649513	694.379	5.1966	1.13744	0.310082	13.5691	0.107136	2.94099	3.67289	0.080696	16.3659	106.57	176.868	222.063	36.3546	0.266238	0.24067	0.0103132
JP1	1.71882	1	-0.000540563	0.0350442	0.00452111	0.00951337	0.0388843	2.04255	0.000764432	0.000359083	0.0106265	0.000297438	0.0017432	0.0019166	0.000187666	0.00559768	0.0692878	0.147444	0.131174	0.193502	0.000425939	0.000105182	2.4187e-05	5.97852e-05	80		7.37027	37	0.0184405	0.0152483	1.02813	0.0516348	812.389	5.46112	1.0849	0.35524	14.4053	0.203569	2.59988	3.29106	0.0837622	16.2054	120.747	184.017	247.825	38.3236	0.256072	0.109423	0.0107051
JP1	1.6302	1	0.00141322	0.0195768	0.00427085	0.00833835	0.0393955	2.135	0.00112297	0.00038847	0.0109429	0.000327507	0.00215762	0.00222901	0.000118859	0.00690461	0.072152	0.150968	0.138054	0.195845	0.000387857	0.000170745	-9.44497e-06	5.9123e-05	81		6.99026	37	-0.04821	0.00851822	0.971216	0.0452572	823.069	5.70828	1.59374	0.384313	14.8342	0.224149	3.21797	3.82752	0.0530513	19.989	125.739	188.415	260.822	38.7876	0.233177	0.177629	-0.00418032
JP1	1.57598	1	-0.000544033	0.0121755	0.00428283	0.00731492	0.0392195	2.02153	0.000660225	0.000340158	0.0108664	0.00044156	0.00171524	0.00213518	0.000209735	0.00623013	0.0719507	0.151474	0.129808	0.199594	0.000531329	0.000163558	2.29122e-05	0.000120554	82		6.75777	37	0.0185589	0.00529776	0.97394	0.0397025	819.391	5.40491	0.937003	0.336518	14.7305	0.302207	2.55819	3.6664	0.0936124	18.0364	125.388	189.046	245.244	39.5301	0.319431	0.170152	0.0101409
JP1	1.6183	1	6.90101e-05	0.00812475	0.00394805	0.00733268	0.0417689	2.08385	0.000646773	0.000448883	0.0103301	0.000421667	0.00196318	0.00203358	0.000281716	0.00654527	0.0766918	0.164044	0.143158	0.214331	0.000448278	0.000102574	-9.31392e-06	9.12038e-05	83		6.93927	37	-0.00235418	0.00353522	0.89781	0.0397989	872.654	5.57153	0.917913	0.444079	14.0035	0.288592	2.92797	3.49193	0.12574	18.9487	133.65	204.735	270.467	42.4488	0.269502	0.10671	-0.00412232
JP1	1.66626	1	-0.00196392	0.00611365	0.00467243	0.00818105	0.0408611	2.04077	0.000949549	0.000352655	0.00990546	0.000557182	0.00164572	0.00168348	0.000151173	0.00742055	0.0869991	0.16696	0.142554	0.213733	0.000617115	0.000103299	-9.37976e-06	5.87149e-05	84		7.14489	37	0.0669963	0.00266016	1.06254	0.0444035	853.688	5.45637	1.34762	0.348881	13.4279	0.38134	2.4545	2.89077	0.0674738	21.4826	151.613	208.373	269.324	42.3304	0.371006	0.107464	-0.00415146
JP1	1.60605	1	-6.29085e-05	0.00427011	0.00361296	0.0057228	0.0377154	2.06174	0.000705033	0.000411579	0.0108725	0.000352098	0.00174708	0.00263089	0.000246181	0.00751866	0.0825818	0.163966	0.13903	0.217567	0.000476086	3.63826e-05	2.33375e-05	2.51327e-05	85		6.88671	37	0.00214604	0.001858	0.821609	0.0310611	787.967	5.51241	1.0006	0.407174	14.7388	0.240979	2.60568	4.51759	0.10988	21.7667	143.915	204.637	262.666	43.0897	0.28622	0.0378495	0.0103291
JP1	1.65091	1	0.000198352	0.00281744	0.00330649	0.00719385	0.0410321	2.08972	0.000799506	0.00053964	0.0109918	0.000415548	0.00144834	0.00236073	0.000342475	0.00735913	0.0793411	0.163448	0.14174	0.212534	0.000636315	3.81455e-06	2.32449e-05	8.98804e-05	86		7.07908	37	-0.0067665	0.00122592	0.751915	0.0390454	857.261	5.58724	1.13467	0.533865	14.9005	0.284405	2.16011	4.0537	0.152859	21.3048	138.267	203.99	267.787	42.0929	0.382548	0.00396834	0.0102881
JP1	1.64185	1	0.00116225	0.00252924	0.00507028	0.00697369	0.0402297	2.0692	0.0010092	0.000317441	0.012115	0.000520637	0.00166793	0.00272623	0.000150188	0.00786667	0.0833751	0.168389	0.145507	0.210643	0.000448508	0.000135545	-9.3187e-06	9.12507e-05	87		7.04025	37	-0.0396487	0.00110052	1.15301	0.0378504	840.497	5.53237	1.43228	0.314044	16.4231	0.356329	2.48762	4.68131	0.0670346	22.7742	145.297	210.157	274.904	41.7184	0.26964	0.14101	-0.00412444
JP1	1.58105	1	0.000391855	0.00260639	0.003674	0.00640861	0.0405286	2.02056	0.000955927	0.000407516	0.0110556	0.000413086	0.00185877	0.00231451	8.25934e-05	0.00770263	0.0799121	0.161888	0.134874	0.211177	0.000503618	3.60235e-05	2.31072e-05	5.71163e-05	88		6.77954	37	-0.0133676	0.00113409	0.835488	0.0347834	846.741	5.40231	1.35667	0.403155	14.987	0.282719	2.77224	3.97433	0.0368645	22.2993	139.262	202.044	254.815	41.8241	0.302772	0.0374759	0.0102272
JP1	1.61811	1	-0.00176929	0.00312928	0.00430504	0.00736609	0.0409085	2.01178	0.000706315	0.000379715	0.0110882	0.000646246	0.0013263	0.00234183	0.000214017	0.00743449	0.0819087	0.161806	0.138421	0.217037	0.000900908	3.64488e-05	2.338e-05	5.77905e-05	89		6.93845	37	0.0603567	0.0013616	0.97899	0.0399802	854.678	5.37886	1.00242	0.375651	15.0313	0.442297	1.9781	4.02125	0.0955234	21.523	142.742	201.941	261.516	42.9848	0.54162	0.0379183	0.0103479
JP1	1.57241	1	-0.00186666	0.00558834	0.00410049	0.00559941	0.038567	1.99101	0.000885978	0.000693307	0.0125594	0.000506643	0.00168716	0.00246075	0.000242251	0.00781539	0.081522	0.16099	0.135866	0.208158	0.00030832	0.000163935	-9.06823e-06	2.47315e-05	90		6.74247	37	0.0636784	0.00243158	0.932476	0.0303914	805.758	5.3233	1.2574	0.685888	17.0256	0.346751	2.5163	4.22545	0.108126	22.6257	142.068	200.923	256.689	41.2263	0.18536	0.170544	-0.00401358
JP1	1.64851	1	0.000429739	0.0056606	0.00447143	0.00697929	0.0404122	2.1737	0.000706841	0.000379998	0.0120769	0.000385637	0.00207793	0.00283345	0.00018154	0.00773376	0.0811134	0.163157	0.138988	0.200452	0.00054258	0.000134385	2.33974e-05	5.78336e-05	91		7.06878	37	-0.01466	0.00246302	1.01683	0.0378808	844.31	5.81176	1.00316	0.375931	16.3715	0.263933	3.09911	4.86542	0.0810278	22.3894	141.356	203.627	262.588	39.7001	0.326195	0.139803	0.0103556
JP1	1.67456	1	-0.000807461	0.00347894	0.00380011	0.00598402	0.0392286	2.10555	0.000697499	0.000503796	0.0117559	0.000477155	0.0022437	0.00215158	0.000211346	0.00808306	0.0797812	0.155785	0.127993	0.200377	0.000664229	0.000164814	-9.11687e-06	5.70692e-05	92		7.18052	37	0.0275454	0.00151374	0.864168	0.0324789	819.58	5.62955	0.989904	0.498404	15.9364	0.326569	3.34634	3.69456	0.0943312	23.4006	139.034	194.426	241.816	39.6852	0.39933	0.171459	-0.0040351
JP1	1.58756	1	-0.00103287	0.00395985	0.00492197	0.00591206	0.04132	2.03821	0.00053579	0.000567481	0.0103885	0.000251399	0.00188703	0.00240647	0.000339732	0.00781513	0.0748439	0.146682	0.126687	0.188378	0.000502562	3.784e-06	-9.10524e-06	-7.33149e-06	93		6.80745	37	0.0352348	0.001723	1.11929	0.0320883	863.276	5.44952	0.760404	0.561408	14.0826	0.17206	2.8144	4.13224	0.151635	22.6249	130.43	183.066	239.348	37.3087	0.302137	0.00393655	-0.00402996
JP1	1.61854	1	-3.00728e-05	0.00342307	0.00505378	0.00553503	0.0378349	2.06823	0.00057564	0.000672958	0.011965	0.000482996	0.00233636	0.00230831	0.000376929	0.00710525	0.0760869	0.136937	0.125855	0.185983	0.00063976	0.000199431	-9.22846e-06	2.51685e-05	94		6.94029	37	0.00102589	0.00148944	1.14926	0.0300419	790.464	5.52977	0.816959	0.665756	16.2198	0.330567	3.48454	3.96369	0.168237	20.5698	132.596	170.903	237.775	36.8345	0.384619	0.207471	-0.00408449
JP1	1.60237	1	-0.000736351	0.00139351	0.00437445	0.00545308	0.0375392	2.08309	0.000787296	0.000148256	0.0114631	0.000377273	0.00216057	0.00245271	0.000209531	0.00663946	0.0646715	0.13373	0.115721	0.171833	0.00033924	3.56848e-05	-9.03859e-06	2.46507e-05	95		6.87095	37	0.0251196	0.000606339	0.994774	0.0295971	784.286	5.56952	1.11735	0.14667	15.5394	0.258209	3.22237	4.21164	0.0935213	19.2214	112.703	166.901	218.629	34.032	0.203949	0.0371235	-0.00400046
JP1	1.6586	1	-0.00068341	0.00107663	0.0045012	0.00555049	0.0385778	2.19105	0.000840793	0.000260625	0.0123788	0.000402909	0.00223919	0.00197117	0.000291965	0.00644241	0.0697875	0.137173	0.118366	0.179479	0.000532782	0.000106306	-9.65276e-06	9.45218e-05	96		7.11206	37	0.0233136	0.000468461	1.0236	0.0301258	805.984	5.85815	1.19327	0.257835	16.7807	0.275754	3.33962	3.38477	0.130314	18.6509	121.618	171.198	223.627	35.5463	0.320305	0.110592	-0.00427229
JP1	1.68767	1	-0.00184286	0.00189075	0.0049141	0.00582378	0.0385106	2.13132	0.000512875	0.000545148	0.0114318	0.00035428	0.00211821	0.00235207	0.000247707	0.00628685	0.0641008	0.121467	0.104416	0.157759	0.000413528	6.93628e-05	-9.27246e-06	-7.46614e-06	97		7.23673	37	0.0628666	0.000822698	1.11749	0.0316092	804.58	5.69847	0.727882	0.539314	15.497	0.242472	3.15919	4.03883	0.110561	18.2006	111.708	151.596	197.271	31.2447	0.24861	0.0721593	-0.00410397
JP1	1.64168	1	-0.000668867	0.00347089	0.00517365	0.00576677	0.04129	2.03664	0.000555921	0.000321823	0.0112797	0.000260845	0.00249223	0.00179573	0.000185634	0.00600463	0.0607055	0.111754	0.0980473	0.155415	0.000387955	0.000137416	2.39251e-05	5.9138e-05	98		7.03951	37	0.0228175	0.00151024	1.17652	0.0312997	862.649	5.44531	0.788974	0.318379	15.2908	0.178525	3.71701	3.08352	0.0828554	17.3835	105.791	139.473	185.239	30.7803	0.233236	0.142956	0.0105892
JP1	1.64624	1	-0.000197384	0.00101351	0.00467611	0.00596246	0.0377835	2.05973	0.000386579	0.000352932	0.0116395	0.000192863	0.00201177	0.00261361	0.000250771	0.0051367	0.055846	0.109396	0.0929306	0.139912	0.000617601	0.00013654	2.37726e-05	9.19208e-05	99		7.05907	37	0.00673347	0.000440998	1.06337	0.0323619	789.389	5.50704	0.548641	0.349155	15.7786	0.131997	3.00044	4.48793	0.111928	14.8708	97.3225	136.531	175.572	27.71	0.371297	0.142045	0.0105217
JP1	1.57581	1	-0.00211508	0.000939237	0.00536274	0.00561774	0.0362858	2.08868	0.000547929	0.000218519	0.0103603	0.000158417	0.0023245	0.00213174	0.000281643	0.0065107	0.0548002	0.0985969	0.0862009	0.132155	0.000875767	3.67624e-05	2.35811e-05	9.11804e-05	100		6.75706	37	0.0721531	0.000408678	1.21952	0.0304909	758.099	5.58444	0.777631	0.21618	14.0445	0.108422	3.46685	3.66048	0.125708	18.8486	95.4999	123.053	162.858	26.1737	0.526506	0.0382445	0.010437
JP1	1.67276	1	-0.000782225	-0.000975315	0.00519033	0.00586097	0.0348537	2.23392	0.000565003	0.000225328	0.00932511	0.000265106	0.00205775	0.00233383	0.000256502	0.00569537	0.0559959	0.0970741	0.0861813	0.122438	0.000529963	0.000105743	-9.60168e-06	2.61864e-05	101		7.17278	37	0.0266845	-0.000424376	1.18031	0.031811	728.178	5.97277	0.801862	0.222916	12.6412	0.181441	3.06902	4.00751	0.114486	16.4882	97.5838	121.153	162.821	24.2491	0.31861	0.110006	-0.00424968
JP1	1.78847	1	-0.0021675	-0.000291418	0.00542824	0.00471102	0.0335518	2.08701	0.000291846	0.000358766	0.00960487	0.000162343	0.0023484	0.00204974	0.00035604	0.0051879	0.0533097	0.0900026	0.075105	0.114013	0.000560394	7.13815e-05	2.41656e-05	0.000127148	102		7.66895	37	0.0739414	-0.000126801	1.23441	0.0255696	700.978	5.58	0.414193	0.354927	13.0204	0.111109	3.5025	3.51968	0.158914	15.0191	92.9025	112.327	141.894	22.5805	0.336905	0.0742593	0.0106956
JP1	1.5759	1	-0.000253356	0.000300456	0.00543568	0.00463208	0.0284006	1.97677	0.000148028	0.000147561	0.00880063	0.00021661	0.00218222	0.00202777	0.000144991	0.0052091	0.0492997	0.0819313	0.0696852	0.0970647	0.000210534	3.55175e-05	-8.9962e-06	8.80927e-05	103		6.75746	37	0.00864291	0.000130733	1.23611	0.0251411	593.359	5.28525	0.210085	0.145982	11.9302	0.14825	3.25466	3.48195	0.0647147	15.0805	85.9143	102.254	131.655	19.2239	0.126572	0.0369494	-0.0039817
JP1	1.5993	1	-0.000296738	0.00227484	0.00439882	0.00462214	0.0301556	2.05347	0.000352484	0.000318925	0.0084305	0.000258496	0.00227102	0.00240793	0.000183963	0.00621546	0.0473484	0.0794568	0.0672538	0.0947953	0.000384461	3.69627e-05	2.37097e-05	0.000124749	104		6.8578	37	0.0101228	0.000989822	1.00032	0.0250871	630.024	5.49031	0.500251	0.315512	11.4284	0.176917	3.38709	4.13474	0.0821092	17.9939	82.5138	99.1656	127.061	18.7745	0.231136	0.038453	0.0104938
JP1	1.64797	1	-0.000479742	0.000461655	0.00500273	0.00478834	0.0295505	2.13568	0.000159591	9.05653e-05	0.00897348	6.22243e-05	0.00238694	0.00246025	0.000122055	0.00541044	0.0475356	0.0783047	0.0641499	0.091385	0.000466808	4.03072e-06	-9.69893e-06	6.07128e-05	105		7.06649	37	0.0163657	0.000200874	1.13765	0.0259892	617.382	5.71012	0.226495	0.0895961	12.1645	0.0425869	3.55999	4.22459	0.0544778	15.6633	82.84	97.7278	121.197	18.0991	0.280642	0.00419323	-0.00429272
JP1	1.711	1	-0.00027104	0.00144944	0.00469183	0.0049214	0.0258352	2.21503	0.000396339	0.000225854	0.00921058	0.00033372	0.00236853	0.0022373	0.000257102	0.00455211	0.043923	0.0694065	0.0577683	0.0830278	0.000565199	3.99964e-06	2.43728e-05	2.62476e-05	106		7.33676	37	0.00924617	0.000630678	1.06695	0.0267114	539.76	5.92227	0.562492	0.223437	12.4859	0.228401	3.53253	3.84174	0.114754	13.1784	76.5443	86.6225	109.141	16.4439	0.339794	0.00416089	0.0107873
JP1	1.67889	1	-0.000203919	-0.000296172	0.00404233	0.00694885	0.025448	2.17757	0.000228091	0.000124814	0.00801269	6.22181e-05	0.00197561	0.00283719	0.000361848	0.00558119	0.0419195	0.0664188	0.0517666	0.0758887	0.000432504	4.03032e-06	-9.69797e-06	9.49645e-05	107		7.19907	37	0.00695643	-0.00012887	0.919249	0.0377156	531.67	5.8221	0.323711	0.123478	10.862	0.0425826	2.94651	4.87184	0.161506	16.1577	73.0528	82.8936	97.8017	15.03	0.260019	0.00419281	-0.0042923
JP1	1.55974	1	0.000432978	0.0034528	0.00519664	0.00462852	0.023567	2.05335	0.000251816	5.40382e-05	0.00871132	0.000257014	0.00186341	0.00209818	0.000281555	0.00479778	0.0367355	0.059381	0.0481671	0.0635986	0.000480904	3.86851e-06	2.35737e-05	5.82694e-05	108		6.68814	37	-0.0147705	0.00150237	1.18175	0.0251218	492.373	5.49	0.357382	0.0534599	11.8091	0.175903	2.77917	3.60287	0.125668	13.8897	64.0187	74.1102	91.0012	12.5959	0.289116	0.00402448	0.0104337
JP1	1.65225	1	-0.000716829	0.0205634	0.00558541	0.00499747	0.0202989	2.12506	0.000294804	0.000192155	0.00837294	0.000334237	0.00213386	0.00288805	8.72521e-05	0.00558133	0.0367405	0.0580615	0.0478571	0.0618585	0.000395827	-3.00438e-05	-9.63904e-06	2.62883e-05	109		7.08485	37	0.0244536	0.00894749	1.27016	0.0271243	424.095	5.68171	0.418392	0.190098	11.3504	0.228755	3.18253	4.95917	0.0389438	16.1581	64.0275	72.4634	90.4156	12.2512	0.237968	-0.031255	-0.00426622
JP1	1.68233	1	-0.000569955	0.0448596	0.00441994	0.00504815	0.018952	2.1206	0.000557754	0.000188954	0.00937288	0.000127775	0.00146215	0.0025386	0.000186246	0.0047849	0.0333385	0.0531529	0.0412725	0.0560579	0.000288786	0.000171351	-9.47849e-06	2.58504e-05	110		7.2138	37	0.0194432	0.0195192	1.00512	0.0273994	395.954	5.6698	0.791574	0.186932	12.7059	0.0874503	2.18071	4.35912	0.0831285	13.8524	58.0987	66.3372	77.9754	11.1024	0.173616	0.17826	-0.00419516
JP1	1.78699	1	0.000401922	0.067497	0.00469504	0.00528227	0.0160914	2.10181	0.000352352	2.127e-05	0.00915534	0.000159221	0.00197264	0.00260572	0.000316133	0.00396377	0.0308605	0.0474943	0.0381608	0.0519346	0.000450437	0.000202247	2.37008e-05	-7.53565e-06	111		7.66259	37	-0.013711	0.0293691	1.06768	0.0286701	336.188	5.61954	0.500065	0.0210423	12.411	0.108972	2.94208	4.47438	0.141102	11.4752	53.7804	59.275	72.0964	10.2858	0.2708	0.210401	0.0104899
JP1	1.62233	1	-0.00116641	0.0776117	0.00511377	0.0054711	0.0223272	2.11185	0.000719057	0.000220563	0.00899479	2.70974e-05	0.00171544	0.00265002	0.000284278	0.00451186	0.0298926	0.0449933	0.0359561	0.0480937	0.000319554	0.000203108	-9.39864e-06	5.88331e-05	112		6.95654	37	0.0397906	0.0337702	1.1629	0.029695	466.47	5.64639	1.0205	0.218202	12.1934	0.0185457	2.55847	4.55044	0.126884	13.0619	52.0937	56.1537	67.9312	9.52508	0.192114	0.211297	-0.00415982
JP1	1.54986	1	-0.00066932	0.0666837	0.00537786	0.00603816	0.0188691	2.05873	0.000522903	8.82759e-05	0.00911431	6.06513e-05	0.00175889	0.00313308	0.000352735	0.00383668	0.028493	0.045022	0.034759	0.0447259	0.000288032	0.000337879	2.39413e-05	9.2573e-05	113		6.64578	37	0.0228329	0.0290152	1.22296	0.0327728	394.222	5.50437	0.742113	0.0873312	12.3554	0.0415103	2.62328	5.37993	0.157439	11.1073	49.6545	56.1895	65.6694	8.85808	0.173163	0.351502	0.0105964
JP1	1.6127	1	0.000137604	0.0505304	0.00532785	0.00505089	0.0172474	2.08304	0.000491054	0.000155556	0.00820443	9.43435e-05	0.00142944	0.00264048	0.000186347	0.00438515	0.02697	0.0418317	0.0305985	0.0427517	0.000355944	7.09424e-05	2.4017e-05	2.58644e-05	114		6.91523	37	-0.00469416	0.0219867	1.21158	0.0274142	360.34	5.56938	0.696914	0.153891	11.122	0.0645696	2.13193	4.53406	0.0831735	12.6951	47.0004	52.2078	57.8091	8.46708	0.213991	0.0738026	0.0106298
JP1	1.64764	1	0.00147647	0.0362686	0.00483617	0.00605469	0.0182157	2.13218	0.000396997	0.000192176	0.0096689	6.18468e-05	0.00189572	0.00285431	0.000325635	0.00398075	0.0273468	0.0447459	0.0344184	0.0435936	0.000259657	3.80596e-05	-9.6401e-06	2.62912e-05	115		7.06506	37	-0.0503676	0.0157811	1.09977	0.0328624	380.571	5.70076	0.563425	0.190119	13.1072	0.0423285	2.82735	4.90124	0.145343	11.5244	47.6572	55.8449	65.0261	8.63383	0.156104	0.039594	-0.00426668
JP1	1.66791	1	-0.0016927	0.0279606	0.00584773	0.00535709	0.0175668	2.19326	0.000160186	5.65139e-05	0.0090413	0.000268789	0.00184562	0.00353581	0.000328843	0.00446702	0.0264088	0.0412134	0.0320655	0.0424374	0.000537325	3.84345e-05	-9.73506e-06	6.09389e-05	116		7.15198	37	0.0577442	0.0121662	1.32981	0.0290762	367.012	5.86407	0.227339	0.0559091	12.2564	0.183961	2.75263	6.07148	0.146775	12.9321	46.0225	51.4362	60.5808	8.40484	0.323036	0.0399841	-0.00430871
JP1	1.67515	1	0.00197612	0.0169298	0.0042807	0.00564628	0.0170848	2.14714	0.00025023	0.000184399	0.00934328	0.000124694	0.00191703	0.00244472	0.000247106	0.00408106	0.0265679	0.0389627	0.028238	0.0406828	0.000477875	3.65194e-05	-9.24997e-06	2.52272e-05	117		7.18303	37	-0.0674124	0.00736646	0.973456	0.0306458	356.944	5.74075	0.355131	0.182425	12.6658	0.0853419	2.85913	4.19792	0.110293	11.8147	46.2997	48.6272	53.3495	8.05734	0.287295	0.0379917	-0.00409401
JP1	1.56366	1	0.000165394	0.0103255	0.00523692	0.00581132	0.016931	2.034	0.000247503	0.00015007	0.00781783	0.000123336	0.00202542	0.00248272	0.000341372	0.0043921	0.0259542	0.0367529	0.0287086	0.0386847	0.000311072	6.84407e-05	-9.14919e-06	5.72715e-05	118		6.70495	37	-0.00564217	0.0044928	1.19091	0.0315415	353.73	5.43824	0.351261	0.148464	10.5979	0.0844121	3.02079	4.26318	0.152367	12.7152	45.2303	45.8693	54.2385	7.66161	0.187015	0.0712	-0.00404941
JP1	1.60109	1	-0.000776446	0.0081636	0.00503468	0.0056727	0.0179731	1.99059	0.000150307	0.000117564	0.00796707	9.0872e-05	0.00205447	0.00322094	0.00017949	0.00444999	0.0251037	0.0369214	0.0283393	0.0362625	0.000246043	6.8332e-05	-9.13466e-06	2.49127e-05	119		6.86546	37	0.0264874	0.00355212	1.14491	0.0307892	375.503	5.32218	0.213318	0.116306	10.8002	0.0621936	3.06412	5.5308	0.080113	12.8828	43.7481	46.0795	53.5409	7.1819	0.147919	0.0710869	-0.00404298
JP1	1.66285	1	0.000784889	0.00548686	0.00588164	0.00614361	0.020586	2.18867	0.000224986	-1.20506e-05	0.00800497	0.000365493	0.00171218	0.00246031	0.000255547	0.00442321	0.0268992	0.0356108	0.0288977	0.0396341	0.000325242	3.77668e-05	-9.56593e-06	5.98803e-05	120		7.13029	37	-0.0267754	0.00238743	1.33752	0.0333451	430.091	5.8518	0.319304	-0.0119216	10.8516	0.250147	2.55361	4.22469	0.11406	12.8053	46.8772	44.4439	54.596	7.84964	0.195533	0.0392894	-0.00423386
JP1	1.61292	1	-0.000610537	0.00314654	0.00507957	0.00625723	0.0205583	2.12224	0.000123854	8.94986e-05	0.00822415	0.000230779	0.00279932	0.0023297	0.000154475	0.00392402	0.0230814	0.0334714	0.0292598	0.0354027	0.000258164	3.98325e-06	2.42729e-05	5.99977e-05	121		6.9162	37	0.0208276	0.00136911	1.15512	0.0339617	429.512	5.67419	0.175776	0.0885408	11.1487	0.157947	4.17502	4.00042	0.068948	11.3601	40.2238	41.7739	55.28	7.01161	0.155207	0.00414384	0.0107431
JP1	1.76877	1	-0.000201624	0.00256868	0.00555629	0.0065993	0.0206013	2.05675	0.000157779	2.17927e-05	0.00653271	0.000129262	0.00252954	0.00263589	0.000222286	0.00392569	0.0248231	0.032432	0.0268261	0.0370133	0.000292147	7.17291e-05	-9.58879e-06	2.61512e-05	122		7.58445	37	0.00687811	0.00111767	1.26353	0.0358184	430.411	5.49907	0.223923	0.0215595	8.85577	0.0884679	3.77266	4.52618	0.0992141	11.365	43.2591	40.4766	50.682	7.33058	0.175637	0.074621	-0.00424397
JP1	1.64687	1	-0.00170795	-0.000396714	0.00496572	0.00478693	0.0232115	2.0916	0.000192419	-1.21277e-05	0.00720535	0.000299818	0.00325383	0.00251041	0.000257183	0.00400943	0.0237292	0.0329713	0.0283322	0.0362752	0.000293316	-3.00068e-05	-9.62718e-06	2.62559e-05	123		7.06176	37	0.0582644	-0.000172617	1.12923	0.0259815	484.946	5.59226	0.273084	-0.011998	9.7676	0.205198	4.85289	4.31071	0.11479	11.6074	41.3527	41.1497	53.5275	7.18441	0.17634	-0.0312166	-0.00426097
JP1	1.55841	1	-0.00131312	-0.000118206	0.00516705	0.00561702	0.0226442	2.10859	0.000184992	5.37305e-05	0.00712373	0.00019016	0.00227784	0.0024789	0.000279951	0.00414893	0.0243869	0.0316987	0.0238609	0.0352357	0.00018391	3.84648e-06	2.34395e-05	2.52425e-05	124		6.68243	37	0.0447951	-5.14334e-05	1.17502	0.0304869	473.093	5.63769	0.262543	0.0531555	9.65697	0.130147	3.39726	4.25661	0.124953	12.0112	42.4989	39.5614	45.08	6.97852	0.110565	0.00400156	0.0103743
JP1	1.60848	1	-0.00217491	0.00287106	0.00460019	0.00591228	0.0231197	2.18688	0.000123728	8.94073e-05	0.00902819	0.00029819	0.00262735	0.00368059	0.000221964	0.00500269	0.022956	0.0298734	0.024379	0.0335706	0.000156432	-2.98439e-05	-9.57491e-06	0.000127583	125		6.89714	37	0.074194	0.00124925	1.04611	0.0320895	483.027	5.84699	0.175597	0.0884504	12.2387	0.204084	3.91853	6.32007	0.0990706	14.4829	40.0053	37.2833	46.0589	6.64875	0.0940457	-0.0310471	-0.00423783
JP1	1.59261	1	-0.000233411	0.00126066	0.00425746	0.00582647	0.0214332	2.1835	0.000156158	0.000122141	0.0104248	0.000161457	0.00226854	0.0034469	0.000119429	0.00465674	0.0211063	0.0284322	0.0234239	0.0341135	0.000490288	0.000104516	2.40337e-05	2.58825e-05	126		6.82908	37	0.00796248	0.000548533	0.968171	0.0316238	447.791	5.83797	0.221622	0.120834	14.1318	0.110503	3.38339	5.91879	0.0533056	13.4813	36.7819	35.4846	44.2544	6.75628	0.294758	0.10873	0.0106373
JP1	1.61244	1	-0.00173537	0.00273908	0.0050818	0.00558185	0.0225407	2.07014	0.000123908	0.000157283	0.0108044	0.000400243	0.00276667	0.00358434	0.000222288	0.00453544	0.0225821	0.0290336	0.0246524	0.0360293	0.000461512	0.000173347	-9.58889e-06	6.0024e-05	127		6.91412	37	0.0591998	0.00119182	1.15563	0.030296	470.93	5.53487	0.175853	0.155599	14.6465	0.27393	4.12633	6.15481	0.0992152	13.1302	39.3536	36.2352	46.5754	7.13571	0.277458	0.180336	-0.00424402
JP1	1.53603	1	-0.00265421	0.00824255	0.00455085	0.00753791	0.019577	1.98701	0.000180042	0.000211394	0.0112012	0.000248713	0.00186687	0.00327172	0.000399742	0.0049292	0.0199701	0.0237638	0.0233183	0.0358235	0.00027445	0.000321946	5.46326e-05	0.000247309	128		6.5865	37	0.0905446	0.00358647	1.03489	0.0409128	409.012	5.31261	0.255519	0.209132	15.1844	0.170221	2.78432	5.61799	0.178419	14.2701	34.8017	29.6583	44.0547	7.09494	0.164997	0.334926	0.0241802
JP1	1.6196	1	-0.00198599	0.0164612	0.00473123	0.00842221	0.0199348	2.09015	0.000183332	5.32486e-05	0.0134825	0.000253258	0.00199819	0.0030399	0.000245039	0.00456566	0.0196206	0.0262777	0.0219902	0.0314783	0.000797895	0.000295428	2.32292e-05	0.000284231	129		6.94484	37	0.0677493	0.00716257	1.07591	0.0457124	416.487	5.58838	0.260189	0.0526787	18.277	0.173332	2.98019	5.21993	0.10937	13.2177	34.1927	32.7958	41.5457	6.23436	0.479689	0.307339	0.0102812
JP1	1.69447	1	-0.00171022	0.0267701	0.00474076	0.00867686	0.0188615	2.22091	0.000556072	0.000388674	0.0148262	0.000260916	0.00165803	0.00363254	0.000152303	0.00483724	0.0203811	0.0253985	0.022153	0.0315604	0.00038806	0.000237598	5.73131e-05	9.25355e-05	130		7.26588	37	0.0583418	0.0116481	1.07808	0.0470946	394.063	5.93799	0.789188	0.384514	20.0985	0.178573	2.47286	6.23756	0.0679785	14.0039	35.518	31.6984	41.8533	6.25063	0.233299	0.247177	0.0253666
JP1	1.61831	1	-0.000660004	0.0316382	0.00437997	0.0100776	0.0175817	2.10232	0.000581485	0.000185838	0.0152195	0.000356179	0.00180027	0.00328706	0.000281965	0.00447514	0.0203364	0.0238331	0.0216553	0.0307379	0.00110728	0.000629548	-9.32216e-06	9.12845e-05	131		6.9393	37	0.0225151	0.0137663	0.99603	0.0546974	367.325	5.62092	0.825254	0.183849	20.6316	0.243772	2.68499	5.64432	0.125851	12.9556	35.4401	29.7447	40.9129	6.08774	0.665689	0.65493	-0.00412596
JP1	1.64289	1	-0.000130525	0.0365352	0.00480112	0.00897072	0.0192051	2.05068	0.000518395	0.000253051	0.0151688	0.000424307	0.0016113	0.00294054	0.000349694	0.00509544	0.0203463	0.0232308	0.0205771	0.0306379	0.000782156	0.000235645	0.000156163	0.000124882	132		7.0447	37	0.00445268	0.0158971	1.0918	0.0486895	401.241	5.48284	0.735715	0.250342	20.5629	0.290399	2.40315	5.04931	0.156081	14.7514	35.4574	28.993	38.876	6.06792	0.470227	0.245145	0.0691176
JP1	1.56603	1	-0.000311128	0.0351841	0.00345919	0.00916321	0.0169223	2.00242	0.000799695	0.000394061	0.0162156	0.000368279	0.00170389	0.00370327	0.000298038	0.00517122	0.0190604	0.0223073	0.0184031	0.0271255	0.000580492	0.000221838	5.35116e-05	8.63978e-05	133		6.71511	37	0.0106137	0.0153092	0.78664	0.0497343	353.547	5.35383	1.13494	0.389844	21.9819	0.252054	2.54126	6.35902	0.133025	14.9708	33.2164	27.8405	34.7687	5.37228	0.348988	0.230782	0.0236841
JP1	1.69141	1	0.000840143	0.0349662	0.00541095	0.00809559	0.01815	2.05021	0.000629226	0.000276662	0.0178077	0.000218175	0.00190992	0.00405928	8.20217e-05	0.00559917	0.0199918	0.0222675	0.0175845	0.0295568	0.000788209	0.0001318	5.49557e-05	0.00028078	134		7.25277	37	-0.0286603	0.0152144	1.23048	0.0439396	379.198	5.4816	0.893009	0.273701	24.1402	0.149321	2.84853	6.97034	0.0366093	16.2097	34.8397	27.7908	33.2222	5.85381	0.473866	0.137113	0.0243233
JP1	1.54328	1	0.000593419	0.0331865	0.00414019	0.00840226	0.0171465	1.97868	0.00054555	0.000236144	0.0144955	0.000303273	0.00153454	0.00308392	0.000140959	0.00509516	0.0183057	0.0228249	0.0173755	0.0271364	0.000699004	0.000343482	5.30443e-05	0.000209224	135		6.61759	37	-0.0202437	0.01444	0.941503	0.0456041	358.231	5.29036	0.774255	0.233617	19.6502	0.207562	2.28867	5.29551	0.0629153	14.7506	31.9012	28.4865	32.8272	5.37443	0.420236	0.35733	0.0234773
JP1	1.61456	1	-0.00172977	0.0259888	0.00539926	0.00801093	0.016651	2.06926	0.000684127	0.00018689	0.0175285	0.000225729	0.00144618	0.00323943	0.000250445	0.00632322	0.0202856	0.0238021	0.0188901	0.028623	0.000914848	0.000335063	0.000123092	0.000158035	136		6.9232	37	0.0590086	0.0113082	1.22782	0.0434801	347.88	5.53253	0.970926	0.18489	23.7617	0.154491	2.15689	5.56255	0.111783	18.3058	35.3516	29.7061	35.6888	5.66886	0.550001	0.348571	0.0544801
JP1	1.52808	1	-0.00320301	0.0253841	0.00450123	0.00830942	0.0170465	2.01959	0.000284452	0.000218261	0.0180478	0.00015823	0.00136899	0.00360798	5.13342e-05	0.00522107	0.0199929	0.0208466	0.0179501	0.0265534	0.00057905	6.9573e-05	5.64073e-05	5.82191e-05	137		6.55239	37	0.109266	0.011045	1.02361	0.0451002	356.143	5.39974	0.4037	0.215925	24.4656	0.108294	2.04177	6.19539	0.0229123	15.1151	34.8415	26.0175	33.9128	5.25898	0.348121	0.072378	0.0249657
JP1	1.56193	1	0.000804534	0.0202477	0.0058772	0.00809596	0.0162566	2.04424	0.000187813	0.000120938	0.0156407	0.000259448	0.00174829	0.00351252	0.000151447	0.00507558	0.0208652	0.0210287	0.0200985	0.0260301	0.000419071	7.02927e-05	-9.39676e-06	0.000125209	138		6.69754	37	-0.0274456	0.00881011	1.33651	0.0439417	339.64	5.46563	0.266548	0.119643	21.2026	0.177569	2.60747	6.03148	0.0675961	14.6939	36.3617	26.2448	37.9718	5.15533	0.251943	0.0731266	-0.00415898
JP1	1.55668	1	-0.00148777	0.0149666	0.0057553	0.00750596	0.0198129	2.20651	0.00043611	5.66196e-05	0.0159233	0.000303745	0.0021936	0.00374915	0.000260552	0.00544075	0.0194122	0.0224829	0.0197217	0.0263965	0.00043497	0.000210772	2.46998e-05	0.000129959	139		6.67504	37	0.0507533	0.00651222	1.30879	0.0407393	413.939	5.8995	0.618936	0.0560137	21.5857	0.207885	3.27162	6.43779	0.116294	15.7511	33.8296	28.0596	37.2598	5.22789	0.261501	0.21927	0.0109321
JP1	1.69395	1	0.000664019	0.0173191	0.00501337	0.00808577	0.0181105	2.13441	0.000230175	2.22422e-05	0.015493	9.73575e-05	0.00185538	0.00393481	0.000226871	0.00528614	0.0208991	0.0205497	0.0181608	0.0276292	0.000713023	-3.05037e-05	5.9355e-05	6.12615e-05	140		7.26365	37	-0.0226521	0.00753584	1.14007	0.0438864	378.373	5.70672	0.326669	0.0220042	21.0024	0.0666323	2.7672	6.7566	0.101261	15.3035	36.4207	25.647	34.3108	5.47204	0.428665	-0.0317335	0.0262704
JP1	1.66628	1	-0.000499611	0.0100623	0.00489269	0.00758377	0.0177014	2.07283	0.000354698	0.00015453	0.0136145	0.000127001	0.00151985	0.00395425	0.000218398	0.00572169	0.0190849	0.0188484	0.0160821	0.0231981	0.000553274	3.91525e-06	9.04179e-05	0.000225372	141		7.14501	37	0.0170435	0.00437826	1.11263	0.0411617	369.825	5.54208	0.503393	0.152876	18.4559	0.0869207	2.26677	6.78999	0.0974789	16.5644	33.2591	23.5237	30.3836	4.59446	0.332625	0.00407311	0.0400187
JP1	1.57046	1	-0.00127695	0.00681591	0.00508831	0.00772748	0.0206926	2.09525	0.000155905	8.84731e-05	0.0121168	0.000161196	0.00179629	0.00404376	0.000119236	0.00498389	0.018087	0.0172457	0.0159058	0.0225932	0.000556433	3.74073e-05	-9.47487e-06	2.58405e-05	142		6.73414	37	0.0435614	0.00296572	1.15711	0.0419417	432.318	5.60201	0.221263	0.0875263	16.4256	0.110324	2.67906	6.9437	0.0532192	14.4285	31.5201	21.5234	30.0506	4.47465	0.334524	0.0389154	-0.00419355
JP1	1.66661	1	0.00179631	0.00728925	0.00575888	0.00629906	0.0229772	2.12173	0.000228168	0.000124856	0.0112055	0.000130778	0.00163359	0.00321511	0.00039624	0.00527432	0.0181069	0.0173487	0.0157023	0.0228243	0.000227035	3.83011e-05	2.45681e-05	9.49967e-05	143		7.14641	37	-0.0612788	0.00317168	1.3096	0.0341888	480.05	5.67282	0.323821	0.12352	15.1903	0.0895056	2.43641	5.52079	0.176856	15.2693	31.5548	21.6519	29.666	4.52042	0.136492	0.0398452	0.0108738
JP1	1.69272	1	-6.50041e-05	0.00634214	0.00447402	0.00672175	0.0215732	2.16369	0.000156686	8.89163e-05	0.011605	9.47286e-05	0.00187256	0.00315581	0.000422569	0.00410031	0.0174359	0.0189837	0.0156485	0.0209553	0.000290122	-2.968e-05	2.4115e-05	2.597e-05	144		7.25836	37	0.00221753	0.00275957	1.01742	0.036483	450.718	5.78499	0.222371	0.0879647	15.7318	0.0648331	2.79281	5.41896	0.188608	11.8705	30.3854	23.6925	29.5644	4.15025	0.174419	-0.0308766	0.0106732
JP1	1.6968	1	0.000319565	0.00793201	0.00468663	0.00730409	0.0220787	2.23664	9.2961e-05	9.24466e-05	0.0119609	9.84898e-05	0.00159718	0.00412046	0.000299455	0.00464781	0.0183034	0.0187911	0.0165149	0.0246585	0.000371587	3.90873e-05	2.50725e-05	0.000166893	145		7.27585	37	-0.0109015	0.00345135	1.06577	0.0396437	461.277	5.98005	0.131932	0.0914573	16.2142	0.0674073	2.3821	7.0754	0.133658	13.4555	31.8972	23.4521	31.2014	4.88369	0.223395	0.0406632	0.011097
JP1	1.65954	1	-0.00120092	0.00412432	0.00418655	0.00717245	0.0215106	2.10738	0.000188003	5.46051e-05	0.00970051	0.000193256	0.00165037	0.00331671	0.000218054	0.0043826	0.0175895	0.0169544	0.0142595	0.0195355	0.000319813	3.71364e-05	5.70483e-05	-7.57387e-06	146		7.1161	37	0.0409676	0.00179456	0.952047	0.0389292	449.409	5.63444	0.266817	0.0540207	13.1501	0.132266	2.46143	5.69524	0.0973255	12.6877	30.6531	21.1598	26.9403	3.86907	0.192269	0.0386336	0.0252494
JP1	1.54545	1	-0.000191985	0.000823887	0.00580738	0.00696212	0.0216574	2.04295	2.12253e-05	2.07509e-05	0.0106107	5.8577e-05	0.00169873	0.00331621	0.000276165	0.00415732	0.0152966	0.0170713	0.0147135	0.0206418	0.000278181	3.79446e-06	-9.13042e-06	2.49011e-05	147		6.62688	37	0.00654932	0.000358488	1.32063	0.0377876	452.477	5.46219	0.0301233	0.0205289	14.3839	0.0400906	2.53356	5.69438	0.123263	12.0355	26.6572	21.3057	27.7979	4.08816	0.167241	0.00394744	-0.0040411
JP1	1.58518	1	-0.00190844	0.00179159	0.00553636	0.006348	0.0213335	2.04638	8.70533e-05	2.1071e-05	0.0106761	2.67301e-05	0.00195418	0.0035966	0.000214924	0.00409044	0.0165825	0.0158906	0.0155309	0.0205992	0.000413473	3.66033e-05	2.34791e-05	9.07859e-05	148		6.79723	37	0.065104	0.000779554	1.259	0.0344544	445.709	5.47136	0.123548	0.0208455	14.4726	0.0182943	2.91455	6.17586	0.0959285	11.8419	28.8982	19.8322	29.3423	4.07973	0.248577	0.0380791	0.0103918
JP1	1.63616	1	0.00134409	-0.000321729	0.00599972	0.0071927	0.0216383	2.16523	-4.4714e-05	5.47594e-05	0.00936104	0.00016048	0.00208821	0.00262633	0.000185349	0.00419505	0.0167712	0.0172025	0.0153678	0.0234273	0.000520643	3.92013e-06	-9.43282e-06	2.57259e-05	149		7.01583	37	-0.0458518	-0.00013999	1.36437	0.0390391	452.078	5.78913	-0.063459	0.0541733	12.6899	0.109834	3.11444	4.50977	0.0827279	12.1448	29.227	21.4695	29.034	4.63984	0.313007	0.00407818	-0.00417494
JP1	1.69278	1	-0.000847501	0.00171324	0.00466493	0.00668706	0.02426	2.10594	2.22447e-05	0.000123154	0.0118988	0.000128994	0.00205074	0.0038135	0.000323232	0.00516859	0.0164714	0.0163671	0.0168764	0.0212607	0.000392948	-2.98253e-05	-9.56895e-06	9.37012e-05	150		7.25861	37	0.0289113	0.000745461	1.06083	0.0362947	506.85	5.63059	0.0315701	0.121836	16.13	0.0882849	3.05856	6.54831	0.14427	14.9632	28.7045	20.4269	31.8842	4.21074	0.236238	-0.0310278	-0.00423519
JP1	1.55362	1	-0.00125326	0.000592176	0.00489712	0.00674753	0.0232897	1.93743	8.5063e-05	8.45924e-05	0.0115213	0.000154125	0.00158949	0.00351437	0.000306015	0.00338857	0.0158187	0.0170343	0.0142462	0.0203846	0.000468023	3.76489e-06	-9.05926e-06	8.87102e-05	151		6.66189	37	0.0427533	0.000257666	1.11363	0.0366229	486.579	5.18006	0.120723	0.083687	15.6184	0.105485	2.37063	6.03466	0.136586	9.80997	27.5671	21.2595	26.915	4.03722	0.281372	0.00391668	-0.00400961
JP1	1.59762	1	-0.00132077	0.00212983	0.00480189	0.00644001	0.0280334	2.1061	5.45274e-05	8.69295e-05	0.0116752	0.000158383	0.0020938	0.00334838	0.000215813	0.00463385	0.014839	0.0151657	0.0142116	0.0218699	0.000480954	6.96403e-05	-9.30956e-06	5.82754e-05	152		6.85059	37	0.0450563	0.000926726	1.09198	0.0349538	585.685	5.63102	0.0773863	0.0859992	15.827	0.108399	3.12279	5.74963	0.096325	13.4151	25.8598	18.9275	26.8497	4.33139	0.289146	0.072448	-0.00412039
JP1	1.58929	1	-0.000929088	0.00180922	0.00569003	0.00621167	0.0265627	2.07311	5.48371e-05	2.12782e-05	0.0121387	0.000324645	0.00194033	0.00220953	0.000150893	0.00396531	0.0146584	0.0156163	0.0147894	0.0200735	0.000682119	3.89088e-06	5.67825e-05	5.86063e-05	153		6.81485	37	0.0316946	0.000787221	1.29395	0.0337145	554.961	5.54282	0.0778258	0.0210505	16.4553	0.22219	2.89389	3.79407	0.0673491	11.4796	25.545	19.4899	27.9413	3.97562	0.410086	0.00404775	0.0251318
JP1	1.67312	1	0.00203352	0.00427211	0.00522748	0.00674252	0.0288623	2.13175	0.00025331	5.43589e-05	0.0134656	0.000159307	0.0019737	0.00277251	0.000183993	0.0032048	0.0156545	0.0153203	0.0138969	0.0177916	0.000549913	0.000169279	2.37136e-05	2.55378e-05	154		7.17434	37	-0.0693707	0.00185887	1.18876	0.0365957	603.005	5.69959	0.359503	0.0537772	18.2541	0.109031	2.94366	4.76079	0.082123	9.27795	27.2811	19.1204	26.2551	3.52368	0.330604	0.176104	0.0104956
JP1	1.72	1	0.00226942	0.0144995	0.00500916	0.00745757	0.0308174	2.07249	0.000223794	0.000290524	0.0128417	0.000464394	0.00156866	0.00221199	0.000254193	0.00413088	0.0156045	0.0154672	0.0127079	0.0159597	0.00062603	0.000306465	9.13217e-05	-7.66163e-06	155		7.37534	37	-0.0774182	0.00630898	1.13911	0.0404767	643.851	5.54117	0.317612	0.287415	17.4083	0.317835	2.33956	3.79829	0.113456	11.959	27.1939	19.3038	24.0087	3.16086	0.376365	0.318821	0.0404188
JP1	1.71794	1	-6.306e-05	0.0193773	0.00499349	0.00730518	0.0316259	2.01745	0.000152	0.000216782	0.0115849	0.000255052	0.00227339	0.00214743	0.000442562	0.0032921	0.0133188	0.013022	0.0117816	0.015396	0.000607758	0.000101733	-9.23754e-06	9.04559e-05	156		7.36653	37	0.00215121	0.00843139	1.13555	0.0396496	660.742	5.39402	0.215721	0.214462	15.7045	0.17456	3.39064	3.68743	0.197532	9.53068	23.2105	16.252	22.2587	3.04922	0.36538	0.105834	-0.00408851
JP1	1.66717	1	-0.000836043	0.0309583	0.00439161	0.0079144	0.0310017	1.96966	0.000245471	0.000277053	0.0116042	0.00018643	0.00188057	0.00185299	0.000306514	0.00316972	0.0117028	0.0131768	0.0112839	0.0145783	0.00050084	0.000228147	2.29797e-05	5.68012e-05	157		7.14883	37	0.0285204	0.0134705	0.998677	0.0429562	647.701	5.26622	0.348377	0.274088	15.7308	0.127595	2.80476	3.18184	0.136808	9.17641	20.3944	16.4453	21.3185	2.88727	0.301102	0.237346	0.0101708
JP1	1.59415	1	0.00236978	0.0350987	0.00452126	0.00671527	0.0308017	1.9501	0.000356077	0.000263998	0.0106601	0.000269276	0.00179195	0.00167405	0.000169897	0.00243973	0.0116407	0.012464	0.0100183	0.0124851	0.000629957	0.00024794	-8.64647e-06	-6.96209e-06	158		6.83569	37	-0.0808419	0.0152721	1.02816	0.0364478	643.523	5.21394	0.505352	0.261173	14.4508	0.184295	2.67259	2.87457	0.0758315	7.06307	20.2861	15.5556	18.9273	2.47271	0.378726	0.257936	-0.00382691
JP1	1.73142	1	0.00185056	0.0407456	0.0045439	0.00715361	0.0325419	2.0464	0.000331668	0.00033121	0.010705	0.000336587	0.00188795	0.00214125	0.000390931	0.00267241	0.0124833	0.0128236	0.0103941	0.0128759	0.000641827	0.000159255	2.23095e-05	-7.09327e-06	159		7.4243	37	-0.0631293	0.0177291	1.03331	0.0388269	679.879	5.47141	0.470709	0.327665	14.5118	0.230363	2.81577	3.67682	0.174487	7.73669	21.7546	16.0044	19.6373	2.55012	0.385862	0.165676	0.00987412
JP1	1.72678	1	-0.000561498	0.0406944	0.00421931	0.00557058	0.0303755	1.86086	0.000343938	0.000461512	0.0105624	0.000378103	0.00155385	0.00155797	0.000105101	0.00247456	0.0103871	0.0123642	0.0111244	0.0126498	0.000372463	0.000446002	-8.35168e-06	8.17814e-05	160		7.40441	37	0.0191547	0.0177068	0.959496	0.0302349	634.619	4.97534	0.488123	0.456573	14.3185	0.258777	2.31747	2.67525	0.0469104	7.16391	18.1015	15.431	21.0171	2.50533	0.223923	0.463983	-0.00369643
JP1	1.64326	1	0.000788963	0.0445449	0.00408819	0.00639798	0.0326748	1.85716	0.000320367	0.000259808	0.00964803	0.000114709	0.00152304	0.001918	0.000107084	0.00252124	0.0113053	0.0119352	0.0101905	0.0123471	0.000499724	0.000244005	2.15494e-05	2.3207e-05	161		7.0463	37	-0.0269144	0.0193822	0.929679	0.0347257	682.657	4.96545	0.454671	0.257027	13.0789	0.0785078	2.27153	3.29347	0.0477954	7.29905	19.7017	14.8957	19.2527	2.44537	0.300431	0.253843	0.00953769
JP1	1.58614	1	0.000669367	0.0372651	0.00423673	0.00627826	0.0325166	1.82863	0.000278325	0.000335537	0.00976937	0.000196428	0.00212327	0.00172356	0.000160299	0.00235954	0.0110407	0.0119042	0.0102315	0.0148082	0.000363826	0.000233933	2.06599e-05	2.22491e-05	162		6.80134	37	-0.0228345	0.0162147	0.963457	0.0340759	679.351	4.88917	0.395005	0.331946	13.2434	0.134437	3.16674	2.95959	0.0715475	6.83091	19.2405	14.857	19.3303	2.93281	0.21873	0.243365	0.009144
JP1	1.63147	1	0.000215039	0.0367497	0.00494906	0.00584792	0.031489	1.98162	0.000140536	0.000471966	0.00992556	0.000175476	0.00180024	0.00168377	1.69708e-05	0.00259096	0.0119821	0.0124327	0.012887	0.0159259	0.000471411	0.000244912	-8.54086e-06	2.32933e-05	163		6.99572	37	-0.00733576	0.0159904	1.12545	0.0317402	657.882	5.29821	0.199451	0.466915	13.4551	0.120097	2.68495	2.89126	0.00757469	7.50087	20.8812	15.5166	24.3472	3.15417	0.283409	0.254786	-0.00378016
JP1	1.7793	1	0.00130974	0.0343736	0.00398906	0.00664372	0.0337059	2.06099	0.000174955	0.000267263	0.0101107	0.000272606	0.00156675	0.0019112	0.000171999	0.00237715	0.0124971	0.0148482	0.0114118	0.0167248	0.000359458	0.000189165	2.21677e-05	2.38729e-05	164		7.62961	37	-0.0446801	0.0149566	0.907136	0.0360595	704.198	5.51041	0.248299	0.264403	13.7061	0.186574	2.33671	3.28179	0.0767694	6.88188	21.7786	18.5312	21.5601	3.3124	0.216104	0.196791	0.00981139
JP1	1.77471	1	-0.000433842	0.0292972	0.00483423	0.00578828	0.0309332	1.99672	0.000268255	0.000391732	0.0105654	0.00024217	0.00153891	0.00163618	0.000110378	0.00272273	0.0123979	0.0155298	0.0152828	0.0219385	0.000731977	0.000127578	-8.77097e-06	5.4904e-05	165		7.60992	37	0.0147999	0.0127477	1.09933	0.0314165	646.271	5.33857	0.380713	0.38754	14.3225	0.165743	2.29519	2.80955	0.0492655	7.88235	21.6057	19.3819	28.8735	4.34497	0.44006	0.132721	-0.00388201
JP1	1.75103	1	-0.000377067	0.0219101	0.00377295	0.00644056	0.0330696	1.97271	0.00033511	0.000334648	0.0104071	0.000245755	0.00159313	0.00194338	1.7686e-05	0.00285768	0.0146915	0.0172089	0.0168636	0.0222947	0.000585605	6.65828e-05	-8.90082e-06	2.4275e-05	166		7.50842	37	0.0128631	0.00953346	0.85799	0.0349568	690.904	5.27439	0.475595	0.331066	14.1079	0.168197	2.37606	3.33706	0.00789393	8.27303	25.6028	21.4775	31.86	4.41553	0.352062	0.0692672	-0.00393948
JP1	1.75896	1	0.00087401	0.0137996	0.00432901	0.00711425	0.032433	2.04179	-1.09634e-05	0.000309214	0.00965008	5.82356e-05	0.00114373	0.00252732	8.21664e-05	0.00313876	0.0147255	0.0219531	0.0198649	0.0275212	0.000693404	0.000356487	-9.07721e-06	5.6821e-05	167		7.54241	37	-0.0298157	0.00600445	0.984442	0.0386133	677.604	5.45908	-0.0155594	0.305905	13.0817	0.039857	1.7058	4.33976	0.0366739	9.08678	25.662	27.3984	37.5304	5.45066	0.41687	0.370859	-0.00401755
JP1	1.92805	1	0.000514657	0.0117561	0.00552847	0.00636883	0.0328987	2.20531	0.000361407	8.9635e-05	0.00986569	0.000197222	0.00158251	0.00260487	0.000290348	0.00321757	0.0163541	0.0247457	0.0224012	0.0363061	0.000224649	0.000139626	-9.5993e-06	2.61799e-05	168		8.26748	37	-0.0175568	0.0051153	1.25721	0.0345675	687.333	5.89627	0.512916	0.0886757	13.374	0.13498	2.36023	4.47291	0.129593	9.31491	28.5001	30.8838	42.3221	7.19053	0.135057	0.145255	-0.00424863
JP1	1.83084	1	-0.00133935	0.00853765	0.00503651	0.0061631	0.0309445	2.22045	0.000155339	0.000121501	0.0102034	0.000360701	0.0021566	0.00309535	0.000285545	0.00379796	0.0168185	0.0260755	0.0262442	0.0393482	0.000320977	0.000137317	-9.44051e-06	-7.60145e-06	169		7.85061	37	0.0456901	0.00371488	1.14533	0.0334509	646.506	5.93676	0.22046	0.1202	13.8317	0.246867	3.21645	5.31514	0.127449	10.9952	29.3095	32.5434	49.5826	7.79302	0.192969	0.142853	-0.00417835
JP1	1.916	1	2.59658e-06	0.0139798	0.00452333	0.0064603	0.0301451	2.1938	0.000390596	0.000122069	0.00954685	6.08497e-05	0.00153011	0.00284179	0.00028688	0.00354769	0.0193815	0.0301969	0.0280472	0.04504	0.000355983	0.000204967	-9.48467e-06	0.00012638	170		8.2158	37	-8.85788e-05	0.00608286	1.02863	0.0350639	629.804	5.86551	0.554341	0.120763	12.9417	0.0416461	2.28207	4.87975	0.128045	10.2706	33.7761	37.6871	52.989	8.9203	0.214015	0.213231	-0.00419789
JP1	1.85879	1	-0.00033569	0.0105741	0.00423703	0.00880849	0.0280234	2.05099	0.000156642	8.88913e-05	0.00948084	0.000296469	0.00217468	0.00231389	0.000287939	0.00332538	0.0194867	0.0349321	0.0311532	0.051006	0.000155529	0.000172096	-9.51965e-06	5.95906e-05	171		7.97047	37	0.0114516	0.00460097	0.963525	0.047809	585.477	5.48368	0.222309	0.08794	12.8523	0.202906	3.24342	3.97327	0.128518	9.62704	33.9593	43.5968	58.8573	10.1019	0.093503	0.179034	-0.00421338
JP1	1.86127	1	-0.00178433	0.0101429	0.0048353	0.00650649	0.0308498	2.12898	0.000251869	8.6939e-05	0.0089105	0.000125511	0.00192959	0.00242785	0.000117168	0.00312079	0.0218608	0.0380287	0.0356191	0.0541741	0.000448117	0.000168316	2.35787e-05	2.53925e-05	172		7.98109	37	0.0608698	0.00441334	1.09958	0.0353147	644.527	5.69219	0.357457	0.0860085	12.0791	0.0859011	2.87786	4.16895	0.0522964	9.03474	38.0967	47.4615	67.2946	10.7293	0.269405	0.175102	0.0104359
JP1	1.91935	1	0.000749802	0.00813011	0.00438753	0.00657518	0.0281915	2.19009	0.000258447	0.000224203	0.0109676	0.000162538	0.00211497	0.0025925	0.000356466	0.00465414	0.0222623	0.0390897	0.0395999	0.0665605	0.000392323	0.000105215	-9.55373e-06	0.0001273	173		8.23016	37	-0.0255785	0.00353755	0.997749	0.0356874	588.99	5.85559	0.366793	0.221803	14.8678	0.111242	3.15436	4.45168	0.159104	13.4738	38.7965	48.7857	74.8154	13.1825	0.235862	0.109457	-0.00422846
JP1	2.01288	1	-0.00110393	0.0111215	0.00422828	0.00711054	0.0294775	2.28336	9.13771e-05	0.000297133	0.0103115	6.24347e-05	0.00194811	0.00257205	0.000191222	0.0041561	0.0234011	0.0483847	0.0474881	0.073426	0.000605894	0.000141552	-9.73172e-06	-7.83593e-06	174		8.6312	37	0.0376591	0.00483914	0.961536	0.0385932	615.857	6.10495	0.129684	0.293954	13.9783	0.0427308	2.9055	4.41655	0.0853493	12.032	40.7809	60.3863	89.7183	14.5422	0.36426	0.147259	-0.00430724
JP1	1.92218	1	0.00105045	0.00984988	0.00392933	0.00765329	0.0282239	2.18987	0.000190025	0.000223116	0.00967052	0.00016175	0.00163454	0.00294937	0.000321154	0.00389239	0.0248147	0.0484515	0.0481155	0.077096	0.000591931	0.00020546	-9.50744e-06	2.59294e-05	175		8.24229	37	-0.0358345	0.00428585	0.893552	0.041539	589.665	5.85501	0.269688	0.220728	13.1094	0.110703	2.43782	5.06447	0.143343	11.2685	43.2445	60.4696	90.9038	15.2691	0.355865	0.213743	-0.00420797
JP1	1.83126	1	-0.00161675	0.00775513	0.00415297	0.00594935	0.0296768	2.00162	0.000278719	0.000149478	0.00975261	0.000219424	0.00188866	0.002988	0.00024345	0.00392409	0.0244634	0.0495171	0.0471232	0.0759675	0.000502995	0.000100362	-9.11309e-06	5.70456e-05	176		7.85244	37	0.0551531	0.00337439	0.94441	0.0322907	620.021	5.35167	0.395563	0.147879	13.2207	0.150176	2.81682	5.1308	0.10866	11.3603	42.6322	61.7996	89.029	15.0456	0.302397	0.104409	-0.00403343
JP1	1.44779	1	-0.00174139	0.00719805	0.00357107	0.00469465	0.0241787	1.69173	0.000148561	0.000279457	0.00869072	0.000152712	0.00167172	0.00225329	0.000251077	0.0037785	0.0199793	0.0435306	0.041947	0.0675007	0.000331487	0.000265653	7.13363e-05	2.02715e-05	177		6.2081	37	0.0594051	0.003132	0.812082	0.0254807	505.152	4.52314	0.210841	0.276466	11.7812	0.104517	2.49328	3.86921	0.112065	10.9388	34.8178	54.3282	79.2497	13.3687	0.199288	0.276363	0.0315733
JP1	1.81158	1	-0.00106816	0.00463104	0.00532334	0.00668057	0.03187	2.10977	0.000387784	0.00012119	0.0107435	6.04117e-05	0.00205131	0.00275481	0.000417868	0.00388838	0.0276799	0.054076	0.0533082	0.0849455	0.000686052	3.91331e-06	5.71098e-05	-7.58203e-06	178		7.76804	37	0.0364389	0.00201505	1.21056	0.0362595	665.842	5.64083	0.550351	0.119893	14.5639	0.0413463	3.0594	4.73039	0.18651	11.2569	48.2375	67.4892	100.714	16.8237	0.41245	0.00407108	0.0252767
JP1	1.77426	1	-0.000340497	0.00450839	0.00525378	0.00760196	0.0319597	2.12241	0.000295322	0.000192492	0.0126902	0.000130167	0.00186473	0.00306366	0.000326171	0.00484038	0.0284182	0.056104	0.0533263	0.0894033	0.000805834	3.81222e-05	-9.65596e-06	2.63344e-05	179		7.60799	37	0.0116156	0.00196168	1.19474	0.0412604	667.717	5.67463	0.419127	0.190432	17.2029	0.0890877	2.78114	5.26073	0.145582	14.013	49.5242	70.0202	100.748	17.7066	0.484462	0.0396592	-0.00427371
JP1	1.78552	1	-0.000203433	0.0019728	0.0046482	0.00744559	0.0311623	2.14038	0.000159195	0.000500453	0.0144262	9.62457e-05	0.00193673	0.00337723	0.000292632	0.0050549	0.0268627	0.0615795	0.0570754	0.0907799	0.000636528	4.02071e-06	2.45012e-05	9.47379e-05	180		7.65631	37	0.00693983	0.000858398	1.05703	0.0404117	651.057	5.72267	0.225932	0.495097	19.5562	0.0658714	2.88851	5.79917	0.130612	14.634	46.8134	76.854	107.831	17.9792	0.382677	0.00418281	0.0108442
JP1	1.62343	1	-0.000263032	0.00127399	0.00547831	0.00672518	0.0293526	2.00591	0.000186674	0.000153196	0.013596	0.000125905	0.00219958	0.00302933	0.000150528	0.00408768	0.0270241	0.0577864	0.0554306	0.0902226	0.000581492	3.68739e-05	5.66451e-05	2.54721e-05	181		6.96123	37	0.00897298	0.000554335	1.2458	0.0365016	613.248	5.36314	0.264931	0.151557	18.4308	0.0861705	3.28054	5.20177	0.0671861	11.8339	47.0947	72.12	104.724	17.8688	0.349589	0.0383605	0.025071
JP1	1.63645	1	-0.000543626	0.00158328	0.00471671	0.00599864	0.0311077	2.08751	0.000158044	0.000191474	0.013948	0.000163408	0.00182093	0.00287781	0.000120872	0.00515406	0.0278933	0.0585387	0.0622979	0.0984456	0.000699784	3.99164e-06	-9.60488e-06	6.0124e-05	182		7.01709	37	0.0185451	0.000688912	1.07261	0.0325582	649.915	5.58133	0.224299	0.189425	18.9079	0.111838	2.71582	4.94159	0.0539495	14.9211	48.6094	73.0589	117.698	19.4974	0.420705	0.00415257	-0.00425109
JP1	1.59916	1	-0.00137348	-0.00048956	0.00540544	0.00673323	0.0282692	2.08217	0.000122031	0.00012154	0.0138809	0.000194023	0.00189044	0.00383027	0.000252279	0.0044	0.0301694	0.0619889	0.0623604	0.0970945	0.000521238	3.72838e-05	2.39156e-05	-7.60394e-06	183		6.85717	37	0.0468545	-0.000213016	1.22923	0.0365453	590.613	5.56704	0.173189	0.12024	18.817	0.132791	2.81948	6.57709	0.112601	12.7381	52.576	77.3649	117.816	19.2298	0.313365	0.038787	0.010585
JP1	1.70489	1	-0.00159294	0.000152549	0.00607001	0.00720062	0.0293209	2.26421	0.000195076	0.000229047	0.0159001	0.000235004	0.00198828	0.00295881	0.000226258	0.00527187	0.0290707	0.0679559	0.0656662	0.104059	0.000504233	7.30111e-05	5.91948e-05	6.10961e-05	184		7.31056	37	0.0543411	6.63766e-05	1.38036	0.0390821	612.586	6.05375	0.276856	0.226596	21.5543	0.160839	2.96541	5.08069	0.100987	15.2622	50.6613	84.812	124.062	20.6092	0.303141	0.0759547	0.0261994
JP1	1.65714	1	-0.000235963	0.00287678	0.00515229	0.00707804	0.0254819	2.16868	0.000327318	0.000292929	0.0129819	0.000129332	0.00215778	0.00345069	0.000222407	0.0054197	0.030616	0.0659115	0.0662893	0.101606	0.000902336	7.17682e-05	5.81871e-05	9.39466e-05	185		7.10582	37	0.00804955	0.00125174	1.17166	0.0384168	532.379	5.79834	0.464536	0.289794	17.5983	0.0885162	3.2182	5.92531	0.0992682	15.6901	53.3543	82.2605	125.239	20.1234	0.542478	0.0746617	0.0257535
JP1	1.6434	1	-0.0012239	0.00236606	0.0051746	0.00612269	0.0277249	1.98144	0.000351198	0.00025186	0.0135791	5.98454e-05	0.00216389	0.00279489	0.000348049	0.00381898	0.02904	0.0686668	0.0665769	0.104723	0.000547816	3.6828e-05	-9.32814e-06	2.54404e-05	186		7.04689	37	0.0417515	0.00102951	1.17673	0.0332315	579.24	5.29772	0.498427	0.249164	18.4078	0.0409588	3.22731	4.79921	0.155347	11.056	50.6078	85.6992	125.783	20.7407	0.329343	0.0383128	-0.00412861
JP1	1.70223	1	0.000612382	0.00539625	0.00491378	0.00672468	0.0305829	2.05709	0.00042597	0.000391823	0.0136995	6.11179e-05	0.00204164	0.00315719	0.000288145	0.00369794	0.0323927	0.0731118	0.0715876	0.116736	0.000694072	0.000104915	-9.52648e-06	5.96333e-05	187		7.29917	37	-0.0208906	0.002348	1.11742	0.0364989	638.951	5.49999	0.604544	0.38763	18.5711	0.0418297	3.04498	5.42133	0.12861	10.7056	56.4506	91.2468	135.249	23.1199	0.417272	0.109145	-0.0042164
JP1	1.66932	1	-0.00188882	0.00396429	0.00530557	0.00654076	0.0283142	2.09499	0.000189951	0.000189457	0.0137675	9.45435e-05	0.00190247	0.00298179	0.000220313	0.0045623	0.0329555	0.0775075	0.0763925	0.114734	0.000323126	0.000171808	9.1211e-05	2.59192e-05	188		7.15802	37	0.0644345	0.00172493	1.20652	0.0355006	591.553	5.60133	0.269582	0.18743	18.6633	0.0647064	2.83743	5.12014	0.098334	13.2079	57.4314	96.7329	144.327	22.7233	0.194262	0.178734	0.0403698
JP1	1.75305	1	0.00132477	0.00498607	0.00497788	0.00725334	0.0269615	2.15771	0.000610341	0.000333318	0.0133095	0.000166468	0.00182048	0.00341561	0.0001577	0.00497408	0.0342426	0.0796949	0.0734241	0.124181	0.000332682	7.31952e-05	-9.78477e-06	6.12501e-05	189		7.51707	37	-0.0451926	0.00216953	1.132	0.0393682	563.292	5.76902	0.866207	0.32975	18.0424	0.113932	2.71513	5.86507	0.0703873	14.4001	59.6743	99.4628	138.719	24.5944	0.200006	0.0761461	-0.00433071
JP1	1.70125	1	-0.000376763	0.00294668	0.00535264	0.00644331	0.0280363	2.20483	0.000468551	0.000399435	0.0119732	0.000233834	0.00160102	0.00253241	0.000499578	0.00380409	0.0316107	0.0836675	0.0777174	0.122561	0.000501722	0.000244176	-9.71156e-06	6.07918e-05	190		7.29493	37	0.0128528	0.00128215	1.21722	0.0349717	585.747	5.895	0.664977	0.39516	16.2309	0.160038	2.38783	4.3485	0.22298	11.0129	55.0877	104.421	146.83	24.2735	0.301632	0.254021	-0.00429831
JP1	1.6339	1	-0.00145398	0.00638241	0.00417507	0.00564959	0.0273815	2.0566	0.000392535	0.000257357	0.0110434	9.48223e-05	0.0026155	0.0034283	0.000321975	0.00363264	0.0341682	0.0773964	0.0749201	0.113276	0.000324079	7.13024e-05	2.41388e-05	-7.67491e-06	191		7.00615	37	0.0496005	0.0027771	0.949435	0.0306637	572.067	5.49867	0.557092	0.254603	14.9705	0.0648972	3.90087	5.88686	0.143709	10.5166	59.5447	96.5941	141.545	22.4347	0.194834	0.0741771	0.0106838
JP1	1.69802	1	-0.00357603	0.0080767	0.00458863	0.00614478	0.0280087	2.05265	0.000420871	0.000387133	0.0112048	0.000160134	0.00191745	0.00242083	0.000151699	0.00392	0.0322719	0.082869	0.0723731	0.11487	0.000320023	0.000336403	2.38367e-05	-7.57885e-06	192		7.2811	37	0.121991	0.00351431	1.04348	0.0333514	585.17	5.48813	0.597308	0.382989	15.1892	0.109597	2.85976	4.1569	0.0677089	11.3485	56.2401	103.424	136.733	22.7504	0.192396	0.349966	0.0105501
JP1	1.7778	1	0.00153127	0.0116526	0.00497054	0.00734619	0.026332	2.1816	0.000436874	0.000401853	0.00979954	-6.34438e-06	0.00216293	0.00316898	0.000261008	0.00372357	0.0350925	0.0880757	0.0750902	0.116876	0.000228651	0.000245654	-9.77035e-06	-7.86703e-06	193		7.62317	37	-0.0522373	0.00507024	1.13033	0.0398722	550.139	5.83289	0.62002	0.397552	13.2843	-0.00434215	3.22588	5.44158	0.116497	10.7798	61.1556	109.922	141.867	23.1476	0.137464	0.255558	-0.00432433
JP1	1.80683	1	-0.00117804	0.0160204	0.0049971	0.00784266	0.0229203	2.15175	0.000525037	0.000457481	0.00989022	2.73675e-05	0.00253763	0.00301175	0.000287112	0.00368468	0.0348683	0.0780911	0.0760643	0.113415	0.000456865	0.000238665	2.4039e-05	5.94196e-05	194		7.74767	37	0.0401873	0.00697077	1.13637	0.0425668	478.861	5.75308	0.745143	0.452585	13.4072	0.0187306	3.78472	5.17159	0.128149	10.6672	60.7647	97.4611	143.707	22.4622	0.274664	0.248287	0.0106396
JP1	1.90444	1	-0.000172455	0.0175855	0.00522423	0.00807449	0.0251671	2.22838	0.000510422	0.000370622	0.00880659	0.00020253	0.0019385	0.00302319	8.9231e-05	0.00351309	0.0339032	0.0842937	0.0809587	0.116483	0.000439626	0.00024785	-9.85765e-06	-7.93733e-06	195		8.16624	37	0.00588307	0.00765177	1.18802	0.0438251	525.802	5.95796	0.7244	0.366656	11.9382	0.138613	2.89116	5.19123	0.039827	10.1705	59.0829	105.202	152.954	23.0699	0.2643	0.257842	-0.00436297
JP1	1.80952	1	-0.00203036	0.0183667	0.00477069	0.00612198	0.0263389	2.11471	0.000618063	0.000319444	0.00824514	0.000126414	0.00270568	0.00284281	0.000349891	0.00261288	0.0317533	0.0778149	0.0750107	0.10951	0.000219458	0.00036828	2.37482e-05	5.87008e-05	196		7.75922	37	0.069263	0.00799168	1.08488	0.0332277	550.284	5.65404	0.877167	0.316026	11.1771	0.0865187	4.03537	4.8815	0.156169	7.56434	55.3363	97.1164	141.716	21.6888	0.131937	0.383128	0.0105109
JP1	1.73948	1	-0.00265167	0.0152427	0.00502028	0.00620411	0.0248717	2.00242	0.000246404	0.00047116	0.00826637	0.000154963	0.00191989	0.00221397	0.000178977	0.00311742	0.0326833	0.0775309	0.0706204	0.10666	0.000502744	0.000357717	2.30671e-05	2.48415e-05	197		7.45887	37	0.0904582	0.00663236	1.14164	0.0336734	519.63	5.35383	0.349701	0.466118	11.2059	0.106058	2.86341	3.80168	0.0798839	9.02499	56.957	96.762	133.422	21.1244	0.302246	0.372139	0.0102094
JP1	1.85997	1	7.2547e-05	0.0157225	0.00570856	0.0069116	0.0248586	2.16799	0.00029946	0.000298952	0.00836648	0.000270341	0.00209838	0.00289907	0.000261567	0.00310898	0.0354804	0.0877407	0.0770645	0.109052	0.000367491	0.000107831	-9.79127e-06	-7.88388e-06	198		7.97552	37	-0.00247484	0.00684114	1.29816	0.0375134	519.356	5.79651	0.425	0.295752	11.3416	0.185024	3.12962	4.9781	0.116747	9.00055	61.8314	109.504	145.597	21.5981	0.220933	0.112179	-0.00433359
JP1	1.89234	1	-0.00129747	0.0133328	0.00431886	0.00665968	0.0224254	2.17108	0.000430469	0.000327947	0.00873699	0.000299815	0.00216522	0.00169387	0.000223174	0.00336291	0.033281	0.0793714	0.0742294	0.108011	0.000293314	0.00027606	-9.6271e-06	6.02631e-05	199		8.11434	37	0.0442613	0.00580132	0.982133	0.0361461	468.522	5.80476	0.61093	0.324437	11.8439	0.205196	3.2293	2.90861	0.0996106	9.7357	57.9986	99.0591	140.24	21.3918	0.176338	0.28719	-0.00426093
JP1	1.83381	1	-0.00056376	0.0108478	0.00440501	0.00688369	0.0226381	2.12674	0.000518573	0.000253137	0.00884013	0.00025886	0.00227422	0.00290843	0.000416051	0.00304318	0.033608	0.0800701	0.0708535	0.105188	0.000252529	0.00013637	-9.37546e-06	-7.54907e-06	200		7.86336	37	0.0192319	0.00472006	1.00173	0.0373619	472.965	5.68622	0.735968	0.250428	11.9837	0.177166	3.39187	4.99417	0.185699	8.81007	58.5684	99.9311	133.862	20.8327	0.151819	0.141868	-0.00414956
JP1	1.82444	1	-0.000633539	0.00962848	0.00486052	0.00701862	0.0243925	2.11143	0.000288204	0.000387576	0.00935152	0.000193604	0.00218594	0.00272352	8.52985e-05	0.00305869	0.0323089	0.0808811	0.0724897	0.108202	0.000287102	0.000170352	-9.42322e-06	9.22742e-05	201		7.82319	37	0.0216123	0.00418952	1.10531	0.0380943	509.619	5.64528	0.409024	0.383428	12.677	0.132505	3.26021	4.67666	0.0380718	8.85495	56.3045	100.943	136.953	21.4296	0.172604	0.17722	-0.0041707
JP1	1.70732	1	-0.00202671	0.00696685	0.0048613	0.0068728	0.0232001	2.08328	0.000220157	0.000219671	0.00872662	9.312e-05	0.00233675	0.00250703	0.000382327	0.00389842	0.0362438	0.084783	0.069508	0.108315	0.000318261	3.69563e-05	-9.36063e-06	2.5529e-05	202		7.32097	37	0.0691383	0.0030314	1.10549	0.0373028	484.707	5.57	0.312451	0.21732	11.8298	0.0637322	3.48513	4.30492	0.170647	11.286	63.1618	105.813	131.32	21.452	0.191337	0.0384462	-0.00414299
JP1	1.73518	1	-0.00220644	0.0043978	0.00462174	0.00668071	0.0228967	2.13761	0.000447634	0.000348829	0.0104214	0.000157847	0.00228335	0.00291097	0.000313404	0.00445394	0.034114	0.0790392	0.0706125	0.107227	0.000577646	3.85579e-06	-9.278e-06	2.53036e-05	203		7.44044	37	0.0752698	0.00191356	1.05101	0.0362602	478.368	5.71527	0.63529	0.345096	14.1272	0.108032	3.40549	4.99853	0.139884	12.8943	59.4503	98.6444	133.407	21.2366	0.347277	0.00401125	-0.00410642
JP1	1.71247	1	-0.000639353	0.00542067	0.00571236	0.00667924	0.0240762	2.12822	0.000257256	0.000155984	0.0106144	0.000262567	0.00180289	0.00301726	0.000287638	0.00392691	0.0388449	0.0853193	0.0773217	0.109398	0.000659257	3.75448e-05	-9.5097e-06	0.000126714	204		7.34306	37	0.0218107	0.00235863	1.29902	0.0362523	503.01	5.69018	0.365103	0.154314	14.389	0.179703	2.68891	5.18104	0.128383	11.3685	67.6948	106.482	146.083	21.6665	0.396341	0.0390585	-0.00420897
JP1	1.65016	1	0.000501781	0.00407027	0.00552273	0.00716958	0.0236285	2.21869	0.000319305	0.000252697	0.0114726	0.000225349	0.00200577	0.00323397	0.00015084	0.00340155	0.0384623	0.0815656	0.0708633	0.106301	0.000516576	0.000136133	-9.35914e-06	2.55249e-05	205		7.07589	37	-0.0171176	0.00177105	1.2559	0.0389136	493.658	5.93205	0.453163	0.249992	15.5523	0.154231	2.99149	5.55317	0.0673254	9.84756	67.028	101.797	133.881	21.0533	0.310562	0.141621	-0.00414233
JP1	1.82619	1	-0.0021321	0.00256104	0.00544341	0.0068742	0.0231895	2.1536	0.000467478	0.000261612	0.0112602	6.21626e-05	0.0022819	0.00406684	0.000190389	0.00434335	0.0386161	0.0813	0.0791617	0.113289	0.000363664	3.82539e-05	2.45379e-05	0.000129107	206		7.83068	37	0.0727336	0.00111435	1.23786	0.0373104	484.486	5.75802	0.663454	0.258812	15.2644	0.0425447	3.40332	6.98331	0.0849775	12.5741	67.2961	101.466	149.559	22.4372	0.218632	0.0397962	0.0108604
JP1	1.58274	1	-0.00206694	0.00319872	0.00466978	0.00714618	0.0232049	1.99192	0.000348006	0.000151615	0.00949985	0.000255212	0.00178504	0.00348783	0.000606099	0.00463354	0.0364123	0.0760756	0.0715666	0.10341	0.000281622	0.000101797	-9.24334e-06	9.05127e-05	207		6.78677	37	0.0705108	0.00139182	1.06193	0.0387866	484.807	5.32576	0.493896	0.149992	12.878	0.174669	2.66229	5.98907	0.270524	13.4142	63.4555	94.9457	135.209	20.4806	0.169309	0.105901	-0.00409108
JP1	1.6728	1	-0.00149251	0.00531366	0.00513442	0.00641079	0.0225086	2.08724	0.000258637	0.000460778	0.0101979	0.000297749	0.00265723	0.00276327	0.000187862	0.00408308	0.0369844	0.0795396	0.0701087	0.106451	0.000358838	3.77463e-05	-9.56074e-06	2.60747e-05	208		7.17296	37	0.050915	0.00231206	1.1676	0.0347952	470.26	5.58061	0.367062	0.455847	13.8243	0.203782	3.9631	4.74491	0.0838498	11.8206	64.4526	99.269	132.455	21.0829	0.215731	0.0392681	-0.00423156
JP1	1.70483	1	0.000437988	0.0057024	0.00529004	0.0059474	0.0249095	2.1926	0.000321255	0.000287503	0.0093114	0.000293251	0.00228413	0.00318721	0.000550916	0.0042875	0.0370604	0.0784053	0.0712291	0.108792	0.000419943	0.00020349	-9.41632e-06	0.000125469	209		7.3103	37	-0.0149414	0.00248121	1.20299	0.0322801	520.42	5.86231	0.455932	0.284427	12.6226	0.200704	3.40665	5.47287	0.245894	12.4124	64.585	97.8533	134.572	21.5465	0.252467	0.211694	-0.00416764
JP1	1.84269	1	-0.0026411	0.0069242	0.00483587	0.00809019	0.0237053	2.2861	0.000408507	0.000548155	0.0107212	0.000273884	0.00293217	0.00349772	0.000124832	0.00444658	0.0381617	0.0803691	0.0723874	0.107592	0.000582551	0.000109244	2.51211e-05	2.70535e-05	210		7.90142	37	0.0900976	0.00301284	1.09971	0.0439104	495.261	6.11228	0.579761	0.542288	14.5337	0.187449	4.37316	6.00606	0.0557172	12.8729	66.5042	100.304	136.76	21.3088	0.350226	0.113649	0.0111185
JP1	1.75456	1	-9.66434e-05	0.00568275	0.00415237	0.00698173	0.0230236	2.11765	0.000548983	0.000383719	0.00915959	0.00025759	0.00213123	0.00292711	0.000249229	0.00444568	0.0354942	0.0715334	0.0647269	0.0925745	0.000317201	0.000102745	-9.32945e-06	9.13559e-05	211		7.52356	37	0.00329686	0.00247266	0.944273	0.037894	481.02	5.66191	0.779128	0.379612	12.4168	0.176297	3.17861	5.02625	0.11124	12.8703	61.8556	89.2769	122.287	18.3346	0.190699	0.106887	-0.00412919
JP1	1.70215	1	-0.00267313	0.0125987	0.00495469	0.00567823	0.0236946	2.12411	0.000354348	0.000154378	0.00847509	9.36289e-05	0.00175108	0.00308593	0.000151689	0.00388648	0.0345724	0.0668033	0.0622172	0.0938593	0.00022026	0.000103652	-9.41179e-06	2.56685e-05	212		7.2988	37	0.0911901	0.00548191	1.12673	0.0308192	495.038	5.67919	0.502897	0.152726	11.4889	0.0640805	2.61164	5.29897	0.0677042	11.2514	60.249	83.3735	117.546	18.5891	0.132419	0.107831	-0.00416563
JP1	1.83435	1	-0.00249269	0.00909982	0.00436571	0.00607891	0.0212438	2.0938	0.000418624	0.000186636	0.009622	0.000258494	0.00250283	0.0034996	0.000283176	0.00429593	0.0317015	0.0652519	0.0612233	0.0885446	0.000285243	7.00341e-05	2.37095e-05	2.55333e-05	213		7.86567	37	0.0850348	0.00395949	0.992787	0.0329939	443.836	5.59814	0.594119	0.184639	13.0436	0.176916	3.73283	6.0093	0.126392	12.4368	55.246	81.4372	115.668	17.5365	0.171486	0.0728577	0.0104937
JP1	1.85543	1	7.04023e-05	0.00835647	0.00469967	0.00774946	0.0209538	2.19329	0.000290608	0.000290114	0.00949665	0.000295914	0.00230487	0.00324971	0.000186705	0.00466242	0.0331849	0.0612218	0.05494	0.0831193	0.000255932	0.000138208	2.40631e-05	5.94789e-05	214		7.95606	37	-0.00240168	0.00363604	1.06873	0.042061	437.776	5.86415	0.412436	0.287009	12.8737	0.202526	3.43758	5.5802	0.0833331	13.4978	57.8311	76.4076	103.797	16.462	0.153865	0.14378	0.0106502
JP1	1.83004	1	0.000435931	0.00787555	0.00450275	0.00611844	0.0191051	2.14559	0.000518386	0.000153727	0.0103946	0.000291874	0.00230651	0.00343709	0.000151049	0.00387009	0.0332635	0.0582863	0.0552226	0.076065	0.000252438	7.01081e-05	-9.37209e-06	2.55603e-05	215		7.84718	37	-0.0148712	0.00342679	1.02395	0.0332085	399.152	5.73661	0.735704	0.152082	14.091	0.199761	3.44002	5.90195	0.0674187	11.204	57.9681	72.744	104.331	15.0649	0.151764	0.0729347	-0.00414807
JP1	1.91615	1	0.000685228	0.00714457	0.00437459	0.00704811	0.0174579	2.11211	0.000361411	0.000327003	0.0110201	9.54954e-05	0.00185381	0.0029779	0.000425989	0.00426914	0.0277414	0.0533874	0.0457515	0.0705891	0.000394199	-2.99202e-05	-9.5994e-06	9.39994e-05	216		8.21643	37	-0.0233756	0.00310872	0.994807	0.0382544	364.739	5.6471	0.512922	0.323503	14.9389	0.0653579	2.76485	5.11346	0.190134	12.3592	48.3448	66.6299	86.4375	13.9804	0.23699	-0.0311265	-0.00424867
JP1	1.79265	1	-0.00029873	0.00624376	0.00476161	0.00655325	0.0164395	2.09848	0.000221674	0.00018789	0.0109199	9.37616e-05	0.00162039	0.00345654	0.000185197	0.0043248	0.0291751	0.0489023	0.0419098	0.0607863	0.00028716	3.72109e-05	-9.42512e-06	0.000125587	217		7.68688	37	0.0101908	0.00271677	1.08282	0.0355684	343.461	5.61064	0.314604	0.18588	14.803	0.0641712	2.41671	5.93535	0.0826604	12.5204	50.8433	61.0322	79.1794	12.0389	0.172639	0.0387111	-0.00417153
JP1	1.72554	1	-0.00155735	0.00529056	0.00498283	0.00708885	0.0146356	2.06941	0.000219669	0.000153199	0.0103919	0.000158899	0.00160573	0.00269944	0.000315494	0.00448365	0.0248076	0.0427556	0.036924	0.0527891	0.000350549	0.00010286	-9.33989e-06	-7.52043e-06	218		7.3991	37	0.0531267	0.00230201	1.13312	0.0384755	305.773	5.53293	0.311759	0.151559	14.0873	0.108752	2.39486	4.6353	0.140817	12.9803	43.2321	53.3609	69.7599	10.455	0.210748	0.107007	-0.00413381
JP1	1.76125	1	-0.000793188	0.0028503	0.00419586	0.00676957	0.0142565	2.20186	0.000160205	0.000125307	0.0100752	0.00013125	0.00184584	0.00384578	0.000122525	0.00419242	0.0254119	0.0418058	0.035832	0.0517524	0.000399818	4.04623e-06	5.90497e-05	9.53393e-05	219		7.55221	37	0.0270585	0.00124022	0.954162	0.0367426	297.853	5.88706	0.227367	0.123966	13.658	0.0898284	2.75296	6.60373	0.0546874	12.1371	44.2852	52.1756	67.6968	10.2497	0.240368	0.00420936	0.0261352
JP1	1.7812	1	0.000391	0.00258906	0.00519209	0.00764148	0.013695	2.30514	0.000128308	0.000127792	0.0103101	2.86275e-05	0.00198768	0.00308026	0.000370481	0.00501251	0.0258809	0.0393938	0.0323884	0.0464485	0.000477899	3.92016e-05	6.02209e-05	2.70801e-05	220		7.63775	37	-0.0133384	0.00112654	1.18071	0.0414749	286.123	6.1632	0.182097	0.126425	13.9765	0.0195929	2.96451	5.28923	0.165359	14.5113	45.1025	49.1652	61.1909	9.19926	0.28731	0.0407821	0.0266536
JP1	1.78162	1	0.00191588	0.00301751	0.00495597	0.00804028	0.0122991	2.16075	0.000259923	0.00012366	0.0118798	0.000197407	0.00161794	0.00274307	0.000154856	0.0046125	0.0251462	0.0354277	0.0303195	0.0414764	0.000598209	3.99305e-06	5.82736e-05	0.000128027	221		7.63957	37	-0.0653577	0.00131297	1.12702	0.0436394	256.959	5.77715	0.368887	0.122336	16.1043	0.135107	2.41306	4.71022	0.0691177	13.3533	43.822	44.2154	57.2821	8.21452	0.35964	0.00415404	0.0257918
JP1	1.69694	1	-0.00123914	0.00340238	0.00443736	0.00649987	0.0107517	2.07356	8.86784e-05	0.000121549	0.0120444	0.000360846	0.00169041	0.00312996	0.000252298	0.00520168	0.0222749	0.0369336	0.0267565	0.0407686	0.000588	7.06483e-05	2.39174e-05	0.000125842	222		7.27645	37	0.0422715	0.00148043	1.00908	0.0352787	224.63	5.54404	0.125854	0.120249	16.3274	0.246966	2.52115	5.37456	0.11261	15.059	38.8184	46.0948	50.5505	8.07433	0.353502	0.0734966	0.0105858
JP1	1.61327	1	0.000831808	0.00316259	0.0044827	0.00645441	0.0093999	2.04101	-1.12691e-05	0.000186001	0.0127903	0.000158737	0.00199961	0.00296036	0.000117417	0.00520484	0.0216759	0.0345684	0.0264337	0.0373367	0.000943457	0.000102755	0.000221384	0.000157283	223		6.91771	37	-0.028376	0.0013761	1.01939	0.035032	196.387	5.45699	-0.0159934	0.184011	17.3386	0.108641	2.9823	5.08334	0.0524076	15.0681	37.7745	43.1429	49.9406	7.39464	0.5672	0.106898	0.097984
JP1	1.66695	1	0.00113458	0.00350945	0.00528243	0.00657018	0.0102641	2.19692	0.000124646	0.000158219	0.0125745	0.000232255	0.00182873	0.00302643	0.000257686	0.00446022	0.0243906	0.0358404	0.0277381	0.0407853	0.000702779	0.000276602	0.000126651	6.03814e-05	224		7.14789	37	-0.0387048	0.00152702	1.20126	0.0356603	214.442	5.87385	0.1769	0.156526	17.0461	0.158958	2.72744	5.19679	0.115015	12.9124	42.5053	44.7304	52.4051	8.07764	0.422506	0.287754	0.0560552
JP1	1.74184	1	-3.20428e-05	0.00438126	0.00524591	0.00648916	0.0107764	2.25997	0.000231267	0.000265491	0.015462	0.000340963	0.00231574	0.00336298	0.000332151	0.0049986	0.0256645	0.0377558	0.0324927	0.045615	0.000507996	0.000490374	0.000129106	0.000269961	225		7.46901	37	0.0010931	0.00190636	1.19295	0.0352206	225.145	6.04241	0.328219	0.26265	20.9603	0.233358	3.45379	5.7747	0.148251	14.471	44.7253	47.121	61.3879	9.03418	0.305404	0.510144	0.0571421
JP1	1.67214	1	-0.0002638	0.00587241	0.004633	0.00661213	0.0108957	2.11824	0.000187219	0.000120555	0.0144642	0.000390982	0.00227217	0.00406392	0.000250234	0.00462937	0.0229884	0.0363323	0.0317831	0.0456094	0.000682455	0.000566401	0.000156077	0.000124813	226		7.17013	37	0.00899917	0.00255519	1.05357	0.035888	227.638	5.66349	0.265705	0.119265	19.6078	0.267592	3.38882	6.97831	0.111688	13.4021	40.0617	45.3443	60.0472	9.03307	0.410288	0.589237	0.0690791
JP1	1.66678	1	-0.00118665	0.00541258	0.00460117	0.00632042	0.0116095	1.98982	0.000308563	0.000180299	0.0137739	0.00040946	0.00286513	0.00370026	0.000241612	0.00475741	0.0246311	0.036813	0.0315858	0.0472415	0.000563096	0.000323246	0.000150699	0.000120512	227		7.14713	37	0.0404811	0.0023551	1.04633	0.0343047	242.55	5.32013	0.437919	0.178369	18.6719	0.280238	4.27318	6.35385	0.10784	13.7728	42.9246	45.9443	59.6745	9.3563	0.33853	0.336278	0.0666991
JP1	1.60984	1	-0.0018644	0.00598114	0.00450695	0.00622389	0.0115099	2.05809	0.000154357	0.000187008	0.0141204	0.000259009	0.00247468	0.00330775	0.000350015	0.00483502	0.0241188	0.0412451	0.0355553	0.0528545	0.000617186	0.000368411	9.00317e-05	5.87216e-05	228		6.90298	37	0.0636014	0.0026025	1.02491	0.0337808	240.47	5.50266	0.219067	0.185006	19.1416	0.177268	3.69084	5.67985	0.156224	13.9975	42.0316	51.4757	67.1739	10.468	0.371048	0.383264	0.0398478
JP1	1.63868	1	-0.00237573	0.00493689	0.00496196	0.00705368	0.0112642	2.01037	0.000321572	0.0001879	0.0135544	0.000226949	0.00265296	0.0035233	0.000218502	0.00439161	0.0271725	0.0435162	0.0397041	0.0568475	0.000586835	7.05084e-05	0.000157052	2.57062e-05	229		7.02665	37	0.0810446	0.00214813	1.12838	0.0382846	235.336	5.37508	0.456381	0.185889	18.3745	0.155326	3.95674	6.04999	0.0975256	12.7138	47.3534	54.3101	75.0122	11.2588	0.352801	0.073351	0.069511
JP1	1.73945	1	-0.0005814	0.00506429	0.00430342	0.00726986	0.0114179	2.15351	0.000159096	0.000261058	0.0133226	0.00019865	0.00285804	0.00317021	0.000497379	0.00576935	0.0267087	0.046115	0.0423756	0.0614328	0.000533669	0.000311412	5.86408e-05	0.000162989	230		7.45876	37	0.0198337	0.00220356	0.978623	0.0394579	238.548	5.75778	0.225792	0.258264	18.0601	0.135958	4.26261	5.44368	0.221999	16.7024	46.5451	57.5535	80.0594	12.1669	0.320838	0.323967	0.0259543
JP1	1.70387	1	-0.00150811	0.00431	0.00514003	0.00733692	0.0112229	2.15895	0.000255557	0.000154954	0.012616	0.00016072	0.00199121	0.00309744	0.000185625	0.00523648	0.0267651	0.0475389	0.0442531	0.0658162	0.000488049	0.000137409	9.06657e-05	2.57643e-05	231		7.30619	37	0.0514472	0.00187535	1.16887	0.0398219	234.474	5.77232	0.362691	0.153295	17.1023	0.109998	2.96977	5.31873	0.0828514	15.1597	46.6433	59.3307	83.6066	13.0351	0.293412	0.142949	0.0401284
JP1	1.59893	1	0.000260011	0.00322667	0.00556151	0.00577727	0.0126038	1.96839	0.00021274	0.000467887	0.0117595	5.80307e-05	0.00238616	0.00427612	0.000305542	0.00491768	0.0259477	0.0455179	0.0447807	0.0656804	0.000275587	6.76634e-05	2.29069e-05	0.000120525	232		6.8562	37	-0.0088699	0.00140398	1.26472	0.0313567	263.324	5.26284	0.301925	0.46288	15.9412	0.0397167	3.55882	7.34268	0.136375	14.2368	45.2189	56.8084	84.6033	13.0082	0.165681	0.0703913	0.0101385
JP1	1.61922	1	0.000237466	0.00390089	0.00493181	0.00705818	0.014746	2.0571	0.00018851	0.000254653	0.0129291	0.00016046	0.00248807	0.00279258	0.000218642	0.00456133	0.0273568	0.0520521	0.0482675	0.0693885	0.000453942	7.05533e-05	9.05189e-05	0.00015899	233		6.94319	37	-0.00810082	0.00169734	1.12152	0.038309	308.079	5.5	0.267536	0.251928	17.5267	0.10982	3.71082	4.79524	0.0975878	13.2051	47.6745	64.9633	91.1909	13.7426	0.272907	0.0733978	0.0400634
JP1	1.71567	1	-0.000767346	0.0016864	0.00502506	0.00548297	0.0146594	2.15667	0.000387893	0.000121224	0.0130453	0.000260063	0.00261785	0.00405321	0.00035144	0.00505434	0.0294231	0.0535222	0.0478352	0.0739067	0.000420065	3.71869e-05	2.38534e-05	0.000125506	234		7.35679	37	0.026177	0.000733782	1.14273	0.0297594	306.272	5.76622	0.550505	0.119927	17.6842	0.17799	3.90437	6.95992	0.156861	14.6324	51.2755	66.7981	90.3742	14.6374	0.25254	0.0386861	0.0105575
JP1	1.72425	1	0.000575184	4.70051e-05	0.00471918	0.00853096	0.0152146	2.07128	0.000189349	0.000121927	0.0126517	0.000127709	0.00276688	0.00354125	0.000320011	0.00508363	0.0263375	0.0526878	0.0503334	0.0733604	0.000355568	3.93709e-06	2.39916e-05	9.27676e-05	235		7.39355	37	-0.0196216	2.04527e-05	1.07317	0.0463027	317.87	5.53794	0.268728	0.120622	17.1507	0.0874054	4.12664	6.08081	0.142833	14.7172	45.8981	65.7568	95.0941	14.5292	0.213765	0.00409582	0.0106186
JP1	1.71552	1	-0.00123931	-0.000255099	0.00507261	0.0071354	0.015839	2.1294	0.000255523	0.000355131	0.0118459	0.000194065	0.00235797	0.00343069	0.000485898	0.00480168	0.0284018	0.0542776	0.0491781	0.0744503	0.000487983	7.06582e-05	5.72871e-05	5.91272e-05	236		7.35615	37	0.0422774	-0.000110998	1.15354	0.0387281	330.914	5.69332	0.362642	0.35133	16.0583	0.13282	3.51678	5.89096	0.216874	13.9009	49.4956	67.7408	92.9112	14.7451	0.293372	0.0735069	0.0253551
JP1	1.70251	1	-0.0023584	7.9809e-05	0.00449542	0.00706834	0.0146291	2.07953	0.000153963	0.000285688	0.0118667	0.000258346	0.00236886	0.00333234	0.00034912	0.00452518	0.0295938	0.0522377	0.0503777	0.0723897	0.000384238	0.000103047	0.00018896	5.85714e-05	237		7.30034	37	0.0804535	3.47263e-05	1.02229	0.0383641	305.637	5.56	0.218507	0.28263	16.0866	0.176814	3.53302	5.72208	0.155825	13.1005	51.5729	65.195	95.1777	14.337	0.231002	0.107201	0.0836331
JP1	1.6553	1	-0.00275899	0.00113058	0.0053282	0.00698879	0.0150874	2.03513	0.000250272	0.000151749	0.012944	0.000222758	0.0023422	0.00371969	0.00031251	0.00493178	0.0282444	0.050894	0.0474117	0.072264	0.000575999	3.65256e-05	8.87908e-05	0.000123274	238		7.09793	37	0.0941193	0.000491934	1.21166	0.0379324	315.212	5.44128	0.355191	0.150125	17.547	0.152458	3.49326	6.38722	0.139485	14.2776	49.2213	63.5179	89.5741	14.3121	0.346287	0.0379982	0.0392986
JP1	1.70401	1	-0.000235124	0.0047695	0.0044579	0.00617351	0.0148787	2.09727	0.000191074	2.17271e-05	0.0133079	0.000263953	0.00208257	0.00353974	0.000120306	0.00553551	0.0277289	0.0549001	0.0516071	0.0727061	0.000595197	3.7743e-05	9.17503e-05	0.000296233	239		7.30677	37	0.00802093	0.00207529	1.01375	0.0335074	310.852	5.60742	0.271176	0.0214945	18.0403	0.180652	3.10603	6.07821	0.0536969	16.0254	48.323	68.5178	97.5004	14.3997	0.357829	0.0392647	0.0406084
JP1	1.70176	1	-0.00099149	0.00957999	0.00569113	0.00656917	0.0151129	2.23117	0.000363109	9.00571e-05	0.0125726	0.000266289	0.00274865	0.00357106	0.000359853	0.00466429	0.0292389	0.0535698	0.0504534	0.0708182	0.000600464	0.000140284	2.44244e-05	9.4441e-05	240		7.29714	37	0.0338233	0.00416842	1.2942	0.0356549	315.745	5.96543	0.515332	0.0890933	17.0435	0.18225	4.09945	6.132	0.160615	13.5032	50.9545	66.8575	95.3206	14.0257	0.360995	0.14594	0.0108102
JP1	1.76943	1	-0.000954988	0.0165847	0.00561069	0.00601022	0.0141253	2.17385	0.00039631	5.58658e-05	0.0109457	0.000299701	0.00253867	0.00369923	0.000325071	0.005232	0.0269925	0.0553675	0.0491468	0.0723016	0.000463174	7.19881e-05	9.23598e-05	0.000162223	241		7.58731	37	0.0325781	0.00721627	1.2759	0.0326211	295.112	5.81218	0.56245	0.0552679	14.838	0.205118	3.78628	6.35208	0.145091	15.1467	47.0398	69.1011	92.8521	14.3195	0.278457	0.0748905	0.0408782
JP1	1.61679	1	-0.000815478	0.0175414	0.00426099	0.00562029	0.0141342	2.10433	0.000379177	5.34507e-05	0.0109607	0.000546943	0.00249397	0.00275871	0.000473642	0.00393217	0.0289906	0.0508146	0.0476762	0.068033	0.000573249	3.82645e-06	0.000120892	0.00015521	242		6.93278	37	0.0278189	0.00763257	0.968974	0.0305047	295.299	5.6263	0.538135	0.0528786	14.8583	0.374332	3.71961	4.73709	0.211404	11.3837	50.5218	63.4189	90.0737	13.4741	0.344634	0.00398072	0.0535064
JP1	1.62393	1	-0.00154991	0.0250378	0.00512322	0.00616714	0.0151915	2.03699	0.000349962	0.000152467	0.0111313	0.000158141	0.00212343	0.0029164	0.000281153	0.00370671	0.0269942	0.0517953	0.0488246	0.0697704	0.000644394	3.66983e-05	0.000122046	9.10215e-05	243		6.9634	37	0.0528731	0.0108944	1.16505	0.0334728	317.388	5.44624	0.496673	0.150835	15.0897	0.108233	3.16698	5.00785	0.125489	10.731	47.0427	64.6428	92.2434	13.8182	0.387405	0.0381779	0.0540173
JP1	1.65043	1	-0.0017128	0.0295806	0.00534629	0.00533785	0.0127048	2.17921	0.000349498	8.66813e-05	0.0103942	0.000289098	0.00264561	0.0030437	0.000346363	0.00429237	0.0257415	0.0551907	0.0466169	0.0670444	0.000413996	0.000102233	0.000121884	0.000156484	244		7.07703	37	0.0584297	0.012871	1.21578	0.0289718	265.434	5.82649	0.496014	0.0857536	14.0904	0.197861	3.94578	5.22644	0.154595	12.4265	44.8596	68.8805	88.0724	13.2783	0.248892	0.106355	0.0539457
JP1	1.67429	1	-0.00241578	0.0312447	0.00545927	0.00632935	0.0149652	2.10169	0.000638622	0.000280793	0.0106226	0.000286407	0.00236076	0.00369757	0.000375625	0.00428489	0.0272288	0.054644	0.0478812	0.0688988	0.000475115	3.82194e-06	-9.19654e-06	9.00544e-05	245		7.17932	37	0.0824109	0.0135951	1.24147	0.0343532	312.659	5.61923	0.906344	0.277788	14.4	0.196019	3.52094	6.34924	0.167655	12.4048	47.4515	68.1982	90.4611	13.6456	0.285636	0.00397603	-0.00407037
JP1	1.69835	1	-0.00201593	0.0262433	0.00476967	0.00670437	0.0136004	2.13352	0.000317658	0.000218503	0.00970114	0.000388638	0.00248911	0.00331596	0.000347404	0.00368002	0.0266106	0.0545623	0.0497996	0.0712413	0.000513911	-2.90209e-05	-9.31087e-06	0.000124064	246		7.2825	37	0.0687707	0.0114189	1.08465	0.0363887	284.146	5.70433	0.450826	0.216165	13.1509	0.265987	3.71236	5.69396	0.155059	10.6537	46.3741	68.0961	94.0855	14.1095	0.30896	-0.0301909	-0.00412097
JP1	1.72798	1	-0.00235281	0.0200487	0.00519301	0.00593186	0.0139303	2.12023	0.000429554	0.000191509	0.0104508	0.000163438	0.0024321	0.0034213	0.000154829	0.00403481	0.0292263	0.0607698	0.0506988	0.075174	0.00029269	0.000173668	-9.60663e-06	6.0135e-05	247		7.40957	37	0.0802628	0.00872353	1.18092	0.0321958	291.038	5.6688	0.609631	0.189459	14.1671	0.111858	3.62734	5.87484	0.0691058	11.6808	50.9324	75.8434	95.7843	14.8884	0.175964	0.18067	-0.00425187
JP1	1.63822	1	-0.00265127	0.0127498	0.00480042	0.00526965	0.0125697	2.031	0.000370553	0.00014759	0.00953405	0.000280223	0.00196016	0.00298204	0.000208589	0.00489196	0.0285544	0.0555757	0.0491168	0.0662622	0.000560211	3.55245e-05	-8.99797e-06	0.000119895	248		7.02468	37	0.0904444	0.00554764	1.09164	0.0286016	262.611	5.43024	0.525896	0.146011	12.9244	0.191787	2.92346	5.12056	0.093101	14.1623	49.7616	69.3609	92.7955	13.1234	0.336795	0.0369567	-0.00398248
JP1	1.60803	1	-0.00182616	0.00579291	0.005682	0.00564119	0.0144635	2.11853	0.000378397	0.000345462	0.0098008	5.89493e-05	0.00190428	0.00314254	0.00044021	0.00340443	0.0304617	0.0583858	0.0464359	0.0707935	0.000215034	0.000101192	5.57274e-05	5.75173e-05	249		6.89521	37	0.062297	0.0025206	1.29212	0.0306181	302.178	5.66427	0.537028	0.341765	13.286	0.0403454	2.84012	5.39616	0.196482	9.8559	53.0855	72.868	87.7306	14.0208	0.129277	0.105272	0.0246648
JP1	1.67153	1	-0.00117354	0.00394442	0.0058141	0.00466845	0.0134107	2.15542	0.000188999	0.000121701	0.00991925	0.000261086	0.00219357	0.00313386	0.000352822	0.00400498	0.0301421	0.0607254	0.0543058	0.0707424	0.00035491	0.00010414	5.73505e-05	5.91926e-05	250		7.16751	37	0.0400338	0.00171628	1.32216	0.0253385	280.182	5.7629	0.268231	0.120399	13.4466	0.17869	3.27158	5.38126	0.157478	11.5945	52.5285	75.788	102.599	14.0107	0.21337	0.108338	0.0253832
JP1	1.725	1	-0.0019094	0.00175404	0.00505761	0.00644201	0.0137612	2.15168	0.000158084	0.000191522	0.0100779	0.000299198	0.0016517	0.00277672	0.000120902	0.00413689	0.0314756	0.0621749	0.0526821	0.0721465	0.000224835	-2.99448e-05	-9.60729e-06	6.01391e-05	251		7.39677	37	0.0651367	0.000763214	1.15013	0.0349647	287.506	5.7529	0.224355	0.189472	13.6616	0.204774	2.46342	4.76801	0.053963	11.9764	54.8523	77.597	99.5314	14.2888	0.13517	-0.0311521	-0.00425216
JP1	1.6855	1	-0.00166649	0.00155298	0.00545731	0.0058007	0.013321	1.97362	0.000180523	0.000243864	0.00873962	0.000121756	0.00225472	0.00321665	0.000177473	0.00382536	0.0285344	0.0595121	0.051453	0.0693638	0.000179467	0.000131375	2.28733e-05	-7.27252e-06	252		7.22742	37	0.0568501	0.000675726	1.24103	0.0314839	278.309	5.27682	0.256201	0.241254	11.8475	0.0833309	3.36278	5.52343	0.0792127	11.0745	49.7268	74.2737	97.2092	13.7377	0.107894	0.136671	0.0101236
JP1	1.5513	1	-0.0038775	0.00601879	0.00545128	0.00495294	0.013151	1.92434	0.000387531	0.000295235	0.00948963	0.000208679	0.00173494	0.00259675	0.00047645	0.00379316	0.029101	0.0580308	0.0478636	0.0695722	0.000294672	-2.70135e-05	2.19484e-05	2.36368e-05	253		6.65195	37	0.132276	0.00261888	1.23965	0.0268826	274.757	5.14507	0.549991	0.292075	12.8642	0.142822	2.58756	4.45898	0.212657	10.9813	50.7142	72.425	90.4279	13.779	0.177155	-0.0281026	0.00971432
JP1	1.64586	1	-0.00185615	-0.00144617	0.00600656	0.0057998	0.0152968	2.02188	0.00038461	0.000219171	0.009004	0.000323844	0.00226545	0.00273226	0.000216502	0.00349332	0.0307963	0.0638295	0.0541334	0.0709952	0.00041651	3.88128e-06	5.66424e-05	2.54709e-05	254		7.05743	37	0.0633199	-0.000629252	1.36593	0.031479	319.588	5.40585	0.545846	0.216825	12.2059	0.221642	3.37879	4.69167	0.096633	10.1132	53.6685	79.6621	102.273	14.0608	0.250403	0.00403776	0.0250698
JP1	1.70315	1	-0.00132041	-0.00150725	0.00437286	0.00558215	0.0141886	2.14823	0.000317527	0.000185536	0.0079859	0.000289847	0.00258671	0.00305158	0.000117123	0.00318535	0.0296012	0.0608274	0.0554349	0.0726973	0.000184932	6.96214e-05	-9.30702e-06	2.53828e-05	255		7.30308	37	0.0450441	-0.00065583	0.994413	0.0302977	296.434	5.74367	0.45064	0.183551	10.8257	0.198374	3.85793	5.23998	0.0522765	9.22166	51.5859	75.9153	104.732	14.3979	0.11118	0.0724283	-0.00411927
JP1	1.68298	1	-0.0040298	-0.000669482	0.0054372	0.00621089	0.0150031	2.19335	0.000226205	0.000191731	0.00818426	0.000401449	0.00226505	0.0024057	0.000426805	0.00424334	0.032976	0.0630637	0.0524319	0.0781274	0.000394954	7.19461e-05	2.43567e-05	0.000196103	256		7.21658	37	0.137471	-0.000291303	1.23645	0.0337102	313.451	5.8643	0.321035	0.189679	11.0946	0.274755	3.37819	4.13091	0.190499	12.2845	57.4671	78.7063	99.0587	15.4733	0.237444	0.0748467	0.0107802
JP1	1.78593	1	-0.00148871	-0.00161499	0.00531008	0.00585349	0.017507	2.12098	0.000160587	0.00016008	0.0081669	0.000338411	0.00236736	0.00264832	0.000157292	0.00354704	0.0338078	0.0692012	0.0576438	0.0826024	0.00040077	7.30056e-05	-9.75943e-06	0.000198991	257		7.65805	37	0.0507853	-0.00070271	1.20754	0.0317704	365.763	5.6708	0.227908	0.158367	11.0711	0.231612	3.53078	4.54753	0.070205	10.2687	58.9166	86.3662	108.905	16.3596	0.240941	0.075949	-0.0043195
JP1	1.66903	1	-0.000716402	-0.000672965	0.00558917	0.00558114	0.0169535	1.98105	0.000313755	0.000150846	0.00694796	0.000383863	0.00229577	0.00282042	0.000278163	0.00421988	0.0332597	0.0667152	0.0567054	0.07663	0.000182735	3.63081e-05	2.32898e-05	5.75675e-05	258		7.15679	37	0.0244391	-0.000292819	1.27101	0.0302922	354.2	5.29668	0.445287	0.149232	9.41869	0.262719	3.42401	4.84304	0.124154	12.2166	57.9615	83.2635	107.132	15.1768	0.109859	0.037772	0.010308
JP1	1.61738	1	-0.00258003	-0.000317776	0.00605798	0.00529156	0.0162508	2.10723	0.000252041	5.40866e-05	0.00838967	0.000454714	0.00252364	0.0026928	0.000446366	0.0048679	0.0331006	0.069878	0.0574149	0.0821634	0.000250952	0.000135519	2.35948e-05	-7.50194e-06	259		6.9353	37	0.0880143	-0.00013827	1.37762	0.0287205	339.518	5.63405	0.357701	0.0535077	11.3731	0.311211	3.76387	4.62391	0.199229	14.0927	57.6843	87.2109	108.473	16.2727	0.150871	0.140983	0.010443
JP1	1.67769	1	-0.00257052	0.000247297	0.00604798	0.00530763	0.0165686	2.11435	0.000453699	0.0002539	0.00840105	0.000159985	0.00301221	0.00235215	0.000350869	0.00358385	0.03581	0.0700267	0.0583178	0.0832623	0.000319726	0.000236436	-9.40372e-06	5.88648e-05	260		7.19392	37	0.0876896	0.000107603	1.37535	0.0288077	346.158	5.65309	0.643898	0.251183	11.3885	0.109495	4.49253	4.03896	0.156605	10.3753	62.4059	87.3964	110.179	16.4903	0.192217	0.245969	-0.00416206
JP1	1.72987	1	-0.00250343	0.00306099	0.00572468	0.00524437	0.0187178	2.18765	5.58199e-05	0.000257316	0.00932304	0.000162138	0.00312006	0.00265345	0.000220928	0.00386771	0.0342977	0.067237	0.0616441	0.0839767	0.000324027	0.000273282	5.78002e-05	9.33219e-05	261		7.41767	37	0.085401	0.00133189	1.30183	0.0284644	391.06	5.84906	0.0792206	0.254562	12.6384	0.110968	4.65339	4.55634	0.0986082	11.1971	59.7705	83.9147	116.463	16.6318	0.194803	0.2843	0.0255822
JP1	1.80532	1	-0.00314584	0.00485223	0.00497587	0.00453876	0.0180867	2.11353	0.000318203	0.000218878	0.00816765	0.000455199	0.00272401	0.00200346	0.000413894	0.00342277	0.0331692	0.0687901	0.0597316	0.082615	0.00035006	0.00016861	2.362e-05	0.000124277	262		7.74119	37	0.107316	0.00211129	1.13154	0.0246346	377.876	5.65089	0.4516	0.216536	11.0721	0.311542	4.06271	3.44021	0.184736	9.90897	57.8037	85.8531	112.85	16.3621	0.210454	0.175408	0.0104541
JP1	1.77107	1	-0.00238576	0.00378012	0.00478197	0.00564371	0.0216125	2.11251	0.000256058	0.000188694	0.00929308	0.00029478	0.00329946	0.00266884	0.000353171	0.00333987	0.0340311	0.06806	0.0592725	0.0851861	0.000388697	7.08062e-05	2.39708e-05	9.26873e-05	263		7.59433	37	0.081387	0.0016448	1.08745	0.0306318	451.537	5.64817	0.363402	0.186674	12.5977	0.20175	4.92095	4.58277	0.157633	9.66899	59.3057	84.9419	111.982	16.8713	0.233682	0.0736609	0.0106094
JP1	1.70692	1	-0.00347472	0.00447919	0.00491662	0.00474989	0.0211684	2.03892	0.000338016	0.000210692	0.0089414	0.000501602	0.00224124	0.00237284	0.00030327	0.00367564	0.0334566	0.0658338	0.0552946	0.0846878	0.000336967	9.88746e-05	2.27365e-05	5.62e-05	264		7.31928	37	0.118535	0.00194897	1.11807	0.0257805	442.26	5.4514	0.479719	0.208437	12.121	0.343301	3.34267	4.07449	0.13536	10.641	58.3046	82.1635	104.467	16.7726	0.202582	0.102861	0.0100631
JP1	1.64275	1	-9.56979e-05	0.00460898	0.00499383	0.00374405	0.0205362	2.08136	0.000576246	0.000347331	0.00988647	0.000189802	0.00273075	0.00195177	0.000377325	0.00355339	0.0344587	0.0672151	0.0576195	0.0858956	0.000314098	0.00019964	2.33954e-05	0.000123096	265		7.04408	37	0.0032646	0.00200545	1.13563	0.0203212	429.052	5.56487	0.817819	0.343614	13.4021	0.129902	4.07275	3.35146	0.168414	10.2871	60.051	83.8875	108.859	17.0119	0.188834	0.207689	0.0103547
JP1	1.55818	1	-0.00161875	0.00200808	0.00428772	0.0046834	0.0207651	1.87017	0.000277876	0.000104825	0.00693084	0.000224882	0.00223493	0.00180709	0.000390211	0.00359347	0.0292541	0.0552601	0.0504526	0.0746888	0.00019061	3.38486e-06	2.06265e-05	5.09845e-05	266		6.68148	37	0.0552213	0.000873751	0.975052	0.0254196	433.833	5.00022	0.394367	0.103703	9.39548	0.153911	3.33327	3.10302	0.174165	10.4032	50.9809	68.967	95.3191	14.7923	0.114593	0.00352133	0.00912924
JP1	1.79999	1	-0.000944693	0.00156924	0.00467487	0.00523857	0.0252845	2.23384	0.00052655	0.000257031	0.0100868	0.000229214	0.00288121	0.00265052	0.000254311	0.00352716	0.0327748	0.0638768	0.0532503	0.0832079	0.000290041	0.000172096	-9.51968e-06	2.59628e-05	267		7.71835	37	0.0322269	0.000682801	1.06309	0.0284329	528.254	5.97256	0.747289	0.254281	13.6738	0.156876	4.29716	4.5513	0.113508	10.2112	57.1164	79.7211	100.605	16.4796	0.174371	0.179034	-0.00421339
JP1	1.75109	1	-0.000404003	0.000182744	0.00525625	0.0048093	0.0279381	2.08594	0.000156922	0.000324866	0.00899214	0.000195935	0.00281898	0.00191378	0.00035583	0.00366821	0.0310414	0.0605648	0.0539891	0.0779758	0.000357935	0.000138715	-9.53668e-06	2.60091e-05	268		7.50867	37	0.013782	7.9515e-05	1.1953	0.026103	583.694	5.57714	0.222706	0.32139	12.1898	0.1341	4.20435	3.28621	0.15882	10.6195	54.0957	75.5876	102.001	15.4433	0.215188	0.144308	-0.00422091
JP1	1.70527	1	-0.00152487	-0.00197745	0.00501753	0.00431529	0.028898	2.01259	0.000120732	0.000153251	0.0100981	0.000422986	0.0031578	0.00283237	0.000249593	0.00399011	0.0295832	0.0541862	0.0471507	0.0690355	0.000515689	3.88283e-06	2.3661e-05	5.84852e-05	269		7.31218	37	0.0520189	-0.000860424	1.14101	0.0234217	603.749	5.38101	0.171345	0.15161	13.689	0.289495	4.70968	4.86357	0.111403	11.5515	51.5544	67.6269	89.0809	13.6727	0.310029	0.00403938	0.0104723
JP1	1.59766	1	0.000449577	4.4572e-05	0.00555509	0.00392664	0.0292539	2.05809	0.000243014	0.000242547	0.00894661	0.000216298	0.00294098	0.00202484	0.000144782	0.00336013	0.0271066	0.0469922	0.042751	0.0573315	0.000527561	-2.79997e-05	2.27497e-05	2.44997e-05	270		6.85077	37	-0.0153367	1.9394e-05	1.26326	0.0213123	611.186	5.50266	0.34489	0.239951	12.1281	0.148036	4.38631	3.47693	0.0646213	9.72764	47.2385	58.6484	80.7687	11.3547	0.317166	-0.0291285	0.010069
JP1	1.72413	1	-0.000992154	0.00107396	0.0057368	0.00348478	0.0315788	2.14276	0.000120568	0.000153042	0.00906161	0.000290574	0.00246136	0.00200421	0.000282213	0.00329222	0.0257408	0.0414536	0.0360261	0.0533964	0.000350192	0.000168674	-9.33036e-06	-7.51276e-06	271		7.39306	37	0.033846	0.000467299	1.30458	0.018914	659.758	5.72905	0.171112	0.151404	12.284	0.198872	3.67098	3.4415	0.125962	9.53103	44.8583	51.7359	68.0635	10.5753	0.210533	0.175474	-0.0041296
JP1	1.71414	1	3.57038e-05	-0.00117487	0.00522138	0.00468697	0.0312909	2.09197	0.00015293	0.00021811	0.00981499	0.000125289	0.00218882	0.00219341	0.000215454	0.00383788	0.023402	0.0370382	0.03114	0.0410086	0.000315999	3.66936e-05	-9.2941e-06	2.53475e-05	272		7.3502	37	-0.00121799	-0.000511208	1.18737	0.025439	653.744	5.59325	0.217041	0.215775	13.3052	0.0857491	3.2645	3.76638	0.096165	11.1107	40.7825	46.2254	58.8323	8.12186	0.189977	0.038173	-0.00411355
JP1	1.69794	1	-0.000296522	-0.000285712	0.00459423	0.00428796	0.0370899	2.12236	0.000186988	5.43102e-05	0.0105414	0.000126116	0.0029637	0.00217484	0.000282972	0.0036646	0.0192831	0.029653	0.0259743	0.0332315	0.000615516	0.000136079	-9.35546e-06	2.55149e-05	273		7.28077	37	0.0101154	-0.000124318	1.04475	0.0232734	774.898	5.67451	0.265376	0.053729	14.29	0.0863152	4.42019	3.7345	0.126301	10.6091	33.6045	37.0083	49.0728	6.58159	0.370044	0.141566	-0.0041407
JP1	1.6555	1	-0.00193279	4.42922e-05	0.00539378	0.00364973	0.0324675	1.94345	8.38196e-05	0.000146423	0.00930102	5.72709e-05	0.00241798	0.00239086	0.000270008	0.00330751	0.0180837	0.0230123	0.0204526	0.0269392	0.000618851	6.67774e-05	-8.92685e-06	2.43459e-05	274		7.09876	37	0.0659343	1.92723e-05	1.22658	0.0198093	678.324	5.19614	0.118958	0.144856	12.6085	0.0391967	3.60628	4.10543	0.120514	9.57529	31.5143	28.7203	38.6406	5.33539	0.372049	0.0694697	-0.003951
JP1	1.65027	1	-0.000356153	-0.000541093	0.00535234	0.00417525	0.0361993	2.02465	2.13412e-05	2.08643e-05	0.0104417	0.000253472	0.00190259	0.00200441	0.000277674	0.00340141	0.0161273	0.0194719	0.0159636	0.0221182	0.000733709	0.000101103	-9.1803e-06	5.74663e-05	275		7.07634	37	0.0121497	-0.000235439	1.21715	0.0226616	756.291	5.41326	0.0302879	0.020641	14.1548	0.173478	2.8376	3.44184	0.123936	9.84716	28.1049	24.3018	30.1597	4.38056	0.441101	0.105179	-0.00406318
JP1	1.72578	1	-0.00136518	0.00134702	0.00474212	0.00373787	0.034841	2.15291	5.49783e-05	8.76483e-05	0.0127012	0.000259166	0.00197849	0.0019168	0.000383385	0.00278119	0.0147624	0.0173506	0.0138643	0.0183327	0.000551246	0.000202847	2.37711e-05	0.000125073	276		7.40012	37	0.0465713	0.00058611	1.07839	0.0202877	727.913	5.75619	0.0780262	0.0867103	17.2178	0.177375	2.9508	3.29142	0.171119	8.05158	25.7264	21.6543	26.1935	3.63085	0.331405	0.211025	0.010521
JP1	1.79609	1	-0.00102258	0.00192659	0.00581046	0.00498576	0.0347362	2.16986	0.000124265	8.97954e-05	0.0133187	9.56652e-05	0.00246856	0.00223552	0.000324837	0.00308744	0.0142055	0.0146449	0.0112105	0.0141235	0.000734599	0.000105906	2.43534e-05	2.62267e-05	277		7.70164	37	0.0348839	0.000838292	1.32133	0.0270608	725.724	5.80149	0.176359	0.0888344	18.0549	0.0654741	3.68172	3.83869	0.144987	8.93821	24.7558	18.2775	21.1797	2.79721	0.441636	0.110176	0.0107788
JP1	1.28408	1	0.000676854	0.00196091	0.00366548	0.00303606	0.0245176	1.51973	0.000111576	6.33171e-05	0.00946324	0.000163268	0.00178879	0.00112122	0.000157192	0.00244052	0.0100646	0.00907905	0.00684942	0.00787353	0.000494032	0.000122583	1.71722e-05	4.24463e-05	278		5.50614	37	-0.0230899	0.000853225	0.833551	0.0164785	512.232	4.06325	0.15835	0.0626395	12.8284	0.111742	2.66788	1.92528	0.0701605	7.06536	17.5395	11.3311	12.9405	1.55938	0.297009	0.127526	0.00760039
JP1	1.72446	1	-0.000320715	0.00298578	0.00510952	0.00416858	0.0332085	2.02439	8.53984e-05	5.27982e-05	0.0134327	0.000251116	0.00230257	0.00169663	0.000210838	0.00272693	0.0115046	0.0101188	0.00802941	0.00888899	0.000534124	0.000196546	2.30328e-05	5.69322e-05	279		7.39447	37	0.0109408	0.00129916	1.16193	0.0226254	693.806	5.41255	0.121199	0.0522331	18.2095	0.171866	3.43414	2.91334	0.0941048	7.89451	20.049	12.6287	15.1698	1.76049	0.321112	0.20447	0.0101942
JP1	1.71712	1	-0.000917863	0.00216107	0.00528799	0.00429574	0.0361241	2.15273	5.61949e-05	-1.20863e-05	0.0140346	0.000264901	0.00212394	0.002027	0.000324086	0.00314809	0.0113217	0.00867229	0.0064689	0.0077156	0.000597336	0.000342901	-9.59425e-06	6.00575e-05	280		7.363	37	0.0313116	0.000940319	1.20252	0.0233156	754.72	5.7557	0.0797528	-0.0119569	19.0253	0.181301	3.16774	3.48064	0.144652	9.11378	19.7303	10.8234	12.2216	1.5281	0.359114	0.356726	-0.00424639
JP1	1.69562	1	0.00200884	0.00024326	0.00578553	0.00378192	0.0317022	2.13709	0.000184884	5.36991e-05	0.0136946	0.000255401	0.00221116	0.00218304	0.000247112	0.00290417	0.0098361	0.00819791	0.00564842	0.00678506	0.000379858	0.000297928	2.34258e-05	5.79038e-05	281		7.27081	37	-0.0685288	0.000105846	1.31566	0.0205268	662.336	5.71387	0.26239	0.0531245	18.5645	0.174799	3.29781	3.74859	0.110295	8.40761	17.1413	10.2314	10.6715	1.3438	0.228368	0.30994	0.0103682
JP1	1.81003	1	0.00131339	0.00477089	0.00527815	0.00502946	0.0352822	2.27212	0.000125354	9.05823e-05	0.0157348	0.000267841	0.00238739	0.00246071	0.000499022	0.00359424	0.0105554	0.00784264	0.00475776	0.00547002	0.00108371	0.000346707	-9.70075e-06	0.000163527	282		7.76138	37	-0.0448045	0.0020759	1.20028	0.0272979	737.131	6.07491	0.177904	0.0896129	21.3301	0.183313	3.56066	4.22538	0.222732	10.4054	18.3949	9.78796	8.98875	1.08335	0.65152	0.360685	-0.00429353
JP1	1.81668	1	0.00010423	0.003635	0.00558745	0.00409652	0.0334938	2.16224	2.21445e-05	0.000156248	0.0146421	0.000195713	0.00214245	0.0018443	0.000422724	0.00322659	0.00969143	0.00632058	0.00406594	0.0046984	0.000492127	0.000306806	-9.52584e-06	5.96293e-05	283		7.7899	37	-0.00355566	0.00158165	1.27062	0.0222343	699.768	5.78112	0.0314279	0.154576	19.8489	0.133947	3.19534	3.16692	0.188677	9.34104	16.8892	7.88837	7.68171	0.93053	0.295864	0.319176	-0.00421611
JP1	1.79468	1	0.00121528	0.00442291	0.00471882	0.00424139	0.0394781	2.18271	5.5484e-05	0.000121917	0.0150299	0.000228087	0.00172898	0.00190097	8.5748e-05	0.0033425	0.00879998	0.00608433	0.00444489	0.00547571	0.000623241	0.000505876	-9.47287e-06	5.92977e-05	284		7.69557	37	-0.0414576	0.00192448	1.07309	0.0230206	824.795	5.83585	0.0787439	0.120612	20.3746	0.156105	2.57868	3.26423	0.0382724	9.67661	15.3357	7.59352	8.39765	1.08448	0.374689	0.526271	-0.00419267
JP1	1.75452	1	-0.000321519	0.00441913	0.00479992	0.00404987	0.0364723	2.09974	0.000150029	0.000149555	0.0144021	0.000380579	0.00230834	0.00221621	0.000275783	0.00328163	0.0087281	0.00572743	0.00350495	0.00433609	0.000889754	0.000132622	2.30905e-05	2.48667e-05	285		7.52335	37	0.0109682	0.00192284	1.09153	0.0219811	761.995	5.61403	0.212924	0.147955	19.5235	0.260472	3.44275	3.80554	0.123092	9.50037	15.2104	7.14809	6.62184	0.858775	0.534914	0.137969	0.0102198
JP1	1.6716	1	0.00060462	0.000930644	0.00525837	0.00417875	0.0344401	2.04422	5.21938e-05	2.02526e-05	0.0140124	0.00024604	0.00253964	0.00219746	0.000206576	0.00308134	0.0083411	0.00449525	0.00333108	0.00417486	0.000901067	0.00025553	-8.91114e-06	8.72597e-05	286		7.16779	37	-0.0206258	0.000404939	1.19578	0.0226806	719.537	5.46557	0.0740745	0.0200359	18.9953	0.168392	3.78773	3.77335	0.0922026	8.92053	14.536	5.61027	6.29335	0.826843	0.541715	0.265832	-0.00394405
JP1	1.79119	1	0.000137241	0.00441624	0.0055146	0.00537202	0.0359835	2.23698	0.000122225	0.000188558	0.0156765	0.000261156	0.00236121	0.00183128	0.000352916	0.00363817	0.00838543	0.00580786	0.00433795	0.00453158	0.000822775	0.000204404	-9.4586e-06	2.57962e-05	287		7.68062	37	-0.00468177	0.00192158	1.25405	0.0291572	751.784	5.98096	0.173464	0.18654	21.2511	0.178737	3.52161	3.14456	0.157519	10.5326	14.6132	7.24847	8.19562	0.897492	0.494647	0.212645	-0.00418635
JP1	1.80268	1	0.000816776	0.000182803	0.00481953	0.0041025	0.035104	2.15104	2.21768e-05	5.53801e-05	0.0170939	0.0001623	0.00217928	0.00215028	0.000221149	0.0033998	0.00818745	0.00535188	0.00380196	0.00507595	0.000593943	0.000105061	-9.53975e-06	5.97164e-05	288		7.72989	37	-0.0278632	7.95406e-05	1.09599	0.0222668	733.409	5.75118	0.0314738	0.0547874	23.1726	0.111079	3.25026	3.69233	0.0987068	9.84248	14.2682	6.67938	7.18296	1.00531	0.357074	0.109297	-0.00422227
JP1	1.73117	1	0.00100925	-0.000120514	0.0054346	0.00616036	0.0353951	2.14947	8.86033e-05	2.14462e-05	0.0164075	0.000327207	0.00238898	0.0022603	0.000252084	0.0039966	0.00839901	0.00606085	0.00472807	0.00522091	0.000820836	0.000103922	-9.43631e-06	-7.59807e-06	289		7.42326	37	-0.0344293	-5.24377e-05	1.23586	0.033436	739.489	5.74697	0.125747	0.0212166	22.2421	0.223943	3.56302	3.88125	0.112514	11.5702	14.6369	7.56421	8.93265	1.03401	0.493481	0.108112	-0.00417649
JP1	1.60908	1	-0.000122116	0.000946712	0.00504995	0.00451479	0.0314858	2.00113	2.03837e-05	0.000143825	0.0140983	0.000211125	0.00206502	0.00225519	0.000358138	0.00318686	0.00919992	0.00649976	0.00566398	0.00733023	0.000793712	6.55923e-05	2.22057e-05	8.58621e-05	290		6.89971	37	0.0041658	0.000411931	1.14839	0.0245045	657.815	5.35037	0.028929	0.142286	19.1117	0.144496	3.07985	3.87247	0.15985	9.22601	16.0326	8.11199	10.7008	1.45177	0.477175	0.0682368	0.0098282
JP1	1.72242	1	0.00113699	0.00245187	0.00539641	0.00596879	0.0346759	2.12765	9.07641e-05	0.000124408	0.0166366	0.000471772	0.00255002	0.00217884	0.000531403	0.00313763	0.00990276	0.00887446	0.00761093	0.0106775	0.000704269	0.000106456	5.86263e-05	9.46557e-05	291		7.38572	37	-0.0387868	0.00106685	1.22717	0.0323962	724.464	5.68863	0.128814	0.123077	22.5526	0.322885	3.80321	3.74137	0.237184	9.0835	17.2575	11.0757	14.3792	2.1147	0.423402	0.110748	0.0259479
JP1	1.75166	1	0.00163452	0.00140125	0.00558909	0.00661637	0.0335339	2.21322	-1.17934e-05	5.66845e-05	0.0180839	0.000373078	0.00209263	0.00275316	0.000364328	0.00385929	0.011626	0.0088951	0.00969074	0.0132019	0.000711409	3.85505e-05	0.000128206	0.000130108	292		7.51109	37	-0.0557593	0.000609706	1.27099	0.035911	700.606	5.91742	-0.0167374	0.0560778	24.5146	0.255338	3.12104	4.72754	0.162613	11.1727	20.2606	11.1015	18.3085	2.61467	0.427694	0.0401047	0.0567436
JP1	1.84763	1	0.000105303	-0.0020709	0.00482806	0.00543193	0.0329831	2.1932	0.000158358	-1.21237e-05	0.0182323	0.000197728	0.00236849	0.00240724	0.000189104	0.00380376	0.0116971	0.0113879	0.0100959	0.0138965	0.000803162	3.79958e-05	0.000126361	0.000264221	293		7.92261	37	-0.00359228	-0.000901082	1.09793	0.0294823	689.098	5.86391	0.224744	-0.0119939	24.7158	0.135327	3.53246	4.13355	0.0844041	11.012	20.3844	14.2126	19.074	2.75225	0.482856	0.0395277	0.0559271
JP1	1.78113	1	-0.00160631	0.00196438	0.00554819	0.00676621	0.0317483	2.15448	-1.16353e-05	2.18944e-05	0.0175005	0.000368076	0.00189443	0.00285236	0.000223323	0.00421625	0.0122539	0.0137163	0.0126613	0.0168734	0.000872022	-3.00266e-05	2.43966e-05	0.000128364	294		7.63745	37	0.054797	0.000854733	1.26169	0.0367243	663.3	5.76039	-0.016513	0.0216601	23.7237	0.251914	2.82543	4.8979	0.0996771	12.2061	21.3548	17.1186	23.9208	3.34182	0.524254	-0.0312372	0.0107979
JP1	1.67021	1	-0.000913939	-0.00145864	0.00471789	0.00555635	0.0298609	2.06435	8.64761e-05	8.59977e-05	0.0180021	0.000156686	0.00177856	0.0027269	0.000180966	0.00487698	0.0119429	0.0132434	0.0131145	0.0182156	0.000963796	0.000101427	8.83899e-05	2.51176e-05	295		7.16186	37	0.0311778	-0.000634679	1.07287	0.0301577	623.866	5.5194	0.122729	0.0850774	24.4037	0.107237	2.65262	4.68245	0.0807717	14.1189	20.8129	16.5284	24.777	3.60764	0.579428	0.105516	0.0391211
JP1	1.74645	1	0.000100728	-0.000640805	0.00552982	0.00600989	0.0286045	2.07453	5.39198e-05	0.000183519	0.0194281	0.000384253	0.00239599	0.00253061	0.000343485	0.00289024	0.0120032	0.0117725	0.0141511	0.0183703	0.00171133	0.000101384	2.33134e-05	0.000155184	296		7.48875	37	-0.00343621	-0.000278825	1.25751	0.0326193	597.619	5.54662	0.076524	0.181555	26.3368	0.262986	3.57348	4.34541	0.15331	8.36729	20.9178	14.6925	26.7355	3.6383	1.02884	0.105471	0.0103185
JP1	1.71358	1	-0.0014907	0.000477452	0.00613753	0.00603009	0.0281518	2.1885	8.76784e-05	2.12223e-05	0.0187811	0.000224835	0.00249631	0.00296272	0.000315424	0.00336082	0.0117788	0.0127999	0.0140235	0.0210113	0.000812268	6.98517e-05	0.000122604	0.000190394	297		7.3478	37	0.0508531	0.000207748	1.39571	0.0327289	588.159	5.85133	0.124435	0.0209952	25.4597	0.153879	3.72311	5.0874	0.140785	9.72963	20.5268	15.9748	26.4944	4.16135	0.48833	0.0726679	0.0542643
JP1	1.762	1	0.000375513	0.00330002	0.00545836	0.00625917	0.0279363	2.2386	5.5854e-05	5.53587e-05	0.0189097	0.000364352	0.00234686	0.00326142	0.000355806	0.00366797	0.0138843	0.013679	0.0145237	0.0208167	0.000930571	0.000206078	-9.53606e-06	0.000228122	298		7.55542	37	-0.0128101	0.00143589	1.24126	0.0339723	583.656	5.98528	0.0792691	0.0547662	25.634	0.249366	3.50021	5.60031	0.158809	10.6188	24.196	17.0719	27.4393	4.12281	0.559453	0.214386	-0.00422064
JP1	1.83437	1	-0.00228554	0.0062984	0.00536523	0.00634238	0.0291449	2.14549	0.000124189	8.97405e-05	0.0194319	0.00033325	0.00253529	0.00281163	0.000324638	0.00359479	0.0134829	0.0129018	0.0143653	0.0211156	0.00127734	0.00017374	0.000160135	0.000128058	299		7.86576	37	0.077968	0.00274054	1.22009	0.0344239	608.908	5.73634	0.176251	0.0887801	26.342	0.22808	3.78124	4.82795	0.144898	10.407	23.4965	16.1021	27.1401	4.18199	0.767926	0.180744	0.0708753
JP1	1.73799	1	-0.00296087	0.0145167	0.00468153	0.00595137	0.0287603	2.06791	0.000185212	5.37944e-05	0.0188346	0.000157653	0.00224781	0.00218692	0.000313019	0.00343339	0.0126723	0.0131939	0.0134249	0.021146	0.000707872	0.000429393	8.89353e-05	0.000188942	300		7.4525	37	0.101006	0.00631646	1.06461	0.0323017	600.873	5.52891	0.262856	0.0532187	25.5323	0.107899	3.35248	3.75524	0.139712	9.93973	22.0839	16.4666	25.3634	4.18803	0.425568	0.446704	0.0393625
JP1	1.70952	1	-0.000779553	0.0176473	0.00416655	0.00599515	0.0301028	1.99661	0.000331381	0.00011328	0.0181703	0.000336296	0.00207287	0.00301028	0.000235133	0.00288806	0.0114763	0.0129058	0.0126579	0.0194317	0.000703455	0.000221301	5.33821e-05	0.000148373	301		7.33039	37	0.0265934	0.00767865	0.947498	0.0325393	628.922	5.33828	0.470302	0.112067	24.6317	0.230164	3.09157	5.16907	0.104948	8.36098	19.9997	16.107	23.9143	3.84851	0.422913	0.230224	0.0236268
JP1	1.84843	1	-0.00184926	0.0248447	0.00502131	0.00645355	0.030619	2.17292	0.00028978	0.000222349	0.018587	0.000194663	0.00249946	0.00263801	0.000253111	0.00367786	0.0125212	0.0107756	0.0120841	0.0198117	0.000556427	0.000204753	5.74638e-05	0.000126248	302		7.92607	37	0.063085	0.0108104	1.14188	0.0350273	639.705	5.80968	0.411261	0.21997	25.1966	0.133229	3.72779	4.52982	0.112973	10.6475	21.8206	13.4484	22.8303	3.92376	0.33452	0.213008	0.0254333
JP1	1.80334	1	0.000135869	0.0283	0.0052607	0.00581518	0.0281311	2.25655	0.00018716	0.000219752	0.0196295	0.000225468	0.00207299	0.00207761	0.000183998	0.00317181	0.0105202	0.0110473	0.0123733	0.0165341	0.000682241	0.000268518	2.37143e-05	9.16951e-05	303		7.73269	37	-0.004635	0.0123138	1.19631	0.0315625	587.727	6.03329	0.265621	0.2174	26.6098	0.154312	3.09175	3.56754	0.0821252	9.18244	18.3335	13.7876	23.3767	3.27463	0.410159	0.279344	0.0104959
JP1	1.8602	1	-0.00146474	0.0301554	0.0042461	0.00644431	0.0296182	2.08233	0.000248207	0.000377375	0.0189088	0.000415386	0.00229046	0.00235981	0.000245109	0.0028158	0.01073	0.00985086	0.0109881	0.0166871	0.000960179	0.00019828	-9.1752e-06	8.98455e-05	304		7.97652	37	0.0499676	0.0131212	0.965588	0.0349771	618.796	5.56746	0.35226	0.373336	25.6328	0.284294	3.41609	4.05212	0.109401	8.1518	18.6991	12.2943	20.7595	3.30492	0.577253	0.206274	-0.00406092
JP1	1.78669	1	-0.000332792	0.0278253	0.00454614	0.00550922	0.0276603	1.92101	0.000171452	0.000261912	0.0176784	0.000267148	0.001899	0.00196384	0.000289764	0.0029359	0.010153	0.010211	0.00975731	0.0141758	0.000655282	0.000458096	2.17239e-05	5.3697e-05	305		7.66132	37	0.0113528	0.0121073	1.03382	0.0299019	577.891	5.13615	0.243328	0.259109	23.9648	0.182839	2.83225	3.37218	0.129332	8.49948	17.6936	12.7438	18.4343	2.80756	0.393951	0.476565	0.00961495
JP1	1.88018	1	9.74414e-05	0.0318798	0.00402687	0.00543596	0.0283673	2.02545	0.000177993	0.00033482	0.0181319	0.000308798	0.0021602	0.00241657	0.000237902	0.00317373	0.00858772	0.00792381	0.00934215	0.0139295	0.000774655	0.000412656	-8.90541e-06	0.000181578	306		8.06218	37	-0.00332408	0.0138714	0.915734	0.0295042	592.661	5.4154	0.25261	0.331237	24.5797	0.211344	3.22181	4.14959	0.106184	9.18802	14.9658	9.88927	17.65	2.75878	0.465718	0.429293	-0.00394151
JP1	2.02381	1	0.00061002	0.0275949	0.00489482	0.00696759	0.0344135	2.23537	0.00032376	0.000323267	0.0193555	0.000262015	0.00169854	0.00264218	0.000253511	0.00365015	0.00975526	0.00965186	0.0108277	0.0139039	0.000724917	0.000372688	-9.48973e-06	2.58811e-05	307		8.67807	37	-0.02081	0.012007	1.11311	0.0378173	718.981	5.97665	0.459486	0.319807	26.2384	0.179325	2.53327	4.53698	0.113151	10.5673	17.0004	12.046	20.4566	2.7537	0.435815	0.387713	-0.00420013
JP1	1.98727	1	-0.00129188	0.0234204	0.00531226	0.00702144	0.0326357	2.22284	0.000219635	0.000285125	0.0186171	0.000356801	0.00239719	0.00253408	8.4531e-05	0.00306415	0.0100289	0.00807785	0.0101926	0.0126589	0.000911285	0.000399733	2.36493e-05	9.14438e-05	308		8.52139	37	0.0440707	0.0101906	1.20804	0.0381096	681.839	5.94315	0.31171	0.282074	25.2374	0.244198	3.57526	4.35136	0.0377293	8.87077	17.4773	10.0815	19.2567	2.50713	0.547859	0.415849	0.0104671
JP1	2.06114	1	-0.00100601	0.0245375	0.004813	0.00617627	0.0307416	2.31478	8.88321e-05	0.000255438	0.0189614	0.000160954	0.0017936	0.00216588	0.000352994	0.0031711	0.00975882	0.00821702	0.00851936	0.0129249	0.000956635	0.000371547	2.39589e-05	5.92214e-05	309		8.83815	37	0.0343187	0.0106767	1.0945	0.0335224	642.267	6.18898	0.126072	0.252705	25.7041	0.110159	2.67505	3.71912	0.157554	9.1804	17.0066	10.2552	16.0955	2.55981	0.575123	0.386526	0.0106041
JP1	2.05299	1	0.000995953	0.0212274	0.00391432	0.0059147	0.0319138	2.15461	0.000251906	0.000382999	0.0188939	0.000290001	0.00206145	0.00213183	0.00031455	0.00285777	0.00891396	0.00825264	0.00848444	0.0115369	0.00113896	0.000135447	-9.31195e-06	9.11845e-05	310		8.8032	37	-0.0339756	0.00923641	0.89014	0.0321027	666.758	5.76074	0.35751	0.3789	25.6126	0.198479	3.07453	3.66065	0.140395	8.27329	15.5343	10.2997	16.0295	2.28491	0.684735	0.140907	-0.00412144
JP1	1.96949	1	-0.000548612	0.0208956	0.00489964	0.00453651	0.0304248	2.04951	0.000279039	0.000214107	0.0182857	0.000316362	0.0020842	0.00224984	0.000179272	0.00270326	0.00895922	0.00740823	0.00740941	0.0108842	0.000922545	0.000164935	2.31051e-05	0.000153797	311		8.44516	37	0.0187152	0.00909203	1.11421	0.0246224	635.647	5.47972	0.396017	0.211816	24.7882	0.216521	3.10846	3.86329	0.0800156	7.826	15.6132	9.2458	13.9985	2.15564	0.554628	0.171585	0.0102263
JP1	1.98847	1	0.000200066	0.020081	0.00464452	0.00565123	0.0343311	2.22841	0.000185041	0.000315376	0.0181946	0.00035373	0.0025077	0.00228302	0.000410842	0.00307049	0.00742211	0.0082703	0.00656959	0.0110773	0.000772628	0.00020007	2.34458e-05	9.06569e-05	312		8.52653	37	-0.00682497	0.00873757	1.05619	0.0306726	717.261	5.95804	0.262614	0.312	24.6647	0.242096	3.74009	3.92025	0.183374	8.88912	12.9345	10.3217	12.4118	2.1939	0.464499	0.208137	0.010377
JP1	2.02963	1	-0.000690013	0.0135438	0.00452331	0.00549946	0.0327892	2.19991	5.43452e-05	0.000283294	0.0152796	0.000288957	0.00205403	0.00176363	0.000280643	0.00324112	0.00878324	0.00599223	0.00615764	0.0089372	0.000872656	6.94076e-05	-9.27845e-06	-7.47096e-06	313		8.70304	37	0.0235388	0.00589313	1.02863	0.0298489	685.046	5.88183	0.0771277	0.280262	20.713	0.197765	3.06347	3.02839	0.125261	9.38311	15.3065	7.47857	11.6335	1.77004	0.524635	0.0722059	-0.00410662
JP1	1.94844	1	-0.000163491	0.0151727	0.00485331	0.00547303	0.0291705	2.19892	0.000285819	0.000153286	0.0185313	0.00032405	0.00223388	0.00256894	0.000117604	0.00276895	0.00835097	0.00689434	0.00583851	0.00682177	0.00114303	6.99073e-05	-9.34525e-06	9.15106e-05	314		8.35491	37	0.00557727	0.0066019	1.10367	0.0297054	609.442	5.8792	0.40564	0.151646	25.1211	0.221782	3.3317	4.41122	0.0524912	8.01617	14.5532	8.60444	11.0306	1.35107	0.687184	0.0727258	-0.00413618
JP1	1.94501	1	-0.000797209	0.01349	0.00536843	0.00489574	0.0314765	2.21642	2.1803e-05	0.000352624	0.018565	0.000225825	0.00230819	0.00171647	0.000416205	0.00291146	0.00871271	0.00555983	0.00503063	0.00668071	0.000848976	0.000202682	2.37518e-05	5.87097e-05	315		8.34017	37	0.0271957	0.00586974	1.22081	0.0265721	657.621	5.926	0.0309432	0.34885	25.1668	0.154557	3.44253	2.94741	0.185768	8.42872	15.1836	6.93892	9.50427	1.32313	0.510399	0.210854	0.0105125
JP1	2.00326	1	-0.000339228	0.0110281	0.00455387	0.00474936	0.0346462	2.259	0.000260239	0.000191775	0.0197914	0.000163664	0.00253776	0.00216837	0.000223008	0.0027484	0.00863044	0.00519265	0.00393621	0.00542447	0.000870795	0.000105945	-9.61997e-06	6.02185e-05	316		8.58998	37	0.0115723	0.0047985	1.03558	0.0257777	723.843	6.03983	0.369336	0.189722	26.8293	0.112013	3.78493	3.72338	0.0995368	7.95668	15.0402	6.48065	7.43661	1.07433	0.523516	0.110216	-0.00425778
JP1	1.91064	1	-0.000701208	0.00634691	0.00503036	0.00415479	0.0333212	2.10911	0.000121842	0.00015466	0.0206335	0.000326953	0.00275384	0.00185886	0.000485041	0.00312717	0.00865928	0.00528973	0.00395799	0.00448408	0.000786891	0.000103841	-9.42898e-06	2.57154e-05	317		8.19281	37	0.0239207	0.00276165	1.14393	0.0225506	696.16	5.63908	0.17292	0.153005	27.9709	0.223769	4.10719	3.19191	0.216492	9.05321	15.0905	6.60182	7.47775	0.888085	0.473074	0.108028	-0.00417324
JP1	1.8283	1	-0.000198066	0.00439803	0.00439247	0.00395101	0.0363379	2.1481	5.51719e-05	0.000154506	0.0188122	0.000426451	0.0023182	0.00165736	0.000218363	0.00285753	0.00708509	0.00465192	0.00365424	0.00374725	0.00108558	3.91464e-06	5.71292e-05	0.000125513	318		7.83975	37	0.00675675	0.00191366	0.998874	0.0214445	759.188	5.74332	0.078301	0.152852	25.5018	0.291867	3.45746	2.84591	0.0974635	8.2726	12.3472	5.8058	6.9039	0.742153	0.652642	0.00407246	0.0252852
JP1	1.85011	1	0.0010813	0.00484772	0.00525576	0.00413955	0.0363608	2.2349	5.73219e-05	5.68135e-05	0.0202381	0.000166501	0.00202826	0.00217137	0.000330586	0.00296889	0.0079496	0.00389909	0.0031398	0.00323643	0.00105874	4.06719e-06	2.47844e-05	9.58331e-05	319		7.93327	37	-0.036887	0.00210933	1.19519	0.0224678	759.666	5.9754	0.0813524	0.0562055	27.4348	0.113954	3.02503	3.72854	0.147553	8.59498	13.8537	4.86624	5.93196	0.640984	0.636508	0.00423116	0.0109695
JP1	1.83258	1	-3.14993e-05	0.000460098	0.00539629	0.00402031	0.0325438	2.17184	2.24708e-05	5.61143e-05	0.019989	0.000198597	0.00285728	0.00214465	8.74982e-05	0.00344487	0.0072706	0.00573014	0.00275936	0.00374293	0.000738399	4.01713e-06	-9.66622e-06	9.46537e-05	320		7.85808	37	0.00107456	0.000200197	1.22715	0.0218207	679.919	5.80678	0.031891	0.0555138	27.0972	0.135922	4.26146	3.68265	0.0390536	9.97297	12.6704	7.15147	5.2132	0.741297	0.443921	0.00417909	-0.00427825
JP1	1.6466	1	-0.00170045	0.00229328	0.00475961	0.00363229	0.0312111	1.96951	5.29557e-05	2.05482e-05	0.020105	0.000249631	0.00238509	0.00184629	0.000113778	0.00229561	0.00750376	0.00519994	0.00299645	0.00334122	0.000882281	3.75739e-06	-9.04121e-06	5.65956e-05	321		7.06059	37	0.0580084	0.000997845	1.08236	0.0197146	652.077	5.26584	0.0751557	0.0203283	27.2544	0.17085	3.55722	3.17032	0.0507834	6.64584	13.0768	6.48976	5.66114	0.661738	0.530422	0.00390887	-0.00400162
JP1	1.77951	1	-0.00104145	0.000929582	0.00632268	0.0038278	0.0328485	2.04709	5.21343e-05	2.02295e-05	0.0203289	0.000182875	0.00209624	0.00206919	0.000174898	0.00273164	0.00814293	0.0052765	0.00361026	0.00404433	0.000900039	3.51415e-05	2.25414e-05	0.000118603	322		7.63053	37	0.0355277	0.000404477	1.43781	0.0207758	686.285	5.47326	0.07399	0.020013	27.558	0.125161	3.12642	3.55308	0.0780636	7.90816	14.1906	6.58531	6.82081	0.800991	0.541098	0.0365583	0.00997679
JP1	1.63338	1	-0.0001304	-2.0024e-05	0.0051276	0.00382816	0.0342214	2.14188	-4.43843e-05	2.12802e-05	0.0220145	0.000390825	0.00270157	0.00204435	0.000250133	0.00323768	0.00734074	0.00545132	0.00340087	0.00329486	0.000913709	3.69667e-05	2.37122e-05	0.000124763	323		7.00393	37	0.00444841	-8.7128e-06	1.16605	0.0207777	714.97	5.72668	-0.0629911	0.0210524	29.8429	0.267484	4.02924	3.51044	0.111644	9.37314	12.7927	6.80349	6.42519	0.652557	0.549316	0.0384571	0.0104949
JP1	1.72844	1	-0.00075665	-0.00107532	0.00498782	0.00337011	0.0342758	2.16792	-1.12177e-05	2.11085e-05	0.0226591	0.000256438	0.00166239	0.00163416	0.000346542	0.00239102	0.00701906	0.005867	0.00334063	0.00307144	0.00123443	3.66685e-05	-9.28775e-06	0.000156565	324		7.41155	37	0.0258121	-0.000467889	1.13426	0.0182916	716.105	5.79632	-0.0159203	0.0208826	30.7168	0.175509	2.47935	2.80608	0.154674	6.92205	12.2321	7.32228	6.31139	0.608307	0.742129	0.0381469	-0.00411073
JP1	1.72491	1	0.000270355	-0.00282516	0.00518376	0.00384528	0.0358473	2.16835	5.50873e-05	2.13753e-05	0.0235452	0.000292903	0.00248109	0.0014887	0.000218028	0.00291959	0.00820482	0.00524314	0.00328318	0.00397407	0.00108391	7.03554e-05	-9.40515e-06	0.000324661	325		7.39638	37	-0.0092228	-0.00122928	1.17882	0.0208706	748.937	5.79747	0.0781809	0.0211466	31.918	0.200466	3.7004	2.5563	0.097314	8.45228	14.2985	6.54367	6.20286	0.787075	0.651641	0.0731919	-0.00416269
JP1	1.80619	1	0.000846538	0.00092426	0.00536812	0.00354649	0.033151	2.11481	2.20742e-05	5.51238e-05	0.027404	0.00029572	0.0018673	0.00140239	0.000220125	0.00251161	0.0073774	0.00468945	0.00371727	0.00454931	0.00109434	3.74891e-05	5.75902e-05	0.000227154	326		7.74493	37	-0.0288785	0.000402162	1.22074	0.019249	692.606	5.65432	0.0313281	0.0545338	37.149	0.202393	2.78497	2.40809	0.0982499	7.27116	12.8565	5.85265	7.02297	0.901003	0.657908	0.0390005	0.0254893
JP1	1.65686	1	-0.00120805	0.00150923	0.00392621	0.00271389	0.033654	1.97159	2.08375e-05	0.00017869	0.0262499	0.000532461	0.00223764	0.00148214	0.000366111	0.00246589	0.00769297	0.00487002	0.00338236	0.00540298	0.00115968	0.00013038	2.27e-05	0.000151101	327		7.10459	37	0.0412109	0.000656694	0.892843	0.0147299	703.113	5.27139	0.0295729	0.176778	35.5845	0.364421	3.33731	2.54503	0.163409	7.1388	13.4065	6.078	6.39022	1.07007	0.697192	0.135636	0.010047
JP1	1.6552	1	-0.000739767	0.0045948	0.00429851	0.0030383	0.0322834	2.02687	-1.09674e-05	0.000213097	0.0272678	0.000250716	0.00245961	0.00146939	0.000370886	0.0025622	0.00859586	0.00547916	0.00576935	0.00502405	0.000982346	3.58503e-05	-9.08051e-06	0.000185148	328		7.09748	37	0.0252361	0.00199928	0.977505	0.0164907	674.48	5.41919	-0.0155651	0.210817	36.9644	0.171593	3.66836	2.52315	0.16554	7.41763	14.98	6.83823	10.8999	0.995027	0.59058	0.0372957	-0.00401901
JP1	1.65301	1	-0.00120791	0.00647935	0.00516176	0.00322045	0.0340328	2.06468	5.2495e-05	0.000147009	0.0324091	0.000437419	0.00188912	0.00151362	0.000366068	0.0026239	0.0087378	0.00740414	0.00629626	0.00768281	0.0127202	0.000193684	0.000117677	0.00284281	329		7.08811	37	0.041206	0.00281928	1.17381	0.0174793	711.028	5.52028	0.0745018	0.145436	43.934	0.299374	2.81751	2.5991	0.163389	7.59624	15.2273	9.2407	11.8954	1.5216	7.64728	0.201493	0.0520836
JP1	1.72544	1	0.00127611	0.00758929	0.00506293	0.00362959	0.0330826	2.08083	8.40911e-05	0.000146898	1.13309	0.000405452	0.00223568	0.00141757	0.000239247	0.00281173	0.0098397	0.00907681	0.00882489	0.0125834	0.307472	9.86296e-05	0.00125648	0.0262617	330		7.39867	37	-0.0435329	0.00330223	1.15134	0.0197	691.176	5.56346	0.119344	0.145326	1536.03	0.277495	3.33439	2.43416	0.106785	8.14	17.1476	11.3283	16.6727	2.49218	184.85	0.102606	0.556115
JP1	1.73787	1	-0.000222634	0.00960357	0.00447723	0.00411694	0.0338573	2.01883	8.49956e-05	0.000148478	9.76827	0.000313884	0.00146033	0.00168863	0.00024182	0.00281	0.010586	0.0191677	0.0181437	0.031225	1.25488	0.000227595	0.00571661	0.101958	331		7.45196	37	0.00759487	0.00417868	1.01815	0.0223451	707.362	5.39771	0.120627	0.146889	13241.9	0.214825	2.17799	2.8996	0.107933	8.13499	18.4482	23.9221	34.2785	6.1842	754.423	0.236771	2.53016
JP1	1.61816	1	0.00172336	0.00984619	0.00412183	0.00350276	0.0318957	1.93053	0.000142213	0.000294416	30.8982	0.000238631	0.00197437	0.00149015	0.000353008	0.00372158	0.0163762	0.0298146	0.0329112	0.0592029	2.69354	0.000125713	0.0095837	0.204792	332		6.93865	37	-0.0587902	0.00428425	0.937329	0.0190116	666.378	5.1616	0.201832	0.291265	41885.8	0.163321	2.94466	2.5588	0.15756	10.7741	28.5387	37.21	62.1785	11.7253	1619.34	0.130782	4.24172
JP1	1.42136	1	0.000841701	0.00806923	0.00364195	0.00396867	0.027531	1.7026	0.000185092	0.000295881	51.6927	0.000328484	0.00204825	0.00174606	0.000349232	0.0032219	0.0213767	0.0384005	0.0460347	0.0738706	4.06477	0.000225667	0.0149919	0.316794	333		6.09479	37	-0.0287135	0.00351106	0.828201	0.0215404	575.189	4.55219	0.262686	0.292715	70074.9	0.224818	3.05484	2.99822	0.155875	9.32747	37.2531	47.9255	86.9725	14.6303	2443.71	0.234765	6.63539
JP1	1.36043	1	0.0048819	0.00728516	0.00342232	0.00256597	0.0288241	1.66773	0.000237051	0.000619956	76.0192	0.000323516	0.00179796	0.00163751	0.000699878	0.00374841	0.0286081	0.0551786	0.0649805	0.104376	5.41	0.000249633	0.0179212	0.397528	334		5.8335	37	-0.166539	0.0031699	0.778256	0.0139271	602.206	4.45896	0.336427	0.613321	103052	0.221417	2.68156	2.81183	0.312381	10.8517	49.8552	68.8654	122.767	20.672	3252.46	0.259697	7.93187
JP1	1.28711	1	0.0047237	0.00710209	0.00404211	0.00253157	0.0264649	1.51635	0.000353832	0.000534795	86.9944	0.000565178	0.00180487	0.0018344	0.000739951	0.00505013	0.0364386	0.0703497	0.0705089	0.119888	5.81935	0.000184392	0.0186714	0.382066	335		5.51913	37	-0.161143	0.00309024	0.919199	0.0137404	552.916	4.05421	0.502164	0.529072	117930	0.386813	2.69186	3.14992	0.330267	14.6202	63.5013	87.7995	133.211	23.7441	3498.56	0.191827	8.26392
JP1	1.33068	1	0.00623078	0.00533696	0.00367771	0.00333594	0.025319	1.63883	0.000296933	0.000435822	100.546	0.000579935	0.00216413	0.00227946	0.000628588	0.00584911	0.0426598	0.0764144	0.0797391	0.138092	6.26602	0.000393315	0.0216999	0.416334	336		5.70595	37	-0.212555	0.0023222	0.836332	0.0181062	528.975	4.38169	0.421412	0.431158	136301	0.396913	3.22767	3.91414	0.280562	16.9333	74.343	95.3686	150.65	27.3495	3767.09	0.409173	9.60434
JP1	1.2599	1	0.00932688	0.00284969	0.00341443	0.00247509	0.0260997	1.50649	0.000498294	0.000638974	99.7667	0.000587412	0.00174024	0.0019135	0.00111641	0.00544451	0.0467583	0.0838453	0.0859315	0.138591	6.0312	0.000144415	0.0221781	0.388889	337		5.40243	37	-0.318174	0.00123995	0.776461	0.0134338	545.287	4.02786	0.707188	0.632136	135244	0.40203	2.59547	3.28574	0.498297	15.762	81.4855	104.643	162.349	27.4483	3625.92	0.150237	9.81596
JP1	1.18537	1	0.00441493	0.00505848	0.003142	0.00236255	0.0229984	1.44534	0.000404042	0.000596588	90.2224	0.000546222	0.00156205	0.00153834	0.00053923	0.00575953	0.0477265	0.0813431	0.0804262	0.13151	5.4962	0.000223759	0.0193413	0.341854	338		5.08288	37	-0.150609	0.00220103	0.71451	0.012823	480.492	3.86436	0.573424	0.590203	122306	0.373839	2.32971	2.64154	0.240678	16.6739	83.1726	101.52	151.948	26.0459	3304.28	0.23278	8.56043
JP1	1.32793	1	0.00570074	0.00326015	0.00373311	0.00274715	0.0255548	1.71304	0.000286154	0.000789402	91.2322	0.000646379	0.002183	0.00186093	0.000668492	0.00622042	0.0458447	0.0837802	0.0787237	0.128149	5.00453	0.000240513	0.0175817	0.298901	339		5.69414	37	-0.194473	0.00141855	0.848931	0.0149105	533.902	4.58011	0.406115	0.780954	123675	0.442388	3.25581	3.19547	0.298372	18.0082	79.8932	104.561	148.731	25.3802	3008.69	0.25021	7.78163
JP1	1.3722	1	0.0073513	0.00242818	0.00345281	0.00329494	0.0237248	1.68073	0.000259982	0.000499762	71.7594	0.000534978	0.00212203	0.00158573	0.00079761	0.00504218	0.0458886	0.0791146	0.0715088	0.114232	3.76498	0.000153671	0.0133355	0.231653	340		5.88399	37	-0.250779	0.00105654	0.785188	0.0178836	495.669	4.49372	0.368972	0.494414	97277.3	0.366144	3.16488	2.72291	0.356002	14.5972	79.9697	98.7386	135.1	22.6239	2263.48	0.159867	5.90226
JP1	1.47773	1	0.00589658	0.00110824	0.00414119	0.00347872	0.022972	1.88113	0.000300704	0.000455922	51.8669	0.000616976	0.00192007	0.00179988	0.000204323	0.00522811	0.0438866	0.0731384	0.0652602	0.0961317	2.69821	0.000128203	0.00905676	0.165055	341		6.3365	37	-0.201154	0.000482213	0.94173	0.0188811	479.94	5.02953	0.426765	0.451042	70311	0.422264	2.86367	3.09063	0.091197	15.1355	76.4809	91.28	123.295	19.0391	1622.15	0.133372	4.0085
JP1	1.52588	1	0.00424732	-0.000709734	0.00331008	0.00230172	0.022603	1.89743	0.0002704	0.00026994	36.98	0.000556415	0.00211336	0.00164927	0.000204953	0.00468175	0.0407887	0.0652702	0.0546085	0.0794734	1.69198	9.73668e-05	0.00645845	0.106732	342		6.54294	37	-0.144891	-0.000308817	0.752732	0.0124928	472.231	5.07312	0.383756	0.267051	50130.3	0.380815	3.15196	2.83201	0.0914778	13.5537	71.0823	81.4601	103.171	15.7399	1017.21	0.101292	2.85849
JP1	1.75311	1	0.00564185	-0.000253362	0.00434147	0.00267466	0.0226853	1.95131	8.80866e-05	0.000187017	23.904	0.00029216	0.00154657	0.00128609	0.000283753	0.00440411	0.0382872	0.0641163	0.0535097	0.0721795	1.11572	0.000103316	0.00360344	0.0668655	343		7.5173	37	-0.192464	-0.000110242	0.987275	0.014517	473.951	5.21716	0.125014	0.185015	32404.4	0.199957	2.30662	2.20839	0.126649	12.75	66.7229	80.02	101.095	14.2953	670.762	0.107481	1.59487
JP1	1.64961	1	0.00453672	0.000144393	0.00437322	0.00247074	0.0206678	1.99922	0.000249915	0.000151533	14.4759	0.000483513	0.00194725	0.00142966	0.000148893	0.00534931	0.038818	0.0565675	0.0475411	0.0634462	0.675724	6.91076e-05	0.00227548	0.0412134	344		7.07353	37	-0.154764	6.28278e-05	0.994496	0.0134102	431.801	5.34527	0.354684	0.149911	19623.5	0.330921	2.90421	2.45493	0.0664565	15.4864	67.6478	70.5988	89.8186	12.5657	406.241	0.0718938	1.00712
JP1	1.61902	1	0.00396356	-0.000657287	0.00345811	0.00306887	0.0189157	2.04717	0.000211257	0.000179061	8.27165	0.00040665	0.00186154	0.00100927	0.000144765	0.00453437	0.0343325	0.0507846	0.0430334	0.0567517	0.437777	9.89211e-05	0.00110155	0.0231248	345		6.94233	37	-0.135211	-0.000285997	0.786394	0.0166566	395.196	5.47347	0.29982	0.177145	11213.1	0.278315	2.77637	1.73306	0.0646141	13.1271	59.831	63.3815	81.3021	11.2398	263.189	0.102909	0.487542
JP1	1.70713	1	0.0035959	-0.000484997	0.00462734	0.00326253	0.018043	2.14272	0.000220038	0.000120408	4.76441	0.000390504	0.00190587	0.00141476	0.000349072	0.00432594	0.0357595	0.0521642	0.0389445	0.0500604	0.239096	0.000103033	0.0008499	0.01597	346		7.32014	37	-0.122669	-0.00021103	1.05228	0.0177077	376.962	5.72894	0.312283	0.119119	6458.65	0.267265	2.84249	2.42933	0.155804	12.5237	62.3179	65.1033	73.5771	9.91461	143.743	0.107187	0.376164
JP1	1.72909	1	0.0049296	-0.0033106	0.00519824	0.00275762	0.0163931	2.15435	8.97073e-05	0.00012296	3.72031	0.000297535	0.00174377	0.00114101	8.64813e-05	0.0049917	0.0345186	0.0492309	0.03977	0.0465192	0.180404	7.1468e-05	0.000699171	0.00809573	347		7.41432	37	-0.168167	-0.0014405	1.18211	0.0149673	342.491	5.76004	0.127314	0.121644	5043.27	0.203636	2.60073	1.95926	0.0385998	14.4511	60.1553	61.4423	75.1367	9.21326	108.458	0.0743494	0.309451
JP1	1.73381	1	0.00162765	0.0017382	0.00467529	0.00241134	0.0151211	2.11746	0.000257549	0.000223423	1.90673	0.000330127	0.00163679	0.0010025	0.000287965	0.00463797	0.0347693	0.0484503	0.0361523	0.045514	0.0972104	3.95658e-06	0.00036042	0.00554312	348		7.43455	37	-0.0555252	0.000756322	1.06319	0.0130878	315.916	5.66141	0.365518	0.221032	2584.77	0.225942	2.44118	1.72143	0.128529	13.427	60.5923	60.4681	68.3019	9.01417	58.4423	0.0041161	0.159521
JP1	1.72885	1	0.00261379	-0.000223535	0.00384004	0.00312358	0.0137616	2.17283	0.000156923	0.000122739	1.15642	0.000195937	0.00234703	0.00137478	0.000120014	0.00451078	0.033983	0.0486686	0.0352333	0.0424168	0.0587016	0.000105028	0.000125216	0.00460896	349		7.41328	37	-0.0891658	-9.72641e-05	0.873248	0.0169536	287.513	5.80945	0.222708	0.121426	1567.64	0.134101	3.50046	2.36068	0.0535668	13.0588	59.222	60.7406	66.5656	8.40076	35.291	0.109263	0.0554204
JP1	1.64913	1	0.00531315	-0.000250458	0.00461964	0.00238161	0.0113786	2.08312	0.000218114	0.000184873	0.664591	0.000190534	0.00179092	0.00123859	0.000214983	0.00412432	0.0307774	0.044659	0.0320256	0.0355346	0.0368485	3.66134e-05	8.90042e-05	0.0018929	350		7.07144	37	-0.181251	-0.000108979	1.05053	0.0129264	237.726	5.56959	0.309552	0.182895	900.922	0.130403	2.67106	2.12683	0.0959548	11.94	53.6355	55.7364	60.5053	7.03772	22.1531	0.0380895	0.039393
JP1	1.7463	1	0.00296634	-0.00167397	0.00487631	0.00274513	0.011631	2.09026	0.000242445	0.000210321	0.382942	0.000184133	0.00166744	0.00145025	0.000144443	0.00408073	0.028949	0.0411539	0.03006	0.0336427	0.0227979	9.87007e-05	0.000149331	0.00189262	351		7.48811	37	-0.101193	-0.000728372	1.1089	0.0148995	243.001	5.58869	0.344083	0.20807	519.118	0.126022	2.48688	2.49027	0.0644701	11.8138	50.4493	51.362	56.7918	6.66302	13.706	0.10268	0.0660937
JP1	1.84538	1	0.0053624	0.00154794	0.00457749	0.0026348	0.0109948	2.1883	0.000327462	0.000191341	0.35514	0.000231105	0.00175186	0.00155317	8.68826e-05	0.00406518	0.030051	0.042167	0.032159	0.0343318	0.0129778	0.000241327	9.2118e-05	0.00124677	352		7.91298	37	-0.182931	0.000673535	1.04095	0.0143006	229.708	5.8508	0.46474	0.189294	481.429	0.158171	2.6128	2.667	0.0387789	11.7688	52.3697	52.6263	60.7574	6.79952	7.80217	0.251056	0.0407712
JP1	1.93767	1	0.00400889	0.00658869	0.00456246	0.00316162	0.00948641	2.10044	0.000247769	0.000214939	0.184295	0.000188176	0.00183346	0.00128797	0.000179968	0.00349058	0.0283187	0.0378972	0.0263701	0.0321447	0.0118336	0.000489114	-9.159e-06	0.000477933	353		8.30872	37	-0.136758	0.00286685	1.03753	0.01716	198.194	5.61591	0.351638	0.212639	249.832	0.128789	2.73451	2.21162	0.0803264	10.1053	49.3508	47.2974	49.8205	6.36635	7.11427	0.508834	-0.00405375
JP1	2.0331	1	0.00243025	0.00891259	0.00448397	0.00302153	0.00804384	2.1012	0.000360471	0.000298176	0.167172	0.000241678	0.00135026	0.000705254	0.000233834	0.00321223	0.0233423	0.0320573	0.024116	0.02657	0.0045343	0.000467441	2.21671e-05	0.000518596	354		8.71794	37	-0.0829047	0.00387802	1.01968	0.0163997	168.055	5.61792	0.511587	0.294984	226.62	0.165407	2.01383	1.21102	0.104369	9.29947	40.6784	40.009	45.5619	5.26225	2.72599	0.486287	0.00981109
JP1	2.02168	1	0.00256554	0.0092857	0.00405372	0.00441396	0.00723915	2.15761	0.000223062	0.000289575	0.153919	0.000161354	0.00176455	0.00123319	0.000152855	0.00301146	0.0232088	0.0322125	0.0212594	0.0238567	0.00638741	0.000338966	2.40183e-05	0.000293886	355		8.66895	37	-0.0875197	0.00404037	0.921839	0.0239572	151.244	5.76876	0.316574	0.286476	208.653	0.110432	2.63172	2.11755	0.0682248	8.71823	40.4459	40.2026	40.165	4.72488	3.84007	0.352632	0.0106304
JP1	2.23802	1	0.00124594	0.00723625	0.00380577	0.00469965	0.00738127	2.22462	0.000355848	0.00032197	0.0440684	0.000294351	0.00165833	0.000995245	5.21681e-05	0.00249999	0.0210876	0.0305608	0.0207515	0.0244436	0.0029927	0.000237641	-9.45164e-06	0.000192715	356		9.59659	37	-0.0425036	0.00314862	0.865454	0.0255078	154.213	5.9479	0.505026	0.318524	59.7394	0.201456	2.47331	1.70897	0.0232845	7.23751	36.7492	38.1413	39.2053	4.84113	1.79919	0.247222	-0.00418327
JP1	2.34105	1	0.00246407	0.0113922	0.00393285	0.00431387	0.00779849	2.29221	0.000342235	0.000164539	0.0532527	0.000276967	0.00115763	0.000843668	0.000161673	0.00382301	0.0210311	0.030373	0.0211006	0.0212237	0.00200651	0.000181344	-1.00313e-05	0.000239968	357		10.0384	37	-0.0840583	0.00495694	0.894353	0.023414	162.929	6.12863	0.485707	0.162778	72.1896	0.189559	1.72654	1.44869	0.0721604	11.0677	36.6507	37.9069	39.8649	4.20342	1.2063	0.188655	-0.00443981
JP1	2.26847	1	0.00134986	0.00802343	0.00380322	0.00520433	0.00641087	2.33475	0.000340149	0.000304412	0.0612881	0.000310498	0.00178452	0.00112028	0.000125468	0.00232015	0.0216442	0.029481	0.0199482	0.0225049	0.00224082	0.000180239	2.5249e-05	6.24103e-05	358		9.72719	37	-0.0460486	0.00349113	0.864875	0.028247	133.939	6.24236	0.482746	0.301154	83.0824	0.212507	2.66151	1.92367	0.056001	6.71688	37.7193	36.7936	37.6877	4.45716	1.34716	0.187506	0.0111751
JP1	2.21846	1	0.00337334	0.00800277	0.00396912	0.00513522	0.00683619	2.23608	0.000229823	5.6726e-05	0.0225941	0.000269798	0.00174899	0.000994418	5.39341e-05	0.00400054	0.0230123	0.028271	0.0194819	0.0215038	0.00198909	0.000245686	-9.77159e-06	0.000268275	359		9.51273	37	-0.115077	0.00348214	0.902601	0.027872	142.825	5.97854	0.326169	0.0561189	30.6287	0.184652	2.60851	1.70755	0.0240728	11.5816	40.1034	35.2834	36.8068	4.25889	1.19583	0.255591	-0.00432488
JP1	2.1348	1	0.00244792	0.00532434	0.00450271	0.00488337	0.00566875	2.26733	0.000118484	0.000279955	0.0167219	0.000253162	0.00115531	0.000997883	0.000180167	0.00307336	0.0216909	0.0296472	0.0175017	0.0206641	0.000829981	0.000133369	2.32204e-05	0.000413681	360		9.15402	37	-0.0835073	0.00231671	1.02394	0.026505	118.434	6.06211	0.168154	0.276959	22.6682	0.173266	1.72307	1.7135	0.0804149	8.89745	37.8006	37.0011	33.0657	4.09258	0.498979	0.138746	0.0102773
JP1	2.07187	1	0.00281653	0.0033938	0.00399323	0.00348517	0.00559091	2.21592	0.000221565	8.79655e-05	0.0162802	0.000260104	0.00161959	0.00125819	0.000151829	0.0033573	0.0220188	0.0282565	0.0186818	0.019865	0.0022504	0.000236858	2.38571e-05	9.22475e-05	361		8.88415	37	-0.0960822	0.0014767	0.908084	0.0189161	116.808	5.92466	0.31445	0.0870241	22.0695	0.178017	2.41553	2.16048	0.0677669	9.71945	38.372	35.2654	35.2951	3.93431	1.35292	0.246408	0.0105591
JP1	2.09488	1	0.00495885	0.00122511	0.00510015	0.00360225	0.0066233	2.27505	0.000377439	5.81977e-05	0.0147357	0.000383037	0.00165271	0.00112646	0.000196987	0.00332488	0.0232188	0.0296437	0.0194197	0.0214944	0.000730401	0.000181233	-1.00251e-05	0.000275235	362		8.98283	37	-0.169164	0.000533067	1.1598	0.0195516	138.377	6.08276	0.535669	0.0575749	19.9757	0.262154	2.46492	1.93428	0.0879225	9.62559	40.4632	36.9966	36.6893	4.25702	0.439112	0.18854	-0.00443709
JP1	1.9979	1	0.0019709	0.00205075	0.00453929	0.00348179	0.00527184	2.12447	0.00016264	5.73797e-05	0.0266697	0.000307822	0.00183897	0.00142486	0.000264049	0.00324323	0.0250278	0.0295772	0.0224361	0.022975	0.00117404	4.10772e-06	-9.8842e-06	0.000376113	363		8.56696	37	-0.0672345	0.000892318	1.03226	0.0188978	110.142	5.68015	0.230822	0.0567656	36.1536	0.210676	2.74272	2.44669	0.117855	9.38921	43.6159	36.9136	42.3882	4.55027	0.705823	0.00427333	-0.00437472
JP1	1.85066	1	0.0034556	0.000252812	0.00438098	0.00270689	0.00516138	2.1944	5.63072e-05	0.000123726	0.0139264	0.000401267	0.00226402	0.000842486	8.70202e-05	0.00356189	0.0226059	0.0305046	0.018554	0.0229916	0.00107396	7.19134e-05	2.43457e-05	2.62184e-05	364		7.93561	37	-0.117883	0.000110003	0.996261	0.0146919	107.834	5.86711	0.0799123	0.122402	18.8787	0.274631	3.37666	1.44666	0.0388403	10.3117	39.3951	38.0711	35.0536	4.55354	0.645656	0.0748128	0.0107753
JP1	1.72928	1	0.0017416	0.00104908	0.00471862	0.00321358	0.00558217	2.1256	8.83166e-05	0.000154279	0.0451899	0.000525502	0.00151738	0.00125622	0.000184817	0.0034185	0.0247826	0.0293124	0.0191523	0.0218962	0.00111721	7.03601e-05	-9.40577e-06	0.00019178	365		7.41515	37	-0.0594124	0.000456475	1.07304	0.0174421	116.625	5.68315	0.125341	0.152628	61.2597	0.359658	2.26309	2.1571	0.0824907	9.89663	43.1885	36.5832	36.184	4.33661	0.67166	0.0731968	-0.00416297
JP1	1.71627	1	0.00311824	-0.000450263	0.00411554	0.00259153	0.00569662	2.24796	5.45925e-05	0.000119958	0.0117879	0.000389047	0.00170121	0.00140948	0.00015022	0.00345342	0.023304	0.0291793	0.0186488	0.0235442	0.00104125	0.000135573	-9.32068e-06	0.000124195	366		7.35935	37	-0.106375	-0.000195917	0.935898	0.0140658	119.016	6.0103	0.0774787	0.118675	15.9798	0.266268	2.53725	2.42027	0.0670488	9.99773	40.6117	36.417	35.2328	4.663	0.625994	0.141039	-0.00412531
JP1	1.85661	1	0.00399539	0.000931645	0.0047384	0.00409727	0.00452644	2.25577	5.81945e-05	5.76783e-05	0.0110548	0.000344522	0.00128699	0.00150248	0.000335618	0.00371637	0.0259323	0.0321609	0.0206882	0.0258708	0.00118015	0.000144518	-9.93564e-06	9.72919e-05	367		7.96115	37	-0.136297	0.000405375	1.07754	0.0222383	94.5683	6.0312	0.0825907	0.0570611	14.9859	0.235794	1.91947	2.57996	0.149799	10.759	45.1921	40.1382	39.0858	5.12379	0.709497	0.150345	-0.00439749
JP1	1.74188	1	0.00488054	-0.000953358	0.00505166	0.00260147	0.00577291	2.16264	9.13344e-05	5.64681e-05	0.0199085	0.000371654	0.00205029	0.00143659	0.000225494	0.00370712	0.0243203	0.0296244	0.0194277	0.0243302	0.000639972	0.000210208	2.46338e-05	0.000335777	368		7.46916	37	-0.166493	-0.000414822	1.14878	0.0141198	120.61	5.7822	0.129623	0.0558638	26.9881	0.254363	3.05788	2.46682	0.100646	10.7322	42.3828	36.9726	36.7044	4.81866	0.384747	0.218683	0.0109028
JP1	1.77736	1	0.00456235	0.0013938	0.00494112	0.00263186	0.00600472	2.12854	5.68876e-05	9.06922e-05	0.0135204	0.000302476	0.00149825	0.00126288	0.000225154	0.00308397	0.0239738	0.0318175	0.0226311	0.0248088	0.000879172	0.000209891	-9.71252e-06	0.000198035	369		7.6213	37	-0.155638	0.000606465	1.12364	0.0142847	125.453	5.69101	0.080736	0.0897217	18.3283	0.207017	2.23455	2.16854	0.100494	8.92815	41.7791	39.7096	42.7565	4.91346	0.528553	0.218354	-0.00429874
JP1	1.56783	1	0.00371831	-0.00167139	0.00515039	0.0024414	0.00483868	1.9209	0.0001755	1.99562e-05	0.00722381	0.000490579	0.0015096	0.00142088	0.000203553	0.00368792	0.0250333	0.028049	0.0197136	0.024572	0.000391597	9.67018e-05	-8.78071e-06	0.000117	370		6.72284	37	-0.126845	-0.000727252	1.17123	0.0132509	101.092	5.13585	0.249073	0.0197426	9.79263	0.335757	2.25148	2.43984	0.090853	10.6766	43.6254	35.0064	37.2445	4.86655	0.235425	0.100601	-0.00388632
JP1	1.64307	1	0.00260855	0.000441586	0.00550721	0.00271056	0.00498092	2.06815	0.000152654	0.000152172	0.00881311	0.000354465	0.00166052	0.00146846	0.000378923	0.00356844	0.0231955	0.0292738	0.0212227	0.0262573	0.000380972	3.8555e-06	-9.2773e-06	5.80735e-05	371		7.04547	37	-0.0889871	0.000192142	1.25237	0.0147118	104.063	5.52955	0.216649	0.150543	11.9471	0.242599	2.47656	2.52155	0.169127	10.3307	40.4226	36.5351	40.0957	5.20032	0.229038	0.00401094	-0.00410611
JP1	1.73194	1	0.00219138	-0.00101098	0.00523327	0.00260632	0.00625257	2.17539	0.000158264	0.000225717	0.00937519	0.00057135	0.00212926	0.00135255	0.000324897	0.00363164	0.0242522	0.0321566	0.0251367	0.0250444	0.00059883	3.79734e-05	-9.61826e-06	0.000230089	372		7.42654	37	-0.0747559	-0.000439893	1.19008	0.0141461	130.632	5.81629	0.224611	0.223301	12.7091	0.391037	3.17566	2.32252	0.145014	10.5137	42.2641	40.1329	47.4902	4.96012	0.360013	0.0395044	-0.00425702
JP1	1.91225	1	0.00423766	0.000151322	0.00554171	0.00330785	0.00598565	2.24924	0.000159307	0.000329805	0.0100529	0.000335715	0.00204069	0.00221647	0.000190239	0.00324517	0.0252695	0.0304811	0.0224904	0.0272646	0.000226576	0.000140824	5.87187e-05	0.000197405	373		8.19971	37	-0.144562	6.58428e-05	1.26022	0.0179537	125.055	6.01374	0.226092	0.326276	13.6278	0.229766	3.04358	3.80599	0.0849104	9.39484	44.0369	38.0417	42.4908	5.39983	0.136216	0.146502	0.0259887
JP1	1.74107	1	0.00400099	0.000323709	0.00479395	0.00344848	0.00513533	2.17802	0.000364914	9.05047e-05	0.0111954	0.000267612	0.00200873	0.0019108	0.00039588	0.00348845	0.0236497	0.0306869	0.0224812	0.0281865	0.00077464	0.000140981	5.8784e-05	0.000197625	374		7.46567	37	-0.136488	0.000140851	1.09017	0.018717	107.289	5.82331	0.517893	0.0895361	15.1765	0.183156	2.9959	3.2811	0.176695	10.0991	41.2142	38.2986	42.4733	5.58242	0.465708	0.146665	0.0260177
JP1	1.73065	1	0.00169716	-0.000325085	0.00538826	0.00302043	0.00784812	2.07929	0.000123163	5.53306e-05	0.035851	0.00029683	0.00190798	0.00171067	0.000321957	0.00302641	0.0244381	0.0308518	0.022411	0.0243121	0.000357731	0.000104967	2.41375e-05	9.33318e-05	375		7.42103	37	-0.0578962	-0.00014145	1.22532	0.0163937	163.966	5.55935	0.174796	0.0547385	48.5997	0.203153	2.84564	2.93745	0.143701	8.7615	42.5881	38.5045	42.3407	4.81508	0.215065	0.109199	0.0106832
JP1	1.59339	1	0.00181135	0.000111567	0.00549073	0.00270244	0.00555479	1.98806	8.68495e-05	8.6369e-05	0.0207319	0.000222709	0.00191694	0.00136605	0.000214421	0.00398284	0.0230277	0.0293173	0.0224694	0.0234955	0.00188282	3.84396e-06	2.34241e-05	0.000123247	376		6.83245	37	-0.0617916	4.85449e-05	1.24862	0.0146678	116.053	5.31542	0.123258	0.0854447	28.1043	0.152424	2.859	2.34569	0.0957039	11.5304	40.1303	36.5892	42.451	4.65335	1.13194	0.00399894	0.0103675
JP1	1.63696	1	0.00213688	-0.000967703	0.00494757	0.00278344	0.00568761	2.0997	0.000156758	5.53046e-05	0.00962285	0.000498607	0.00146959	0.00167621	0.000153541	0.00302498	0.0234143	0.030905	0.021692	0.0244356	0.00113158	3.76121e-05	2.41262e-05	5.96349e-05	377		7.01927	37	-0.0728966	-0.000421064	1.12511	0.0151074	118.828	5.61392	0.222474	0.0547127	13.0448	0.341251	2.19181	2.87828	0.0685311	8.75738	40.804	38.5708	40.9824	4.83954	0.680298	0.0391285	0.0106782
JP1	1.72083	1	0.00309404	-0.00153038	0.00540904	0.00256069	0.00644389	2.15566	5.53493e-05	-1.19044e-05	0.00901045	0.000127389	0.00252628	0.00106182	0.000219066	0.00259967	0.0241291	0.0295504	0.0205467	0.0227343	0.000488203	3.73087e-05	2.39315e-05	5.91538e-05	378		7.3789	37	-0.105549	-0.000665897	1.23005	0.0138984	134.629	5.76354	0.0785528	-0.011777	12.2146	0.0871864	3.76779	1.8233	0.097777	7.52609	42.0496	36.8802	38.8184	4.50259	0.293505	0.0388128	0.010592
JP1	1.68175	1	0.00211376	-0.00331383	0.00501512	0.002514	0.00576859	2.07253	0.000218204	0.000184949	0.00864918	0.000125066	0.00179165	0.0012391	0.000149525	0.00320804	0.0251678	0.0282551	0.0198436	0.0210072	0.000643164	0.000102174	-9.27757e-06	5.80752e-05	379		7.21131	37	-0.0721079	-0.0014419	1.14047	0.013645	120.52	5.54127	0.309679	0.18297	11.7249	0.0855966	2.67215	2.1277	0.0667387	9.28735	43.8597	35.2637	37.4901	4.16053	0.386666	0.106293	-0.00410623
JP1	1.75124	1	0.00516914	-0.00180006	0.00541544	0.00289162	0.00658329	2.19711	0.000235621	2.27685e-05	0.0283444	0.00013505	0.00175773	0.00126723	0.000303016	0.00441997	0.0263253	0.0313984	0.0211437	0.0223298	0.000446782	3.95521e-05	2.53706e-05	6.27109e-05	380		7.50929	37	-0.176338	-0.000783237	1.2315	0.0156945	137.541	5.87436	0.334398	0.0225248	38.4238	0.0924291	2.62155	2.176	0.135247	12.7959	45.8769	39.1866	39.9465	4.42248	0.268603	0.0411467	0.011229
JP1	1.82504	1	0.00385852	-0.00217119	0.00521109	0.00237045	0.00507171	2.17601	9.17153e-05	0.000194721	0.00696517	0.000166179	0.00192082	0.00151159	0.000122921	0.00313601	0.0245946	0.0278444	0.0186099	0.0201479	0.000435616	7.30678e-05	-9.76775e-06	2.66393e-05	381		7.82574	37	-0.131628	-0.000944724	1.18503	0.0128658	105.96	5.81795	0.130164	0.192637	9.44201	0.113734	2.86479	2.59561	0.0548643	9.07881	42.8609	34.7511	35.1594	3.99036	0.26189	0.0760137	-0.00432318
JP1	1.64824	1	0.00486743	-0.00115916	0.00513269	0.00315638	0.00673322	2.03639	-1.13936e-05	-1.18836e-05	0.00812766	0.000193814	0.0018884	0.00155982	8.53907e-05	0.00296169	0.0245212	0.0276934	0.018741	0.0207596	0.00148705	3.72436e-05	-9.4334e-06	0.000225667	382		7.06765	37	-0.166046	-0.000504371	1.1672	0.0171316	140.673	5.44465	-0.01617	-0.0117565	11.0179	0.132648	2.81643	2.67842	0.038113	8.57414	42.7329	34.5626	35.407	4.11149	0.894003	0.0387451	-0.0041752
JP1	1.66608	1	0.00426706	-0.00258131	0.0056933	0.00247227	0.0058247	1.95605	2.17771e-05	8.74734e-05	0.00810424	9.31914e-05	0.00167672	0.00118497	0.000217163	0.002908	0.0246495	0.0256424	0.0176156	0.0187598	0.00210544	-2.91984e-05	2.37237e-05	0.000455738	383		7.14415	37	-0.145565	-0.00112317	1.29469	0.0134185	121.692	5.22983	0.0309065	0.0865373	10.9861	0.063781	2.50072	2.03475	0.0969277	8.41872	42.9565	32.0029	33.2809	3.71542	1.26578	-0.0303755	0.0105
JP1	1.7645	1	0.00539276	-0.00158343	0.004836	0.00230373	0.00760118	2.24407	5.7268e-05	2.22215e-05	0.00755994	0.000235421	0.00143919	0.00102955	0.000192121	0.0030697	0.0239611	0.0269022	0.0191475	0.0201334	0.000539665	4.06336e-06	-9.77746e-06	-7.87276e-06	384		7.56617	37	-0.183967	-0.000688979	1.09973	0.0125037	158.807	5.9999	0.0812758	0.0219837	10.2483	0.161124	2.14647	1.76788	0.0857505	8.88685	41.7569	33.5752	36.1751	3.98748	0.324443	0.00422718	-0.00432748
JP1	1.79541	1	0.00721431	-0.000615148	0.00511079	0.00287526	0.00719799	2.17888	0.00016193	5.71291e-05	0.00799149	0.000271715	0.00148331	0.000897196	0.000158607	0.00315954	0.0238381	0.0261358	0.0195508	0.0205776	0.000682227	-3.06734e-05	-9.84104e-06	0.000165892	385		7.69871	37	-0.246106	-0.000267661	1.16222	0.0156058	150.384	5.82563	0.229814	0.0565177	10.8333	0.185964	2.21227	1.54061	0.070792	9.14693	41.5425	32.6186	36.937	4.07545	0.41015	-0.03191	-0.00435562
JP1	1.82097	1	0.00581178	-0.00262186	0.00552576	0.00236713	0.00895584	2.20439	9.29398e-05	2.24958e-05	0.0246042	0.000203362	0.00149192	0.000972332	0.000264422	0.0030027	0.0227495	0.027164	0.0182626	0.0190869	0.000756116	7.40433e-05	-9.89815e-06	6.19598e-05	386		7.80828	37	-0.198261	-0.00114081	1.25659	0.0128478	187.109	5.89383	0.131902	0.022255	33.3536	0.139183	2.22511	1.66963	0.118021	8.69288	39.6455	33.9019	34.5031	3.78021	0.454572	0.0770285	-0.0043809
JP1	1.7209	1	0.0053317	-0.00261178	0.00457115	0.00177647	0.0063246	2.14242	0.00012572	5.64791e-05	0.0071785	0.000302991	0.00181011	0.00123066	0.000156802	0.00267647	0.0219131	0.0226683	0.0178131	0.0189674	0.000433891	-3.03243e-05	-9.72906e-06	0.000164004	387		7.37919	37	-0.181884	-0.00113643	1.03951	0.00964195	132.136	5.72813	0.178424	0.0558746	9.7312	0.207369	2.69967	2.11322	0.0699865	7.74842	38.1878	28.2911	33.654	3.75654	0.260852	-0.0315469	-0.00430606
JP1	1.7253	1	0.00303239	-0.000356333	0.00444797	0.00249842	0.00792925	1.99217	2.20074e-05	5.49571e-05	0.0119729	0.000127619	0.00136004	0.00146503	0.000152577	0.00260434	0.0202836	0.0249074	0.0177351	0.0211011	0.00149233	-2.95072e-05	5.74161e-05	0.000126143	388		7.39807	37	-0.103446	-0.000155046	1.01149	0.0135604	165.661	5.32641	0.0312334	0.054369	16.2305	0.0873433	2.02841	2.51566	0.0681006	7.53963	35.3481	31.0855	33.5065	4.17914	0.897177	-0.0306968	0.0254122
JP1	1.73513	1	0.0043328	0.000790456	0.00467116	0.00224121	0.00833741	2.01633	0.000156518	5.52197e-05	0.00678289	0.000128228	0.00143374	0.00123682	0.000254109	0.00248238	0.0197068	0.0230721	0.0179209	0.0194863	0.000861032	0.000272763	-9.51212e-06	0.000294752	389		7.44021	37	-0.147807	0.000343941	1.06225	0.0121644	174.189	5.39101	0.222133	0.0546287	9.19491	0.0877606	2.13833	2.12379	0.113418	7.18654	34.3429	28.795	33.8577	3.85931	0.517647	0.28376	-0.00421004
JP1	1.75427	1	0.00468497	0.00266724	0.00442011	0.00210109	0.00834951	2.10306	8.76744e-05	0.000153157	0.00943159	9.28888e-05	0.00130845	0.00108217	0.000216458	0.00266767	0.0190143	0.0223838	0.0163027	0.0200858	0.000680295	0.000465657	-9.33739e-06	2.54656e-05	390		7.5223	37	-0.159821	0.00116056	1.00516	0.0114039	174.442	5.62289	0.124429	0.151518	12.7855	0.0635739	1.95147	1.85823	0.0966129	7.72296	33.1361	27.9359	30.8005	3.97806	0.408989	0.484431	-0.0041327
JP1	1.98129	1	0.00628101	0.00729262	0.00516802	0.00246987	0.00861621	2.23201	0.000160458	0.000228846	0.036438	0.000131456	0.00150428	0.000923488	1.93765e-05	0.00264822	0.0184079	0.0220991	0.01675	0.019632	0.000951603	0.000417419	-9.75159e-06	0.000198831	391		8.49577	37	-0.214268	0.00317315	1.17524	0.0134055	180.014	5.96767	0.227725	0.226397	49.3955	0.08997	2.24354	1.58576	0.00864845	7.66664	32.0793	27.5806	31.6454	3.88818	0.572098	0.434248	-0.00431603
JP1	2.09172	1	0.00482903	0.0118979	0.00522362	0.00288732	0.00841074	2.28311	0.00027396	0.00041653	0.00553903	0.000100746	0.00159799	0.00128102	5.58968e-05	0.00196319	0.0196188	0.0216595	0.0160332	0.0207105	0.000845159	0.00046927	-1.01272e-05	0.000206489	392		8.96927	37	-0.164736	0.00517696	1.18788	0.0156712	175.721	6.1043	0.388809	0.412072	7.50873	0.0689513	2.38331	2.19969	0.0249488	5.68347	34.1895	27.032	30.2913	4.10177	0.508104	0.488189	-0.00448227
JP1	2.14787	1	0.00645824	0.0169852	0.00427393	0.00321323	0.00949982	2.26098	0.000268285	0.000232737	0.00577498	9.8659e-05	0.000759133	0.00121946	8.9772e-05	0.00234292	0.0185808	0.0216673	0.0167188	0.0203516	0.000582423	0.000669748	-9.91742e-06	9.71134e-05	393		9.21003	37	-0.220314	0.00739055	0.971917	0.0174401	198.474	6.04512	0.380756	0.230247	7.82858	0.0675231	1.1322	2.09397	0.0400685	6.7828	32.3806	27.0418	31.5866	4.03069	0.350149	0.69675	-0.00438942
JP1	2.02453	1	0.00333557	0.0163275	0.0041552	0.00268482	0.00961542	2.19911	0.000183665	0.000248109	0.0312743	9.14148e-05	0.00148245	0.000967613	0.000245483	0.00223581	0.0174764	0.0224519	0.0182231	0.0221721	0.000572118	0.000263504	8.81926e-05	8.99827e-05	394		8.68115	37	-0.113788	0.00710438	0.944917	0.0145721	200.89	5.8797	0.260661	0.245454	42.3956	0.0625651	2.21098	1.66152	0.109568	6.47271	30.4561	28.0209	34.4286	4.39125	0.343954	0.274127	0.0390338
JP1	2.00432	1	0.00264308	0.0136816	0.0042301	0.00294156	0.0101729	2.05829	0.000218316	0.000185044	0.00478184	0.00015792	0.00103842	0.00127252	0.000149602	0.00248799	0.0182123	0.0263948	0.0208726	0.0244324	0.000446758	0.000397332	2.35072e-05	2.53155e-05	395		8.5945	37	-0.0901652	0.0059531	0.961949	0.0159656	212.537	5.50319	0.309838	0.183064	6.48228	0.108082	1.54874	2.1851	0.066773	7.20279	31.7384	32.9418	39.4342	4.8389	0.268588	0.413351	0.0104042
JP1	2.03491	1	0.00241606	0.0128774	0.0043359	0.0032097	0.0105195	2.25382	0.000185845	0.000283899	0.00626909	0.000191037	0.000810278	0.00120902	5.13216e-05	0.00209812	0.0220954	0.0290434	0.0230158	0.0267771	0.000414679	0.000168093	-9.29827e-06	0.00216067	396		8.72569	37	-0.0824205	0.00560316	0.986009	0.017421	219.778	6.02599	0.263754	0.280861	8.49841	0.130748	1.20848	2.07605	0.0229067	6.07408	38.5055	36.2475	43.4833	5.30329	0.249302	0.17487	-0.00411539
JP1	1.99717	1	0.0039679	0.010308	0.00400498	0.00300281	0.0122266	2.17235	0.000154181	0.000451591	0.00790731	9.32145e-05	0.00144543	0.00164866	0.000151017	0.00357104	0.0237592	0.0329548	0.0272434	0.0332505	0.000484083	0.000136293	-9.37012e-06	2.55549e-05	397		8.56385	37	-0.13536	0.00448521	0.910755	0.016298	255.444	5.80815	0.218817	0.446758	10.7192	0.0637968	2.15578	2.83097	0.0674045	10.3382	41.4051	41.1291	51.4704	6.58535	0.291027	0.141788	-0.00414719
JP1	2.01786	1	0.00232513	0.00578248	0.00488649	0.00348528	0.0107988	2.16636	0.000191978	0.000191479	0.00786813	0.000197342	0.00127811	0.00141857	5.30154e-05	0.00349096	0.0256143	0.0369152	0.0315351	0.0363282	0.000971242	0.000241501	2.43247e-05	0.000297635	398		8.65255	37	-0.0793185	0.00251606	1.11122	0.0189167	225.613	5.79215	0.272459	0.18943	10.6661	0.135063	1.90622	2.43587	0.0236627	10.1064	44.6379	46.0718	59.5787	7.19491	0.583904	0.251237	0.0107661
JP1	1.98899	1	0.00367308	0.00421562	0.00456651	0.00345902	0.0119752	2.24399	5.86918e-05	0.000128966	0.00817302	9.96849e-05	0.000944014	0.0017631	0.000126103	0.00289824	0.0309471	0.0389382	0.0342136	0.040666	0.000588479	3.95616e-05	9.61712e-05	9.81233e-05	399		8.52877	37	-0.125302	0.00183429	1.03845	0.0187742	250.191	5.9997	0.0832965	0.127586	11.0794	0.0682252	1.40794	3.02748	0.0562842	8.39047	53.9313	48.5966	64.6392	8.05402	0.35379	0.0411566	0.0425651
JP1	1.80784	1	0.00105376	0.00343594	0.00424495	0.00339334	0.0128166	2.09445	0.000258007	0.000257511	0.010072	0.000195951	0.00157232	0.00161071	0.000120023	0.0037022	0.0296579	0.0390572	0.0333081	0.0401913	0.00120023	-2.97271e-05	-9.53745e-06	5.9702e-05	400		7.75201	37	-0.0359476	0.00149503	0.965326	0.0184177	267.769	5.59987	0.366168	0.254755	13.6536	0.134111	2.34502	2.76582	0.0535708	10.7179	51.6847	48.7451	62.9283	7.95999	0.721572	-0.0309256	-0.00422125
JP1	1.83474	1	0.00232281	0.0016054	0.00457586	0.00260466	0.0141571	2.13149	2.26402e-05	0.00019415	0.00783991	0.000165691	0.00126153	0.00167917	8.81578e-05	0.00343644	0.0286973	0.0421635	0.0313192	0.0411102	0.000537548	7.28535e-05	-9.7391e-06	0.000164173	401		7.86735	37	-0.0792394	0.000698539	1.04058	0.0141371	295.777	5.69891	0.0321315	0.192072	10.6278	0.1134	1.8815	2.88337	0.0393481	9.94856	50.0106	52.6219	59.1708	8.14198	0.32317	0.0757907	-0.0043105
JP1	1.74893	1	0.0065874	-0.000261754	0.00510221	0.00331138	0.0128527	2.08075	0.000262188	-1.22094e-05	0.0085559	6.21799e-05	0.00111848	0.00126021	0.000224678	0.00331711	0.0296921	0.0390711	0.0327139	0.0419751	0.000603422	4.02785e-06	-9.69201e-06	9.49062e-05	402		7.4994	37	-0.22472	-0.000113893	1.16027	0.0179729	268.525	5.56325	0.372102	-0.0120788	11.5984	0.0425565	1.66815	2.16396	0.100282	9.60311	51.7443	48.7625	61.8058	8.31329	0.362773	0.00419024	-0.00428966
JP1	1.67641	1	0.0042479	8.08096e-05	0.00518832	0.00286847	0.0138389	2.08283	0.000122426	8.84664e-05	0.0059188	0.000228118	0.00116028	0.00123189	0.000186161	0.00307522	0.0254661	0.0385961	0.0312396	0.0404948	0.000522924	3.93731e-06	-9.47415e-06	0.00012624	403		7.18844	37	-0.144911	3.51616e-05	1.17986	0.0155689	289.129	5.56882	0.173749	0.0875196	8.02355	0.156126	1.73048	2.11532	0.0830904	8.90281	44.3796	48.1697	59.0204	8.0201	0.314378	0.00409605	-0.00419323
JP1	1.76303	1	0.00308246	-0.00180341	0.00525035	0.00207543	0.0139223	2.14661	0.000231463	0.000335245	0.0158234	0.000202195	0.00127477	0.00127963	0.000158612	0.00281165	0.0258256	0.0385558	0.0332527	0.0440155	0.00193376	4.08991e-06	5.96871e-05	-7.92419e-06	404		7.55986	37	-0.105154	-0.000784694	1.19396	0.0112646	290.871	5.73934	0.328497	0.331657	21.4503	0.138384	1.90125	2.1973	0.0707942	8.13977	45.0061	48.1193	62.8237	8.7174	1.16256	0.0042548	0.0264174
JP1	1.755	1	0.00595022	0.0363712	0.00552565	0.00269998	0.0140884	2.16043	0.000266075	0.000161331	0.00458014	0.00013259	0.00120455	0.00120941	0.000158521	0.00281004	0.0257413	0.0403484	0.0341054	0.0463936	0.000195437	3.88319e-05	2.49086e-05	6.15689e-05	405		7.52543	37	-0.202984	0.0158257	1.25656	0.0146544	294.341	5.77628	0.377619	0.159605	6.20885	0.090746	1.79652	2.07672	0.0707536	8.13511	44.8593	50.3566	64.4347	9.18838	0.117495	0.0403974	0.0110245
JP1	1.76415	1	0.00419351	4.75369e-05	0.00456918	0.00239277	0.0143003	2.12201	0.000191492	0.000123306	0.00788204	0.000162998	0.00110565	0.000941158	0.000323632	0.0028049	0.0243276	0.0396763	0.0343766	0.0461413	0.000325747	3.98163e-06	-9.5808e-06	-7.71441e-06	406		7.56467	37	-0.143056	2.06841e-05	1.03906	0.012987	298.769	5.67356	0.271768	0.121987	10.6849	0.111557	1.64901	1.6161	0.144449	8.12024	42.3956	49.5178	64.9471	9.1384	0.195837	0.00414216	-0.00424044
JP1	1.73881	1	0.00344839	-0.00131505	0.00406651	0.00229424	0.0147268	2.04779	0.000225631	5.56915e-05	0.00558629	6.15472e-05	0.00131043	0.0012135	0.000154615	0.00318169	0.0248693	0.045585	0.0390496	0.0479007	0.000292287	3.98686e-06	-9.59339e-06	0.000127829	407		7.456	37	-0.117637	-0.000572201	0.924749	0.0124522	307.678	5.47512	0.32022	0.0550955	7.5728	0.0421234	1.95443	2.08375	0.0690105	9.21107	43.3395	56.8922	73.7756	9.48686	0.175721	0.0041476	-0.00424601
JP1	1.61789	1	0.00469143	-0.00124174	0.00475893	0.00302745	0.0161553	2.0877	0.000157197	0.00039293	0.00475274	-6.2035e-06	0.0014737	0.00127594	0.000153971	0.00306719	0.0272025	0.0487873	0.0411917	0.0538605	0.000291068	3.77173e-05	-9.5534e-06	-7.69234e-06	408		6.93749	37	-0.160042	-0.000540301	1.08221	0.0164318	337.524	5.58184	0.223097	0.388725	6.44283	-0.00424573	2.19794	2.19096	0.0687229	8.87958	47.4056	60.8887	77.8227	10.6672	0.174988	0.0392379	-0.00422831
JP1	1.74684	1	0.00277798	-0.000376609	0.00639973	0.00278197	0.016317	2.53051	0.000306015	-1.26044e-05	0.00472994	6.41917e-05	0.0015788	0.00133633	5.52257e-05	0.00310599	0.0312911	0.0509188	0.0471902	0.0640334	0.000269501	3.95026e-05	-1.00056e-05	2.7288e-05	409		7.49046	37	-0.0947671	-0.000163869	1.45534	0.0150994	340.903	6.76575	0.434303	-0.0124696	6.41192	0.0439334	2.3547	2.29466	0.0246492	8.99189	54.5308	63.5489	89.1555	12.682	0.162022	0.0410952	-0.00442845
JP1	1.77147	1	0.0045611	-0.000666509	0.00463489	0.00302	0.0170308	2.29509	0.000273018	0.000236843	0.00601946	0.00013605	0.0015925	0.00141922	0.000233959	0.00381065	0.0335657	0.0572767	0.0491759	0.0672005	0.000378792	-3.14567e-05	-1.00924e-05	-8.12632e-06	410		7.59603	37	-0.155596	-0.00029001	1.054	0.0163914	355.814	6.13634	0.387473	0.234308	8.16	0.0931141	2.37512	2.437	0.104425	11.0319	58.4948	71.4838	92.9072	13.3093	0.227727	-0.032725	-0.00446686
JP1	1.73941	1	0.00347107	-0.000706626	0.00484438	0.00306012	0.0177671	2.21247	0.000158893	0.000260725	0.00466723	0.00030073	0.00142138	0.0015967	0.000121521	0.00306617	0.0323554	0.0595054	0.0510992	0.0724813	0.00032832	4.01308e-06	-9.65647e-06	9.45581e-05	411		7.45859	37	-0.118411	-0.000307465	1.10164	0.0166091	371.198	5.91541	0.225504	0.257934	6.32692	0.205822	2.11991	2.74176	0.0542393	8.87663	56.3856	74.2654	96.5409	14.3551	0.197384	0.00417487	-0.00427393
JP1	1.75933	1	0.00489806	-0.00158094	0.00475908	0.00343877	0.0184462	2.17659	0.000195115	0.000229092	0.00582246	0.000131598	0.00154038	0.00164865	0.000260787	0.00337558	0.036586	0.0671358	0.0601237	0.084149	0.000745722	4.05697e-06	-9.76208e-06	0.000164561	412		7.54398	37	-0.16709	-0.000687896	1.08224	0.0186643	385.387	5.81948	0.276911	0.22664	7.89296	0.0900668	2.29739	2.83096	0.116399	9.77237	63.7583	83.7885	113.591	16.6659	0.448323	0.00422053	-0.00432067
JP1	1.77741	1	0.00387331	-0.000155995	0.00485708	0.00289063	0.0199702	2.10562	0.000494353	0.000156601	0.00569438	0.000196154	0.00167512	0.00161238	0.000221325	0.00397617	0.0387615	0.0735099	0.0610418	0.0837885	0.000526963	3.76934e-05	-9.54733e-06	9.34895e-05	413		7.62153	37	-0.132132	-6.7876e-05	1.10453	0.0156892	417.227	5.62973	0.701596	0.154925	7.71932	0.13425	2.49835	2.76868	0.0987852	11.5111	67.5495	91.7437	115.325	16.5946	0.316807	0.039213	-0.00422563
JP1	1.77666	1	0.00237716	0.00258937	0.00431393	0.00406901	0.0252373	2.16968	0.000325483	0.000358688	0.0197962	0.000128607	0.00167388	0.00171229	0.000288561	0.00404062	0.0422194	0.0759701	0.0623876	0.0889752	0.00120058	0.000206168	-9.54024e-06	9.342e-05	414		7.61831	37	-0.0810934	0.00112668	0.981013	0.022085	527.269	5.80101	0.461932	0.35485	26.8358	0.08802	2.49649	2.94023	0.128795	11.6977	73.5755	94.814	117.868	17.6218	0.721783	0.21448	-0.00422249
JP1	1.8274	1	0.00284135	0.00457249	0.0039277	0.00472543	0.022205	2.15956	0.000391371	0.000323736	0.016659	0.000329537	0.00176814	0.00153784	0.000253879	0.00368901	0.0403369	0.0795716	0.0657652	0.0959552	0.000793109	0.000138233	2.40673e-05	0.000160202	415		7.83586	37	-0.0969286	0.00198957	0.893181	0.0256477	463.916	5.77397	0.555441	0.320271	22.583	0.225538	2.63708	2.64068	0.113315	10.6798	70.2949	99.3089	124.249	19.0042	0.476812	0.143806	0.0106521
JP1	2.01655	1	0.00289822	0.012669	0.00422557	0.00638502	0.0278776	2.39225	0.000307447	0.000342434	0.0188306	0.000171021	0.00179925	0.00194625	0.000410582	0.00436407	0.0458061	0.0907617	0.0757186	0.103747	0.000661369	3.96874e-05	-1.00524e-05	9.84352e-05	416		8.64694	37	-0.0988687	0.00551249	0.96092	0.0346553	582.431	6.3961	0.436334	0.338769	25.5269	0.117048	2.68347	3.34197	0.183258	12.6341	79.8261	113.275	143.054	20.5473	0.397611	0.0412874	-0.00444917
JP1	2.09368	1	0.000871043	0.0102141	0.00438432	0.0055621	0.0288278	2.50947	0.000634593	0.000274686	0.00718268	0.000209021	0.00174906	0.0013947	0.000128028	0.00427292	0.0497534	0.0934525	0.077211	0.112551	0.000381839	0.000147979	-1.01736e-05	6.36839e-05	417		8.97766	37	-0.0297144	0.00444431	0.997021	0.0301889	602.283	6.70949	0.900627	0.271747	9.73687	0.143056	2.60862	2.3949	0.0571438	12.3702	86.7049	116.633	145.873	22.2911	0.229559	0.153945	-0.0045028
JP1	2.13913	1	-0.000743337	0.00751033	0.00469632	0.00500537	0.0323018	2.28505	0.00048225	0.000340495	0.00822319	0.000134744	0.00178906	0.00144091	0.000196405	0.00419812	0.0462208	0.0951685	0.0794553	0.119534	0.000445773	0.000216006	-9.99548e-06	2.72604e-05	418		9.17257	37	0.0253579	0.00326787	1.06797	0.0271672	674.863	6.10947	0.684418	0.336851	11.1474	0.0922202	2.66828	2.47423	0.0876626	12.1536	80.5488	118.774	150.113	23.674	0.267996	0.224715	-0.00442398
JP1	2.02551	1	-0.00130342	0.0105323	0.00409364	0.00505126	0.0322905	2.17771	0.000487855	0.000786907	0.0181164	0.000193576	0.00195265	0.00179088	0.000218415	0.00409032	0.049825	0.0991253	0.0839288	0.126881	0.000453472	0.000303457	-9.42184e-06	2.56959e-05	419		8.68537	37	0.0444644	0.00458281	0.930919	0.0274163	674.626	5.8225	0.692374	0.778485	24.5586	0.132485	2.91226	3.07519	0.0974867	11.8416	86.8297	123.713	158.565	25.1292	0.272624	0.315691	-0.00417008
JP1	2.08506	1	-0.00108995	0.0101939	0.00431051	0.0056272	0.0356988	2.18811	0.000429637	0.000497021	0.0111663	0.000163469	0.00185556	0.00182636	8.69756e-05	0.00417135	0.0532698	0.109227	0.0897042	0.135618	0.000394572	0.000309468	-9.60849e-06	2.6205e-05	420		8.94074	37	0.0371822	0.00443553	0.980235	0.0305422	745.835	5.85028	0.609749	0.491702	15.1371	0.11188	2.76746	3.13611	0.0388204	12.0762	92.8329	136.32	169.477	26.8595	0.237214	0.321945	-0.0042527
JP1	2.11851	1	-0.000539043	0.011399	0.0034821	0.00681573	0.0379823	2.23289	0.000634036	0.000274445	0.0118126	0.000208837	0.00199887	0.00200389	0.000127916	0.00473595	0.0555585	0.11882	0.10237	0.14723	0.000489223	0.000291474	9.75542e-05	-8.18452e-06	421		9.08413	37	0.0183887	0.00495989	0.79185	0.0369931	793.543	5.97002	0.899836	0.271508	16.0132	0.14293	2.9812	3.44095	0.0570936	13.7107	96.8214	148.293	193.406	29.1594	0.294118	0.303226	0.0431772
JP1	2.01627	1	-0.000847664	0.0105093	0.004192	0.00746297	0.0360578	2.3023	0.000622052	0.000480624	0.0101084	0.00020489	0.00182018	0.00189556	0.000301636	0.00521043	0.0612784	0.121141	0.101539	0.152011	0.000550431	0.000250738	-9.97252e-06	9.7653e-05	422		8.64575	37	0.0289169	0.00457276	0.953284	0.040506	753.336	6.15559	0.882828	0.47548	13.7029	0.140228	2.71469	3.25493	0.134631	15.0843	106.789	151.19	191.835	30.1062	0.330916	0.260846	-0.00441381
JP1	2.07777	1	-0.00321054	0.00795972	0.00452218	0.00810671	0.0333402	2.27774	0.000705549	0.000633239	0.0113047	0.000280531	0.00199802	0.00207482	0.000163753	0.00566783	0.061168	0.131861	0.108278	0.164103	0.00102738	0.000147787	6.16217e-05	6.3601e-05	423		8.90947	37	0.109523	0.00346341	1.02837	0.044	696.558	6.08992	1.00133	0.626462	15.3248	0.191998	2.97993	3.56275	0.0730889	16.4085	106.597	164.568	204.567	32.501	0.617655	0.153745	0.0272736
JP1	1.95002	1	-0.000314474	0.0096084	0.00469678	0.00735497	0.0359805	2.21961	0.000724038	0.000408085	0.0124077	0.000168801	0.00156559	0.00265735	0.000194958	0.005675	0.0608259	0.132533	0.115667	0.16064	0.000442489	0.000179367	-9.92186e-06	9.7157e-05	424		8.36166	37	0.0107279	0.00418078	1.06808	0.0399198	751.721	5.93452	1.02757	0.403718	16.82	0.115529	2.33499	4.56303	0.087017	16.4292	106.001	165.407	218.528	31.8152	0.266022	0.186598	-0.00439139
JP1	1.83862	1	-0.000885441	0.00599057	0.00465109	0.00759988	0.031774	2.17126	0.000735243	0.000361319	0.012222	0.000231394	0.00168615	0.00267572	0.000154886	0.00597234	0.0572413	0.12214	0.100492	0.15871	0.000598329	0.000173732	2.43375e-05	-7.73808e-06	425		7.884	37	0.0302056	0.0026066	1.05769	0.0412491	663.836	5.80525	1.04347	0.357452	16.5682	0.158368	2.5148	4.59458	0.0691315	17.29	99.754	152.437	189.859	31.433	0.359711	0.180737	0.0107717
JP1	1.72394	1	-0.00230094	0.00318445	0.00494578	0.00586747	0.0293253	2.02874	0.000519645	0.000452783	0.0127791	0.000126648	0.00168156	0.00284807	0.000350538	0.00563906	0.0547898	0.117856	0.0996504	0.14953	0.000452173	0.000269401	2.37922e-05	0.000125183	426		7.39222	37	0.0784934	0.00138561	1.1247	0.0318463	612.677	5.4242	0.73749	0.447938	17.3234	0.0866787	2.50794	4.89053	0.156458	16.3252	95.4818	147.09	188.268	29.6148	0.271844	0.280262	0.0105304
JP1	1.72324	1	-0.00317478	0.00160243	0.00410649	0.00638134	0.0286845	2.21622	0.000689978	0.00040867	0.0125663	0.000204141	0.00160294	0.00245021	0.000160139	0.0051563	0.0504975	0.113555	0.0972304	0.149793	0.000583519	3.92282e-05	2.51628e-05	0.000167494	427		7.38922	37	0.108303	0.000697243	0.933839	0.0346354	599.29	5.92544	0.979229	0.404296	17.0349	0.139716	2.39069	4.20735	0.0714758	14.9276	88.0017	141.722	183.696	29.6668	0.350808	0.0408098	0.011137
JP1	1.74032	1	-0.000393102	0.00181418	0.00350696	0.00726036	0.0270208	2.17957	0.000524664	0.000595725	0.0138902	0.000208181	0.0019568	0.00292858	0.000306482	0.00586719	0.0519646	0.105699	0.0951045	0.1485	0.000487687	4.211e-06	-1.01327e-05	2.76347e-05	428		7.46247	37	0.0134101	0.000789381	0.797503	0.0394064	564.531	5.82745	0.744613	0.58935	18.8296	0.142481	2.91845	5.02878	0.136794	16.9856	90.5585	131.918	179.679	29.4108	0.293194	0.00438077	-0.00448472
JP1	1.7693	1	-0.0045747	-0.00200298	0.00369013	0.00848881	0.0256107	2.22802	0.000489429	0.000130558	0.0135473	0.00013675	0.0020307	0.00329027	0.0003785	0.00601722	0.0460088	0.101872	0.0907262	0.13957	0.00141994	4.00502e-05	9.73588e-05	0.000135169	429		7.58674	37	0.15606	-0.000871529	0.839158	0.0460739	535.071	5.957	0.694607	0.129161	18.3648	0.0935931	3.02867	5.64984	0.168939	17.42	80.1792	127.141	171.407	27.6422	0.853656	0.0416649	0.0430908
JP1	1.64864	1	-0.00161076	-0.000126044	0.00498603	0.00818899	0.0240757	2.14245	0.000545889	0.000161882	0.0137386	0.00020277	0.00190593	0.00327081	0.000159063	0.00536569	0.0438158	0.0901999	0.0818634	0.126061	0.000649324	0.000108691	-9.86932e-06	0.000131505	430		7.06933	37	0.0549489	-5.48439e-05	1.13385	0.0444466	502.999	5.72821	0.774735	0.16015	18.6241	0.138777	2.84259	5.61643	0.0709955	15.5338	76.3576	112.574	154.663	24.9668	0.390369	0.113073	-0.00436814
JP1	1.66092	1	-0.00235074	-0.00240531	0.00487968	0.00758199	0.0208287	2.05184	0.000356177	0.000188593	0.0130688	6.06938e-05	0.00155961	0.00360314	8.56348e-05	0.00500968	0.040053	0.0846742	0.0770554	0.120131	0.000589001	7.07685e-05	2.39581e-05	0.000159475	431		7.12201	37	0.0801922	-0.00104659	1.10967	0.041152	435.162	5.48595	0.505493	0.186575	17.7161	0.0415394	2.32607	6.18708	0.038222	14.5031	69.8002	105.677	145.579	23.7923	0.354103	0.0736217	0.0106038
JP1	1.61663	1	-0.00268791	0.00110318	0.00446924	0.00751162	0.0229719	2.08604	0.000394695	0.00029263	0.0144945	0.000196912	0.00161388	0.00256692	1.9044e-05	0.00632895	0.0359194	0.0776176	0.0699058	0.1108	0.000698279	3.7839e-05	9.19836e-05	0.000127707	432		6.93209	37	0.0916943	0.000480013	1.01633	0.0407701	479.938	5.57738	0.560159	0.289498	19.6489	0.134768	2.40701	4.40775	0.00850002	18.3224	62.5966	96.8702	132.072	21.9442	0.419801	0.0393645	0.0407117
JP1	1.70276	1	-0.00291149	-0.00165497	0.00434529	0.00720132	0.0232611	2.2112	0.000447188	0.000128714	0.0144879	0.000205475	0.00196669	0.00359708	0.00026717	0.00536664	0.0369498	0.0777867	0.0698843	0.109647	0.000940615	4.15627e-06	-1.0001e-05	9.79321e-05	433		7.30141	37	0.0993215	-0.000720105	0.988144	0.0390859	485.982	5.91203	0.634658	0.127337	19.6399	0.140629	2.93321	6.17668	0.119248	15.5365	64.3922	97.0812	132.031	21.7159	0.565492	0.00432383	-0.00442643
JP1	1.70116	1	-0.00241928	-0.00262242	0.00481564	0.00815308	0.0197635	2.32637	0.00034707	0.000238734	0.0162847	0.000244944	0.00185676	0.00340737	0.000235828	0.00499173	0.0367912	0.0709389	0.0689501	0.105425	0.000884915	4.22772e-06	2.57627e-05	9.96157e-05	434		7.29457	37	0.0825303	-0.00114106	1.09511	0.0442517	412.907	6.21997	0.492568	0.236179	22.0757	0.167642	2.76925	5.85093	0.105258	14.4512	64.1159	88.5349	130.266	20.8796	0.532005	0.00439817	0.0114025
JP1	1.64391	1	-0.000863146	-0.00130114	0.00464777	0.00853456	0.019348	2.24887	-1.17707e-05	5.65751e-05	0.0138421	0.000131376	0.00181319	0.00322981	1.93646e-05	0.00615976	0.0352112	0.0654619	0.0633494	0.0994036	0.000434628	4.05012e-06	2.46804e-05	0.000164283	435		7.04909	37	0.029445	-0.00056615	1.05693	0.0463222	404.228	6.01275	-0.0167051	0.0559696	18.7645	0.0899147	2.70426	5.54602	0.00864314	17.8326	61.3624	81.6994	119.685	19.6872	0.261296	0.00421341	0.0109235
JP1	1.61222	1	-0.000550938	0.000152141	0.00385072	0.00690594	0.0190834	2.21191	0.000572793	5.65081e-05	0.0121041	0.000268761	0.00177666	0.00377615	0.000260039	0.00646228	0.0334782	0.0609528	0.0579437	0.0894696	0.00053727	4.04532e-06	5.90365e-05	6.09327e-05	436		6.91316	37	0.0187945	6.61991e-05	0.875676	0.0374827	398.699	5.91392	0.812918	0.0559034	16.4084	0.183943	2.64978	6.48416	0.116065	18.7084	58.3422	76.0719	109.472	17.7197	0.323003	0.00420842	0.0261294
JP1	1.58891	1	-0.00354532	-0.00170757	0.00434884	0.00807771	0.0179737	2.0686	0.000159509	0.00029598	0.0128771	0.000130679	0.00115295	0.00341815	0.000121992	0.00520185	0.0303164	0.058599	0.0521926	0.0822887	0.000466568	4.02865e-06	2.45496e-05	0.000129169	437		6.81325	37	0.120944	-0.000742991	0.988951	0.0438426	375.514	5.53076	0.226379	0.292812	17.4562	0.089438	1.71956	5.86942	0.0544497	15.0595	52.8323	73.1342	98.6066	16.2975	0.280497	0.00419107	0.0108656
JP1	1.54237	1	-0.00298656	0.00112129	0.00447412	0.00667174	0.0189651	2.03717	0.000489391	0.000121642	0.0128895	0.000260959	0.00145798	0.00353298	0.000219103	0.00467111	0.0297592	0.0527998	0.0457847	0.0696356	0.000655221	3.7315e-05	-9.45149e-06	5.91638e-05	438		6.61368	37	0.101882	0.000487893	1.01744	0.0362116	396.228	5.44672	0.694552	0.12034	17.4731	0.178603	2.1745	6.06661	0.0977935	13.5229	51.8612	65.8965	86.5003	13.7915	0.393915	0.0388194	-0.0041832
JP1	1.55057	1	-0.000815609	0.00134309	0.00457614	0.00633235	0.017893	2.14846	2.23062e-05	0.000191285	0.0113548	0.000231037	0.00148018	0.00348509	0.000256334	0.00487781	0.0267099	0.0460715	0.0401472	0.0655923	0.000563512	3.9877e-06	-9.5954e-06	9.39601e-05	439		6.64882	37	0.0278234	0.000584403	1.04064	0.0343695	373.828	5.74428	0.0316574	0.189238	15.3926	0.158124	2.20761	5.98437	0.114411	14.1214	46.5472	57.4993	75.8493	12.9907	0.338779	0.00414847	-0.0042469
JP1	1.61237	1	-0.00243983	-0.00113681	0.00443994	0.00606294	0.0176137	2.23251	0.000196251	2.23157e-05	0.0110636	0.000340474	0.00206962	0.00294194	0.000192935	0.0056508	0.0260102	0.0403489	0.0376686	0.0531657	0.000264473	4.08059e-06	2.48661e-05	2.67788e-05	440		6.91382	37	0.0832314	-0.000494648	1.00967	0.0329072	367.992	5.96901	0.278523	0.0220769	14.9979	0.233023	3.08672	5.05171	0.086114	16.3592	45.3279	50.3572	71.1667	10.5296	0.158999	0.0042451	0.0110057
JP1	1.69405	1	-0.0023986	0.0040043	0.0052156	0.00755949	0.0151861	2.35107	9.76184e-05	6.03533e-05	0.0098028	0.000397225	0.00208118	0.00381275	5.73829e-05	0.00499085	0.0261776	0.0388869	0.0323644	0.0483389	0.000573829	4.10456e-05	6.30537e-05	2.83539e-05	441		7.26406	37	0.0818251	0.00174234	1.18606	0.0410299	317.275	6.286	0.138542	0.0597074	13.2887	0.271864	3.10395	6.54702	0.0256121	14.4486	45.6195	48.5325	61.1454	9.57364	0.344982	0.0427005	0.0279074
JP1	1.50726	1	-0.00299298	-0.00110915	0.0048737	0.00645755	0.0147404	2.16969	0.000123793	0.000157137	0.00916835	0.000196825	0.00164701	0.00327645	0.000188241	0.0048023	0.022663	0.0322662	0.0256475	0.0380984	0.000393402	7.16633e-05	2.4261e-05	5.99683e-05	442		6.46311	37	0.102102	-0.000482612	1.10831	0.035049	307.963	5.80103	0.17569	0.155455	12.4287	0.134709	2.45642	5.62611	0.0840187	13.9027	39.4946	40.2697	48.4553	7.5455	0.236511	0.0745526	0.0107379
JP1	1.55045	1	-0.00241706	0.00232917	0.00474212	0.00559334	0.0136575	2.24143	0.000297503	2.21075e-05	0.00865576	0.00016549	0.00146617	0.00308629	0.000122412	0.00477305	0.0201182	0.028005	0.0246636	0.0317985	0.00039945	4.04251e-06	2.4634e-05	6.08903e-05	443		6.64834	37	0.0824547	0.00101346	1.07839	0.0303584	285.339	5.99284	0.422222	0.0218709	11.7338	0.113263	2.1867	5.29959	0.054637	13.8181	35.0598	34.9515	46.5964	6.29779	0.240147	0.00420549	0.010903
JP1	1.61596	1	-0.00336565	0.000434765	0.00401076	0.00581763	0.0140733	2.21681	9.2714e-05	2.24411e-05	0.00920531	6.33482e-05	0.00187198	0.00243493	8.93799e-05	0.00498461	0.0209112	0.0232508	0.0201757	0.0285749	0.000440359	-3.07764e-05	-9.87411e-06	0.000166449	444		6.92922	37	0.114815	0.000189174	0.91207	0.0315758	294.026	5.92703	0.131581	0.022201	12.4788	0.043356	2.79194	4.18111	0.0398935	14.4306	36.4418	29.018	38.1175	5.65935	0.264741	-0.0320172	-0.00437025
JP1	1.51774	1	-0.00244172	-0.00100417	0.00435369	0.00586534	0.0135489	2.08926	2.22089e-05	2.17126e-05	0.00846741	0.000162534	0.00211493	0.00306492	0.000255216	0.00478904	0.0191838	0.0205001	0.0166801	0.0228821	0.000324821	3.97031e-06	-9.55355e-06	-7.69247e-06	445		6.50807	37	0.0832961	-0.000436933	0.990056	0.0318347	283.07	5.58599	0.0315193	0.0214802	11.4785	0.11124	3.1543	5.26288	0.113912	13.8644	33.4315	25.5851	31.5135	4.53187	0.19528	0.00413038	-0.00422838
JP1	1.57336	1	-0.00251879	0.000118872	0.00466517	0.00538798	0.012999	2.21117	5.77226e-05	0.000196462	0.00838619	0.000202477	0.00162468	0.00316166	0.000228459	0.00469616	0.0173475	0.0189143	0.0164393	0.021095	0.000369886	3.89084e-05	2.49577e-05	-7.93526e-06	446		6.74657	37	0.0859251	5.17231e-05	1.06089	0.0292438	271.581	5.91194	0.0819211	0.194359	11.3684	0.138577	2.42312	5.42899	0.10197	13.5955	30.2314	23.6059	31.0585	4.17793	0.222373	0.0404771	0.0110462
JP1	1.65978	1	-0.00195841	-0.00275005	0.00452535	0.00646775	0.0127182	2.24775	0.000196949	9.20119e-05	0.00918642	9.80266e-05	0.00190294	0.00385742	0.000298047	0.00459114	0.018636	0.0198886	0.0157401	0.0200815	0.000578689	3.89035e-05	2.49545e-05	9.64909e-05	447		7.11711	37	0.0668084	-0.00119659	1.02909	0.0351044	265.715	6.00975	0.279514	0.0910272	12.4532	0.0670902	2.83813	6.62373	0.133029	13.2915	32.4769	24.8219	29.7374	3.9772	0.347904	0.040472	0.0110448
JP1	1.65016	1	-0.00221235	-0.000864474	0.00464846	0.00740392	0.0113681	2.26101	0.000127846	5.74344e-05	0.010518	0.00016832	0.00180578	0.00355845	0.000124505	0.00541385	0.0199369	0.0185332	0.0145433	0.0193231	0.000406281	0.000178856	-9.89361e-06	6.19315e-05	448		7.07587	37	0.0754713	-0.000376148	1.05709	0.0401856	237.507	6.04521	0.181442	0.0568197	14.2583	0.1152	2.69321	6.11035	0.0555713	15.6732	34.7439	23.1303	27.4764	3.827	0.244253	0.186067	-0.00437889
JP1	1.55362	1	0.000345138	0.012683	0.00363888	0.00737588	0.010041	2.18285	0.000328492	0.000157931	0.0104745	0.000299857	0.00196145	0.0035311	0.000189193	0.00598368	0.0185846	0.0175933	0.0124502	0.0182943	0.000599464	0.00014005	-9.62844e-06	9.42837e-05	449		6.66191	37	-0.0117739	0.00551857	0.827502	0.0400334	209.781	5.83623	0.466203	0.156241	14.1993	0.205225	2.92539	6.06339	0.0844436	17.3229	32.3872	21.9572	23.5219	3.62325	0.360394	0.145696	-0.00426152
JP1	1.50265	1	-0.00109193	0.0198427	0.00392294	0.00804054	0.00940199	2.09873	0.000285427	0.000186043	0.0104495	0.000257672	0.00167039	0.00348848	5.15102e-05	0.0054038	0.0181784	0.0201579	0.0138832	0.016709	0.000284336	3.6845e-05	5.66006e-05	5.84186e-05	450		6.44336	37	0.0372498	0.0086339	0.892098	0.0436409	196.431	5.61133	0.405084	0.184052	14.1654	0.176353	2.49128	5.9902	0.0229909	15.6441	31.6794	25.1579	26.2294	3.30926	0.170941	0.0383304	0.0250513
JP1	1.5295	1	-0.00129726	0.0342167	0.00438652	0.00737369	0.010004	2.19931	0.000634413	8.98804e-05	0.0115608	0.000129758	0.00175685	0.00370006	0.000155134	0.0060159	0.0179316	0.0183718	0.0142513	0.0182889	0.000463278	7.20043e-05	5.83785e-05	9.42556e-05	451		6.55849	37	0.0442543	0.0148883	0.99752	0.0400214	209.008	5.88025	0.900371	0.0889185	15.6719	0.0888073	2.62025	6.35351	0.0692421	17.4161	31.2493	22.9288	26.9248	3.62217	0.278519	0.0749073	0.0258382
JP1	1.46022	1	-0.00124386	0.0536161	0.00502167	0.00697203	0.00799144	2.14415	0.00077131	0.000183988	0.0162766	0.000450441	0.00184755	0.00364556	0.000116146	0.00550712	0.019121	0.0188571	0.0136321	0.0166225	0.000444208	0.000101643	5.59754e-05	0.000122978	452		6.26143	37	0.0424327	0.0233293	1.14196	0.0378414	166.961	5.73275	1.09466	0.182019	22.0646	0.308285	2.75551	6.25993	0.0518402	15.9432	33.322	23.5344	25.7549	3.29214	0.267055	0.105741	0.0247746
JP1	1.57726	1	0.000490529	0.0679368	0.00436248	0.00716154	0.00807069	2.30734	0.00113074	-1.23474e-05	0.0145458	0.000582236	0.00161585	0.00449514	1.94758e-05	0.00643748	0.0213129	0.0192626	0.0128821	0.018242	0.000575617	4.07336e-06	5.94456e-05	0.000199849	453		6.76329	37	-0.0167337	0.0295605	0.992054	0.03887	168.616	6.16908	1.60477	-0.0122152	19.7184	0.398487	2.40995	7.71876	0.00869274	18.6366	37.1418	24.0406	24.3379	3.61288	0.346057	0.00423758	0.0263105
JP1	1.5991	1	-0.00276428	0.0753843	0.0045614	0.00887577	0.00672117	2.30335	0.00103263	2.24012e-05	0.0166152	0.000237325	0.00176419	0.0043111	0.000367763	0.00664804	0.0244689	0.0208014	0.0141051	0.019181	0.0006833	0.000178185	0.000164233	6.16993e-05	454		6.85691	37	0.0942994	0.032801	1.03729	0.0481741	140.422	6.15842	1.46553	0.0221614	22.5237	0.162427	2.63119	7.40275	0.164146	19.2462	42.6418	25.9611	26.6485	3.79886	0.410796	0.185369	0.072689
JP1	1.50208	1	-0.00117053	0.0700282	0.00423124	0.00769234	0.0062313	2.17937	0.000821545	0.000188023	0.0170673	0.00032705	0.00185475	0.00345898	8.5376e-05	0.00606137	0.0241162	0.0193706	0.0138644	0.0186547	0.000620538	0.000337094	0.000157156	0.000125675	455		6.44092	37	0.0399309	0.0304705	0.962208	0.041751	130.187	5.82691	1.16595	0.186011	23.1366	0.223836	2.76626	5.93954	0.0381064	17.5478	42.0271	24.1754	26.1939	3.69461	0.373063	0.350685	0.0695567
JP1	1.51457	1	-0.00128446	0.063945	0.00394191	0.00930082	0.00698757	2.2025	0.000956471	0.000264323	0.0203139	0.000166553	0.0018214	0.00397066	0.000226944	0.00805648	0.0237139	0.0201753	0.012832	0.0180126	0.000505761	0.000280724	5.93742e-05	0.000199609	456		6.49446	37	0.0438176	0.0278236	0.896414	0.0504812	145.987	5.88876	1.35744	0.261494	27.5377	0.11399	2.71651	6.81817	0.101293	23.3237	41.326	25.1796	24.2433	3.56744	0.30406	0.292042	0.0262789
JP1	1.53741	1	-0.00267313	0.0502725	0.00373692	0.00834707	0.00599382	2.12429	0.000459864	0.000291021	0.0190693	0.000195829	0.00167235	0.00430396	0.000355637	0.00703522	0.0229533	0.018462	0.0126622	0.0178745	0.000593429	0.00013864	-9.53151e-06	0.000228014	457		6.59242	37	0.09119	0.0218744	0.849798	0.0453046	125.226	5.67966	0.652648	0.287906	25.8505	0.134027	2.49421	7.3905	0.158734	20.3671	40.0006	23.0413	23.9225	3.54009	0.356766	0.14423	-0.00421862
JP1	1.56335	1	-0.000961936	0.046572	0.00404044	0.00890046	0.00462188	2.15963	0.000399193	0.000330206	0.0187071	0.000130672	0.00135834	0.00396584	0.000327436	0.00732628	0.0225194	0.0200453	0.0140433	0.0169783	0.000671994	0.000380687	9.30317e-05	0.000540062	458		6.70364	37	0.0328151	0.0202643	0.918819	0.0483081	96.5624	5.77415	0.566542	0.326672	25.3594	0.0894334	2.02588	6.80988	0.146147	21.2097	39.2444	25.0174	26.5317	3.3626	0.403998	0.396035	0.0411756
JP1	1.59358	1	-0.00374894	0.0525869	0.00481508	0.00884714	0.00413497	2.26302	0.000530885	0.000564292	0.0173004	0.000332816	0.0015145	0.00406244	0.00035812	0.00688091	0.0231475	0.0200861	0.0127506	0.015013	0.000529763	0.000207418	2.43068e-05	0.000161796	459		6.83325	37	0.12789	0.0228815	1.09498	0.0480188	86.3896	6.05057	0.753442	0.558252	23.4525	0.227782	2.25879	6.97576	0.159842	19.9204	40.339	25.0683	24.0896	2.97336	0.31849	0.21578	0.0107581
JP1	1.77639	1	-0.00151765	0.0480674	0.00401791	0.0105096	0.00411958	2.24528	0.000331677	0.000434197	0.0174887	0.000543157	0.00129363	0.00404612	0.000225368	0.00751941	0.0220001	0.0197254	0.0132588	0.0167529	0.000433566	0.000107066	-9.72178e-06	9.51977e-05	460		7.61715	37	0.0517726	0.020915	0.913697	0.0570422	86.0682	6.00314	0.470722	0.429551	23.7078	0.371741	1.92937	6.94774	0.10059	21.7688	38.3394	24.6182	25.0495	3.31795	0.260657	0.111382	-0.00430283
JP1	1.61446	1	-0.00265408	0.0528139	0.0041157	0.00987754	0.00504143	2.31009	0.000502746	0.000227856	0.0182224	0.000233783	0.00122339	0.00428106	0.00025938	0.00788748	0.0210093	0.020044	0.0127953	0.0165258	0.000535909	0.000141228	2.45888e-05	0.000129375	461		6.92281	37	0.0905403	0.0229802	0.935934	0.0536114	105.328	6.17643	0.713507	0.225418	24.7024	0.160003	1.82461	7.35117	0.115771	22.8344	36.6128	25.0158	24.174	3.27298	0.322185	0.146922	0.0108829
JP1	1.55883	1	-0.00108692	0.0687253	0.00396005	0.00832339	0.00477172	2.16825	0.000597678	0.000461791	0.0164909	0.000298404	0.00174886	0.00381861	0.000289817	0.00764839	0.0215813	0.0198485	0.0119492	0.0155294	0.000359627	3.78293e-05	0.000125807	0.000161521	462		6.68426	37	0.0370788	0.0299036	0.900538	0.045176	99.6929	5.79719	0.848236	0.456849	22.3551	0.20423	2.60832	6.55707	0.129356	22.1422	37.6097	24.7719	22.5753	3.07563	0.216206	0.0393545	0.055682
JP1	1.53949	1	-0.00317474	0.0901672	0.00393945	0.00991761	0.00519615	2.14046	0.00134696	0.000293567	0.0173308	0.000435294	0.00161905	0.00430733	0.000154963	0.00702885	0.0214859	0.0200191	0.0111404	0.0158551	0.000700516	-2.99686e-05	2.43495e-05	0.00016208	463		6.60132	37	0.108302	0.0392333	0.895853	0.0538289	108.56	5.72288	1.91164	0.290426	23.4937	0.297919	2.41472	7.39627	0.0691655	20.3487	37.4433	24.9848	21.0473	3.14016	0.421146	-0.0311768	0.010777
JP1	1.54768	1	-0.00197811	0.102089	0.00499062	0.00875564	0.00549915	2.12639	0.00107466	0.000293406	0.014975	0.000129543	0.00155027	0.00369394	0.000154878	0.00777248	0.0243666	0.0185115	0.0111003	0.016118	0.000496457	3.99362e-06	-9.60965e-06	9.40997e-05	464		6.63642	37	0.0674803	0.0444207	1.1349	0.0475221	114.891	5.68526	1.52518	0.290266	20.3001	0.0886604	2.31214	6.343	0.0691275	22.5015	42.4635	23.1031	20.9716	3.19222	0.298467	0.00415463	-0.00425321
JP1	1.52768	1	-0.00104392	0.111988	0.00426542	0.0096397	0.00391726	2.29088	0.00123658	0.00040378	0.0155068	0.00047913	0.00161843	0.00464104	8.88647e-05	0.00762789	0.0237457	0.0169654	0.0119303	0.0134466	0.000680573	0.000281511	9.42195e-05	0.000200169	465		6.55069	37	0.0356119	0.0487281	0.969981	0.0523205	81.8412	6.12508	1.75498	0.399458	21.0211	0.327921	2.4138	7.96929	0.0396635	22.0829	41.3814	21.1736	22.5397	2.66314	0.409156	0.292861	0.0417013
JP1	1.53257	1	-0.00195927	0.100388	0.0039002	0.00779632	0.00425376	2.27817	0.00140629	0.000129196	0.0153945	0.000419006	0.0016549	0.00414244	0.000161788	0.00882919	0.0241027	0.0189821	0.0115956	0.0131819	0.00236255	3.96322e-05	2.54219e-05	6.28378e-05	466		6.57165	37	0.0668379	0.0436804	0.886927	0.0423153	88.8713	6.09109	1.99583	0.127813	20.8689	0.286771	2.46819	7.11313	0.0722118	25.5607	42.0037	23.6905	21.9073	2.61071	1.42035	0.04123	0.0112517
JP1	1.51128	1	-0.00134214	0.06494	0.00415506	0.00921151	0.00361161	2.31655	0.000891017	0.000312328	0.0135883	0.000210167	0.00172252	0.00425737	0.000164865	0.00650166	0.0234746	0.0180037	0.0103328	0.013975	0.000673012	4.25116e-06	2.59055e-05	0.000136303	467		6.48037	37	0.0457853	0.0282565	0.944885	0.0499964	75.4554	6.1937	1.26455	0.308985	18.4204	0.14384	2.56904	7.31049	0.0735854	18.8224	40.9091	22.4694	19.5216	2.7678	0.404611	0.00442256	0.0114657
JP1	1.44515	1	-0.00137962	0.046412	0.00465036	0.00926285	0.00387325	2.18677	0.000375463	5.78931e-05	0.013565	0.000134436	0.00143269	0.00397438	0.000231184	0.00654986	0.0212259	0.0163872	0.00926255	0.0115444	0.000339069	4.14447e-06	-9.97263e-06	0.00016811	468		6.19677	37	0.0470637	0.0201947	1.05752	0.0502751	80.9216	5.84671	0.532864	0.0572735	18.3888	0.0920093	2.13678	6.82455	0.103186	18.962	36.9902	20.4519	17.4996	2.28641	0.203846	0.00431156	-0.00441386
JP1	1.37626	1	0.000277159	0.0311033	0.00459829	0.00827305	0.00285889	2.12787	0.000533306	5.59728e-05	0.0103869	0.000232155	0.00193012	0.00449002	0.000189456	0.00687823	0.020044	0.0142741	0.00810314	0.00921911	0.000327823	3.80665e-05	-9.64184e-06	2.62959e-05	469		5.90141	37	-0.0094549	0.0135336	1.04568	0.0449028	59.7291	5.68922	0.756878	0.0553737	14.0806	0.158889	2.87866	7.70998	0.0845611	19.9126	34.9305	17.8148	15.3091	1.82587	0.197085	0.0396012	-0.00426745
JP1	1.3839	1	-0.00234938	0.0172591	0.00467616	0.00769703	0.00281682	2.15186	0.000332061	-1.22611e-05	0.0105539	0.000337496	0.00222343	0.00401642	0.000122485	0.00625497	0.018683	0.0150291	0.00752585	0.00923755	0.000159015	4.0449e-06	-9.73304e-06	9.5308e-05	470		5.93416	37	0.080146	0.00750971	1.06339	0.0417764	58.8503	5.75336	0.471267	-0.0121299	14.307	0.230986	3.31612	6.89675	0.0546694	18.1083	32.5587	18.757	14.2185	1.82952	0.0955989	0.00420798	-0.00430782
JP1	1.44361	1	-0.000209626	0.0130612	0.0048957	0.00806034	0.00260348	2.32623	0.000304907	5.7874e-05	0.00961141	0.000204825	0.00118571	0.00450167	0.000442406	0.00654771	0.0184308	0.0140184	0.00651016	0.00851063	0.000162876	4.14311e-06	-9.96935e-06	-8.02727e-06	471		6.19019	37	0.00715109	0.00568316	1.11331	0.0437483	54.3931	6.21958	0.432729	0.0572547	13.0293	0.140184	1.76841	7.72999	0.197462	18.9557	32.1193	17.4956	12.2995	1.68555	0.0979199	0.00431014	-0.00441241
JP1	1.45175	1	0.000141378	0.0241936	0.00478492	0.00739538	0.00278551	2.22977	0.000332427	9.0984e-05	0.0105311	0.000269029	0.0022603	0.00381433	0.000225878	0.00670966	0.015876	0.0121499	0.00605307	0.00601091	0.000331288	0.000141727	-9.74376e-06	9.54129e-05	472		6.22509	37	-0.00482292	0.0105271	1.08812	0.0401392	58.196	5.96168	0.471786	0.0900102	14.2761	0.184126	3.37111	6.54973	0.100818	19.4246	27.667	15.1636	11.436	1.19048	0.199168	0.147441	-0.00431256
JP1	1.43594	1	-0.00105156	0.0452432	0.00457644	0.00789025	0.00202323	2.37001	0.0010011	0.000127273	0.00988365	0.000133309	0.00204947	0.00450034	0.000194313	0.00673983	0.0149931	0.0117365	0.00558404	0.00631012	0.000161564	4.10973e-06	-9.88903e-06	2.69701e-05	473		6.15729	37	0.0358726	0.0196861	1.04071	0.0428251	42.2703	6.33663	1.42079	0.125911	13.3983	0.091238	3.05666	7.72769	0.086729	19.5119	26.1284	14.6477	10.5498	1.24974	0.097131	0.00427542	-0.00437686
JP1	1.42584	1	-0.0013074	0.0730144	0.00471699	0.00830321	0.00225023	2.32411	0.00224108	-1.25528e-05	0.00830335	0.000310325	0.00174833	0.00460511	0.000301395	0.00728445	0.0159534	0.0117557	0.00580268	0.00530198	0.000444393	4.14111e-06	-9.96456e-06	0.000167974	474		6.11398	37	0.0446	0.0317698	1.07267	0.0450665	47.0129	6.21392	3.18059	-0.0124184	11.2561	0.212389	2.60753	7.9076	0.134524	21.0886	27.8019	14.6717	10.9629	1.05007	0.267166	0.00430807	-0.00441029
JP1	1.33251	1	0.00120962	0.0888994	0.00483009	0.00622241	0.00189577	2.16336	0.00192075	2.14291e-05	0.00999055	0.000360254	0.00208732	0.00365773	0.000151963	0.00612607	0.0159966	0.0113572	0.00545739	0.00545024	0.000320579	3.72254e-05	9.0492e-05	0.000158943	475		5.71379	37	-0.0412647	0.0386817	1.09839	0.0337728	39.6072	5.78413	2.72596	0.0211998	13.5432	0.246561	3.11311	6.28082	0.0678266	17.7351	27.8772	14.1742	10.3106	1.07943	0.19273	0.0387262	0.0400515
JP1	1.34286	1	0.000106375	0.103246	0.00501455	0.00689728	0.0027449	2.1251	0.00153365	2.20951e-05	0.00916675	9.67135e-05	0.00170574	0.00339365	0.000191028	0.00624779	0.0142235	0.0104034	0.00469943	0.0048981	9.01481e-05	0.000107067	2.46203e-05	0.000129541	476		5.75817	37	-0.00362883	0.0449241	1.14034	0.0374357	57.3477	5.68182	2.17659	0.0218587	12.4265	0.0661916	2.54402	5.82736	0.0852628	18.0875	24.7871	12.9839	8.87855	0.970083	0.0541965	0.111383	0.0108969
JP1	1.3808	1	0.000355118	0.102283	0.00427571	0.00671049	0.003008	2.0732	0.00138155	-1.55627e-05	0.0083729	0.000253816	0.00142567	0.00326507	0.000155467	0.00448999	0.01152	0.00924485	0.00383207	0.00399813	0.000158194	-3.85057e-05	-1.23539e-05	0.000120972	477		5.92086	37	-0.0121144	0.0445051	0.972322	0.0364219	62.8446	5.54307	1.96072	-0.0153962	11.3503	0.173714	2.12631	5.60658	0.0693904	12.9986	20.0758	11.538	7.23986	0.79184	0.0951052	-0.0400581	-0.00546781
JP1	1.44823	1	-0.00197962	0.103776	0.00523551	0.00589822	0.00169431	2.13441	0.00160928	0.000247831	0.00815071	0.000327607	0.00147398	0.00284393	0.000106285	0.00454917	0.0132589	0.00923707	0.00440863	0.00419062	0.000586692	-6.00197e-05	-1.92563e-05	-1.55051e-05	478		6.21001	37	0.067532	0.0451546	1.19058	0.0320132	35.3982	5.70671	2.28392	0.245179	11.0491	0.224217	2.19836	4.88342	0.0474388	13.1699	23.1061	11.5283	8.32914	0.829965	0.352716	-0.0624395	-0.0085228
JP1	1.58058	1	-0.00846627	0.111207	0.00634102	0.00806339	0.0033816	2.38311	0.00105667	-3.90169e-05	0.0108111	0.000198704	0.00149551	0.00446482	-4.78661e-05	0.00490889	0.0123488	0.00807155	0.0042452	0.00477092	0.000615421	1.28715e-05	-3.09722e-05	0.000193878	479		6.77749	37	0.288815	0.0483882	1.44199	0.0437649	70.6498	6.37166	1.49965	-0.0385993	14.6555	0.135995	2.23047	7.6667	-0.0213644	14.2113	21.5202	10.0737	8.02037	0.944894	0.369987	0.0133905	-0.0137082
JP1	1.74984	1	-0.0118352	0.121974	0.00541211	0.00854237	0.00278726	2.54332	0.00274052	-6.66743e-05	0.0108072	0.000526521	0.00199473	0.0048253	-8.17964e-05	0.00502326	0.0128741	0.00874327	0.00407607	0.00478749	0.000490778	0.000208959	-5.29271e-05	-4.26166e-05	480		7.5033	37	0.403743	0.0530729	1.23075	0.0463646	58.2327	6.80001	3.8894	-0.0659608	14.6503	0.360356	2.97503	8.2857	-0.0365087	14.5424	22.4357	10.912	7.70084	0.948176	0.295053	0.217383	-0.0234254
JP1	1.72414	1	-0.0248108	0.123745	0.00656295	0.00713658	0.0032615	2.44362	0.000874979	0.000211786	0.0130993	0.000268666	0.00252449	0.00289965	0.000185161	0.0045649	0.0131174	0.0088103	0.00355558	0.00579567	0.000205735	0.000697078	0.00023599	-7.50327e-05	481		7.39308	37	0.846387	0.0538437	1.49245	0.0387345	68.1408	6.53346	1.24179	0.209519	17.7574	0.183877	3.76513	4.9791	0.0826443	13.2155	22.8596	10.9956	6.7175	1.14785	0.123687	0.725182	0.104449
JP1	1.73079	1	-0.0560775	0.124609	0.00379466	0.0118585	0.00323159	2.73891	0.00473578	-0.000195062	0.00699809	-0.000100547	0.0025539	0.00427125	0.000307675	0.00649133	0.013592	0.00807596	0.00317327	0.00306669	-0.000205117	6.43503e-05	-0.000154843	0.000422299	482		7.42163	37	1.91301	0.0542197	0.862927	0.0643635	67.5158	7.32295	6.72111	-0.192974	9.48665	-0.0688155	3.809	7.33432	0.137326	18.7925	23.6867	10.0792	5.99521	0.607367	-0.123315	0.0669447	-0.0685331
JP1	1.83686	1	-0.118204	0.0895782	0.00668695	0.00354723	0.00280306	2.77073	0.00256209	0.000620146	0.0161876	0.000786699	0.000644952	0.00559903	-0.000421699	0.00565573	0.0123852	0.0113398	0.00366418	0.00636801	0.000602428	0.000113398	-0.000272864	-0.000219709	483		7.87644	37	4.03235	0.038977	1.52065	0.019253	58.5628	7.40804	3.63616	0.613509	21.944	0.538424	0.961908	9.6143	-0.18822	16.3735	21.5836	14.1526	6.92266	1.2612	0.362175	0.11797	-0.120769
JP1	3.73028	1	-0.0586558	0.35138	0.0160606	0.0184763	-0.00680453	7.16162	-0.00111216	0.00534556	0.0155942	0.00265484	0.00542927	0.00588371	-0.00142309	0.0158334	0.0255319	0.0154985	0.0123654	0.00847876	0.00203299	0.00363546	-0.000920824	-0.000741443	484		15.9954	37	2.00096	0.152892	3.65228	0.100282	-142.163	19.1478	-1.5784	5.28835	21.1396	1.817	8.09745	10.1031	-0.635178	45.838	44.4944	19.3429	23.3616	1.67924	1.22222	3.78203	-0.407554
JP2	0.901946	1	-0.0139268	10.9756	0.00151785	0.00309187	0.00186467	1.19883	0.102271	0.0140131	0.00185203	0.000695039	-0.000102501	0.000686615	0.00101518	0.00186186	0.0110237	0.0144386	0.0159648	0.0243432	-0.000124967	0.00923911	-7.0206e-05	-5.47607e-05	1		3.86754	37	0.475093	4.77569	0.345169	0.0167815	38.9575	3.20528	145.145	13.8631	2.51063	0.475691	-0.152874	1.17901	0.453111	5.39013	19.211	18.02	30.1621	4.82124	-0.0751291	9.6116	-0.031073
JP2	1.14455	1	-0.0041185	9.80683	0.00213811	0.00193701	0.00341279	1.16243	0.0872232	0.0127083	0.00126838	8.77598e-05	0.000292401	0.000620615	0.000177487	0.0011641	0.00587389	0.0105786	0.00950667	0.0123901	-3.50252e-05	0.00376698	-1.96771e-05	9.16952e-05	2		4.90783	37	0.140497	4.26712	0.486219	0.0105133	71.3015	3.10796	123.789	12.5723	1.71943	0.0600635	0.4361	1.06568	0.079219	3.37008	10.2364	13.2025	17.9608	2.4539	-0.0210569	3.91885	-0.00870902
JP2	1.12292	1	0.000800681	8.64385	0.00203028	0.00156384	0.00331058	1.22362	0.0736539	0.00858048	0.00168258	0.000258648	0.00052352	0.000798847	0.000383118	0.00100721	0.00595008	0.00885905	0.00730076	0.0108852	4.55559e-05	0.00143489	-1.2447e-05	5.80029e-05	3		4.81506	37	-0.0273141	3.76109	0.461698	0.00848789	69.166	3.27155	104.531	8.48866	2.28091	0.177021	0.780799	1.37173	0.170999	2.91589	10.3692	11.0565	13.7932	2.15585	0.0273879	1.49274	-0.005509
JP2	1.05575	1	0.00102417	7.8211	0.00245235	0.00152612	0.00264409	1.25747	0.0616946	0.00675694	0.00146448	0.000138349	0.000183082	0.000676954	0.0002776	0.00161293	0.0054893	0.00735177	0.00769552	0.0118633	3.30089e-05	0.00177563	8.91061e-05	9.10903e-05	4		4.52703	37	-0.0349383	3.4031	0.557679	0.00828316	55.2415	3.36207	87.5582	6.68463	1.98525	0.0946873	0.273057	1.16242	0.123903	4.66946	9.56618	9.17534	14.539	2.34955	0.0198448	1.84722	0.0394381
JP2	1.0294	1	0.00182374	6.6051	0.00343848	0.00149568	0.00360037	1.35261	0.0542133	0.00475195	0.00156792	7.5388e-05	0.000403135	0.000778704	0.00048294	0.00165183	0.0055466	0.00873598	0.00828015	0.00877301	0.000110721	0.00104355	-7.61495e-06	-5.93966e-06	5		4.41404	37	-0.0622145	2.87399	0.78193	0.00811798	75.2205	3.61643	76.9406	4.70109	2.12548	0.0515962	0.601253	1.33714	0.215554	4.78209	9.66602	10.9029	15.6435	1.73752	0.0665649	1.08562	-0.00337036
JP2	1.09928	1	0.000427573	5.61525	0.00371691	0.00119024	0.00379195	1.5519	0.0436801	0.00536581	0.00129871	0.000230091	0.000503352	0.00066411	0.000460909	0.00224898	0.0065595	0.00758589	0.00703185	0.00876855	6.61349e-05	0.000719198	3.2268e-05	-5.6687e-06	6		4.71368	37	-0.0145861	2.44329	0.845246	0.00646016	79.2231	4.14927	61.9916	5.30839	1.76054	0.157476	0.75072	1.14037	0.205721	6.51084	11.4312	9.46753	13.2852	1.73664	0.0397598	0.748194	0.0142817
JP2	1.1455	1	0.00272343	4.24695	0.00565363	0.00128825	0.00381359	1.75504	0.033693	0.00362236	0.00223332	0.000176872	0.00043051	0.000799904	0.000611294	0.00208748	0.00583159	0.007996	0.00612287	0.00857925	6.13858e-05	0.000630857	-6.74569e-06	-5.26164e-06	7		4.91191	37	-0.0929061	1.84792	1.28567	0.00699213	79.6752	4.69242	47.8177	3.58359	3.0275	0.121053	0.64208	1.37354	0.272843	6.0433	10.1627	9.97936	11.5678	1.69914	0.0369047	0.656291	-0.00298562
JP2	1.20105	1	-0.000189355	3.26797	0.00555565	0.00201051	0.0031139	1.91842	0.0239135	0.00253309	0.00239544	0.000172686	0.000886086	0.000960113	0.000704311	0.00243219	0.00630301	0.00676703	0.00547601	0.0069069	0.000131589	0.000400958	-6.58604e-06	3.06909e-05	8		5.15011	37	0.00645959	1.42195	1.26339	0.0109123	65.057	5.12923	33.9384	2.50598	3.24727	0.118188	1.32155	1.64865	0.31436	7.04123	10.9842	8.44556	10.3457	1.36793	0.0791105	0.417123	-0.00291496
JP2	1.22788	1	0.00061346	2.2265	0.00622688	0.00196926	0.002617	2.01893	0.0185666	0.00188138	0.00232426	0.000102633	0.00104573	0.00133931	0.00067909	0.00265276	0.00585671	0.00556304	0.00370595	0.00566909	0.00020647	0.000225337	-6.69054e-06	6.75745e-05	9		5.26515	37	-0.0209273	0.968789	1.41603	0.0106883	54.6755	5.39796	26.3501	1.86125	3.15077	0.0702429	1.55965	2.29978	0.303103	7.6798	10.2065	6.94292	7.00158	1.12278	0.124128	0.234422	-0.00296122
JP2	1.21772	1	0.00143024	1.52807	0.00623056	0.00259612	0.00378738	2.11367	0.0129911	0.00118718	0.00277961	3.1713e-05	0.000956651	0.00115262	0.000876445	0.00316742	0.00626305	0.00703478	0.00351309	0.00478677	6.47059e-05	8.47576e-05	-7.11054e-06	-5.54622e-06	10		5.22158	37	-0.0487906	0.664889	1.41687	0.0140907	79.1276	5.65126	18.4373	1.17447	3.76805	0.0217047	1.42679	1.9792	0.391189	9.16974	10.9146	8.77972	6.63722	0.948034	0.0389007	0.0881747	-0.00314711
JP2	1.2017	1	-0.000950412	1.0359	0.00797084	0.00325645	0.00345099	2.20382	0.00872704	0.000678359	0.00231086	7.39621e-05	0.00157412	0.00165809	0.00132728	0.00349052	0.0079631	0.0064968	0.00320304	0.00425718	0.000149269	0.000170337	-7.47091e-06	-5.82731e-06	11		5.1529	37	0.032422	0.450736	1.81262	0.0176747	72.0996	5.89229	12.3856	0.671099	3.13261	0.0506203	2.34771	2.84718	0.592415	10.1051	13.8773	8.10829	6.05144	0.843147	0.0897395	0.177204	-0.00330661
JP2	1.18432	1	0.000445644	0.602665	0.00758629	0.00297163	0.0033337	2.2655	0.00328254	0.000481752	0.00291986	0.000198609	0.00171961	0.00250526	0.00101607	0.00353902	0.0077441	0.0067931	0.00411329	0.00361583	2.77235e-05	4.90842e-05	0.000116045	-5.90828e-06	12		5.07834	37	-0.0152025	0.26223	1.72517	0.0161288	69.6492	6.05722	4.65864	0.476597	3.95818	0.13593	2.5647	4.30188	0.45351	10.2455	13.4956	8.47809	7.77117	0.716124	0.0166672	0.0510631	0.0513611
JP2	1.24298	1	0.000475433	0.341427	0.00824766	0.00350298	0.00305174	2.36762	0.0022379	0.000309233	0.00260774	0.0002742	0.00143663	0.00180115	0.00107182	0.00361433	0.0102519	0.00791559	0.00373199	0.00380949	6.72566e-05	4.78926e-05	-7.39084e-06	7.46475e-05	13		5.32989	37	-0.0162188	0.148561	1.87557	0.0190128	63.7583	6.33024	3.17608	0.305923	3.53507	0.187665	2.14265	3.09282	0.478392	10.4636	17.866	9.87901	7.05079	0.75448	0.0404342	0.0498235	-0.00327117
JP2	1.2828	1	0.000809113	0.219772	0.00924793	0.00383229	0.00272362	2.46023	0.00173632	0.000150269	0.00207009	0.000236928	0.00161749	0.00141663	0.0012481	0.00512563	0.0102176	0.00948164	0.00475624	0.00422365	0.00010881	-3.29275e-05	-7.48351e-06	7.55835e-05	14		5.50065	37	-0.0276018	0.0956266	2.10303	0.0208001	56.903	6.57786	2.46422	0.148661	2.80622	0.162156	2.41239	2.43255	0.557073	14.8388	17.8062	11.8335	8.98589	0.836506	0.065416	-0.034255	-0.00331218
JP2	1.24307	1	0.00101668	0.11806	0.009489	0.00313999	0.00233793	2.25758	0.000968932	0.000177205	0.0022989	0.000219839	0.00172747	0.00184329	0.000893662	0.00434005	0.0100477	0.00910034	0.00373289	0.00437231	0.000100962	7.22151e-06	-6.94376e-06	-5.41613e-06	15		5.33028	37	-0.0346828	0.05137	2.15785	0.0170426	48.845	6.03604	1.37513	0.175308	3.1164	0.15046	2.57642	3.16518	0.398874	12.5645	17.51	11.3576	7.05248	0.865948	0.0606979	0.00751266	-0.00307329
JP2	1.27995	1	-0.00103465	0.0988385	0.00861097	0.00336362	0.00218487	2.31194	0.000968065	6.38254e-05	0.00229684	0.000332863	0.00153722	0.00157746	0.000855121	0.00388328	0.011172	0.00954545	0.00456021	0.00433065	0.000138612	-3.05252e-05	-6.93754e-06	3.23289e-05	16		5.48842	37	0.0352957	0.0430063	1.95819	0.0182564	45.6473	6.18138	1.3739	0.0631423	3.11361	0.227815	2.29267	2.70871	0.381672	11.2422	19.4694	11.9132	8.61552	0.857698	0.0833327	-0.0317559	-0.00307054
JP2	1.21502	1	-0.00247921	0.049055	0.0090726	0.00379748	0.00191028	2.1557	0.000420783	9.71956e-05	0.00230637	0.000246309	0.00179613	0.001329	0.000782212	0.00454724	0.0103659	0.0107257	0.00356908	0.0046142	9.65317e-05	-2.92118e-05	-6.63905e-06	6.70544e-05	17		5.21	37	0.084575	0.0213447	2.06316	0.0206112	39.9104	5.76365	0.597183	0.0961554	3.12652	0.168576	2.67882	2.28208	0.34913	13.1643	18.0646	13.3861	6.74299	0.913854	0.0580342	-0.0303895	-0.00293843
JP2	1.22653	1	6.40124e-05	0.0403639	0.00903861	0.00268816	0.00195467	2.25122	0.000386301	6.13388e-05	0.00235244	0.000319895	0.0015136	0.00140719	0.000930616	0.00340556	0.0103374	0.00964544	0.0042012	0.00437955	2.44022e-05	7.94737e-05	-6.66726e-06	-5.20046e-06	18		5.25934	37	-0.00218369	0.017563	2.05543	0.0145903	40.8378	6.01903	0.548246	0.0606823	3.18898	0.218939	2.25745	2.41634	0.415368	9.85917	18.015	12.0379	7.93724	0.867382	0.0146704	0.0826779	-0.00295091
JP2	1.32439	1	-0.0010662	0.0259679	0.00957622	0.00435842	0.00205969	2.32519	0.000212028	2.59345e-05	0.00329668	0.000330941	0.00126569	0.00175596	0.00126293	0.00483681	0.011408	0.0101665	0.00400818	0.00411803	2.52448e-05	-3.03489e-05	6.8147e-05	3.21422e-05	19		5.67897	37	0.0363719	0.0112991	2.17769	0.0236558	43.0319	6.2168	0.300915	0.025657	4.46899	0.226499	1.8877	3.01522	0.563691	14.0027	19.8807	12.6882	7.57259	0.815587	0.015177	-0.0315725	0.0301617
JP2	1.33834	1	0.000246135	0.0176099	0.0101159	0.00402608	0.00177105	2.27488	-1.26516e-05	-1.11867e-05	0.00234943	0.000138368	0.00172901	0.00220231	0.000567191	0.00492296	0.010977	0.00908939	0.00401434	0.00462788	0.000241712	-2.92984e-05	-6.65873e-06	-5.19381e-06	20		5.73878	37	-0.00839655	0.00766238	2.30042	0.021852	37.0016	6.0823	-0.0179554	-0.011067	3.1849	0.0947006	2.57871	3.78167	0.253158	14.2521	19.1295	11.344	7.58422	0.916564	0.145316	-0.0304796	-0.00294714
JP2	1.38439	1	-0.00399226	0.0141531	0.0101176	0.00415446	0.00165553	2.33071	0.000213134	2.60697e-05	0.00297441	0.000181795	0.00176262	0.0023686	0.00111864	0.00520187	0.0106747	0.00935122	0.00444436	0.00474299	0.000100812	7.21078e-06	6.85024e-05	0.000107746	21		5.93626	37	0.13619	0.00615828	2.3008	0.0225488	34.588	6.23155	0.302484	0.0257907	4.03212	0.124422	2.62884	4.06721	0.49929	15.0595	18.6027	11.6707	8.39664	0.939362	0.0606077	0.00750149	0.030319
JP2	1.38704	1	-0.000158374	0.0157309	0.00900925	0.00434009	0.0011811	2.29474	6.11523e-05	2.5605e-05	0.00288434	0.000326736	0.00202756	0.00217819	0.00113574	0.00444194	0.0115228	0.00918451	0.00414248	0.00410275	0.000210151	-2.99633e-05	-6.80983e-06	3.17338e-05	22		5.94764	37	0.0054027	0.00684477	2.04876	0.0235563	24.676	6.1354	0.0867885	0.0253309	3.91002	0.223621	3.02399	3.74026	0.506924	12.8595	20.0807	11.4627	7.82631	0.812561	0.126342	-0.0311713	-0.00301402
JP2	1.35403	1	0.00156867	0.00730466	0.00862971	0.00513717	0.00170647	2.22585	-4.80761e-05	2.46275e-05	0.00320181	0.000136107	0.00155822	0.00180999	0.00105676	0.00534167	0.0112258	0.00883391	0.00377056	0.0033404	5.96039e-05	-2.88195e-05	-6.54988e-06	3.05224e-05	23		5.80608	37	-0.0535129	0.00317838	1.96245	0.0278825	35.6523	5.95119	-0.0682305	0.024364	4.34038	0.0931525	2.32399	3.10801	0.471669	15.4642	19.5631	11.0251	7.12365	0.661576	0.0358335	-0.0299814	-0.00289896
JP2	1.31793	1	-0.00105422	0.0070684	0.00908631	0.00468343	0.0019713	2.1497	2.25477e-05	2.3949e-05	0.00280174	6.30572e-05	0.00127274	0.00255741	0.000854393	0.00554134	0.0104307	0.00852086	0.00411746	0.00352556	2.33121e-05	-2.80254e-05	-6.36941e-06	2.96815e-05	24		5.65129	37	0.0359632	0.00307558	2.06628	0.0254198	41.1852	5.74759	0.0320002	0.0236927	3.79805	0.0431569	1.89821	4.39142	0.381347	16.0423	18.1775	10.6344	7.77905	0.698247	0.0140151	-0.0291553	-0.00281909
JP2	1.40283	1	9.98225e-05	0.00649275	0.0102272	0.00639812	0.00151247	2.27394	5.95975e-05	-1.11496e-05	0.00299152	0.000210118	0.00251756	0.00183398	0.00110687	0.00483445	0.0109045	0.00931203	0.00410937	0.00450389	0.000132601	4.30058e-05	-6.63669e-06	0.000139238	25		6.0153	37	-0.00340531	0.00282511	2.32573	0.0347265	31.5991	6.07978	0.0845819	-0.0110303	4.05532	0.143806	3.7548	3.1492	0.494036	13.9958	19.0032	11.6218	7.76375	0.892008	0.0797189	0.0447396	-0.00293738
JP2	1.40977	1	-9.15165e-06	0.00367187	0.0113121	0.00477709	0.0019333	2.25109	0.000166837	6.06681e-05	0.00401312	0.000424017	0.00167642	0.00200165	0.00117155	0.00451663	0.011302	0.00993494	0.00483685	0.00479838	0.000131755	4.27315e-05	2.9279e-05	-5.1436e-06	26		6.04508	37	0.000312196	0.00159769	2.57243	0.0259282	40.3913	6.01867	0.236779	0.0600189	5.44021	0.290201	2.50028	3.43711	0.522907	13.0757	19.696	12.3993	9.13818	0.950332	0.0792104	0.0444543	0.0129588
JP2	1.48166	1	0.000135776	0.00433296	0.010477	0.00594214	0.00197438	2.27345	-4.85306e-05	6.08285e-05	0.00366405	0.000317234	0.00211247	0.00254647	0.000922874	0.00510442	0.0104676	0.00913322	0.00452593	0.00491897	0.000168072	6.87627e-06	-6.61179e-06	3.0811e-05	27		6.35334	37	-0.00463181	0.00188534	2.38252	0.0322516	41.2496	6.07846	-0.0688755	0.0601775	4.967	0.217118	3.15062	4.37263	0.411912	14.7774	18.2418	11.3987	8.55075	0.974215	0.101044	0.0071535	-0.00292636
JP2	1.44994	1	0.000712222	0.00121684	0.0085354	0.00606353	0.00135788	2.20453	0.00016666	-1.10668e-05	0.00322013	0.000280227	0.00228384	0.00250122	0.00120615	0.00422516	0.0111105	0.0097094	0.00572832	0.00522331	5.99451e-05	7.85214e-05	2.92479e-05	3.06971e-05	28		6.21733	37	-0.0242965	0.000529469	1.941	0.0329104	28.3695	5.89421	0.236528	-0.0109483	4.36523	0.19179	3.40622	4.29494	0.538348	12.2319	19.3622	12.1178	10.8224	1.03449	0.0360386	0.0816872	0.0129451
JP2	1.43347	1	0.00163234	0.0338713	0.00962005	0.0055237	0.00138417	2.12399	9.19741e-05	5.86797e-05	0.00277092	0.000375423	0.00189905	0.00186665	0.000855576	0.00586129	0.0110357	0.0101999	0.00519913	0.00564769	0.000196832	4.13309e-05	2.83193e-05	2.97225e-05	29		6.14671	37	-0.0556851	0.014738	2.18766	0.0299804	28.9186	5.67885	0.130531	0.0580517	3.75627	0.256943	2.83233	3.2053	0.381875	16.9685	19.2318	12.7299	9.82263	1.11854	0.118334	0.0429973	0.0125341
JP2	1.43707	1	0.000244847	-0.000551447	0.0102796	0.00559196	0.00136541	2.14557	5.94827e-05	-1.11282e-05	0.00316592	0.000461951	0.00190013	0.00201062	0.000852497	0.00460893	0.011064	0.0107733	0.00529129	0.00654987	9.63116e-05	4.29229e-05	-6.6239e-06	0.00013897	30		6.16214	37	-0.00835263	-0.000239944	2.33764	0.030351	28.5268	5.73655	0.0844189	-0.0110091	4.29174	0.316163	2.83394	3.45251	0.3805	13.343	19.2812	13.4455	9.99674	1.29722	0.0579019	0.0446534	-0.00293172
JP2	1.48895	1	0.00179454	0.00143393	0.00918564	0.00563568	0.00211137	2.223	-4.8373e-05	-1.10718e-05	0.00297062	0.000352055	0.0018188	0.00157021	0.000884027	0.00454972	0.0125155	0.0110775	0.00591016	0.00626571	0.00027508	7.85567e-05	-6.59033e-06	0.000102414	31		6.38461	37	-0.0612182	0.000623928	2.08887	0.0305882	44.1117	5.94358	-0.0686519	-0.0109533	4.02699	0.24095	2.71263	2.69627	0.394573	13.1715	21.8107	13.8253	11.1659	1.24094	0.165377	0.0817239	-0.00291686
JP2	1.50773	1	-0.000293378	-4.36256e-05	0.00994763	0.00609084	0.00197678	2.22441	2.30149e-05	-1.09223e-05	0.00289516	0.000205834	0.00214793	0.00243321	0.000695258	0.00452369	0.0130904	0.010928	0.00667992	0.00681812	0.000129898	4.2129e-05	-6.50139e-06	3.02965e-05	32		6.46515	37	0.0100082	-1.89823e-05	2.26215	0.0330587	41.2997	5.94734	0.0326632	-0.0108054	3.92469	0.140875	3.20351	4.17815	0.310319	13.0962	22.8125	13.6387	12.6203	1.35035	0.0780937	0.0438275	-0.0028775
JP2	1.4872	1	0.000421168	-0.00079581	0.00973252	0.00470735	0.00145647	2.26043	5.87944e-05	-1.09994e-05	0.00305806	0.000349754	0.00209185	0.00241476	0.00112757	0.00555359	0.0125049	0.0132519	0.00676267	0.0076498	5.958e-05	4.24262e-05	-6.54726e-06	6.61273e-05	33		6.3771	37	-0.0143676	-0.000346271	2.21323	0.0255496	30.4291	6.04366	0.083442	-0.0108817	4.14551	0.239375	3.11987	4.14647	0.503275	16.0778	21.7923	16.5389	12.7766	1.51506	0.0358191	0.0441367	-0.0028978
JP2	1.65549	1	0.000739777	-0.000719253	0.0106928	0.00652182	0.0015593	2.32912	6.14432e-05	2.57268e-05	0.00293528	0.00032829	0.00255831	0.00215133	0.00117837	0.00446307	0.0138883	0.0154889	0.00848288	0.00832981	2.50425e-05	0.000118781	3.03795e-05	0.00014355	34		7.09872	37	-0.0252365	-0.00031296	2.43161	0.0353979	32.5777	6.22732	0.0872013	0.0254514	3.97907	0.224685	3.81557	3.69413	0.525949	12.9207	24.2031	19.3308	16.0266	1.64974	0.0150554	0.12357	0.0134459
JP2	1.61907	1	0.000429942	0.000869219	0.00917028	0.00786358	0.00163224	2.23766	2.36601e-05	9.78487e-05	0.00272181	0.000138886	0.00257174	0.0018106	0.000969264	0.00439599	0.0134937	0.0157491	0.0076311	0.00900974	0.000169898	0.000116028	2.96754e-05	3.11458e-05	35		6.94256	37	-0.0146669	0.000378212	2.08537	0.0426804	34.1016	5.98278	0.0335789	0.0968015	3.6897	0.095055	3.8356	3.10905	0.432618	12.7265	23.5154	19.6556	14.4173	1.7844	0.102142	0.120706	0.0131343
JP2	1.51889	1	-0.00115411	0.00203063	0.00996931	0.00594769	0.00177473	2.15786	9.42896e-05	0.000131299	0.00248497	0.000349303	0.00230258	0.00187808	0.000983829	0.00440744	0.0135929	0.0149802	0.00871177	0.0108787	-1.16391e-05	7.79426e-05	6.46034e-05	0.000101613	36		6.51299	37	0.0393708	0.000883562	2.26708	0.0322817	37.0784	5.76941	0.133818	0.129894	3.36864	0.239066	3.43416	3.22491	0.439119	12.7596	23.6883	18.696	16.459	2.15455	-0.00699734	0.081085	0.0285933
JP2	1.45187	1	-0.000420367	0.00129559	0.00945619	0.0059419	0.00136059	2.02751	2.21943e-05	-1.05329e-05	0.00245087	0.000505454	0.00217367	0.00173254	0.00121618	0.00449883	0.0143996	0.0154225	0.00831898	0.0106013	0.000227586	7.47335e-05	-6.26959e-06	2.92163e-05	37		6.2256	37	0.0143402	0.000563733	2.15039	0.0322503	28.4261	5.4209	0.0314986	-0.0104202	3.32241	0.345937	3.2419	2.97501	0.542823	13.0242	25.0941	19.2479	15.7169	2.09962	0.136823	0.0777465	-0.0027749
JP2	1.50791	1	-0.00110531	0.00130016	0.00953742	0.00612572	0.00171914	2.13796	5.80427e-05	-1.08588e-05	0.00291348	0.00027496	0.00290934	0.00189162	0.00104283	0.00470833	0.0148099	0.0176964	0.0099139	0.0109293	5.88183e-05	0.000147369	6.38599e-05	3.01202e-05	38		6.4659	37	0.0377062	0.000565721	2.16886	0.033248	35.917	5.7162	0.0823753	-0.0107426	3.94952	0.188185	4.33911	3.24818	0.465453	13.6307	25.8091	22.0859	18.7302	2.16458	0.0353612	0.15331	0.0282642
JP2	1.53804	1	-0.000829313	0.000313017	0.01001	0.00585873	0.00194666	2.13489	0.000235857	5.99747e-05	0.00297392	0.000241854	0.00250837	0.00169507	0.000519824	0.004465	0.0145106	0.0176347	0.0103539	0.0115199	9.4786e-05	7.77063e-05	2.89443e-05	0.000136768	39		6.5951	37	0.0282909	0.000136199	2.27634	0.0317989	40.6705	5.70801	0.334732	0.0593328	4.03146	0.165527	3.74109	2.91066	0.232016	12.9263	25.2876	22.0088	19.5615	2.28154	0.0569847	0.0808392	0.0128107
JP2	1.63132	1	-0.000680021	-0.000492498	0.0109771	0.0064914	0.00140384	2.29348	6.11565e-05	9.97028e-05	0.00292158	0.00028971	0.00221294	0.00243768	0.000913534	0.00522063	0.0160868	0.0180144	0.0109277	0.0134432	0.00013607	4.41308e-05	0.000104334	0.00014288	40		6.9951	37	0.023198	-0.000214294	2.49626	0.0352327	29.3296	6.13202	0.0867945	0.0986358	3.96051	0.19828	3.30047	4.18583	0.407744	15.1138	28.0343	22.4828	20.6456	2.66247	0.0818043	0.04591	0.0461779
JP2	1.70069	1	-0.00172216	0.000177916	0.0103742	0.00719014	0.00155068	2.31895	2.40874e-05	-1.14313e-05	0.00321516	0.000252442	0.00235907	0.00210241	0.00109782	0.00414187	0.0157022	0.0186665	0.0102512	0.0141355	6.19197e-05	4.40923e-05	-6.80436e-06	0.000142755	41		7.29255	37	0.0587491	7.74145e-05	2.35915	0.0390252	32.3974	6.20013	0.0341853	-0.011309	4.35848	0.172773	3.51842	3.61013	0.489995	11.9908	27.3642	23.2966	19.3674	2.79958	0.0372257	0.0458699	-0.00301159
JP2	1.62536	1	-0.00192292	-0.00188445	0.0105289	0.00708086	0.00161158	2.20241	0.000166955	9.66097e-05	0.00318993	0.000280723	0.00257507	0.00246975	0.000849295	0.00477112	0.0152643	0.0197577	0.0122063	0.0131342	9.59498e-05	7.86604e-05	0.000101097	6.66502e-05	42		6.96953	37	0.0655977	-0.000819956	2.39433	0.0384321	33.6698	5.88853	0.236946	0.0955758	4.32429	0.192129	3.84057	4.2409	0.379071	13.8125	26.601	24.6586	23.0612	2.60127	0.0576844	0.0818317	0.0447453
JP2	1.53146	1	-0.00197721	0.000751825	0.00979501	0.00649748	0.000957352	2.04399	0.000159685	5.80672e-05	0.00243298	0.000405839	0.00222259	0.00219052	0.000949652	0.00346427	0.0149089	0.0192414	0.00974959	0.0127683	9.17715e-05	4.08995e-05	-6.31166e-06	2.94123e-05	43		6.56687	37	0.0674497	0.000327132	2.22744	0.0352657	20.0014	5.46496	0.226628	0.0574458	3.29816	0.27776	3.31486	3.76143	0.423864	10.0291	25.9817	24.0141	18.4197	2.52879	0.0551724	0.0425485	-0.00279352
JP2	1.51405	1	-0.00114037	-0.00144718	0.00829213	0.00645232	0.00146249	2.0377	0.000124478	5.76636e-05	0.00238197	0.000368922	0.00237762	0.00180023	0.000806664	0.00371296	0.0161715	0.0183903	0.0103989	0.0123723	2.29401e-05	6.51849e-06	-6.26778e-06	0.000131498	44		6.49222	37	0.0389021	-0.000629695	1.88568	0.0350206	30.555	5.44814	0.176662	0.0570465	3.22901	0.252493	3.54608	3.09125	0.360043	10.7491	28.182	22.9519	19.6464	2.45037	0.0137914	0.0067813	-0.00277411
JP2	1.52697	1	-0.000181604	-0.00052585	0.0105601	0.00639897	0.00157693	2.07779	0.000228529	5.81112e-05	0.00240046	0.000268701	0.00239608	0.00184857	0.000572395	0.00497948	0.0161249	0.0189117	0.0106858	0.0121247	0.000126202	6.56909e-06	2.8045e-05	2.94346e-05	45		6.54764	37	0.00619517	-0.000228806	2.40143	0.0347311	32.9458	5.55534	0.324332	0.0574893	3.25408	0.183901	3.57361	3.17424	0.255481	14.4157	28.1008	23.6026	20.1884	2.40134	0.075872	0.00683394	0.0124126
JP2	1.62453	1	-0.00022536	-4.42283e-05	0.0107319	0.00660562	0.00143039	2.24155	0.000202614	6.06391e-05	0.00264831	0.000208678	0.00257202	0.00196484	0.000812432	0.00455033	0.0158568	0.0185486	0.0109355	0.0134414	9.58361e-05	-2.90013e-05	2.92649e-05	0.000102427	46		6.96595	37	0.00768784	-1.92445e-05	2.4405	0.0358527	29.8843	5.99316	0.287553	0.0599901	3.59006	0.142821	3.83602	3.3739	0.362618	13.1733	27.6336	23.1494	20.6602	2.6621	0.057616	-0.0301705	0.0129526
JP2	1.59716	1	-0.00147852	-0.00118985	0.00959348	0.00642164	0.00127889	2.23643	0.00013008	2.46274e-05	0.00266732	0.000171737	0.00259151	0.00216629	0.000736071	0.00434361	0.0166139	0.019432	0.0122579	0.0132145	0.000166497	6.81184e-06	-6.54984e-06	3.05223e-05	47		6.84861	37	0.0504376	-0.000517723	2.18161	0.0348541	26.719	5.97949	0.184612	0.0243638	3.61583	0.117538	3.86509	3.71982	0.328535	12.5748	28.9529	24.252	23.1586	2.61717	0.100097	0.00708647	-0.00289894
JP2	1.61146	1	0.00102735	-0.000829114	0.0087802	0.00625882	0.00138138	2.26587	5.86308e-05	6.00672e-05	0.00280092	0.000277745	0.00279674	0.00223045	0.000804769	0.00369014	0.0157783	0.0187295	0.0104054	0.0144167	9.49322e-05	4.23082e-05	2.89889e-05	-5.09265e-06	48		6.90995	37	-0.0350468	-0.000360762	1.99667	0.0339704	28.8604	6.05821	0.0832099	0.0594243	3.79694	0.190091	4.17118	3.82999	0.359198	10.683	27.4967	23.3753	19.6587	2.85527	0.0570726	0.0440139	0.0128304
JP2	1.56827	1	-0.000461041	-0.000703526	0.00928108	0.00706712	0.00148405	2.07434	5.71144e-05	2.39143e-05	0.00283228	0.000305161	0.00241267	0.00172297	0.000956953	0.0039753	0.0148156	0.0198402	0.0112102	0.0127626	9.2477e-05	4.1214e-05	-6.36018e-06	6.42378e-05	49		6.72473	37	0.0157278	-0.000306116	2.11057	0.0383575	31.0054	5.5461	0.0810578	0.0236583	3.83945	0.208855	3.59836	2.95858	0.427123	11.5086	25.819	24.7614	21.1793	2.52768	0.0555966	0.0428756	-0.002815
JP2	1.53331	1	-0.0011555	0.0032233	0.00961375	0.00736811	0.00206922	2.09741	0.000229776	2.38795e-05	0.00282816	0.00020107	0.00209822	0.00185866	0.000644618	0.00386586	0.0148635	0.0173531	0.0106059	0.0142307	2.32444e-05	4.1154e-05	2.81981e-05	-4.95372e-06	50		6.57481	37	0.0394181	0.00140251	2.18622	0.0399912	43.2311	5.6078	0.326103	0.0236239	3.83386	0.137614	3.12937	3.19157	0.287717	11.1917	25.9025	21.6574	20.0375	2.81843	0.0139744	0.0428132	0.0124804
JP2	1.55364	1	-0.00113376	0.00945082	0.00982849	0.0068576	0.001394	2.08943	0.000267347	9.40404e-05	0.00237127	9.85368e-05	0.00250659	0.00296352	0.000966483	0.00439962	0.0147531	0.0196876	0.0111468	0.0140086	5.84541e-05	0.000111512	-6.42352e-06	-5.01035e-06	51		6.66199	37	0.0386767	0.00411222	2.23506	0.0372203	29.124	5.58647	0.379424	0.093034	3.21451	0.0674395	3.73843	5.08877	0.431377	12.737	25.7102	24.571	21.0595	2.77445	0.0351422	0.116008	-0.00284304
JP2	1.56	1	-0.00265228	0.0247397	0.00920813	0.00709909	0.00162185	2.12305	0.000230026	5.8492e-05	0.00286582	0.000235875	0.00234261	0.00189527	0.00064532	0.00348961	0.0150526	0.0183425	0.0100979	0.0122388	9.24428e-05	0.000110372	-6.35783e-06	0.000133387	52		6.68928	37	0.0904787	0.0107647	2.09398	0.038531	33.8843	5.67634	0.326458	0.057866	3.88492	0.161435	3.49386	3.25444	0.28803	10.1025	26.232	22.8922	19.0779	2.42392	0.055576	0.114822	-0.00281396
JP2	1.54736	1	-0.00225842	0.0320343	0.00985582	0.0061751	0.00187167	2.23993	0.000384154	6.09979e-05	0.00327714	0.000137776	0.00204621	0.0028064	0.000781171	0.00396373	0.015481	0.0185137	0.0106027	0.0131241	9.64032e-05	7.90321e-05	-6.63021e-06	0.000139102	53		6.63507	37	0.077043	0.0139387	2.24127	0.033516	39.1038	5.98884	0.545199	0.0603451	4.44251	0.0942949	3.05181	4.81897	0.348665	11.4751	26.9787	23.1059	20.0315	2.59927	0.057957	0.0822184	-0.00293451
JP2	1.58644	1	0.000613848	0.0314624	0.00991502	0.00638128	0.00112472	2.21584	0.000242217	9.80115e-05	0.00371003	0.000139117	0.00257602	0.00192287	0.000497422	0.00440331	0.0149019	0.0189861	0.0113258	0.0141628	6.09224e-05	4.33821e-05	2.97248e-05	0.000104037	54		6.80266	37	-0.0209406	0.0136898	2.25473	0.034635	23.4982	5.92443	0.343759	0.0969626	5.02934	0.0952132	3.84198	3.30184	0.222017	12.7477	25.9695	23.6955	21.3976	2.80498	0.0366262	0.0451312	0.0131561
JP2	1.59883	1	-0.00172311	0.0377119	0.00938094	0.00643394	0.00173579	2.19584	0.000200614	6.00407e-05	0.0029417	0.000171116	0.00233363	0.00251349	0.000484894	0.00404354	0.0144201	0.0197885	0.0104363	0.0126338	5.93881e-05	0.000113294	-6.52617e-06	0.000136919	55		6.85576	37	0.0587816	0.0164091	2.13328	0.0349208	36.265	5.87095	0.284716	0.0593982	3.98778	0.117113	3.48047	4.316	0.216426	11.7061	25.1299	24.6969	19.7172	2.50217	0.0357038	0.117862	-0.00288847
JP2	1.53531	1	-0.00175796	0.0516253	0.00902186	0.00668033	0.00152221	2.11631	0.000448964	0.000130997	0.00354428	0.000135563	0.00144553	0.00240609	0.00069765	0.00421984	0.0151611	0.0181809	0.0117118	0.0135881	0.000201323	7.77631e-05	-6.52375e-06	0.000207847	56		6.5834	37	0.0599704	0.0224631	2.05162	0.0362582	31.8028	5.65831	0.637179	0.129595	4.80464	0.0927808	2.15593	4.13158	0.311386	12.2165	26.4212	22.6906	22.127	2.69115	0.121034	0.0808982	-0.00288739
JP2	1.5314	1	-0.00171618	0.0657467	0.0100119	0.00621887	0.00165722	2.10113	0.000529052	0.000133292	0.00357026	6.57166e-05	0.0019403	0.00273749	0.000854316	0.00454655	0.0148844	0.0188974	0.0118083	0.0145848	2.42952e-05	0.000223569	-6.63804e-06	0.000139266	57		6.56663	37	0.058545	0.0286075	2.27677	0.0337536	34.6233	5.61773	0.750841	0.131865	4.83987	0.044977	2.89384	4.70065	0.381312	13.1624	25.9389	23.5848	22.3093	2.88856	0.0146061	0.232583	-0.00293798
JP2	1.50265	1	-0.00155394	0.0798153	0.00968842	0.00575766	0.00149633	2.14634	0.000987641	0.000238998	0.00331715	0.000243595	0.00191921	0.00188586	0.00038069	0.003961	0.0154023	0.0179766	0.0110006	0.0127822	0.000166905	4.2547e-05	2.91526e-05	6.63155e-05	58		6.44336	37	0.0530104	0.034729	2.2032	0.0312503	31.262	5.73862	1.40168	0.236441	4.49674	0.166718	2.86239	3.23827	0.169916	11.4672	26.8415	22.4356	20.7833	2.53154	0.100342	0.0442623	0.0129028
JP2	1.51797	1	-0.00134472	0.0973309	0.00937526	0.00552901	0.00205831	2.16696	0.000896505	2.41569e-05	0.00422478	0.000203406	0.00187794	0.00215986	0.000652109	0.00492504	0.0150711	0.0197262	0.0108689	0.0113183	0.000268168	4.16322e-05	-6.42471e-06	-5.01128e-06	59		6.50902	37	0.0458734	0.0423504	2.13199	0.0300093	43.0032	5.79375	1.27234	0.0238984	5.72714	0.139213	2.80084	3.70878	0.29106	14.2581	26.2644	24.6192	20.5345	2.24162	0.161221	0.0433106	-0.00284356
JP2	1.55293	1	-0.00230031	0.113659	0.009262	0.00561521	0.00188905	2.19169	0.00145995	5.92795e-05	0.00416698	0.000414312	0.00198857	0.00248162	0.000829268	0.00434315	0.0151501	0.0185544	0.0105848	0.0137716	5.86351e-05	0.000111858	-6.44342e-06	0.000100131	60		6.65896	37	0.0784718	0.0494551	2.10623	0.0304771	39.4668	5.85985	2.07199	0.0586451	5.64878	0.283559	2.96583	4.26128	0.370133	12.5735	26.4019	23.1567	19.9976	2.72751	0.0352511	0.116368	-0.00285184
JP2	1.56673	1	-0.00246154	0.140627	0.00877127	0.00633328	0.00183382	2.18752	0.0012952	0.000165781	0.00388266	0.000170328	0.00211085	0.00246658	0.00055334	0.00462604	0.0140707	0.0182103	0.00929171	0.0138843	0.000165131	0.000148112	-6.49612e-06	3.02719e-05	61		6.71814	37	0.0839719	0.0611891	1.99464	0.0343745	38.313	5.84873	1.83817	0.164007	5.26335	0.116574	3.14821	4.23545	0.246976	13.3925	24.5209	22.7273	17.5547	2.74982	0.0992759	0.154083	-0.00287517
JP2	1.52836	1	-0.000890484	0.144539	0.00838703	0.00698658	0.00129364	2.13915	0.00142542	0.000269692	0.00381752	0.000239139	0.00202437	0.00237734	0.000478923	0.00476553	0.0160337	0.0181394	0.0113962	0.0133556	0.000163852	0.00025216	2.86194e-05	6.51026e-05	62		6.55361	37	0.0303776	0.0628913	1.90726	0.0379204	27.0272	5.71939	2.02299	0.266806	5.17504	0.163669	3.01923	4.08222	0.213761	13.7963	27.9418	22.6388	21.5307	2.64511	0.0985069	0.262326	0.0126669
JP2	1.50671	1	-0.00254575	0.150725	0.00871	0.00636625	0.00191441	2.14469	0.0015506	0.000308735	0.00340555	0.000135692	0.00254811	0.00194657	0.000627266	0.00397483	0.0159229	0.0201558	0.0117585	0.0134944	9.49453e-05	0.000255451	-6.52994e-06	6.59523e-05	63		6.46074	37	0.0868447	0.0655831	1.9807	0.0345535	39.9967	5.7342	2.20064	0.305431	4.61658	0.0928688	3.80036	3.34253	0.279972	11.5072	27.7487	25.1554	22.2151	2.6726	0.0570805	0.26575	-0.00289013
JP2	1.4746	1	0.000131609	0.140359	0.0082344	0.0064229	0.00111156	2.07203	0.000998888	0.00012869	0.00344701	0.000551548	0.00236142	0.0021894	0.000580773	0.00438959	0.0162215	0.0179309	0.0118546	0.0153723	0.000128049	0.000146122	2.84554e-05	9.9594e-05	64		6.32307	37	-0.00448966	0.0610726	1.87255	0.0348609	23.2231	5.53995	1.41764	0.127313	4.67278	0.377485	3.52191	3.7595	0.25922	12.708	28.269	22.3786	22.3967	3.04453	0.0769825	0.152014	0.0125943
JP2	1.47486	1	-0.0027155	0.135082	0.0075005	0.00648119	0.00132503	2.04117	0.00135087	0.000227964	0.00312992	0.000334555	0.0018306	0.00261679	0.000840083	0.00408508	0.0141791	0.018819	0.0108337	0.0140331	0.000125129	-2.7556e-05	2.78065e-05	0.000131392	65		6.32419	37	0.0926354	0.0587763	1.70566	0.0351773	27.6832	5.45744	1.91718	0.225524	4.24293	0.228973	2.73023	4.49338	0.37496	11.8264	24.7098	23.487	20.468	2.77929	0.075227	-0.028667	0.0123071
JP2	1.50518	1	6.06751e-05	0.114163	0.00966958	0.00636787	0.00185276	2.14947	0.000950604	0.000161278	0.00319275	9.69437e-05	0.00170972	0.00229644	0.00084772	0.00439724	0.014308	0.0182668	0.011965	0.013679	5.7509e-05	0.000109709	-6.31967e-06	6.38286e-05	66		6.45418	37	-0.00206985	0.0496741	2.19892	0.0345623	38.7088	5.74699	1.34912	0.159552	4.32811	0.0663491	2.54995	3.9433	0.378368	12.7301	24.9344	22.7977	22.6052	2.70917	0.034574	0.114133	-0.00279707
JP2	1.5382	1	-0.000928334	0.0941618	0.00847975	0.0067585	0.00168377	2.27323	0.000831497	0.000164929	0.00389787	0.000239768	0.00234611	0.00231328	0.000866913	0.00428586	0.0144561	0.0179758	0.0116023	0.0137423	0.000164283	0.000147351	-6.46275e-06	-5.04095e-06	67		6.59579	37	0.0316688	0.0409714	1.92835	0.0366824	35.178	6.07789	1.18008	0.163164	5.28397	0.164099	3.49908	3.97221	0.386935	12.4076	25.1926	22.4346	21.9201	2.7217	0.0987659	0.153291	-0.0028604
JP2	1.59184	1	0.00201937	0.0700523	0.0094762	0.00655996	0.00168808	2.26492	0.000527413	2.48817e-05	0.00453154	0.000317507	0.00269063	0.00265701	0.000563677	0.00374013	0.0162444	0.0195603	0.0115194	0.0134229	6.02191e-05	0.000222877	-6.61748e-06	3.08375e-05	68		6.82578	37	-0.0688879	0.030481	2.15494	0.0356048	35.2682	6.05566	0.748515	0.0246154	6.14298	0.217304	4.01292	4.56246	0.25159	10.8277	28.309	24.4121	21.7634	2.65845	0.0362033	0.231862	-0.00292888
JP2	1.56887	1	-0.00229695	0.0476499	0.00917891	0.00657961	0.00183757	2.25642	0.000709528	0.000133277	0.00487008	0.000282351	0.00204841	0.00212301	0.000709794	0.00454605	0.0150997	0.0177738	0.00978287	0.0127046	0.000132613	0.000151331	-6.63731e-06	0.000103144	69		6.72731	37	0.0783572	0.0207333	2.08734	0.0357115	38.3913	6.03294	1.00698	0.131851	6.6019	0.193244	3.05508	3.6455	0.316807	13.1609	26.3142	22.1825	18.4826	2.51617	0.0797263	0.157432	-0.00293766
JP2	1.5084	1	-0.0030062	0.0320578	0.00870953	0.00555691	0.00181212	2.11869	0.000296379	5.79407e-05	0.00386697	0.000233652	0.00245757	0.00208297	0.000776279	0.00410801	0.0137441	0.017483	0.0102772	0.0126719	0.000125832	0.000314895	-6.2979e-06	6.36088e-05	70		6.46802	37	0.102552	0.0139489	1.9806	0.0301607	37.8597	5.6647	0.420627	0.0573206	5.24208	0.159914	3.66532	3.57674	0.346482	11.8928	23.9518	21.8196	19.4165	2.50971	0.0756494	0.327591	-0.00278744
JP2	1.48206	1	-0.00161903	0.0221154	0.00724289	0.00606255	0.00159701	2.12807	0.000161842	0.000163249	0.00434569	0.000202526	0.00180022	0.00295124	0.000788482	0.00500812	0.0140997	0.0175487	0.00988127	0.0116525	0.000336605	0.000563439	2.84022e-05	2.98096e-05	71		6.35505	37	0.0552311	0.0096228	1.64708	0.0329051	33.3655	5.68978	0.229689	0.161502	5.89104	0.13861	2.68492	5.06768	0.351928	14.4986	24.5715	21.9015	18.6685	2.3078	0.202365	0.586155	0.0125708
JP2	1.59102	1	-0.000696487	0.0166867	0.00752174	0.00644568	0.00175847	2.18928	0.000275167	2.48589e-05	0.00524706	0.000281249	0.0026522	0.00294231	0.00056316	0.00474411	0.0156893	0.0174883	0.0110769	0.0113591	6.01638e-05	0.000222672	2.93547e-05	0.00021064	72		6.8223	37	0.0237597	0.00726067	1.71049	0.0349846	36.7387	5.85343	0.390522	0.0245929	7.11294	0.19249	3.9556	5.05234	0.251359	13.7343	27.3416	21.8262	20.9274	2.24971	0.0361701	0.23165	0.0129923
JP2	1.54145	1	-0.00251943	0.011798	0.00835057	0.00756718	0.00156935	2.1966	5.64492e-05	0.000263011	0.00478371	0.000233215	0.00190582	0.0031053	0.000364468	0.00454488	0.0141294	0.0160797	0.00806699	0.0121007	0.000228186	0.000314305	2.79103e-05	0.000166079	73		6.60972	37	0.0859467	0.00513351	1.89897	0.0410716	32.7876	5.87298	0.0801138	0.260196	6.48482	0.159614	2.84242	5.33223	0.162676	13.1575	24.6232	20.0682	15.2408	2.39658	0.137184	0.326977	0.012353
JP2	1.60901	1	-0.00156738	0.0207724	0.007133	0.00603383	0.001787	2.26682	0.000194592	9.26749e-05	0.00567857	0.000165979	0.00198808	0.00316155	0.000401465	0.0054384	0.0138147	0.0151578	0.00936474	0.0111519	0.000229788	0.000419822	-6.33025e-06	0.000132809	74		6.89944	37	0.0534692	0.00903842	1.62208	0.0327492	37.3347	6.06073	0.276169	0.0916831	7.69789	0.113598	2.96511	5.42881	0.179188	15.7443	24.0748	18.9176	17.6926	2.20867	0.138147	0.436748	-0.00280175
JP2	1.58004	1	-0.00123383	0.0486387	0.00727422	0.00620283	0.00142854	2.25281	0.000453021	0.00031123	0.00540333	0.000172598	0.00188831	0.00296534	0.000489095	0.00490291	0.01372	0.0157984	0.00988143	0.01045	0.000203142	0.000293325	2.92272e-05	6.64853e-05	75		6.7752	37	0.0420905	0.0211635	1.6542	0.0336665	29.8457	6.02327	0.642937	0.307899	7.32478	0.118128	2.81631	5.09189	0.218301	14.194	23.9097	19.7172	18.6688	2.06965	0.122128	0.305151	0.0129359
JP2	1.56087	1	-0.000490367	0.0688377	0.00795453	0.00729549	0.00154165	2.22232	0.000686352	0.000246237	0.00555276	0.000177372	0.00183014	0.00256858	0.000907424	0.00507531	0.0141734	0.0164565	0.00997071	0.0129853	9.83595e-05	0.000154236	-6.76475e-06	6.8324e-05	76		6.693	37	0.0167282	0.0299525	1.80891	0.039597	32.2088	5.94175	0.974083	0.243602	7.52735	0.121395	2.72954	4.4106	0.405016	14.6931	24.6999	20.5385	18.8375	2.57177	0.0591331	0.160455	-0.00299406
JP2	1.48046	1	-0.00110193	0.077078	0.00680448	0.00659841	0.00188914	2.12242	0.000548621	0.00012939	0.00490368	0.000168955	0.00153297	0.00265737	0.00065404	0.00493963	0.0147645	0.0168692	0.0101994	0.0119832	0.000128746	0.000252079	-6.44375e-06	3.00279e-05	77		6.34821	37	0.0375907	0.033538	1.54738	0.0358135	39.4688	5.67467	0.778613	0.128006	6.64745	0.115634	2.28633	4.56306	0.291922	14.3003	25.7301	21.0535	19.2695	2.3733	0.0774013	0.262242	-0.00285199
JP2	1.51386	1	-0.0013856	0.0908239	0.00684926	0.00678496	0.00184447	2.08566	0.000706772	0.000263231	0.00536954	0.000199185	0.00159939	0.00307368	0.000398999	0.00437755	0.014964	0.0160247	0.00988972	0.0127615	0.000194152	0.000519919	2.79337e-05	0.000200443	78		6.4914	37	0.047268	0.039519	1.55756	0.0368261	38.5354	5.57636	1.00306	0.260414	7.27897	0.136324	2.3854	5.27792	0.178088	12.6731	26.0777	19.9995	18.6845	2.52744	0.116723	0.54088	0.0123634
JP2	1.47529	1	-0.000351005	0.0953906	0.00592413	0.00531506	0.00220851	2.11149	0.000838822	0.000159633	0.00697339	0.000436237	0.00189645	0.00278378	0.000192535	0.00462461	0.0139919	0.0163416	0.00904919	0.0121773	0.000193035	0.000414845	0.000368056	0.00122014	79		6.32601	37	0.0119741	0.0415061	1.34718	0.0288481	46.1413	5.64543	1.19047	0.157924	9.45315	0.298565	2.82845	4.78013	0.0859354	13.3883	24.3836	20.395	17.0965	2.41175	0.116052	0.43157	0.162901
JP2	1.48806	1	0.000404028	0.0815497	0.00618789	0.00653406	0.00218339	2.11657	0.000568915	0.000194454	0.0116532	0.000164683	0.00204088	0.00368353	0.000671669	0.00601127	0.0190465	0.0179491	0.0110703	0.0114068	0.000672172	0.000279873	0.00142876	0.00375422	80		6.38077	37	-0.0137829	0.0354837	1.40716	0.0354643	45.6163	5.65903	0.807415	0.192373	15.7971	0.11271	3.04386	6.32513	0.29979	17.4027	33.1922	22.4013	20.915	2.25915	0.404105	0.291156	0.632364
JP2	1.60831	1	0.00459413	0.0891534	0.00536197	0.00790679	0.0023905	2.24444	0.0008808	0.000203352	0.0173392	0.000350875	0.00220574	0.00445953	0.0008096	0.00768095	0.0233562	0.0217783	0.0116841	0.0133945	0.000845857	0.000221218	0.00149414	0.00389029	81		6.89642	37	-0.156722	0.0387922	1.21934	0.0429149	49.9434	6.00089	1.25005	0.201176	23.5052	0.240142	3.28974	7.65762	0.361354	22.2365	40.7027	27.1803	22.0746	2.65282	0.508524	0.230137	0.661303
JP2	1.581	1	0.00145726	0.0885643	0.00543972	0.00772171	0.00216404	2.22782	0.00105375	9.56411e-05	0.016249	0.000242369	0.00251372	0.00390244	0.000911857	0.00721277	0.0224109	0.0206994	0.0122975	0.0138914	0.000699147	0.000255566	0.00329928	0.0045094	82		6.77933	37	-0.0497125	0.0385358	1.23702	0.0419104	45.2121	5.95648	1.4955	0.0946176	22.0272	0.16588	3.74906	6.70101	0.406995	20.8811	39.0553	25.8338	23.2335	2.75122	0.420323	0.265869	1.46026
JP2	1.53829	1	0.00126463	0.071989	0.00534554	0.00809562	0.00277367	2.22458	0.000339254	0.000129757	0.0149109	0.000380352	0.00171307	0.00350856	0.000620738	0.00674748	0.0198779	0.0181498	0.0120583	0.0124744	0.000867327	0.000287946	0.00368533	0.00351098	83		6.59616	37	-0.0431412	0.0313237	1.21561	0.0439398	57.9487	5.9478	0.481476	0.128368	20.2133	0.260316	2.55495	6.02468	0.277058	19.5341	34.641	22.6517	22.7815	2.47059	0.521431	0.299555	1.63112
JP2	1.56757	1	-0.000629094	0.0515519	0.00623777	0.00696822	0.002171	2.17397	0.000494816	0.000170047	0.0167188	0.000355953	0.00169394	0.0038716	0.000712573	0.00732053	0.0204971	0.0188605	0.0105106	0.0134071	0.000459367	4.31781e-05	0.00205985	0.00220631	84		6.72171	37	0.0214607	0.0224311	1.4185	0.0378207	45.3574	5.8125	0.702252	0.168227	22.6641	0.243617	2.52642	6.64807	0.318047	21.1931	35.7202	23.5388	19.8575	2.65532	0.276169	0.0449189	0.911686
JP2	1.49534	1	0.000274311	0.0349584	0.00566838	0.00722317	0.00302335	2.16552	0.000163664	2.43233e-05	0.0132002	0.000239998	0.00167973	0.00337158	0.000410261	0.00643768	0.0190178	0.0169352	0.0102041	0.0125935	0.000516352	0.000253065	0.00157713	0.00133222	85		6.41199	37	-0.00935773	0.015211	1.28902	0.0392045	63.1652	5.78991	0.232276	0.024063	17.8942	0.164257	2.50522	5.78947	0.183114	18.6372	33.1421	21.1359	19.2783	2.49417	0.310427	0.263268	0.698034
JP2	1.54141	1	0.00194258	0.0235512	0.0056054	0.00722855	0.00315757	2.30426	0.000167042	6.07424e-05	0.0144437	0.000137199	0.00218131	0.00397991	0.000310975	0.00574407	0.017035	0.0171051	0.00933603	0.0121705	0.000670676	0.000186453	0.000783577	0.000677278	86		6.60956	37	-0.0662685	0.0102475	1.2747	0.0392337	65.9694	6.16084	0.237069	0.0600924	19.58	0.0939	3.2533	6.83405	0.138799	16.6292	29.6868	21.3479	17.6384	2.41041	0.403206	0.19397	0.346809
JP2	1.54385	1	0.00105694	0.0143747	0.00544695	0.00775638	0.0033951	2.32609	9.68603e-05	0.000134879	0.0143653	0.000176122	0.00148837	0.00306241	0.000243293	0.00679424	0.0208456	0.0171456	0.0101566	0.0127107	0.000865026	0.000153149	0.000687561	0.00076212	87		6.62	37	-0.0360561	0.00625468	1.23867	0.0420986	70.932	6.21919	0.137466	0.133436	19.4737	0.120539	2.21982	5.25858	0.10859	19.6694	36.3276	21.3984	19.1887	2.51739	0.520048	0.159324	0.304313
JP2	1.58999	1	0.000426422	0.00692078	0.00570038	0.00801593	0.00270109	2.30092	0.000239835	0.000205232	0.0143932	0.000209872	0.00168521	0.00327466	0.000312223	0.00623628	0.0192349	0.0177878	0.00969841	0.0130131	0.000601245	0.000115078	0.000678538	0.000788181	88		6.81785	37	-0.0145468	0.00301135	1.2963	0.0435073	56.4323	6.1519	0.340378	0.203036	19.5114	0.143638	2.51339	5.62304	0.139357	18.0542	33.5206	22.2	18.323	2.57728	0.361464	0.119718	0.300319
JP2	1.66824	1	0.00177496	0.010736	0.00592626	0.00725286	0.00275053	2.29482	0.00010001	0.000139264	0.0165702	0.000144119	0.00195178	0.00312426	0.00036439	0.00603381	0.0210318	0.0179298	0.0105246	0.0129354	0.000364945	0.0001204	0.000559	0.000975545	89		7.1534	37	-0.0605502	0.00467144	1.34767	0.0393656	57.4654	6.1356	0.141936	0.137774	22.4626	0.0986365	2.91097	5.36478	0.162641	17.468	36.652	22.3772	19.8839	2.56188	0.219403	0.125254	0.247412
JP2	1.51754	1	-0.000257841	0.0113394	0.00498547	0.00803361	0.00335461	2.18281	0.000235066	2.44292e-05	0.0154522	9.96658e-05	0.00143963	0.00275006	0.000199981	0.00568779	0.0172945	0.0165841	0.0101425	0.0124716	0.000836699	0.0003602	0.000629701	0.0011613	90		6.50721	37	0.00879589	0.00493397	1.13372	0.0436033	70.0861	5.83612	0.33361	0.0241677	20.947	0.0682122	2.14713	4.72224	0.089259	16.4663	30.139	20.6977	19.162	2.47003	0.503018	0.374722	0.278704
JP2	1.46927	1	0.00137539	0.0331875	0.00460967	0.00692101	0.00347063	2.10875	0.000503826	2.3769e-05	0.0171014	0.000268918	0.00150389	0.00298525	0.000607247	0.00639415	0.0185153	0.0158948	0.00931745	0.012444	0.000882866	4.09636e-05	0.000509516	0.00137064	91		6.30021	37	-0.0469196	0.0144404	1.04827	0.0375645	72.51	5.63812	0.71504	0.0235146	23.1827	0.18405	2.24297	5.12608	0.271036	18.5112	32.2664	19.8375	17.6033	2.46457	0.530773	0.0426151	0.22551
JP2	1.42937	1	0.000891313	0.0659606	0.00380914	0.00613392	0.00287819	2.04429	0.000518289	0.000155353	0.0171981	2.71502e-05	0.00148133	0.00300719	0.000617881	0.00522984	0.0178298	0.0160031	0.0100332	0.0116853	0.0006846	0.000238143	0.000391304	0.000889383	92		6.12915	37	-0.0304059	0.0287006	0.866221	0.0332925	60.1323	5.46578	0.735566	0.15369	23.3138	0.0185819	2.20932	5.16375	0.275783	15.1405	31.0718	19.9726	18.9555	2.3143	0.411577	0.247744	0.17319
JP2	1.44989	1	-0.000613563	0.0843966	0.00458103	0.00652654	0.00297211	2.02646	0.000824009	0.000257096	0.0149825	0.000194542	0.00156211	0.00290176	0.00025599	0.00578076	0.0171601	0.0153834	0.00962579	0.0125309	0.000791319	0.000106673	0.000495266	0.000764036	93		6.21712	37	0.0209309	0.0367224	1.04175	0.0354235	62.0945	5.41809	1.16945	0.254344	20.3103	0.133146	2.3298	4.98271	0.114258	16.7354	29.9047	19.1992	18.1858	2.48178	0.475736	0.110973	0.219203
JP2	1.54721	1	0.00144974	0.0942574	0.00527021	0.00644264	0.00328494	2.2324	0.000553336	0.000236568	0.0152798	-6.36915e-06	0.00193505	0.00246772	0.000412175	0.00590168	0.0162728	0.0162353	0.0102163	0.0112726	0.000483406	0.000112825	0.000240988	0.000419194	94		6.63444	37	-0.0494559	0.041013	1.19848	0.0349681	68.6305	5.9687	0.785305	0.234037	20.7134	-0.0043591	2.88602	4.23741	0.183969	17.0855	28.3584	20.2624	19.3015	2.23258	0.29062	0.117374	0.106661
JP2	1.53087	1	0.000235511	0.08315	0.00412573	0.00673256	0.00273476	2.17719	0.000715755	0.000266576	0.0129316	2.84161e-05	0.00186234	0.00370196	0.00054271	0.0049881	0.0165777	0.0148395	0.00845398	0.0101145	0.0006472	0.000214586	0.000201589	0.000480271	95		6.56438	37	-0.00803414	0.03618	0.938215	0.0365417	57.1358	5.82109	1.01581	0.263724	17.5302	0.0194483	2.77757	6.35677	0.242231	14.4406	28.8898	18.5204	15.9719	2.0032	0.389092	0.223238	0.0892227
JP2	1.56697	1	-0.00102117	0.0752808	0.00442153	0.00712443	0.00229648	2.17367	0.000346822	0.000276401	0.0128325	0.00020915	0.00132004	0.00376652	9.55248e-05	0.00484813	0.0157486	0.0124352	0.0076867	0.0101997	0.000599177	0.000114683	6.52687e-05	0.000282346	96		6.71914	37	0.0348356	0.032756	1.00548	0.0386686	47.9792	5.81169	0.492217	0.273443	17.3958	0.143144	1.96876	6.46763	0.0426362	14.0354	27.445	15.5197	14.5223	2.02008	0.360221	0.119306	0.0288877
JP2	1.58036	1	0.00281737	0.0500687	0.00495175	0.00674848	0.00234862	2.11844	0.000514318	9.44744e-05	0.0109535	0.000169202	0.00167563	0.00287188	0.000233734	0.005544	0.0142237	0.0115147	0.00715731	0.00961213	0.000444882	7.69218e-05	9.88626e-05	0.000170493	97		6.77656	37	-0.0961106	0.0217858	1.12606	0.0366281	49.0685	5.66401	0.729929	0.0934634	14.8486	0.115803	2.49911	4.93142	0.104324	16.05	24.7876	14.3709	13.5222	1.90371	0.26746	0.080023	0.0437563
JP2	1.49422	1	0.000706591	0.0321522	0.00487607	0.00711724	0.00256921	2.0292	0.000292817	9.10932e-05	0.00910463	0.000196995	0.00134487	0.00300604	0.000394613	0.00487135	0.0137824	0.00998423	0.00564773	0.00787964	0.000462808	4.03199e-05	-6.22221e-06	0.00019824	98		6.40722	37	-0.0241044	0.01399	1.10885	0.0386296	53.677	5.42543	0.415572	0.0901183	12.3423	0.134825	2.00579	5.16178	0.17613	14.1027	24.0184	12.4608	10.6701	1.56058	0.278237	0.0419455	-0.00275394
JP2	1.45485	1	0.00307604	0.0170389	0.00483823	0.00647924	0.00166523	2.07927	0.000158399	2.35408e-05	0.00902493	2.79234e-05	0.00138728	0.00322906	0.000226768	0.00503784	0.0122648	0.00902343	0.00503534	0.00639523	0.000227269	7.46293e-05	-6.26085e-06	0.000165412	99		6.2384	37	-0.104935	0.00741393	1.10024	0.0351667	34.7906	5.55928	0.224804	0.0232889	12.2342	0.019111	2.06905	5.54474	0.101215	14.5846	21.3738	11.2616	9.51317	1.26659	0.136633	0.0776381	-0.00277104
JP2	1.53065	1	0.00162546	0.0126445	0.0056874	0.00555045	0.00169104	2.27517	0.000199523	5.97141e-05	0.00924993	0.000170185	0.00147351	0.00278264	0.000270401	0.00472808	0.0114071	0.0074815	0.00476079	0.00557034	0.000306229	7.73687e-05	2.88185e-05	0.000100865	100		6.56339	37	-0.0554502	0.00550182	1.29335	0.0301256	35.33	6.08306	0.283167	0.059075	12.5392	0.116476	2.19765	4.77817	0.12069	13.6879	19.8791	9.33724	8.99448	1.10322	0.184103	0.080488	0.012755
JP2	1.53425	1	0.00255924	0.00748606	0.00621041	0.00666358	0.00141014	2.16797	9.14086e-05	-1.06495e-05	0.00761892	9.72405e-05	0.00164599	0.00230347	0.000367536	0.0042038	0.00989746	0.00699634	0.00406333	0.00471603	0.000230106	4.10768e-05	-6.33901e-06	6.4024e-05	101		6.57886	37	-0.0873051	0.00325731	1.41228	0.0361673	29.4613	5.79645	0.129729	-0.0105356	10.3282	0.0665522	2.4549	3.95537	0.164045	12.1701	17.2482	8.73174	7.67677	0.934023	0.138338	0.0427329	-0.00280563
JP2	1.59114	1	0.00171137	0.00522288	0.00534534	0.00688312	0.00117128	2.30349	9.44201e-05	-1.10004e-05	0.00797679	0.000136064	0.00137963	0.00280716	0.000308404	0.00423544	0.0105089	0.00640686	0.00401874	0.00465768	0.000273307	4.24301e-05	0.000135933	0.000244235	102		6.82281	37	-0.0583812	0.00227257	1.21556	0.0373588	24.4709	6.15877	0.134003	-0.0108827	10.8134	0.0931237	2.05764	4.82028	0.137652	12.2617	18.3137	7.99604	7.59253	0.922466	0.164311	0.0441407	0.0601638
JP2	1.65473	1	0.0020446	0.0024106	0.00576164	0.00613091	0.00130824	2.22947	0.000133065	2.51926e-05	0.0089285	0.000175678	0.00155752	0.00287246	0.000169782	0.0041878	0.00958585	0.00520655	0.00374773	0.00400023	0.000352563	4.34171e-05	2.97488e-05	0.000104121	103		7.09547	37	-0.0697487	0.0010489	1.31023	0.0332762	27.3323	5.96087	0.188849	0.024923	12.1035	0.120236	2.32295	4.9324	0.07578	12.1238	16.7052	6.49801	7.08052	0.792257	0.211958	0.0451675	0.0131667
JP2	1.51855	1	0.00154726	-0.000871259	0.00543213	0.00560813	0.000786339	2.13791	0.000125455	5.81163e-05	0.00652613	0.000165632	0.00109044	0.00281128	0.000228801	0.00436102	0.00838403	0.00573388	0.00250213	0.00356528	0.000298036	7.52986e-05	-6.31699e-06	0.000201259	104		6.51152	37	-0.0527825	-0.0003791	1.2353	0.0304387	16.4285	5.71607	0.178049	0.0574944	8.84685	0.11336	1.62633	4.82735	0.102122	12.6252	14.6108	7.15614	4.72722	0.706113	0.179177	0.0783344	-0.00279589
JP2	1.54116	1	0.00260391	0.00065341	0.00554097	0.00620354	0.00127703	2.22106	2.25252e-05	2.39251e-05	0.0069202	9.76092e-05	0.00151377	0.00297024	0.000438159	0.00466973	0.00872242	0.00536031	0.00307421	0.00317589	0.000300209	4.12326e-05	6.28669e-05	0.000133497	105		6.60848	37	-0.0888287	0.00028431	1.26005	0.0336704	26.6802	5.9384	0.0319682	0.023669	9.38106	0.0668046	2.2577	5.1003	0.195567	13.519	15.2005	6.6899	5.80804	0.628994	0.180483	0.0428949	0.0278247
JP2	1.53103	1	0.000903721	0.00300915	0.00561926	0.0055886	0.000798277	2.09627	2.27016e-05	-1.07737e-05	0.00686975	9.83737e-05	0.00173494	0.0027493	0.000336933	0.00369427	0.00854619	0.00522752	0.002575	0.00246781	0.000232788	4.15555e-05	6.33594e-05	9.96563e-05	106		6.56504	37	-0.0308292	0.00130934	1.27785	0.0303327	16.6779	5.60475	0.0322186	-0.0106584	9.31266	0.0673278	2.58757	4.72092	0.150386	10.695	14.8934	6.52417	4.86489	0.488756	0.139951	0.0432309	0.0280427
JP2	1.58033	1	0.00173549	0.000427562	0.00621608	0.00538892	0.00107942	2.31023	2.3506e-05	2.49669e-05	0.00678771	0.00010186	0.00168805	0.00309957	0.000168261	0.00396966	0.00863228	0.00624428	0.00252175	0.00288071	0.00045777	6.90573e-06	-6.64012e-06	0.000247677	107		6.77642	37	-0.0592039	0.000186039	1.41357	0.0292489	22.5517	6.17679	0.0333602	0.0246997	9.20145	0.0697136	2.51763	5.32239	0.0751009	11.4922	15.0434	7.79314	4.7643	0.570534	0.275208	0.00718415	-0.0029389
JP2	1.66438	1	0.00400736	0.000920368	0.00665501	0.00547589	0.000808617	2.35445	-4.98593e-05	-1.14119e-05	0.00668513	6.72489e-05	0.00228116	0.00294913	0.000393848	0.00365446	0.00735119	0.00472388	0.00261669	0.00231839	0.00013572	8.09704e-05	3.01601e-05	3.16545e-05	108		7.13683	37	-0.136705	0.000400468	1.51339	0.029721	16.894	6.29502	-0.0707612	-0.0112898	9.06239	0.0460257	3.40222	5.06406	0.175789	10.5797	12.8109	5.89562	4.94367	0.459163	0.0815943	0.0842348	0.0133488
JP2	1.62031	1	0.00379674	-0.0019265	0.00673832	0.00533671	0.000607996	2.36513	9.54628e-05	-1.11219e-05	0.00568618	0.000209594	0.00157494	0.00200948	0.000455865	0.00359759	0.00637169	0.00402724	0.00222606	0.00207939	0.000168285	4.28987e-05	-6.62016e-06	6.68637e-05	109		6.94786	37	-0.129521	-0.000838253	1.53233	0.0289655	12.7025	6.32359	0.135483	-0.0110028	7.7082	0.143448	2.34893	3.45056	0.203469	10.4151	11.1039	5.02617	4.20565	0.41183	0.101172	0.0446282	-0.00293007
JP2	1.63303	1	0.000808082	-0.00190099	0.00713059	0.00576739	0.000844912	2.31147	-1.28963e-05	-1.14031e-05	0.00505415	0.000473363	0.0018363	0.00194952	0.000319693	0.00372546	0.00616316	0.00368596	0.00220849	0.0017258	6.17665e-05	4.39832e-05	-6.78753e-06	0.000142402	110		7.00243	37	-0.0275666	-0.000827152	1.62154	0.0313031	17.6523	6.18012	-0.0183027	-0.011281	6.85143	0.323974	2.73873	3.34758	0.142691	10.7853	10.7405	4.60024	4.17246	0.341799	0.0371336	0.0457565	-0.00300415
JP2	1.45581	1	0.000937179	-0.00133791	0.00536453	0.00383528	0.000657485	2.15553	-1.21614e-05	-1.07533e-05	0.00396494	0.000133008	0.00190576	0.00187324	0.000545216	0.00299052	0.00560304	0.00319736	0.00142071	0.00162746	0.000162707	6.65678e-06	-6.40075e-06	2.98275e-05	111		6.24249	37	-0.0319706	-0.000582147	1.21993	0.0208164	13.7365	5.76317	-0.0172597	-0.0106382	5.37489	0.0910316	2.84233	3.21662	0.24335	8.65762	9.76438	3.99045	2.68412	0.322322	0.0978184	0.00692516	-0.00283296
JP2	1.52507	1	-0.000922562	2.71302e-05	0.00671223	0.00402304	0.000519971	2.19937	-1.22029e-05	2.41488e-05	0.00408327	0.000133461	0.0017725	0.00107604	0.000512135	0.00324564	0.00499289	0.00373234	0.00132074	0.00173782	0.0001982	4.16182e-05	9.83937e-05	2.99292e-05	112		6.53949	37	0.0314719	1.18048e-05	1.5264	0.0218355	10.8635	5.8804	-0.0173185	0.0238904	5.53529	0.0913418	2.64358	1.8477	0.228585	9.39618	8.70107	4.65812	2.49524	0.34418	0.119157	0.0432961	0.0435488
JP2	1.54713	1	0.00167079	-0.000793523	0.00714287	0.00401833	0.000528543	2.23478	-4.79188e-05	-1.09678e-05	0.00422196	0.000313235	0.00134003	0.00173304	0.000378519	0.00248195	0.00560827	0.00407798	0.0018042	0.0018375	0.000165953	-2.87251e-05	-6.52844e-06	0.000101452	113		6.63406	37	-0.0569966	-0.000345276	1.62433	0.0218099	11.0425	5.97508	-0.0680072	-0.0108504	5.72331	0.214381	1.99857	2.97587	0.168947	7.18528	9.7735	5.08951	3.40864	0.363921	0.0997698	-0.0298832	-0.00288947
JP2	1.56329	1	0.000352242	-0.00217467	0.00772909	0.00352554	0.000570576	2.2954	5.93029e-05	2.48306e-05	0.00308451	0.000209079	0.00142736	0.00168122	0.000526594	0.00301358	0.00473831	0.00405326	0.00236429	0.00218206	0.000203796	4.27932e-05	2.93213e-05	3.07741e-05	114		6.70337	37	-0.0120163	-0.000946238	1.75764	0.0191352	11.9207	6.13716	0.0841638	0.0245649	4.18137	0.143096	2.12883	2.88688	0.235038	8.72438	8.25743	5.05865	4.4668	0.432162	0.122521	0.0445185	0.0129775
JP2	1.61052	1	0.00212822	0.000715942	0.00763749	0.00392939	0.0010038	2.35602	-1.2574e-05	-1.11181e-05	0.00373944	0.000245524	0.00211442	0.00182879	0.000527712	0.00359636	0.00662152	0.00427823	0.0021533	0.0024747	2.42215e-05	7.88854e-05	-6.6179e-06	6.68408e-05	115		6.90591	37	-0.0726012	0.000311519	1.73681	0.0213272	20.9719	6.29922	-0.0178453	-0.0109991	5.0692	0.168039	3.15353	3.14028	0.235537	10.4115	11.5393	5.33942	4.06818	0.490121	0.0145618	0.0820658	-0.00292907
JP2	1.47001	1	0.000292314	-0.0017092	0.0078079	0.00325801	0.000726474	2.11426	8.80019e-05	-1.02527e-05	0.00321597	0.00032601	0.00171744	0.00188563	0.000387038	0.0029509	0.00670435	0.00454313	0.00205208	0.00221567	8.87343e-05	7.2745e-05	6.02954e-05	9.48371e-05	116		6.30341	37	-0.0099719	-0.000743704	1.77556	0.0176832	15.1778	5.65284	0.124894	-0.0101429	4.35958	0.223124	2.56146	3.23789	0.172749	8.54291	11.6836	5.67003	3.87696	0.43882	0.0533465	0.0756779	0.0266866
JP2	1.65362	1	0.00195017	0.00117384	0.00643363	0.00401043	0.000804041	2.33227	-1.28333e-05	2.53965e-05	0.0041105	0.000250587	0.00157012	0.00197674	0.000685569	0.00333983	0.00664784	0.00576346	0.00341061	0.003114	6.14648e-05	7.02455e-06	6.67333e-05	0.000104963	117		7.0907	37	-0.0665275	0.000510756	1.46305	0.021767	16.7984	6.23573	-0.0182133	0.0251247	5.57222	0.171504	2.34175	3.39433	0.305995	9.66887	11.5851	7.19305	6.44361	0.616736	0.0369523	0.00730776	0.029536
JP2	1.56504	1	-0.00138478	-0.000231141	0.00791518	0.0029616	0.00117843	2.26626	2.40524e-05	-1.14147e-05	0.00391313	0.000104227	0.00165337	0.0022472	0.000652677	0.00347054	0.00790815	0.00672209	0.00261733	0.00316945	0.000209677	7.06625e-06	-6.79447e-06	6.86242e-05	118		6.71087	37	0.04724	-0.000100573	1.79996	0.0160744	24.6203	6.05923	0.0341357	-0.0112926	5.30466	0.071334	2.4659	3.85876	0.291314	10.0473	13.7815	8.38946	4.94487	0.627718	0.126057	0.00735114	-0.00300722
JP2	1.51046	1	0.000665388	0.000524008	0.00702336	0.00332028	0.00084236	2.09868	2.29522e-05	-1.08926e-05	0.00429883	9.94597e-05	0.00182464	0.0020386	0.000587552	0.00334706	0.00842891	0.00588519	0.00249761	0.0029892	9.42728e-05	0.000112557	2.87876e-05	0.000171299	119		6.47686	37	-0.0226988	0.000228005	1.59715	0.0180212	17.599	5.61118	0.0325743	-0.010776	5.82752	0.0680711	2.72134	3.50056	0.262246	9.68982	14.689	7.34498	4.71869	0.59202	0.0566762	0.117095	0.0127413
JP2	1.52256	1	0.00393901	0.000934341	0.00715545	0.00333711	0.000933156	2.18947	5.73013e-05	2.39925e-05	0.00360557	0.000236735	0.00203873	0.00155505	0.000439395	0.00388416	0.00805207	0.00739014	0.00398575	0.00318484	0.000266342	4.13488e-05	2.83316e-05	6.4448e-05	120		6.52875	37	-0.134374	0.000406548	1.62719	0.0181125	19.4959	5.85393	0.081323	0.0237357	4.88773	0.162023	3.04064	2.67023	0.196118	11.2447	14.0323	9.22322	7.5302	0.630767	0.160123	0.0430159	0.0125395
JP2	1.46677	1	-0.000108849	0.000327586	0.00787366	0.00390561	0.000996186	2.14196	-4.49804e-05	2.30417e-05	0.00506352	0.000194016	0.00242465	0.00246053	0.000288634	0.00346354	0.00940148	0.00696359	0.00262733	0.00349201	8.91028e-05	3.97102e-05	-6.12811e-06	0.000128568	121		6.28948	37	0.00371323	0.000142538	1.79052	0.0211981	20.8128	5.72691	-0.063837	0.0227951	6.86413	0.132786	3.61622	4.22506	0.128828	10.027	16.3839	8.69087	4.96377	0.691602	0.053568	0.0413112	-0.00271229
JP2	1.6084	1	-0.000514269	0.00107397	0.00814947	0.00434643	0.00143113	2.27582	9.50945e-05	-1.1079e-05	0.00483876	0.000280536	0.00146124	0.00243223	0.000669355	0.00480381	0.0102966	0.00806842	0.00390395	0.00390135	0.00027526	0.000114483	0.00010103	-5.14381e-06	122		6.89681	37	0.0175436	0.000467301	1.85324	0.0235907	29.8998	6.08481	0.13496	-0.0109604	6.55945	0.192001	2.17935	4.17647	0.298757	13.9071	17.9438	10.0698	7.37565	0.772672	0.165484	0.119098	0.0447155
JP2	1.61569	1	0.00128889	0.00553194	0.0081982	0.00499091	0.00159974	2.21655	0.000196977	-1.07652e-05	0.00470171	0.000307448	0.00246561	0.00197989	0.000754971	0.00473746	0.00805109	0.00742123	0.00295641	0.00309367	0.000128029	4.15228e-05	-6.40784e-06	0.000134436	123		6.92809	37	-0.0439689	0.00240704	1.86432	0.0270887	33.4226	5.92634	0.279553	-0.01065	6.37365	0.21042	3.67731	3.39975	0.336971	13.715	14.0306	9.26203	5.5855	0.61271	0.0769699	0.0431969	-0.00283609
JP2	1.59156	1	0.000495834	0.00543528	0.00814143	0.00552592	0.000999287	2.19447	0.000202519	9.64502e-05	0.00443976	0.000316098	0.00249914	0.00196392	0.000597016	0.00415397	0.0101072	0.00766588	0.00379258	0.00328823	0.000274988	0.00011437	-6.58813e-06	3.07007e-05	124		6.82458	37	-0.0169147	0.00236498	1.85141	0.0299925	20.8775	5.86729	0.287419	0.095418	6.01856	0.21634	3.72732	3.37232	0.26647	12.0258	17.6138	9.56736	7.16525	0.651243	0.165321	0.118981	-0.00291589
JP2	1.60321	1	-0.000184842	0.010269	0.00727932	0.00549778	0.00101014	2.1236	0.000127681	0.00016407	0.00394751	0.000308467	0.00278889	0.00202143	0.00047768	0.00412363	0.00835791	0.00772562	0.00405111	0.00460816	9.34787e-05	0.000146583	-6.42907e-06	2.99595e-05	125		6.87456	37	0.00630564	0.00446821	1.65536	0.0298398	21.1042	5.67782	0.181208	0.162314	5.35126	0.211117	4.15947	3.47107	0.213206	11.938	14.5653	9.64192	7.65368	0.912658	0.0561988	0.152493	-0.00284549
JP2	1.53577	1	0.00032408	0.0121362	0.00724367	0.00562578	0.00171519	2.00621	0.000120667	0.000155057	0.00379676	0.000225416	0.00240399	0.00234007	0.000781967	0.00363234	0.0086927	0.00816125	0.00260494	0.00382583	0.000154449	0.000105477	-6.07589e-06	0.000127472	126		6.58537	37	-0.0110555	0.00528068	1.64725	0.0305345	35.8345	5.36395	0.171253	0.153397	5.1469	0.154276	3.58541	4.01822	0.349021	10.5157	15.1487	10.1856	4.92147	0.757717	0.0928538	0.10973	-0.00268917
JP2	1.53304	1	-0.00120317	0.0129389	0.00723304	0.00489259	0.00152342	2.11309	5.60176e-05	0.00019313	0.00399989	0.000502911	0.00209486	0.00216497	0.000802836	0.00437438	0.00895862	0.00834512	0.00348924	0.005116	0.000192506	0.000108292	2.76969e-05	6.30042e-05	127		6.57366	37	0.0410444	0.00562995	1.64483	0.026555	31.8279	5.64972	0.0795012	0.191063	5.42226	0.344197	3.12436	3.71756	0.358335	12.6639	15.6121	10.4151	6.59216	1.01324	0.115733	0.112658	0.0122586
JP2	1.59643	1	-0.000609324	0.0213554	0.00874937	0.00597579	0.00140059	2.20085	0.000198393	0.000164704	0.00459507	0.000309658	0.00192158	0.00245055	0.000830617	0.00459597	0.00926862	0.0101102	0.00508527	0.00610089	0.000128949	0.00011204	-6.4539e-06	0.000100294	128		6.84549	37	0.0207863	0.00929211	1.98966	0.0324342	29.2617	5.88436	0.281563	0.162941	6.2291	0.211933	2.86593	4.20792	0.370735	13.3054	16.1524	12.618	9.60751	1.2083	0.0775233	0.116557	-0.00285648
JP2	1.70831	1	0.00230987	0.02074	0.00825262	0.00623754	0.00161658	2.33897	0.000275505	0.000384992	0.00442491	0.000281595	0.002331	0.00208131	0.000743903	0.00424579	0.0108043	0.0119199	0.00503573	0.00744616	9.6248e-05	7.89048e-05	-6.61953e-06	3.0847e-05	129		7.32523	37	-0.0787981	0.00902432	1.87669	0.0338549	33.7744	6.25364	0.391002	0.380872	5.99843	0.192726	3.47655	3.5739	0.332031	12.2916	18.8286	14.8766	9.5139	1.47473	0.0578636	0.082086	-0.00292979
JP2	1.63648	1	-0.00127303	0.0251482	0.00775593	0.00538274	0.00149741	2.21935	0.000406737	0.000268505	0.00359125	0.000238087	0.00313295	0.00240179	0.0010703	0.00460491	0.00900643	0.0111713	0.00746712	0.00767301	0.000302774	4.15849e-05	6.34042e-05	-5.00559e-06	130		7.01719	37	0.0434275	0.0109424	1.76374	0.0292154	31.2845	5.93381	0.577248	0.265632	4.86831	0.162949	4.67262	4.1242	0.477713	13.3313	15.6955	13.9423	14.1075	1.51966	0.182026	0.0432615	0.0280625
JP2	1.65823	1	0.000375428	0.0285147	0.00892929	0.00722974	0.00159311	2.15386	0.00019616	0.000128136	0.00457806	0.000271459	0.00235124	0.00287459	0.000647697	0.0050653	0.012014	0.0134373	0.0072164	0.00877567	0.000127497	0.000110779	-6.38126e-06	6.44507e-05	131		7.11046	37	-0.0128072	0.0124072	2.03057	0.0392401	33.2839	5.75871	0.278394	0.126764	6.20604	0.185789	3.50673	4.93607	0.289091	14.6641	20.9367	16.7703	13.6338	1.73805	0.0766507	0.115245	-0.00282433
JP2	1.59986	1	0.00132391	0.0490897	0.00897326	0.0057801	0.00169432	2.08565	0.000463572	0.00015931	0.00434272	0.000367437	0.0029457	0.00267627	0.000531741	0.00376594	0.011073	0.0145739	0.00889506	0.0101138	0.000124726	0.000278168	2.77169e-05	6.30498e-05	132		6.8602	37	-0.0451633	0.0213598	2.04057	0.0313721	35.3985	5.57636	0.65791	0.157605	5.887	0.251477	4.39334	4.59553	0.237335	10.9025	19.2968	18.1889	16.8053	2.00306	0.0749846	0.289383	0.0122674
JP2	1.56953	1	-0.000829068	0.0615991	0.0085032	0.00646516	0.00162762	2.07905	0.000565875	0.000329355	0.00427801	0.000129818	0.00271002	0.0018623	0.00087199	0.00373478	0.0126127	0.0138018	0.00978637	0.0124001	5.68499e-05	0.000210407	6.17228e-05	0.000131067	133		6.73013	37	0.0282825	0.0268028	1.93368	0.0350903	34.005	5.5587	0.803101	0.32583	5.79929	0.0888484	4.04184	3.19783	0.389201	10.8123	21.98	17.2253	18.4892	2.45587	0.0341778	0.21889	0.0273183
JP2	1.69039	1	-0.00238931	0.0821378	0.00850464	0.00617508	0.00196826	2.22989	0.00081218	0.00027578	0.00537453	0.000316251	0.00242863	0.00257443	0.000489734	0.00411975	0.0120863	0.0145261	0.0105763	0.013334	5.99808e-05	0.000329565	2.92654e-05	0.000174142	134		7.24838	37	0.0815081	0.0357396	1.934	0.0335159	41.1217	5.96199	1.15266	0.272829	7.28574	0.216445	3.62216	4.42065	0.218586	11.9268	21.0628	18.1292	19.9817	2.64083	0.0360601	0.342852	0.0129528
JP2	1.68931	1	-0.00200519	0.0927936	0.00711237	0.00693599	0.00140326	2.28719	0.00060077	0.000277503	0.00598576	0.000209984	0.00222732	0.00295168	0.000925761	0.00385684	0.0141853	0.0159179	0.0111483	0.0142118	0.000168598	0.00015122	-6.63248e-06	0.000211311	135		7.24374	37	0.0684042	0.0403761	1.6174	0.0376458	29.3176	6.11521	0.852623	0.274533	8.11432	0.143715	3.32191	5.06844	0.413201	11.1656	24.7206	19.8662	21.0622	2.81468	0.10136	0.157317	-0.00293552
JP2	1.72106	1	-0.00166508	0.104435	0.00848853	0.00666478	0.0020719	2.22334	0.000953797	0.000167891	0.00514962	2.93415e-05	0.00288964	0.00285622	0.000882483	0.00472072	0.0124936	0.0168284	0.0105925	0.0148129	0.000346177	0.00036473	-6.57882e-06	3.06573e-05	136		7.37991	37	0.0568018	0.0454415	1.93034	0.0361738	43.287	5.9445	1.35365	0.166095	6.98085	0.0200816	4.30973	4.90453	0.393884	13.6666	21.7726	21.0026	20.0121	2.93374	0.20812	0.379434	-0.00291177
JP2	1.73799	1	0.000317975	0.110793	0.00896352	0.0065808	0.00158511	2.24366	0.000673543	0.000277755	0.00667772	0.000246289	0.00251825	0.00309882	0.000854376	0.00342699	0.0139089	0.0134727	0.0100013	0.0138993	0.000168751	0.000223585	2.9475e-05	0.000211503	137		7.4525	37	-0.0108473	0.048208	2.03836	0.035718	33.1167	5.9988	0.955905	0.274783	9.05234	0.168562	3.75582	5.32109	0.381339	9.9212	24.2389	16.8145	18.8953	2.7528	0.101452	0.232599	0.0130455
JP2	1.66803	1	-0.00115018	0.114439	0.00716533	0.00663753	0.00152054	2.24143	0.00112202	0.000308103	0.0062002	0.000170864	0.00268505	0.0027583	0.000767782	0.00432155	0.0130497	0.0141483	0.0102437	0.0137504	0.000130201	0.000148578	-6.51657e-06	0.000136718	138		7.15248	37	0.0392369	0.0497945	1.62944	0.0360259	31.7678	5.99285	1.5924	0.304806	8.40502	0.116941	4.0046	4.73637	0.342689	12.511	22.7416	17.6577	19.3533	2.7233	0.078276	0.154568	-0.00288422
JP2	1.69551	1	-0.00157554	0.127944	0.00825467	0.00698275	0.00187246	2.18014	0.00104967	0.000272277	0.00640442	9.98264e-05	0.00204377	0.00243553	0.000872928	0.00406743	0.0115077	0.0127461	0.00994604	0.0124563	0.000236225	0.000289978	2.88937e-05	6.57266e-05	139		7.27032	37	0.0537473	0.0556708	1.87716	0.0378996	39.1202	5.82898	1.48972	0.269364	8.68186	0.0683221	3.04817	4.18214	0.38962	11.7753	20.0544	15.9077	18.7909	2.467	0.142017	0.301669	0.0127883
JP2	1.56248	1	-0.00246548	0.126577	0.00750363	0.00621673	0.00128566	2.01788	0.000802455	0.000125239	0.00552707	0.000265323	0.00209452	0.00240212	0.000599128	0.00332152	0.0120485	0.0117065	0.00820791	0.0112591	0.000294262	0.000447568	2.76924e-05	6.29939e-05	140		6.69992	37	0.0841065	0.0550759	1.70637	0.0337419	26.8607	5.39515	1.13886	0.123899	7.49252	0.181589	3.12385	4.12478	0.267413	9.61585	20.9968	14.6102	15.507	2.22989	0.176909	0.465613	0.0122566
JP2	1.63398	1	-4.45417e-05	0.132393	0.00784838	0.0055786	0.000883032	2.21983	0.00119421	0.000130994	0.00592297	0.000313001	0.00297185	0.002477	0.000875073	0.00372254	0.0129218	0.0114271	0.00858502	0.0121671	0.000272294	0.000148738	6.4453e-05	3.03999e-05	141		7.00651	37	0.00151948	0.0576064	1.78477	0.0302784	18.4487	5.9351	1.69484	0.129592	8.0292	0.214221	4.43234	4.25335	0.390577	10.7768	22.5187	14.2615	16.2195	2.40973	0.163702	0.154734	0.0285267
JP2	1.64532	1	0.00121522	0.132384	0.00768634	0.00626384	0.00100382	2.14745	0.000717728	0.000232556	0.00607872	0.000132761	0.00249307	0.00207831	0.00050945	0.00312435	0.0109846	0.00993853	0.00708601	0.0108378	0.000370939	4.14e-05	-6.38889e-06	2.97722e-05	142		7.0551	37	-0.0414557	0.0576028	1.74792	0.0339976	20.9723	5.74158	1.01861	0.230067	8.24034	0.0908629	3.71827	3.56874	0.227386	9.04506	19.1429	12.4037	13.3875	2.14645	0.223006	0.0430691	-0.00282771
JP2	1.63057	1	0.00262447	0.130227	0.00757614	0.00621763	0.000833214	2.14571	0.00103446	5.90022e-05	0.00603216	0.000482151	0.00215371	0.00212113	0.000650948	0.00320606	0.0120045	0.00994159	0.00767163	0.0100764	0.000197914	0.000215999	-6.41329e-06	0.000169439	143		6.99186	37	-0.0895301	0.0566639	1.72286	0.0337468	17.4079	5.73693	1.46813	0.0583708	8.17722	0.329988	3.21213	3.64227	0.290542	9.2816	20.9202	12.4076	14.4939	1.99566	0.118985	0.224708	-0.0028385
JP2	1.71398	1	-9.34671e-06	0.138911	0.00755233	0.00641954	0.00120474	2.25633	0.000683324	0.000135237	0.00571146	0.000396417	0.00259146	0.00197104	0.000537042	0.00296346	0.0119829	0.00941321	0.00790982	0.011608	0.000281115	0.000116918	-6.73491e-06	3.13847e-05	144		7.34954	37	0.00031885	0.0604428	1.71744	0.0348427	25.17	6.03269	0.969787	0.13379	7.74248	0.271311	3.86501	3.38455	0.239701	8.57927	20.8826	11.7481	14.9439	2.29899	0.169005	0.121632	-0.00298086
JP2	1.65369	1	0.000689155	0.140599	0.00728668	0.00600619	0.0013139	2.10331	0.0012015	0.000301363	0.00453819	0.000236476	0.00238324	0.00186542	0.000716312	0.00294336	0.0109591	0.0105402	0.00897835	0.0104311	0.000162027	0.000180002	-6.37401e-06	2.97029e-05	145		7.09102	37	-0.0235096	0.061177	1.65703	0.0325992	27.4507	5.62357	1.70519	0.298138	6.15199	0.161846	3.55447	3.20318	0.319716	8.52107	19.0983	13.1547	16.9626	2.06592	0.0974098	0.187259	-0.00282112
JP2	1.62729	1	-0.00224711	0.13528	0.00709803	0.0062667	0.00145666	2.03694	0.000961455	0.000128347	0.00486415	0.00034145	0.00287704	0.00180108	0.000683539	0.00260386	0.0104674	0.00928171	0.00900341	0.0125823	0.000127708	0.000250047	-6.3918e-06	6.45572e-05	146		6.97783	37	0.0766569	0.0588627	1.61413	0.0340131	30.4331	5.4461	1.36451	0.126974	6.59386	0.233691	4.29094	3.0927	0.305089	7.53821	18.2414	11.584	17.01	2.49197	0.0767773	0.260128	-0.002829
JP2	1.55723	1	-8.59283e-06	0.118576	0.00748311	0.00596912	0.00131	2.02334	0.00076294	5.69636e-05	0.00454311	0.000196029	0.00255119	0.00160996	0.00042636	0.00242129	0.0101397	0.0109471	0.00915975	0.0136041	9.00272e-05	7.3805e-05	6.11739e-05	0.00023095	147		6.67738	37	0.000293133	0.0515944	1.7017	0.032398	27.3692	5.40974	1.08278	0.0563539	6.15866	0.134164	3.80495	2.76453	0.1903	7.00968	17.6703	13.6624	17.3053	2.69433	0.0541238	0.0767805	0.0270754
JP2	1.54238	1	-0.000487509	0.106429	0.00772542	0.00582237	0.00142468	2.07284	0.000668283	0.00012553	0.00472301	0.000435978	0.00250781	0.00227166	0.000668533	0.00278475	0.0109524	0.0111548	0.00972465	0.0129189	0.000124905	0.000142534	6.17646e-05	0.000301196	148		6.61369	37	0.0166307	0.0463093	1.7568	0.0316015	29.765	5.54211	0.94844	0.124186	6.40254	0.298387	3.74025	3.90076	0.298391	8.0619	19.0867	13.9217	18.3726	2.55863	0.0750918	0.14828	0.0273369
JP2	1.65191	1	-0.000963484	0.121043	0.00794837	0.00633389	0.00140199	2.20547	0.000831187	5.94351e-05	0.00449422	0.000204534	0.00238038	0.00182039	0.000585436	0.00284264	0.0116353	0.0124427	0.0103311	0.0151795	0.00023451	0.000358161	2.86839e-05	0.000100394	149		7.08339	37	0.0328679	0.0526679	1.80751	0.0343779	29.2909	5.89671	1.17964	0.0587991	6.09239	0.139985	3.55019	3.12587	0.261301	8.22951	20.2769	15.529	19.5183	3.00634	0.140986	0.372601	0.0126954
JP2	1.73701	1	-0.000737517	0.182668	0.0075271	0.00570018	0.00151444	2.14019	0.002024	9.28552e-05	0.0039979	0.000304316	0.00230248	0.0016837	0.000988806	0.00272181	0.0112504	0.0115592	0.0101082	0.0152478	9.22209e-05	0.000386135	-6.34257e-06	0.000133067	150		7.44828	37	0.0251594	0.0794818	1.71171	0.0309383	31.6404	5.72217	2.8725	0.0918614	5.41957	0.208277	3.43401	2.89114	0.44134	7.8797	19.606	14.4264	19.0973	3.01986	0.0554426	0.401703	-0.0028072
JP2	1.68	1	-0.00113217	0.269638	0.00617969	0.0046468	0.00132225	2.0939	0.00260528	0.000373068	0.00341514	0.000377558	0.0023286	0.00142364	0.000546388	0.00299695	0.0113082	0.0115856	0.0110265	0.0144081	9.3267e-05	0.000390515	-6.41451e-06	9.96815e-05	151		7.20382	37	0.0386224	0.117324	1.4053	0.025221	27.6251	5.59842	3.69746	0.369075	4.62958	0.258404	3.47296	2.44458	0.243873	8.67623	19.7067	14.4594	20.8322	2.85356	0.0560715	0.40626	-0.00283905
JP2	1.63607	1	-0.00193064	0.396777	0.00747078	0.00531392	0.0013761	2.14983	0.0041992	0.000555191	0.00438314	0.000453597	0.00214883	0.0010897	0.000766314	0.00293267	0.0116431	0.0123497	0.0105783	0.0155654	9.45697e-05	0.000254441	-6.50411e-06	0.000207221	152		7.01544	37	0.0658612	0.172644	1.6989	0.0288418	28.7502	5.74795	5.95959	0.549249	5.9418	0.310446	3.20485	1.87116	0.342034	8.49013	20.2903	15.413	19.9854	3.08276	0.0568547	0.264699	-0.0028787
JP2	1.62924	1	-0.00195136	0.496371	0.00801133	0.0046055	0.00199761	2.03673	0.00486937	0.000656286	0.004455	0.000309684	0.00216753	0.0011516	0.000514676	0.00312094	0.0128901	0.0112357	0.00965377	0.012495	0.000164072	0.000182273	-6.45443e-06	6.51897e-05	153		6.98615	37	0.0665679	0.215979	1.82182	0.0249968	41.7349	5.44554	6.9107	0.649263	6.03921	0.21195	3.23274	1.97745	0.229719	9.03518	22.4636	14.0227	18.2387	2.47466	0.0986388	0.189622	-0.00285671
JP2	1.63466	1	0.00142772	0.907184	0.00742133	0.00470624	0.00170235	2.05337	0.00482863	0.00106862	0.00406919	0.000341911	0.00246276	0.00142051	0.000336278	0.0028511	0.0118412	0.0110372	0.00894558	0.0124949	0.000127881	0.000180748	-6.40043e-06	0.000134281	154		7.0094	37	-0.0487048	0.394732	1.68765	0.0255436	35.5662	5.49005	6.85288	1.05718	5.51622	0.234007	3.67306	2.43921	0.150093	8.25399	20.6355	13.775	16.9007	2.47464	0.0768809	0.188035	-0.00283281
JP2	1.67558	1	0.000825175	0.574653	0.00743272	0.00516258	0.0011496	2.19475	0.0050005	0.00110665	0.00414192	0.000281966	0.00255042	0.00129078	0.000816997	0.00298864	0.0113962	0.0122245	0.00825365	0.0118932	0.000204548	0.000187182	2.94294e-05	0.000139061	155		7.18489	37	-0.0281497	0.250041	1.69024	0.0280204	24.018	5.86804	7.09681	1.09481	5.6148	0.19298	3.8038	2.21645	0.364656	8.65217	19.86	15.2567	15.5935	2.35548	0.122973	0.194728	0.0130254
JP2	1.7675	1	-0.000655076	0.551383	0.00617721	0.00543136	0.00163785	2.23074	0.00516387	0.00120241	0.00320699	0.000350461	0.00248865	0.00138466	0.000701578	0.00238706	0.0126016	0.0108129	0.00706184	0.00995042	0.000309524	0.000149579	6.48176e-05	0.00010195	156		7.57901	37	0.022347	0.239916	1.40473	0.0294792	34.2188	5.96426	7.32866	1.18954	4.34741	0.239859	3.71168	2.37764	0.31314	6.91059	21.9607	13.495	13.3418	1.97071	0.186084	0.15561	0.0286881
JP2	1.78273	1	-0.000514266	0.478367	0.00599407	0.00545959	0.00150287	2.18846	0.00565744	0.00113691	0.00358277	0.000137036	0.00221459	0.00124836	0.000633476	0.00286584	0.0112303	0.00950443	0.00681156	0.00705936	9.58853e-05	0.000150357	2.928e-05	0.00010248	157		7.64433	37	0.0175435	0.208146	1.36309	0.0296325	31.3986	5.85122	8.02915	1.12474	4.85681	0.0937883	3.30294	2.1436	0.282744	8.29666	19.571	11.862	12.8689	1.39813	0.0576456	0.156419	0.0129592
JP2	1.76041	1	0.00176327	0.40218	0.0064854	0.00638399	0.00137005	2.22276	0.00354631	0.000623203	0.00394079	0.000240241	0.00224506	0.00122581	0.000445904	0.00249705	0.011874	0.0112019	0.00485571	0.00890529	0.000199834	0.000182868	-6.47551e-06	0.000100629	158		7.54862	37	-0.0601516	0.174996	1.47482	0.0346498	28.6237	5.94295	5.03298	0.616534	5.34216	0.164423	3.34838	2.10489	0.199023	7.22901	20.6928	13.9805	9.17381	1.76372	0.120139	0.190241	-0.00286604
JP2	1.69127	1	0.000473841	0.331368	0.005551	0.00541816	0.0012978	2.01253	0.00293386	0.000468919	0.00441408	0.000404827	0.00160055	0.00153431	0.000467786	0.00280454	0.0110303	0.010034	0.00574887	0.00656803	0.000125792	6.54774e-06	-6.29591e-06	-4.91081e-06	159		7.25215	37	-0.0161644	0.144184	1.26233	0.0294076	27.1143	5.38086	4.16378	0.463901	5.98375	0.277067	2.38712	2.63462	0.20879	8.11919	19.2224	12.5228	10.8612	1.30082	0.0756254	0.00681173	-0.00278655
JP2	1.7275	1	-0.000850755	0.242445	0.00680441	0.00558666	0.00107699	2.11462	0.00173152	0.000791332	0.00463403	0.000377331	0.00229232	0.00114379	0.000859926	0.00271616	0.0123138	0.0104613	0.00571415	0.00769979	0.000302455	0.000215911	2.84633e-05	9.96217e-05	160		7.4075	37	0.0290223	0.105492	1.54736	0.0303222	22.501	5.65381	2.4574	0.782863	6.28191	0.258249	3.41887	1.96404	0.383816	7.86334	21.4592	13.0562	10.7956	1.52497	0.181834	0.224616	0.0125978
JP2	1.69887	1	0.000636268	0.164587	0.00597297	0.00445763	0.00144666	2.12722	0.00160715	0.000596682	0.003908	0.000364928	0.00238561	0.00144347	0.000460655	0.00269433	0.0117741	0.011502	0.00589767	0.00714281	0.000157602	0.000208814	-6.19994e-06	0.000163802	161		7.28476	37	-0.0217054	0.0716147	1.35829	0.0241943	30.2242	5.68749	2.28089	0.590296	5.2977	0.24976	3.558	2.47863	0.205607	7.80015	20.5187	14.355	11.1424	1.41465	0.0947495	0.217233	-0.00274408
JP2	1.68781	1	0.00132134	0.110982	0.00671514	0.00461514	0.00118229	2.15154	0.00127612	0.000294575	0.00368997	0.000163362	0.00256716	0.00107774	0.000666283	0.00257201	0.0120357	0.00935277	0.00697806	0.00856826	0.000192271	7.42668e-05	2.76631e-05	2.90338e-05	162		7.2373	37	-0.0450756	0.0482904	1.52706	0.0250491	24.7009	5.75253	1.81109	0.291423	5.00214	0.111806	3.82876	1.85063	0.297386	7.44603	20.9746	11.6727	13.1835	1.69697	0.115592	0.077261	0.0122436
JP2	1.72054	1	-0.000145215	0.0788163	0.00662754	0.00489728	0.000879158	2.18543	0.000973193	0.000465055	0.00403803	0.000265621	0.00240257	0.0012839	0.00073567	0.00329128	0.0133884	0.0125019	0.00682343	0.0095044	0.000260625	0.000210299	2.77234e-05	0.000198934	163		7.37767	37	0.0049538	0.0342943	1.50714	0.0265805	18.3678	5.84312	1.38117	0.460078	5.47397	0.181793	3.5833	2.20462	0.328357	9.52831	23.3319	15.6029	12.8914	1.88237	0.156686	0.218777	0.0122703
JP2	1.69967	1	-0.000651606	0.0523996	0.0069361	0.00545763	0.00124137	2.10948	0.000392029	0.000191499	0.0040674	0.00039772	0.00301966	0.00130549	0.000829706	0.0027553	0.01269	0.0102619	0.00696124	0.0103916	0.000157232	0.000511159	-6.18537e-06	2.88238e-05	164		7.28817	37	0.0222286	0.0228	1.57731	0.0296218	25.9352	5.64007	0.556375	0.18945	5.51378	0.272203	4.50365	2.2417	0.370328	7.97665	22.1147	12.8074	13.1517	2.05809	0.094527	0.531768	-0.00273763
JP2	1.57171	1	0.00137911	0.0329476	0.00752428	0.00473359	0.00094827	1.96691	0.000349686	0.000186854	0.00423138	0.000256743	0.00196112	0.00120815	0.000546921	0.00275412	0.0127764	0.0109664	0.00767949	0.0117493	2.20893e-05	0.000334598	-6.03532e-06	6.09567e-05	165		6.73949	37	-0.0470465	0.0143361	1.71107	0.0256921	19.8117	5.25887	0.496282	0.184854	5.73608	0.175717	2.92489	2.07456	0.244111	7.97324	22.2654	13.6866	14.5087	2.32698	0.0132799	0.348088	-0.00267122
JP2	1.64127	1	-0.00144084	0.0286942	0.0073362	0.0054162	0.00149093	2.04045	0.000414643	0.000451672	0.00369665	0.000385072	0.0025173	0.00145197	0.000557263	0.00309219	0.0129586	0.0119942	0.00971383	0.01384	0.00030866	0.000611824	-6.54218e-06	-5.1029e-06	166		7.03774	37	0.0491524	0.0124853	1.6683	0.029397	31.1491	5.45549	0.588469	0.446838	5.01119	0.263547	3.7544	2.49323	0.248727	8.95194	22.5829	14.9693	18.3522	2.74105	0.185564	0.636491	-0.00289555
JP2	1.6216	1	0.000488423	0.0242899	0.00794913	0.00661011	0.00278554	2.12348	0.000128884	0.000412742	0.00412592	0.000417285	0.00239118	0.00200517	0.000835218	0.00335014	0.0126777	0.0127109	0.0113678	0.0152836	0.000341485	0.00103056	-6.48965e-06	0.00020676	167		6.95343	37	-0.0166619	0.0105689	1.80768	0.035877	58.1968	5.67748	0.182915	0.408325	5.59311	0.285593	3.5663	3.44315	0.372788	9.69873	22.0933	15.8638	21.4771	3.02697	0.205299	1.07211	-0.0028723
JP2	1.67532	1	-0.00137395	0.0221838	0.00717279	0.00613172	0.00100501	2.13396	0.000196627	0.000441611	0.00413661	0.000341699	0.00263556	0.00162841	0.000892817	0.00375439	0.0123213	0.0122845	0.0103336	0.0147158	0.000162598	0.00108535	-6.39645e-06	9.94009e-05	168		7.18374	37	0.0468705	0.00965256	1.63113	0.0332805	20.9971	5.70551	0.279057	0.436885	5.6076	0.233861	3.93078	2.7962	0.398497	10.869	21.4723	15.3316	19.5231	2.91451	0.0977527	1.12911	-0.00283105
JP2	1.69408	1	-0.00180768	0.0226414	0.00775586	0.00625	0.00143409	2.19885	0.00037352	0.000655498	0.00469513	0.000519731	0.00332258	0.00188668	0.000619268	0.00325782	0.013542	0.0141369	0.0107307	0.0165863	0.000198944	0.00151471	-6.44667e-06	0.000100181	169		7.26418	37	0.0616666	0.00985165	1.76373	0.0339225	29.9617	5.879	0.530107	0.648483	6.36474	0.355708	4.95543	3.23969	0.276402	9.43145	23.5996	17.6434	20.2734	3.28496	0.119604	1.57578	-0.00285328
JP2	1.73121	1	0.000409232	0.0224128	0.00741103	0.00485115	0.00169205	2.25426	2.25204e-05	0.000508427	0.00421796	0.000236019	0.00279428	0.00210407	0.000749536	0.00363017	0.0128437	0.0139505	0.0118366	0.0174415	0.000196322	0.000975631	2.8246e-05	6.42532e-05	170		7.42342	37	-0.0139604	0.00975221	1.68531	0.0263301	35.3511	6.02716	0.0319614	0.502986	5.71788	0.161534	4.1675	3.61297	0.334545	10.5094	22.3827	17.4109	22.3626	3.45434	0.118028	1.01496	0.0125016
JP2	1.65067	1	-0.000510511	0.0198662	0.00782426	0.00592899	0.0013937	2.15184	0.000154724	0.000255875	0.00442071	0.000326693	0.00228661	0.00205593	0.000986684	0.00392254	0.0109475	0.0143772	0.0129109	0.0177657	0.000288532	0.00113749	-6.11556e-06	9.50357e-05	171		7.07805	37	0.0174154	0.00864414	1.77928	0.0321802	29.1178	5.75333	0.219587	0.253136	5.99273	0.223592	3.41034	3.53031	0.440393	11.3558	19.0782	17.9434	24.3924	3.51855	0.173463	1.18335	-0.00270673
JP2	1.67926	1	-0.000177827	0.0190393	0.00885699	0.00643446	0.00147684	2.37164	0.000223776	0.000393371	0.00443731	0.00029676	0.00251482	0.00244941	0.000728725	0.00326021	0.0134642	0.0143384	0.0135971	0.0189445	8.99309e-05	0.000881249	-6.18507e-06	2.88224e-05	172		7.20064	37	0.00606632	0.00828431	2.01413	0.0349237	30.8547	6.341	0.317587	0.389161	6.01524	0.203105	3.7507	4.20598	0.325257	9.43836	23.464	17.895	25.6887	3.752	0.0540659	0.916778	-0.0027375
JP2	1.61274	1	-0.00187377	0.0187762	0.00774627	0.0050277	0.00137186	2.06674	0.000244699	0.000597813	0.00421799	0.000410026	0.00219829	0.00220041	0.000884608	0.00325898	0.0121261	0.0136937	0.0126688	0.0179441	5.35021e-05	0.000677772	2.61043e-05	0.000123349	173		6.91541	37	0.063921	0.00816987	1.76155	0.0272883	28.6614	5.52578	0.347281	0.591415	5.71792	0.280626	3.27862	3.7784	0.394833	9.43481	21.1321	17.0903	23.9349	3.55388	0.0321651	0.705098	0.0115537
JP2	1.67597	1	0.000400479	0.0267921	0.00779542	0.00613765	0.00158812	2.20029	0.000292978	0.00039595	0.00558472	0.000264839	0.00215843	0.00226227	0.000564167	0.00412861	0.0136203	0.0142289	0.012533	0.018899	0.000158256	0.000582222	-6.22564e-06	2.90115e-05	174		7.18654	37	-0.0136618	0.0116577	1.77272	0.0333127	33.1798	5.88285	0.415801	0.391713	7.57067	0.181258	3.21917	3.88463	0.251808	11.9524	23.736	17.7583	23.6784	3.743	0.0951423	0.605695	-0.00275545
JP2	1.58989	1	-0.000651891	0.0190178	0.00704718	0.00567271	0.00143701	2.07641	0.000244902	0.000630319	0.00441354	0.000154284	0.00159192	0.0021062	0.000533229	0.00367781	0.0128093	0.0148593	0.0128393	0.0177986	8.55567e-05	0.000550293	2.6126e-05	5.94307e-05	175		6.81743	37	0.0222384	0.00827497	1.60257	0.0307892	30.0227	5.55164	0.347569	0.623573	5.98302	0.105594	2.37426	3.61664	0.237999	10.6473	22.3227	18.5451	24.2571	3.52506	0.0514361	0.572479	0.0115633
JP2	1.75752	1	-0.000920823	0.0221271	0.0075728	0.00820579	0.001984	2.22678	0.000127312	0.000512324	0.00470363	9.83365e-05	0.00243175	0.00239918	0.000650662	0.00376261	0.0131518	0.0154897	0.0143021	0.0189367	0.0002327	0.000913363	-6.41046e-06	0.000169364	176		7.53621	37	0.0314126	0.00962788	1.7221	0.0445378	41.4507	5.95368	0.180683	0.506841	6.37627	0.0673024	3.62681	4.11972	0.290414	10.8928	22.9195	19.3318	27.0208	3.75046	0.139898	0.950187	-0.00283726
JP2	1.69175	1	-0.00131572	0.0232047	0.00808336	0.00777121	0.00192773	2.20412	0.0003038	0.000445694	0.00435045	0.000274621	0.00209768	0.00234583	0.00100643	0.0040704	0.0125409	0.0154228	0.0150711	0.0196322	0.000339693	0.000673964	6.37813e-05	3.00831e-05	177		7.2542	37	0.0448839	0.0100968	1.8382	0.042179	40.2751	5.89311	0.431159	0.440925	5.89749	0.187953	3.12857	4.02812	0.449205	11.7839	21.855	19.2483	28.4736	3.88822	0.204221	0.701136	0.0282294
JP2	1.64029	1	-0.00426102	0.0208215	0.00863328	0.00614964	0.0015403	2.04159	0.000189657	0.000224578	0.0054003	0.000363149	0.00150134	0.00264504	0.000626226	0.00375556	0.0147418	0.0152107	0.0140003	0.01752	5.61444e-05	0.000576992	-6.16971e-06	9.58773e-05	178		7.03353	37	0.145359	0.0090598	1.96326	0.0333778	32.1805	5.45855	0.269165	0.222174	7.32067	0.248543	2.23916	4.5419	0.279507	10.8724	25.6904	18.9836	26.4505	3.46988	0.0337536	0.600254	-0.0027307
JP2	1.60321	1	-0.00129664	0.023187	0.00748711	0.0084365	0.00147921	2.20939	0.000291537	0.000225498	0.00683854	0.000364637	0.0021141	0.00306029	0.000729894	0.0044453	0.0131145	0.0158807	0.0132812	0.0201557	0.000191178	0.000511954	6.12066e-05	2.88687e-05	179		6.87455	37	0.0442331	0.0100891	1.70261	0.04579	30.9042	5.90718	0.413754	0.223085	9.27035	0.249561	3.15306	5.25494	0.325779	12.8692	22.8545	19.8198	25.0919	3.9919	0.114935	0.532595	0.0270899
JP2	1.58647	1	-8.60373e-06	0.0232041	0.00830337	0.00722622	0.00198618	2.15189	0.000190574	0.000360566	0.00610126	0.000196278	0.00201448	0.00228652	0.000696705	0.00407759	0.0130904	0.0154192	0.0141692	0.020069	0.000258769	0.000411154	9.49771e-05	6.26154e-05	180		6.80279	37	0.000293505	0.0100965	1.88824	0.0392211	41.4961	5.75344	0.270466	0.356707	8.2709	0.134334	3.00448	3.92626	0.310965	11.8047	22.8125	19.2438	26.7695	3.97473	0.15557	0.42773	0.0420366
JP2	1.59578	1	-0.00158983	0.0380286	0.00742047	0.00742462	0.00201244	2.16606	0.000500637	0.000262818	0.00587404	0.000198873	0.00210946	0.00252212	0.000671745	0.00447321	0.0130922	0.0140829	0.0135354	0.0171533	0.000159676	0.000553276	2.78899e-05	0.000131786	181		6.84268	37	0.0542348	0.0165469	1.68746	0.0402979	42.0447	5.79135	0.710513	0.260006	7.96288	0.13611	3.14613	4.33082	0.299824	12.95	22.8158	17.5761	25.5721	3.39727	0.0959962	0.575582	0.012344
JP2	1.64544	1	0.00185681	0.0692191	0.00780733	0.00795186	0.00188541	2.24634	0.00058252	0.000374027	0.00713405	0.00107822	0.00278973	0.0023369	0.00107256	0.00447471	0.0143148	0.0158899	0.0139974	0.0193825	0.000303415	0.000916289	2.85537e-05	0.000134922	182		7.05561	37	-0.0633424	0.0301184	1.77543	0.0431595	39.3907	6.00598	0.826724	0.370024	9.67094	0.737945	4.16073	4.01277	0.478724	12.9544	24.9463	19.8313	26.4451	3.83876	0.182411	0.953231	0.0126378
JP2	1.67017	1	0.00121533	0.116795	0.00802339	0.00802774	0.00196473	2.25569	0.00131182	0.000525834	0.00658257	0.00113891	0.00217373	0.00353658	0.000596234	0.00422011	0.0155058	0.0169021	0.0142132	0.0201526	0.000346213	0.00104482	6.50054e-05	3.06605e-05	183		7.16166	37	-0.0414593	0.0508197	1.82457	0.0435714	41.0481	6.03098	1.86176	0.520206	8.92336	0.779481	3.242	6.07278	0.266121	12.2173	27.0219	21.0946	26.8528	3.99127	0.208141	1.08695	0.0287712
JP2	1.67312	1	0.00232813	0.160611	0.00552123	0.00697432	0.00231862	2.11425	0.00106507	0.000528021	0.00696334	0.0004987	0.00207732	0.0028202	0.000526907	0.0046073	0.012455	0.0148795	0.0129583	0.0186435	2.26401e-05	0.000780402	9.47666e-05	0.000163429	184		7.17433	37	-0.0794208	0.0698845	1.25556	0.0378538	48.4416	5.65282	1.51157	0.52237	9.43953	0.341315	3.0982	4.84267	0.235178	13.3382	21.7052	18.5703	24.4819	3.6924	0.0136111	0.811865	0.0419435
JP2	1.6898	1	-0.000948198	0.177127	0.00820342	0.0072378	0.00203689	2.13557	0.00119845	0.000611879	0.00653374	0.000754676	0.00241179	0.00338285	0.000437801	0.00438922	0.0137712	0.0164714	0.0120718	0.0176734	0.000265376	0.000456239	-6.35785e-06	9.88009e-05	185		7.24587	37	0.0323465	0.0770708	1.8655	0.0392839	42.5556	5.70983	1.70087	0.605331	8.85717	0.516507	3.59704	5.80881	0.195407	12.7069	23.9989	20.557	22.8071	3.50027	0.159543	0.474633	-0.00281397
JP2	1.59776	1	0.00213869	0.187196	0.00794142	0.00711059	0.00196356	2.06702	0.0019225	0.000689875	0.00729976	0.000660824	0.0019582	0.00259423	0.000755455	0.00343067	0.0127743	0.0135738	0.0129729	0.0175043	0.000189139	0.000773229	0.000127237	0.000128585	186		6.8512	37	-0.0729584	0.0814524	1.80593	0.0385935	41.0235	5.52655	2.72844	0.682492	9.89559	0.452273	2.92054	4.45464	0.337187	9.93187	22.2616	16.9407	24.5094	3.46677	0.113709	0.804403	0.0563148
JP2	1.69064	1	0.000904909	0.193616	0.0079744	0.00767556	0.00167744	2.14571	0.00140035	0.000393071	0.00725979	0.000666366	0.00204187	0.0031203	0.000795412	0.0039641	0.0129826	0.0142939	0.0122062	0.0177855	8.98624e-05	0.000846956	-6.18036e-06	0.000163285	187		7.24946	37	-0.0308697	0.0842455	1.81343	0.0416599	35.0458	5.73693	1.9874	0.388864	9.8414	0.456067	3.04532	5.35799	0.355021	11.4761	22.6247	17.8394	23.061	3.52248	0.0540247	0.881102	-0.00273541
JP2	1.76215	1	2.5388e-05	0.171779	0.00642744	0.00862126	0.00167795	2.24393	0.00163619	0.000225034	0.00729564	0.000565675	0.00160528	0.00288584	0.000560235	0.00423436	0.0114039	0.014197	0.01056	0.0181616	0.000190784	0.000712689	-6.18225e-06	9.60721e-05	188		7.5561	37	-0.000866077	0.074744	1.46164	0.0467928	35.0565	5.99953	2.32212	0.222625	9.89	0.387153	2.39418	4.95538	0.250053	12.2586	19.8735	17.7185	19.9508	3.59696	0.114698	0.741423	-0.00273625
JP2	1.74409	1	-0.000578683	0.163614	0.00714035	0.00714439	0.00159691	2.24686	0.00142213	0.000389826	0.00730023	0.00032743	0.00145817	0.00309455	0.000255349	0.00386469	0.0124413	0.0127398	0.011638	0.0151693	0.000322526	0.000673247	2.72143e-05	6.19064e-05	189		7.47865	37	0.019741	0.0711915	1.62376	0.0387769	33.3633	6.00736	2.01831	0.385654	9.89623	0.224096	2.17478	5.31377	0.113971	11.1884	21.6814	15.8998	21.9874	3.00433	0.193901	0.700391	0.012045
JP2	1.71152	1	-0.000337241	0.164779	0.0072961	0.00824982	0.0015004	2.19218	0.0014925	0.000414924	0.00738683	0.000321049	0.00192016	0.00306694	0.000642699	0.00463975	0.0126899	0.0128518	0.0104618	0.0167062	0.000316241	0.000888984	2.6684e-05	2.80061e-05	190		7.339	37	0.0115045	0.071698	1.65918	0.0447768	31.347	5.86117	2.11818	0.410483	10.0136	0.219729	2.86381	5.26635	0.28686	13.4322	22.1147	16.0396	19.7652	3.30871	0.190122	0.924825	0.0118103
JP2	1.5972	1	-3.95685e-05	0.164571	0.00514106	0.00691285	0.00128917	2.08324	0.0013446	0.000242471	0.00718598	0.000309579	0.00191462	0.00261059	0.000493635	0.00412689	0.0119841	0.0123611	0.0101829	0.0144054	0.000210366	0.000258234	-5.7952e-06	0.000184635	191		6.84876	37	0.00134982	0.0716075	1.16911	0.0375202	26.9338	5.56991	1.90828	0.239876	9.74135	0.211879	2.85554	4.48274	0.220327	11.9474	20.8845	15.4273	19.2384	2.85303	0.12647	0.268645	-0.00256494
JP2	1.60607	1	-0.000637118	0.134051	0.00674898	0.00639074	0.00147697	2.07276	0.000876818	0.000285943	0.00835567	0.000290176	0.00137298	0.00318501	0.000515156	0.00466905	0.0135939	0.0138226	0.0103633	0.0155931	0.000351138	0.000499795	2.68525e-05	0.000126884	192		6.88681	37	0.0217344	0.0583277	1.53476	0.0346864	30.8576	5.54189	1.2444	0.282882	11.327	0.198599	2.04773	5.46909	0.229933	13.517	23.69	17.2512	19.5792	3.08825	0.211102	0.519945	0.0118848
JP2	1.50714	1	-4.25449e-05	0.0986724	0.00657996	0.00763659	0.00155563	2.13373	0.000869492	0.000294608	0.00969462	9.55856e-05	0.00178746	0.00277307	0.000530768	0.00436954	0.0150245	0.0151242	0.0123743	0.0162016	0.000429574	0.000311557	6.15636e-05	0.000164627	193		6.46261	37	0.00145136	0.0429341	1.49632	0.0414484	32.5009	5.70489	1.234	0.291455	13.1421	0.0654196	2.6659	4.76174	0.236901	12.6499	26.183	18.8756	23.3785	3.20876	0.258257	0.324118	0.0272479
JP2	1.50609	1	-0.000442327	0.0665917	0.00654354	0.00707935	0.00145701	2.18168	0.000619111	0.000255309	0.00956013	0.000226385	0.00221516	0.00301436	0.00051977	0.00421261	0.0137156	0.0145449	0.0127164	0.0172946	0.000221503	0.000404686	6.0288e-05	6.16304e-05	194		6.45808	37	0.0150894	0.0289752	1.48804	0.0384239	30.4404	5.8331	0.878654	0.252576	12.9598	0.15494	3.30378	5.17608	0.231992	12.1956	23.9022	18.1527	24.0248	3.42523	0.133166	0.421002	0.0266833
JP2	1.60986	1	2.6153e-05	0.0527895	0.00696791	0.00766639	0.00172851	2.40368	0.000368992	9.32352e-05	0.0104977	0.000374851	0.0020001	0.00304208	0.000473181	0.00543663	0.0166397	0.0145901	0.0127164	0.0168359	0.000369757	0.000179847	6.2921e-05	0.000168256	195		6.90307	37	-0.000892173	0.0229696	1.58454	0.0416101	36.1128	6.42667	0.523681	0.0922374	14.2307	0.256552	2.98303	5.22367	0.211198	15.7392	28.9979	18.2091	24.0249	3.33441	0.222295	0.187098	0.0278487
JP2	1.5843	1	0.00293366	0.0544504	0.00766279	0.00836453	0.00198022	2.33374	0.00050994	0.000128477	0.0106166	0.000202568	0.00162656	0.00364799	0.00085826	0.005462	0.015253	0.0143446	0.012497	0.0161829	0.000336676	0.000319912	0.000167634	0.000203848	196		6.79348	37	-0.100078	0.0236923	1.74256	0.0453993	41.3716	6.23966	0.723716	0.127102	14.392	0.13864	2.42592	6.26409	0.383073	15.8126	26.5813	17.9027	23.6103	3.20506	0.202407	0.33281	0.0741944
JP2	1.54214	1	-0.000443807	0.0813998	0.00656543	0.00850422	0.00212833	2.27134	0.00055457	8.96324e-05	0.00919211	9.39181e-05	0.0013233	0.00359065	0.000488203	0.00592631	0.0143287	0.0153276	0.0112915	0.0167855	0.000322162	0.00040604	0.000160408	0.000561427	197		6.61267	37	0.0151399	0.0354185	1.49302	0.0461575	44.4661	6.07283	0.787056	0.0886732	12.4609	0.0642784	1.97363	6.16564	0.217903	17.1568	24.9706	19.1295	21.3328	3.32442	0.193682	0.42241	0.0709961
JP2	1.54136	1	-0.00205421	0.120181	0.00613954	0.00858823	0.00175918	2.22799	0.000801774	0.000125133	0.0117316	0.000197297	0.00165203	0.00385815	0.000395216	0.00528595	0.0136675	0.0151937	0.0115947	0.0148796	0.000463516	0.000447189	0.000332774	0.00209732	198		6.60932	37	0.0700766	0.0522926	1.39617	0.0466135	36.7536	5.95691	1.13789	0.123794	15.9034	0.135032	2.46391	6.62498	0.176399	15.3029	23.8183	18.9625	21.9057	2.94695	0.278663	0.465218	0.147285
JP2	1.24504	1	-0.00182801	0.126715	0.00519936	0.0065187	0.00163175	1.74945	0.00130355	0.000282928	0.0102201	0.000140713	0.0013935	0.00276786	0.000457129	0.00452266	0.0114195	0.0115638	0.00928358	0.012259	0.000311586	0.000355915	0.000344967	0.00148502	199		5.33871	37	0.0623602	0.0551357	1.18237	0.0353809	34.0912	4.67746	1.85003	0.279901	13.8544	0.0963052	2.07832	4.7528	0.204033	13.0932	19.9007	14.4321	17.5393	2.42793	0.187324	0.370264	0.152681
JP2	1.29526	1	-0.00124798	0.177	0.00577669	0.00759997	0.00181293	1.96912	0.000832011	0.000249472	0.0118421	0.000350954	0.0012563	0.00281571	0.000475452	0.00470048	0.0130122	0.0120035	0.00924272	0.0135878	0.000475929	0.000525179	0.000285963	0.000838689	200		5.55407	37	0.0425733	0.0770156	1.31365	0.0412496	37.8766	5.26479	1.18081	0.246802	16.0532	0.240196	1.8737	4.83496	0.212211	13.608	22.6763	14.9809	17.4621	2.6911	0.286125	0.546353	0.126566
JP2	1.34324	1	0.000863409	0.197728	0.00573556	0.00814303	0.00162958	2.03657	0.00152154	0.000223017	0.0117678	0.000260635	0.00142424	0.00319327	0.000488554	0.00493	0.0131038	0.0138694	0.010365	0.0147628	0.000622364	0.000339672	0.000327173	0.00106178	201		5.75981	37	-0.029454	0.0860347	1.3043	0.0441971	34.0459	5.44513	2.15939	0.22063	15.9525	0.178381	2.12418	5.48328	0.218059	14.2725	22.8359	17.3097	19.5824	2.92382	0.374161	0.353366	0.144806
JP2	1.3048	1	-0.00155112	0.186457	0.00561908	0.00715965	0.00193003	1.91439	0.000817854	0.000358777	0.00963689	0.000209287	0.00140341	0.00254119	0.000327074	0.00472332	0.0121881	0.0118788	0.00809949	0.0128244	0.000296837	0.000374121	0.00027055	0.000547982	202		5.59495	37	0.0529144	0.0811306	1.27781	0.0388597	40.3231	5.11847	1.16071	0.354938	13.0638	0.143238	2.0931	4.36358	0.145985	13.6741	21.2402	14.8253	15.3022	2.53991	0.178457	0.389205	0.119745
JP2	1.33675	1	-0.000901406	0.182816	0.00526865	0.00809995	0.00174134	1.91742	0.00132128	0.000339154	0.0113593	0.00027979	0.00138729	0.00326135	0.000369827	0.00462883	0.0125354	0.0127242	0.0109133	0.0136062	0.000624075	0.000196401	8.93369e-05	0.000376125	203		5.73196	37	0.0307502	0.0795464	1.19812	0.0439633	36.3808	5.12655	1.87518	0.335524	15.3987	0.191491	2.06906	5.60018	0.165067	13.4005	21.8453	15.8803	20.6183	2.69474	0.37519	0.204319	0.0395403
JP2	0.992654	1	-0.000762892	0.116234	0.00411705	0.00553282	0.00169066	1.43301	0.000462054	0.000251385	0.00799592	0.000277924	0.0010753	0.00218222	0.000180067	0.00312504	0.00809056	0.00936077	0.0068885	0.010038	0.000392033	5.15218e-05	1.9191e-05	0.000255275	204		4.25649	37	0.026025	0.0505752	0.936241	0.0300299	35.3221	3.8314	0.655756	0.248695	10.8393	0.190214	1.60375	3.74717	0.0803705	9.04704	14.0994	11.6827	13.0143	1.98806	0.235688	0.053599	0.0084939
JP2	1.26053	1	-0.000805395	0.129009	0.00476019	0.00772711	0.00191831	1.82644	0.000629878	0.000173589	0.0106166	0.000147013	0.00121187	0.00319679	0.000538598	0.00390129	0.0118695	0.0116234	0.0095464	0.0112816	0.000478044	0.000371849	5.53961e-05	0.00027014	205		5.40514	37	0.0274749	0.056134	1.0825	0.0419397	40.0782	4.88329	0.893935	0.171732	14.392	0.100617	1.80744	5.48933	0.240396	11.2943	20.6849	14.5065	18.0358	2.23434	0.287397	0.386841	0.0245182
JP2	1.24519	1	-0.000720822	0.112291	0.005644	0.00725305	0.00221632	1.78508	0.00100642	0.000329544	0.00924747	0.000271863	0.00131716	0.00326142	0.000328524	0.00412748	0.0107913	0.0124564	0.00896858	0.0139919	0.000298154	0.000406604	2.51578e-05	0.000180524	206		5.33937	37	0.0245898	0.0488596	1.28348	0.0393667	46.3042	4.77271	1.42834	0.326018	12.5359	0.186065	1.96446	5.6003	0.146632	11.9491	18.8059	15.5462	16.9442	2.77113	0.179248	0.422997	0.0111348
JP2	1.35114	1	-0.00236478	0.0970352	0.00514976	0.00763222	0.00214163	1.8929	0.000747422	0.000154798	0.00894169	0.000159044	0.00154203	0.00302944	0.000318694	0.00428656	0.0123122	0.0123433	0.00933674	0.0152759	0.000385175	0.00027029	9.29273e-05	0.000292248	207		5.79369	37	0.0806713	0.0422217	1.17108	0.0414246	44.7438	5.06101	1.06075	0.153141	12.1214	0.108851	2.29986	5.20197	0.142245	12.4097	21.4564	15.405	17.6397	3.02544	0.231565	0.281187	0.0411294
JP2	1.3578	1	-0.00135081	0.0675832	0.00657237	0.00846119	0.00215159	2.16056	0.000432791	0.000160489	0.0106402	0.000233312	0.00156451	0.00365397	0.000261989	0.00540273	0.012628	0.0141675	0.0117008	0.0156664	0.00019407	0.000211805	-6.28873e-06	0.000200359	208		5.82225	37	0.0460812	0.0294066	1.49459	0.045924	44.952	5.77663	0.614225	0.158771	14.4239	0.159681	2.33338	6.27437	0.116935	15.641	22.0067	17.6817	22.1061	3.10278	0.116674	0.220344	-0.00278338
JP2	1.48541	1	-0.000955991	0.0516113	0.00621032	0.00855474	0.00194902	2.18943	0.000406272	2.4102e-05	0.0100777	0.000481912	0.00149009	0.00466636	0.000511142	0.00494871	0.0138495	0.0141268	0.010635	0.0171903	0.000441913	0.000215892	-6.4101e-06	0.000169355	209		6.36943	37	0.0326123	0.022457	1.41226	0.0464317	40.7198	5.85382	0.576589	0.023844	13.6614	0.329825	2.22239	8.01277	0.228141	14.3266	24.1354	17.6308	20.0925	3.40459	0.265675	0.224596	-0.0028371
JP2	1.50971	1	-0.00214183	0.0448896	0.00498578	0.00867141	0.00232942	2.23416	0.000270427	9.51238e-05	0.0110999	0.000241058	0.00143972	0.00405806	0.000306034	0.00466239	0.01464	0.0142841	0.0116291	0.0172123	0.0003419	0.000395569	2.8849e-05	0.000313051	210		6.47363	37	0.0730655	0.0195323	1.1338	0.047065	48.6673	5.97342	0.383795	0.0941058	15.047	0.164982	2.14726	6.96824	0.136594	13.4977	25.513	17.8272	21.9706	3.40895	0.205548	0.411518	0.0127685
JP2	1.45125	1	-0.00432173	0.0367806	0.00555128	0.00807821	0.00254978	2.17533	0.000294483	9.16114e-05	0.0104514	0.000266199	0.00145464	0.0033976	0.000601106	0.00496715	0.0134176	0.0147112	0.0125974	0.0167133	0.00019311	0.000108632	2.77838e-05	6.32019e-05	211		6.22295	37	0.14743	0.0160039	1.26239	0.0438453	53.2711	5.81613	0.417936	0.090631	14.1679	0.182189	2.16952	5.83414	0.268296	14.38	23.3827	18.3602	23.8001	3.31011	0.116096	0.113012	0.012297
JP2	1.39874	1	-0.0020321	0.0352057	0.00577564	0.0087863	0.00177769	2.13534	0.00021938	5.57849e-05	0.00979711	0.000126001	0.00147551	0.00431514	0.00048351	0.00547318	0.0147857	0.0147175	0.01257	0.0158319	0.00028608	0.000237207	2.69223e-05	0.000127214	212		5.99777	37	0.0693222	0.0153186	1.31341	0.0476885	37.1402	5.7092	0.311349	0.0551879	13.281	0.0862363	2.20064	7.40968	0.215808	15.845	25.767	18.3681	23.7482	3.13554	0.171989	0.246771	0.0119157
JP2	1.37934	1	0.000243902	0.0285502	0.0062619	0.00755077	0.00221854	2.12324	0.000176812	0.000178077	0.00982599	0.000244683	0.00152481	0.00331073	0.000208332	0.00497277	0.0135866	0.0153088	0.0111406	0.0153937	0.000427822	9.9852e-05	-5.75184e-06	0.000151964	213		5.91459	37	-0.00832039	0.0124227	1.42399	0.0409826	46.3507	5.67686	0.250934	0.176171	13.3202	0.167464	2.27417	5.68498	0.0929861	14.3963	23.6772	19.1061	21.0476	3.04877	0.257204	0.103878	-0.00254575
JP2	1.40721	1	-0.00119026	0.0356601	0.00648299	0.00914386	0.00251453	2.2663	0.000290412	0.000123916	0.00980264	0.000228948	0.00203881	0.00412275	0.000257088	0.00493205	0.0152832	0.0160211	0.0116501	0.0162804	0.000492577	0.000207843	-6.1711e-06	9.58988e-05	214		6.0341	37	0.0406039	0.0155163	1.47427	0.0496292	52.5346	6.05934	0.412158	0.122589	13.2885	0.156694	3.04076	7.07933	0.114748	14.2784	26.634	19.9951	22.0103	3.22439	0.296134	0.216222	-0.00273131
JP2	1.48559	1	0.000299084	0.0425189	0.00628761	0.0078906	0.00179664	2.29571	0.000361784	9.14137e-05	0.0114149	0.00016372	0.00151944	0.00410359	0.000463937	0.00482056	0.0150897	0.0167552	0.012128	0.016575	9.07893e-05	0.000244269	2.77238e-05	2.90975e-05	215		6.37022	37	-0.0102028	0.0185007	1.42984	0.0428271	37.5363	6.13798	0.51345	0.0904354	15.4741	0.112052	2.26616	7.04643	0.207072	13.9556	26.2968	20.9112	22.9131	3.28272	0.0545819	0.254118	0.0122705
JP2	1.51748	1	-0.00129059	0.0554297	0.00599716	0.00917569	0.00254577	2.30025	0.000676924	0.000127153	0.0111969	6.26898e-05	0.00202317	0.00364484	0.000436043	0.00585353	0.0155788	0.0174748	0.0118163	0.0166368	0.000195415	0.000109929	-6.33231e-06	0.000132852	216		6.50692	37	0.0440267	0.0241184	1.36379	0.049802	53.1873	6.15012	0.960703	0.125792	15.1785	0.0429055	3.01744	6.25869	0.194622	16.9461	27.1491	21.8094	22.3244	3.29497	0.117482	0.114361	-0.00280266
JP2	1.49711	1	-0.00117001	0.0726749	0.00552991	0.00966879	0.00262031	2.26907	0.000967305	5.91624e-05	0.0111606	0.000203596	0.00173976	0.00401632	0.000547767	0.0059095	0.0159961	0.0176414	0.0112292	0.0152847	0.0003034	0.000426484	-6.4307e-06	6.495e-05	217		6.41961	37	0.0399133	0.0316221	1.25753	0.0524784	54.7446	6.06676	1.37282	0.0585292	15.1294	0.139343	2.59475	6.89657	0.244488	17.1081	27.8763	22.0173	21.2152	3.02718	0.182402	0.443678	-0.00284621
JP2	1.52625	1	-0.00217371	0.0840992	0.0053137	0.0088641	0.00197505	2.21624	0.000751616	0.00044058	0.0102063	0.000132608	0.00155288	0.00377732	0.000613009	0.0058296	0.0149698	0.0173326	0.0118387	0.0165228	0.000439942	0.000180214	-6.38152e-06	6.44534e-05	218		6.54457	37	0.0741533	0.036593	1.20837	0.0481108	41.2635	5.9255	1.06671	0.435865	13.8357	0.0907581	2.31603	6.48617	0.273608	16.8768	26.0878	21.6318	22.3667	3.27239	0.26449	0.18748	-0.00282445
JP2	1.46014	1	-0.000339588	0.0843317	0.00639052	0.00969258	0.00233421	2.13078	0.000679851	0.000319047	0.00875641	0.000125755	0.00196645	0.00358211	0.000548408	0.00496834	0.0146248	0.0164698	0.0108312	0.0139228	0.000186756	0.000368429	-6.05173e-06	6.11225e-05	219		6.26108	37	0.0115846	0.0366942	1.45324	0.0526075	48.7673	5.697	0.964858	0.315633	11.8702	0.0860678	2.93284	6.15097	0.244774	14.3834	25.4866	20.555	20.4632	2.75744	0.112277	0.383283	-0.00267848
JP2	1.42744	1	-0.00127747	0.0701617	0.00561404	0.00771282	0.00235414	2.13156	0.000652456	0.000487786	0.00956233	0.000193234	0.00151841	0.00374551	0.00051989	0.00530993	0.0145834	0.0167104	0.0115888	0.0134434	0.000221554	0.000305171	2.70992e-05	9.48472e-05	220		6.12085	37	0.0435793	0.0305285	1.27667	0.0418621	49.1838	5.69909	0.925978	0.482565	12.9627	0.132251	2.26462	6.43156	0.232046	15.3723	25.4144	20.8553	21.8944	2.6625	0.133197	0.317475	0.011994
JP2	1.54815	1	0.000522621	0.0615541	0.00623468	0.0100123	0.0028482	2.34085	0.000621402	0.000517209	0.00999797	0.00013448	0.00153959	0.00393624	0.000516044	0.00608825	0.0164506	0.0176828	0.0103138	0.0139374	0.000270124	0.000288374	-6.47159e-06	-5.04784e-06	221		6.63843	37	-0.0178285	0.0267833	1.4178	0.0543426	59.5059	6.25867	0.881905	0.511674	13.5533	0.092039	2.29621	6.75907	0.230329	17.6256	28.6683	22.0689	19.4857	2.76035	0.162397	0.3	-0.00286431
JP2	1.57495	1	-0.00218307	0.0547496	0.00645226	0.00854944	0.00259044	2.41186	0.00045577	0.000313118	0.00832044	0.000209673	0.00132334	0.00384798	0.000311926	0.00500471	0.0152468	0.0155693	0.0109876	0.0126765	0.000240402	0.00022305	-6.62264e-06	0.000210997	222		6.75336	37	0.0744724	0.0238225	1.46728	0.046403	54.1205	6.44852	0.646837	0.309767	11.2792	0.143502	1.97368	6.60751	0.139224	14.4887	26.5706	19.4312	20.7587	2.51061	0.144528	0.232043	-0.00293116
JP2	1.53711	1	-0.00113883	0.0439362	0.0063919	0.00924383	0.00266419	2.26368	0.000444043	0.000199761	0.00771991	6.38772e-05	0.00146479	0.00343307	0.000444301	0.0056836	0.0135537	0.0163642	0.0105993	0.0110857	0.000164016	0.000182211	2.8648e-05	0.000240669	223		6.59111	37	0.0388496	0.0191174	1.45355	0.0501719	55.6614	6.05234	0.630195	0.197624	10.4651	0.0437181	2.18465	5.89506	0.198308	16.4541	23.62	20.4233	20.025	2.19555	0.0986053	0.189558	0.0126795
JP2	1.50731	1	-0.000807674	0.0356034	0.00577075	0.00902669	0.00248336	2.32068	0.000195165	0.000265638	0.00821829	0.00013193	0.00157948	0.00355077	0.000575337	0.00649124	0.0136133	0.0158251	0.00963442	0.0111502	0.000161389	0.000351983	-6.34889e-06	2.95858e-05	224		6.46335	37	0.0275527	0.0154916	1.3123	0.0489933	51.8835	6.20474	0.276982	0.262795	11.1407	0.0902941	2.3557	6.09716	0.256794	18.7923	23.7238	19.7505	18.2021	2.20833	0.0970259	0.366173	-0.00281
JP2	1.4409	1	-0.0016725	0.0287936	0.00592995	0.00841901	0.0025811	2.15719	0.000263641	0.000471792	0.00661346	0.000269469	0.00192049	0.00357717	0.000436192	0.00589	0.0139966	0.014305	0.00933653	0.01178	0.000298861	0.000178886	2.81251e-05	9.84378e-05	225		6.17855	37	0.057055	0.0125286	1.34851	0.0456951	53.9256	5.76762	0.374164	0.466743	8.96523	0.184427	2.8643	6.1425	0.194689	17.0517	24.3918	17.8533	17.6393	2.33306	0.179673	0.186098	0.0124481
JP2	1.46072	1	9.38445e-05	0.0199941	0.00669069	0.00764653	0.00240653	2.18487	0.000259677	0.000193167	0.00760084	0.000129652	0.00175585	0.00359128	0.000565401	0.00488469	0.0139223	0.0146341	0.00821084	0.00929349	0.000260426	0.000108313	2.77023e-05	0.000130899	226		6.26354	37	-0.00320138	0.0086998	1.5215	0.0415023	50.2783	5.84162	0.368539	0.1911	10.3037	0.0887347	2.61875	6.16671	0.252359	14.1413	24.2622	18.264	15.5126	1.8406	0.156566	0.11268	0.0122609
JP2	1.32396	1	-0.000105778	0.0110137	0.00745682	0.00739596	0.0019079	2.21767	0.00021546	8.71845e-05	0.00689814	5.89567e-05	0.00151394	0.00287705	0.000442473	0.00521339	0.0119256	0.0132539	0.00748038	0.00912992	0.000151382	0.000297761	-5.95522e-06	2.77513e-05	227		5.67715	37	0.00360847	0.00479225	1.69572	0.0401423	39.8607	5.92934	0.305785	0.0862514	9.35115	0.0403505	2.25795	4.94029	0.197492	15.0929	20.7826	16.5414	14.1325	1.80821	0.0910097	0.309766	-0.00263577
JP2	1.37658	1	-0.000750462	0.0104855	0.00768308	0.00698212	0.00214233	2.23883	5.5341e-05	9.02218e-05	0.00673583	9.45357e-05	0.00163373	0.00324549	0.000659039	0.00552912	0.0130125	0.0125406	0.00626488	0.00770369	0.000156656	7.34593e-05	2.73624e-05	-4.8069e-06	228		5.90275	37	0.025601	0.00456243	1.74718	0.0378962	44.7585	5.98592	0.078541	0.0892563	9.13112	0.0647011	2.43661	5.57294	0.294153	16.0069	22.6769	15.6512	11.8361	1.52574	0.0941804	0.076421	0.0121105
JP2	1.42101	1	0.000582799	0.00611386	0.00799342	0.00817084	0.00193261	2.34827	0.000229965	0.000127631	0.0069127	6.29259e-05	0.00116635	0.00324363	0.000575994	0.0048379	0.0147716	0.0118955	0.0070497	0.00683869	0.000161573	0.000179498	-6.35615e-06	6.41971e-05	229		6.09328	37	-0.0198814	0.00266025	1.81775	0.0443481	40.377	6.27851	0.326371	0.126266	9.37088	0.043067	1.73955	5.56976	0.257087	14.0058	25.7424	14.8461	13.3189	1.35442	0.0971368	0.186734	-0.00281322
JP2	1.37027	1	0.000689689	0.00441226	0.00710818	0.00731109	0.00214432	2.23453	2.14997e-05	0.000154992	0.00630781	0.000192283	0.00167613	0.00276894	0.000682526	0.0053829	0.0134857	0.0117304	0.00624015	0.00669964	0.000121346	0.000336708	-6.07337e-06	-4.73723e-06	230		5.8757	37	-0.0235278	0.00191985	1.61644	0.0396817	44.8	5.9744	0.0305128	0.153334	8.55089	0.1316	2.49985	4.75465	0.304636	15.5836	23.5015	14.64	11.7894	1.32688	0.0729524	0.350283	-0.00268806
JP2	1.41561	1	-0.000214044	0.00605602	0.00684944	0.00620583	0.00166507	2.22368	5.6217e-05	5.75943e-05	0.00670623	0.000164144	0.00138715	0.0038077	0.000362969	0.0053442	0.0128776	0.0111705	0.00612532	0.00642867	9.1024e-05	0.000176789	2.77955e-05	2.91728e-05	231		6.07014	37	0.00730182	0.00263508	1.5576	0.0336828	34.7873	5.94539	0.0797843	0.0569779	9.091	0.112341	2.06885	6.53834	0.162006	15.4716	22.4418	13.9412	11.5725	1.27322	0.054723	0.183917	0.0123022
JP2	1.30037	1	0.000499682	0.00761213	0.00720813	0.0069426	0.00137644	2.20954	0.000156545	5.69253e-05	0.00571884	6.12566e-05	0.00116907	0.00322491	0.000392413	0.00595566	0.0118515	0.0122878	0.00494271	0.00645498	0.000157287	7.37554e-05	-6.18753e-06	-4.82628e-06	232		5.57598	37	-0.017046	0.00331217	1.63917	0.0376817	28.7573	5.90758	0.222171	0.0563161	7.75248	0.0419245	1.7436	5.53761	0.175148	17.2418	20.6536	15.3357	9.33817	1.27843	0.09456	0.076729	-0.00273859
JP2	1.28757	1	-0.000925464	0.00575881	0.00704002	0.00671763	0.0020158	2.11635	8.63329e-05	8.76501e-05	0.00540325	0.00012441	0.00148945	0.00285985	0.000542544	0.00537151	0.0123807	0.010781	0.00543426	0.00663697	5.4482e-05	0.000136504	-5.98703e-06	0.000125608	233		5.52107	37	0.0315709	0.00250576	1.60094	0.0364606	42.115	5.65843	0.122525	0.0867121	7.32466	0.0851476	2.22143	4.91075	0.242157	15.5506	21.5759	13.4551	10.2668	1.31447	0.0327542	0.142008	-0.00264984
JP2	1.33286	1	0.00103656	0.00258701	0.00704145	0.00634085	0.0017723	2.26423	8.88201e-05	0.000358237	0.00599484	0.000161502	0.00153236	0.00307627	0.000524667	0.00505682	0.013677	0.0132052	0.00726754	0.00635872	8.95592e-05	0.000106929	-6.15951e-06	2.87033e-05	234		5.71528	37	-0.0353607	0.00112565	1.60127	0.0344156	37.0277	6.05383	0.126055	0.354403	8.12663	0.110534	2.28543	5.28237	0.234178	14.6396	23.8348	16.4807	13.7304	1.25936	0.0538424	0.11124	-0.00272618
JP2	1.39546	1	0.000169616	0.00259941	0.00689541	0.00544153	0.0017723	2.33976	0.000129683	2.45523e-05	0.00681744	0.000171213	0.00141136	0.00258596	0.000591736	0.00539639	0.0124362	0.0122561	0.0058204	0.00635031	2.38993e-05	4.23135e-05	-6.52986e-06	6.59516e-05	235		5.98372	37	-0.00578621	0.00113105	1.56806	0.0295344	37.0276	6.25575	0.184049	0.0242895	9.24175	0.11718	2.10497	4.44044	0.264113	15.6227	21.6725	15.2962	10.9964	1.2577	0.0143681	0.0440194	-0.0028901
JP2	1.41776	1	0.00113365	0.00373922	0.00614237	0.00614703	0.00141569	2.31155	9.40687e-05	0.000130992	0.00489303	0.000206534	0.00133901	0.00272574	0.000591158	0.00574636	0.0126373	0.0129905	0.00592119	0.0063796	0.000165827	7.776e-05	-6.52349e-06	0.000101375	236		6.07936	37	-0.038673	0.001627	1.39681	0.0333637	29.5772	6.18032	0.133504	0.12959	6.63301	0.141353	1.99706	4.68046	0.263856	16.6358	22.023	16.2127	11.1868	1.2635	0.0996941	0.080895	-0.00288728
JP2	1.32696	1	0.00410228	0.00257577	0.00556888	0.00501231	0.00177497	2.29416	2.14323e-05	2.27643e-05	0.00483788	9.28734e-05	0.00167087	0.00266145	0.000482772	0.00467405	0.0117614	0.0107701	0.00496805	0.00562437	0.000120965	0.000302716	-6.05433e-06	9.40843e-05	237		5.69001	37	-0.139944	0.00112076	1.2664	0.0272049	37.0835	6.13384	0.0304172	0.0225206	6.55825	0.0635634	2.49201	4.57007	0.215479	13.5315	20.4965	13.4416	9.38604	1.11392	0.0727236	0.314921	-0.00267963
JP2	1.36822	1	0.00195051	0.00505616	0.00661609	0.00534309	0.00224545	2.3246	8.89668e-05	0.000224576	0.00516499	0.000228895	0.00103145	0.00261147	0.000424844	0.00506517	0.0152462	0.0135969	0.00677576	0.00741035	0.000156833	0.000644115	-6.16968e-06	0.00012944	238		5.8669	37	-0.0665391	0.00220002	1.50454	0.0290002	46.9129	6.21522	0.126263	0.222173	7.00169	0.156658	1.53834	4.48425	0.189623	14.6638	26.5694	16.9695	12.8013	1.46764	0.0942871	0.670083	-0.00273068
JP2	1.53489	1	-8.84788e-06	0.00906555	0.00600301	0.00611161	0.00256312	2.32022	9.19343e-05	0.000128019	0.0055804	9.77997e-05	0.00134331	0.00325349	0.000543063	0.00519944	0.0179782	0.0203398	0.00925787	0.0088024	0.000335477	0.000700282	-6.37547e-06	6.43923e-05	239		6.58159	37	0.000301833	0.00394458	1.36512	0.0331714	53.5499	6.20351	0.130475	0.126649	7.56481	0.066935	2.00347	5.58669	0.242389	15.0525	31.3305	25.3849	17.4907	1.74334	0.201687	0.728515	-0.00282177
JP2	1.41269	1	0.000131084	0.0141855	0.00608021	0.00657128	0.00291389	2.17446	0.000161499	0.000128177	0.00635159	0.000132646	0.00169222	0.00291026	0.00113406	0.00590071	0.017235	0.0168156	0.00954745	0.0101682	0.000231715	0.000978949	2.8342e-05	2.97464e-05	240		6.05761	37	-0.00447177	0.00617237	1.38268	0.0356663	60.8782	5.81379	0.229202	0.126806	8.61025	0.090784	2.52385	4.99731	0.506174	17.0827	30.0354	20.9866	18.0378	2.01385	0.139306	1.01842	0.0125441
JP2	1.46124	1	-0.000195358	0.0129017	0.00636089	0.00655056	0.00339743	3.2037	9.79812e-05	0.000173404	0.00798157	0.000215124	0.00135774	0.00339356	0.000689674	0.00528268	0.0188646	0.0176404	0.00997806	0.0101949	0.000246652	0.000709379	6.71328e-05	0.000216483	241		6.2658	37	0.00666436	0.00561376	1.4465	0.0355538	70.9806	8.56565	0.139057	0.171548	10.8198	0.147233	2.02499	5.82721	0.307827	15.2935	32.8753	22.016	18.8514	2.01914	0.148285	0.737979	0.0297128
JP2	1.55201	1	0.00243878	0.00672253	0.00540088	0.00689017	0.00402715	2.44132	0.00017682	0.000102318	0.0065736	0.000297309	0.00166267	0.00295824	0.000329179	0.0127779	0.0177277	0.0177634	0.00912139	0.0124644	0.000253698	0.000691625	-6.98894e-06	0.000108608	242		6.655	37	-0.0831955	0.00292509	1.22819	0.0373971	84.137	6.52729	0.250946	0.101223	8.9112	0.203481	2.47977	5.0797	0.146925	36.9922	30.8939	22.1696	17.2329	2.46861	0.152522	0.719509	-0.00309329
JP2	1.50391	1	0.00118638	0.00630485	0.00494104	0.00732537	0.00378523	2.41638	6.13056e-05	9.99458e-05	0.00653298	3.0448e-05	0.00143843	0.00311248	0.000581515	0.00519621	0.0178745	0.0166077	0.0100623	0.0121754	0.000247816	0.000304207	6.74498e-05	6.89517e-05	243		6.44877	37	-0.0404717	0.00274335	1.12362	0.0397592	79.0826	6.46061	0.087006	0.0988762	8.85613	0.0208389	2.14533	5.34456	0.259552	15.0431	31.1497	20.7272	19.0105	2.41137	0.148986	0.316471	0.0298531
JP2	1.47514	1	0.000826575	0.00366052	0.00484152	0.00567772	0.00382579	2.30201	2.35038e-05	9.72021e-05	0.00671482	0.000499157	0.00121835	0.00255713	0.000276601	0.00592078	0.0167325	0.0155006	0.0092797	0.011299	0.000204895	0.000368093	-6.63949e-06	0.000139296	244		6.3254	37	-0.0281975	0.00159275	1.10099	0.0308164	79.9301	6.15484	0.033357	0.0961619	9.10264	0.341627	1.81709	4.39095	0.123457	17.1408	29.1597	19.3454	17.532	2.2378	0.123181	0.382934	-0.00293862
JP2	1.4137	1	0.00201916	0.00243081	0.00423659	0.00454848	0.00351548	2.14885	2.22269e-05	0.000126078	0.00652115	0.000198786	0.000981374	0.0021108	0.000329887	0.00525721	0.0167133	0.0136662	0.00826287	0.0100359	0.00012545	0.000279783	2.78778e-05	6.34157e-05	245		6.06195	37	-0.068881	0.00105769	0.963425	0.0246874	73.4469	5.74534	0.0315448	0.124729	8.8401	0.136051	1.46366	3.62454	0.147241	15.2197	29.1262	17.0561	15.6109	1.98763	0.0754198	0.291063	0.0123386
JP2	1.31277	1	-0.000879492	0.00305688	0.00422633	0.00398776	0.00332167	2.13233	2.25365e-05	0.000162466	0.00650774	0.00027082	0.00109894	0.00266003	0.000334482	0.00512264	0.015593	0.0136138	0.00844722	0.00972507	0.00016183	4.12532e-05	9.75308e-05	9.89314e-05	246		5.62913	37	0.0300027	0.0013301	0.961093	0.021644	69.3978	5.70117	0.0319842	0.160728	8.82192	0.185351	1.63901	4.56764	0.149292	14.8301	27.1738	16.9906	15.9592	1.92608	0.097291	0.0429164	0.0431669
JP2	1.40205	1	0.00180961	0.00105185	0.00429473	0.00494035	0.00278353	2.24397	9.984e-05	2.60332e-05	0.0053066	6.85448e-05	0.000893852	0.00240294	0.000288442	0.00542056	0.016204	0.0143155	0.00782986	0.00854201	0.000176001	0.000120196	-6.92372e-06	0.000107595	247		6.01197	37	-0.0617324	0.000457679	0.976646	0.0268143	58.1548	5.99965	0.141695	0.0257546	7.19365	0.0469127	1.33313	4.12619	0.128742	15.6926	28.2386	17.8664	14.7928	1.69177	0.105811	0.125042	-0.00306442
JP2	1.32256	1	0.00111755	-0.00117163	0.00451853	0.00500876	0.00320734	2.33487	2.42937e-05	6.31361e-05	0.00626813	3.06073e-05	0.00125929	0.00297944	0.000248564	0.00470037	0.0160237	0.014937	0.00675204	0.00786894	0.000174448	-3.01955e-05	-6.86262e-06	0.000143978	248		5.67112	37	-0.0381237	-0.000509796	1.02754	0.0271856	67.0091	6.24269	0.0344781	0.0624605	8.4971	0.0209479	1.87816	5.1161	0.110943	13.6077	27.9244	18.642	12.7565	1.55847	0.104877	-0.0314129	-0.00303738
JP2	1.46493	1	0.00236262	-0.000384392	0.00479089	0.00528221	0.00351382	2.45478	9.91797e-05	2.5861e-05	0.00564566	0.000142923	0.00122468	0.00328541	0.000136871	0.00583408	0.0164714	0.0125349	0.007591	0.00698813	0.000212253	-3.02629e-05	3.0538e-05	0.000106883	249		6.2816	37	-0.0805977	-0.000167256	1.08948	0.0286698	73.4122	6.56329	0.140758	0.0255842	7.65328	0.097818	1.82654	5.6415	0.0610904	16.8898	28.7046	15.6441	14.3415	1.38402	0.127605	-0.031483	0.013516
JP2	1.39606	1	0.00143361	-0.00189323	0.00515028	0.00486019	0.00330639	2.45732	2.39298e-05	9.89639e-05	0.00683653	0.00025079	0.00160816	0.00326577	0.000208068	0.00510839	0.0155255	0.0130195	0.00676122	0.0080824	0.000171835	8.05772e-05	-6.75983e-06	3.15008e-05	250		5.98631	37	-0.0489056	-0.000823776	1.1712	0.0263792	69.0785	6.57007	0.0339616	0.0979048	9.26763	0.171643	2.39848	5.60778	0.0928681	14.7889	27.0563	16.2489	12.7739	1.60074	0.103306	0.0838258	-0.00299188
JP2	1.40743	1	0.000342916	-0.000218709	0.00454816	0.00588281	0.00237481	2.25453	2.27588e-05	-1.08008e-05	0.00611691	0.000133595	0.0013546	0.00335078	0.000267833	0.00601324	0.0140653	0.0112265	0.00674547	0.00772186	0.000163426	4.16601e-05	2.85449e-05	9.99071e-05	251		6.03507	37	-0.0116981	-9.51641e-05	1.03428	0.0319296	49.6156	6.02787	0.0322997	-0.0106852	8.29212	0.0914338	2.0203	5.75374	0.119544	17.4085	24.5114	14.0111	12.7441	1.52934	0.0982506	0.0433397	0.0126339
JP2	1.32127	1	0.00113466	0.00188488	0.00444112	0.00533447	0.00365572	2.31317	5.86328e-05	2.455e-05	0.00635471	0.000206716	0.0011626	0.00375821	-1.21444e-05	0.00536038	0.0163482	0.0128599	0.00635301	0.00787776	0.000237012	-2.87288e-05	6.45091e-05	0.000101465	252		5.66559	37	-0.0387072	0.000820143	1.00994	0.0289534	76.3769	6.18466	0.0832127	0.0242873	8.61448	0.141479	1.73395	6.45336	-0.0054205	15.5184	28.4899	16.0497	12.0026	1.56021	0.14249	-0.029887	0.0285516
JP2	1.23244	1	0.000191814	-0.000207352	0.00451093	0.00521226	0.00344584	2.24178	-1.15809e-05	5.60757e-05	0.00609803	0.000192974	0.00131741	0.00271257	8.81364e-05	0.00533592	0.014896	0.0123037	0.0068929	0.00755299	0.000121782	0.000105812	2.70626e-05	0.000161035	253		5.28469	37	-0.00654348	-9.02225e-05	1.02581	0.0282901	71.992	5.99378	-0.0164358	0.0554756	8.26652	0.132073	1.96485	4.65785	0.0393385	15.4476	25.9591	15.3556	13.0226	1.49589	0.0732145	0.110078	0.0119779
JP2	1.29101	1	9.28214e-05	-0.00220073	0.00456721	0.00467233	0.00392559	2.17703	5.54176e-05	2.32038e-05	0.00640944	0.000128238	0.00089742	0.00274641	5.56645e-05	0.00550321	0.0143419	0.011953	0.00597107	0.00690831	5.61582e-05	6.41808e-06	-6.17123e-06	0.000129472	254		5.53584	37	-0.00316648	-0.000957575	1.03861	0.0253596	82.0152	5.82067	0.0786497	0.0229555	8.68867	0.0877673	1.33845	4.71596	0.0248451	15.9319	24.9935	14.9178	11.281	1.36821	0.0337619	0.00667683	-0.00273137
JP2	1.32309	1	0.00328685	-0.00278467	0.00423104	0.0039964	0.00361321	2.26253	0.000192757	2.35773e-05	0.0067514	0.000130302	0.00118476	0.00323407	0.000261232	0.00528444	0.015051	0.0116671	0.00736447	0.00787265	0.000398181	0.000142969	6.19532e-05	9.74446e-05	255		5.67338	37	-0.112126	-0.00121166	0.962164	0.0216909	75.4888	6.04926	0.273565	0.023325	9.15223	0.0891801	1.767	5.55335	0.116597	15.2986	26.2293	14.5611	13.9136	1.5592	0.239384	0.148733	0.0274203
JP2	1.4009	1	0.00237953	-0.00134552	0.00500089	0.00511314	0.00319761	2.6082	2.34028e-05	-1.11064e-05	0.00744192	0.000245266	0.00081751	0.00319385	0.000131558	0.0044201	0.017057	0.0133448	0.00664828	0.00880385	0.00016805	6.87539e-06	-6.61095e-06	0.000138698	256		6.00704	37	-0.0811743	-0.00058546	1.13723	0.0277521	66.8058	6.97347	0.0332137	-0.0109875	10.0883	0.167862	1.21927	5.48427	0.0587191	12.7963	29.725	16.6549	12.5605	1.74363	0.101031	0.00715258	-0.00292599
JP2	1.37562	1	0.00232855	-0.00159965	0.00440034	0.00415826	0.00362215	2.46055	2.29014e-05	2.43246e-05	0.0058737	0.000204819	0.00132789	0.00397005	0.000234319	0.00534636	0.0151054	0.0107686	0.00671736	0.00808698	0.000270029	6.72809e-06	2.87238e-05	6.53401e-05	257		5.89864	37	-0.0794352	-0.000696035	1.00066	0.0225694	75.6757	6.57871	0.0325021	0.0240643	7.96241	0.14018	1.98047	6.81713	0.104585	15.4778	26.324	13.4396	12.691	1.60165	0.16234	0.00699934	0.0127131
JP2	1.42115	1	0.00270671	-0.0013816	0.00487318	0.00550895	0.00325613	2.37805	-4.72853e-05	2.42224e-05	0.00658532	0.000133868	0.00202322	0.00346274	5.8108e-05	0.00476282	0.0134974	0.00977604	0.0058123	0.00679102	0.000268895	6.69982e-06	-6.44213e-06	6.50655e-05	258		6.09388	37	-0.0923358	-0.00060116	1.10819	0.0299004	68.0285	6.35814	-0.0671081	0.0239632	8.92709	0.0916201	3.01751	5.946	0.0259357	13.7885	23.5219	12.2009	10.9811	1.34498	0.161658	0.00696993	-0.00285127
JP2	1.3763	1	0.00160742	-0.000218355	0.00475031	0.00597805	0.00352394	2.33946	-1.21954e-05	-1.07833e-05	0.00684098	0.000273049	0.00124765	0.00358978	0.000232483	0.0049553	0.0143924	0.0113832	0.00649014	0.00624214	0.000302831	4.15927e-05	-6.41863e-06	6.48282e-05	259		5.90155	37	-0.0548348	-9.50102e-05	1.08025	0.0324465	73.6238	6.25495	-0.0173079	-0.0106679	9.27367	0.186877	1.8608	6.16414	0.103766	14.3457	25.0815	14.2068	12.2617	1.23627	0.18206	0.0432696	-0.00284087
JP2	1.37261	1	0.00332316	-0.00154679	0.0050578	0.00513333	0.00323691	2.32291	5.8774e-05	-1.09956e-05	0.00683323	0.0001004	0.00102298	0.00366044	0.000130245	0.00430479	0.0133562	0.00968253	0.00565586	0.00579535	0.000166374	4.24115e-05	-6.54499e-06	6.61044e-05	260		5.88573	37	-0.113365	-0.000673037	1.15017	0.0278617	67.6269	6.2107	0.0834131	-0.0108779	9.26316	0.0687147	1.52572	6.28548	0.0581332	12.4625	23.2758	12.0842	10.6855	1.14778	0.100023	0.0441214	-0.0028968
JP2	1.30026	1	0.00258338	-0.00164284	0.00484833	0.00475077	0.00369155	2.25886	-4.57287e-05	2.3425e-05	0.00538534	2.77861e-05	0.00138046	0.00270481	0.000191761	0.00409766	0.0101686	0.0067063	0.00423073	0.00473665	0.000158368	4.03708e-05	-6.23007e-06	2.90321e-05	261		5.57551	37	-0.0881285	-0.000714829	1.10254	0.0257853	77.1254	6.03945	-0.064899	0.0231744	7.30039	0.019017	2.05887	4.64453	0.0855901	11.8628	17.7208	8.36976	7.99305	0.938106	0.09521	0.0419984	-0.00275741
JP2	1.432	1	0.00282254	-0.000461717	0.0044473	0.00493812	0.00312289	2.38095	-4.68634e-05	5.87389e-05	0.0054839	0.000167406	0.000928457	0.00259827	0.00019652	0.00350434	0.0103167	0.00659485	0.00384911	0.00461106	0.000231763	6.64005e-06	2.83479e-05	-4.98003e-06	262		6.1404	37	-0.096287	-0.000200901	1.01134	0.0268022	65.2447	6.36588	-0.0665094	0.0581102	7.43399	0.114574	1.38474	4.46158	0.087714	10.1451	17.9789	8.23066	7.27206	0.913233	0.139334	0.00690775	0.0125467
JP2	1.35373	1	0.0030147	-0.000834949	0.0055821	0.00368895	0.00292948	2.41778	0.000130579	-1.1046e-05	0.00604118	6.50924e-05	0.00120651	0.00231769	0.000202378	0.00393072	0.00793884	0.0059323	0.00467958	0.00342475	0.000131368	6.83799e-06	-6.57499e-06	-5.1285e-06	263		5.80479	37	-0.102842	-0.000363301	1.2694	0.0200222	61.204	6.46436	0.185321	-0.0109278	8.18946	0.0445498	1.79944	3.97978	0.0903288	11.3795	13.835	7.40378	8.84104	0.67828	0.0789778	0.00711368	-0.00291008
JP2	1.33942	1	0.00591811	-0.00234001	0.0048853	0.00357201	0.00290623	2.2868	2.25377e-05	-1.06958e-05	0.00505275	0.000132297	0.00123753	0.00283334	0.000299866	0.00377149	0.00862335	0.00453137	0.00324943	0.00355862	9.257e-05	-2.80129e-05	-6.36657e-06	-4.96593e-06	264		5.74342	37	-0.201888	-0.00101818	1.11094	0.0193875	60.7183	6.11415	0.0319859	-0.0105814	6.84953	0.0905455	1.84571	4.86524	0.133841	10.9185	15.0279	5.65535	6.13908	0.704795	0.0556525	-0.0291423	-0.00281783
JP2	1.37164	1	0.00405962	-0.00225324	0.00503722	0.00347987	0.00276241	2.33267	5.85348e-05	-1.09508e-05	0.00481826	9.99915e-05	0.00073514	0.00212042	0.000165175	0.00325858	0.00790591	0.00598758	0.00314924	0.00261513	2.38572e-05	6.77909e-06	-6.51835e-06	0.000101295	265		5.88159	37	-0.138488	-0.000980424	1.14549	0.0188874	57.7134	6.23679	0.0830737	-0.0108336	6.53165	0.0684351	1.09642	3.64105	0.0737237	9.43366	13.7776	7.47276	5.9498	0.517933	0.0143428	0.0070524	-0.00288501
JP2	1.32525	1	0.00139524	-0.00250411	0.00483357	0.00337321	0.00258267	2.27865	5.61683e-05	-1.05081e-05	0.00428319	6.19227e-05	0.00124984	0.00206872	0.000260576	0.0034671	0.0074842	0.00550732	0.0036007	0.00291771	0.000193024	6.50501e-06	2.77714e-05	6.31737e-05	266		5.68265	37	-0.0475967	-0.00108958	1.09918	0.0183084	53.9583	6.09238	0.0797151	-0.0103956	5.80632	0.0423804	1.86406	3.55227	0.116304	10.0373	13.0427	6.87338	6.80274	0.577861	0.116045	0.00676727	0.0122916
JP2	1.37773	1	0.00385968	-7.87662e-05	0.00532742	0.00300203	0.00345297	2.32194	2.29488e-05	-1.0891e-05	0.00458032	0.000134711	0.00101325	0.00189723	0.000129006	0.00355816	0.0081099	0.0059901	0.00306149	0.004082	9.42586e-05	-2.85239e-05	9.93151e-05	6.54754e-05	267		5.90768	37	-0.131668	-3.42725e-05	1.21149	0.0162939	72.141	6.20812	0.0325694	-0.0107744	6.2091	0.0921972	1.5112	3.2578	0.0575801	10.3009	14.1331	7.47592	5.78401	0.808451	0.0566677	-0.0296739	0.0439566
JP2	1.27037	1	0.00386011	-0.00202483	0.00459384	0.00279369	0.00302456	2.25082	0.000192223	2.35119e-05	0.00438412	2.78892e-05	0.00107942	0.00169398	0.000158455	0.00356824	0.00911642	0.0071057	0.00424643	0.00489029	0.000261007	0.000142572	-6.25317e-06	6.31571e-05	268		5.44732	37	-0.131682	-0.000881037	1.04467	0.015163	63.1903	6.01795	0.272806	0.0232603	5.94313	0.0190876	1.6099	2.9088	0.0707244	10.3301	15.8871	8.86823	8.02269	0.968535	0.156916	0.14832	-0.00276764
JP2	1.30069	1	0.00449174	-0.00191899	0.00507195	0.00222221	0.00344736	2.32335	5.81201e-05	-1.08733e-05	0.00503094	6.40745e-05	0.000589097	0.0021054	2.31704e-05	0.00330591	0.0110219	0.00795381	0.00467681	0.0058365	0.000129314	0.000147566	0.000239988	3.01603e-05	269		5.57737	37	-0.153229	-0.000834987	1.15339	0.0120613	72.0238	6.21187	0.0824852	-0.0107569	6.81996	0.0438532	0.878604	3.61526	0.0103418	9.57069	19.2077	9.92671	8.83582	1.15593	0.0777428	0.153515	0.106218
JP2	1.34795	1	0.00415217	-0.000903661	0.00513445	0.00331958	0.00384662	2.61592	-1.24487e-05	6.02777e-05	0.00584178	0.000171792	0.000881496	0.00195313	0.000130383	0.00398822	0.0113362	0.0101209	0.00626814	0.00658563	0.000237835	0.000113741	-6.55193e-06	6.61745e-05	270		5.77999	37	-0.141645	-0.000393199	1.1676	0.0180174	80.3653	6.99413	-0.0176674	0.0596326	7.91914	0.117576	1.3147	3.35379	0.0581948	11.546	19.7556	12.6313	11.8423	1.3043	0.142985	0.118327	-0.00289987
JP2	1.34946	1	0.00361537	-0.000366315	0.00445826	0.00324956	0.00491887	2.40687	-1.24535e-05	-1.10115e-05	0.00516621	0.000136202	0.000739212	0.00220348	0.000237403	0.00391845	0.0120188	0.0119811	0.00780486	0.00919215	0.000344896	6.81664e-06	-6.55446e-06	-5.11248e-06	271		5.78649	37	-0.123333	-0.00015939	1.01383	0.0176373	102.767	6.43518	-0.0176742	-0.0108937	7.00334	0.0932177	1.10249	3.78368	0.105961	11.344	20.9451	14.9529	14.7456	1.82053	0.207349	0.00709147	-0.00290099
JP2	1.36695	1	0.0032631	0.000273274	0.00444126	0.00367601	0.00436813	2.34576	9.26728e-05	2.41643e-05	0.00667476	6.36242e-05	0.000864646	0.00226541	0.000127891	0.00478671	0.0131497	0.0113276	0.00793274	0.00757884	0.00026825	0.000146528	2.85345e-05	2.99483e-05	272		5.86145	37	-0.111316	0.000118906	1.00997	0.0199519	91.2609	6.27181	0.131523	0.0239057	9.04833	0.0435449	1.28957	3.89001	0.0570824	13.8576	22.916	14.1373	14.9872	1.50101	0.16127	0.152436	0.0126293
JP2	1.33842	1	0.00327146	-0.000914167	0.00475208	0.00368065	0.00412404	2.29326	5.72401e-05	5.86424e-05	0.00575264	0.000271157	0.000649528	0.00245495	0.000265548	0.00374131	0.0142927	0.0119986	0.00759017	0.00848853	0.000439435	0.000249358	2.83013e-05	-4.97185e-06	273		5.73914	37	-0.111601	-0.00039777	1.08065	0.0199771	86.1612	6.13142	0.0812362	0.0580148	7.7983	0.185582	0.968734	4.21548	0.118524	10.8312	24.9078	14.9748	14.34	1.68118	0.264186	0.259411	0.0125261
JP2	1.36594	1	0.00483592	-0.000730463	0.00488727	0.00388503	0.00398479	2.34713	5.93012e-05	2.48299e-05	0.00667863	0.000137225	0.000744765	0.00193264	5.95654e-05	0.00470265	0.0135482	0.0104527	0.00624582	0.00825497	9.60178e-05	6.86785e-06	2.93204e-05	3.07732e-05	274		5.85715	37	-0.164971	-0.000317837	1.11139	0.0210864	83.2519	6.27545	0.0841614	0.0245642	9.05357	0.0939179	1.11077	3.3186	0.0265862	13.6143	23.6104	13.0454	11.8001	1.63492	0.0577252	0.00714473	0.0129771
JP2	1.32664	1	0.00300996	-0.00298369	0.00452475	0.00338754	0.00409724	2.14079	2.75117e-05	7.14993e-05	0.00642155	3.46616e-05	0.000495987	0.0018094	0.000154656	0.00253181	0.0110343	0.009889	0.00519305	0.00688152	0.000113	9.26382e-05	3.45062e-05	3.62159e-05	275		5.68863	37	-0.102681	-0.00129826	1.02896	0.0183862	85.6014	5.72378	0.0390451	0.0707341	8.70508	0.0237227	0.739736	3.10698	0.0690286	7.32963	19.2293	12.3419	9.81113	1.3629	0.0679348	0.096373	0.0152723
JP2	1.26099	1	0.00191235	-0.0044252	0.00494576	0.00260291	0.00395036	2.14166	-8.34097e-05	0.000104546	0.00642106	5.06822e-05	0.000972508	0.0016566	0.000102501	0.00413474	0.0108754	0.0103148	0.00555264	0.00709363	0.000288866	-5.00004e-05	-1.13637e-05	0.000114774	276		5.40712	37	-0.0652373	-0.00192548	1.12469	0.0141276	82.5326	5.72611	-0.118377	0.103427	8.70442	0.0346874	1.45044	2.84462	0.0457498	11.9702	18.9525	12.8733	10.4905	1.40491	0.173664	-0.0520162	-0.00502956
JP2	1.35061	1	0.000258388	-0.00725323	0.00495155	0.00421526	0.0046626	2.22869	6.08133e-05	-2.88606e-05	0.00531368	0.000450431	0.000815998	0.00175672	6.15005e-05	0.00297882	0.00952139	0.0111055	0.0044672	0.00735935	0.000623594	1.78661e-05	-1.71789e-05	-1.33995e-05	277		5.79141	37	-0.00881455	-0.00315601	1.12601	0.0228788	97.4132	5.95879	0.0863074	-0.0285517	7.20325	0.308279	1.21701	3.01652	0.0274499	8.62375	16.5929	13.8602	8.43981	1.45754	0.374901	0.0185864	-0.00760334
JP2	1.41579	1	-0.0131757	0.0124487	0.00402682	0.00195028	0.00417324	2.30538	0.000104924	0.000111445	0.00626401	0.000132192	0.00124664	0.00254722	-5.51295e-05	0.00272091	0.0115889	0.010612	0.00641755	0.0044726	0.000753436	3.08251e-05	0.000131599	0.000299359	278		6.07089	37	0.449469	0.00541664	0.915723	0.0105853	87.1892	6.16383	0.14891	0.110252	8.49153	0.0904735	1.85929	4.37392	-0.0246063	7.87708	20.1959	13.2442	12.1246	0.885811	0.452961	0.0320679	0.0582456
JP2	1.32875	1	-0.00657915	-0.015334	0.00449419	0.005091	0.00362431	2.45692	-0.000379601	-8.68842e-05	0.0064284	0.000230657	0.000768512	0.00191249	-9.61933e-05	0.00305957	0.0131847	0.0111988	0.00669629	0.00583469	-9.20559e-05	5.37855e-05	-5.17168e-05	-4.03391e-05	279		5.69765	37	0.224439	-0.00667208	1.02201	0.0276319	75.7208	6.56899	-0.538737	-0.0859544	8.71437	0.157864	1.14619	3.284	-0.0429346	8.8575	22.9769	13.9765	12.6512	1.15558	-0.0553434	0.0559539	-0.0228897
JP2	1.67366	1	-0.0237907	-0.0334333	-0.00108288	0.00700039	0.00474816	2.57435	-0.000186703	-0.000165085	0.00526503	0.000438261	0.000391094	0.00096103	-0.000182773	0.0036751	0.0138259	0.0127253	0.0063086	0.00948255	-0.000174911	-0.000432365	-9.82648e-05	-7.66466e-05	280		7.17663	37	0.811586	-0.0145474	-0.246253	0.0379953	99.2006	6.88297	-0.264973	-0.163318	7.1373	0.29995	0.583294	1.65022	-0.0815781	10.6395	24.0942	15.8817	11.9187	1.87805	-0.105156	-0.449797	-0.0434918
JP3	-0.234184	1	0.051914	-3.2639	-0.00875705	-0.0216313	-0.0169061	-0.9864	-0.0510704	-0.02241	-0.0169381	0.000447986	-0.00808508	-0.00501317	-0.00189861	-0.0170448	-0.095261	-0.11542	-0.0720297	-0.118108	0.000906638	-0.0324576	0.000501317	-0.00243192	1		-1.00418	37	-1.77097	-1.42018	-1.99141	-0.117406	-353.21	-2.63731	-72.48	-22.1701	-22.9614	0.306605	-12.0584	-8.60831	-0.847417	-49.345	-166.011	-144.05	-136.084	-23.3917	0.545065	-33.7662	0.221882
JP3	0.61728	1	-0.00890794	7.14529	0.00178088	0.00233648	0.00789348	1.26318	0.0520109	0.00997801	0.00595411	0.000136671	0.00045042	0.00141068	-5.58569e-05	0.00434376	0.0276198	0.0222761	0.0196956	0.0238773	0.000757633	0.0034245	-2.79284e-05	0.000135483	2		2.64689	37	0.303882	3.10904	0.404983	0.0126815	164.914	3.37734	73.8148	9.87123	8.07141	0.0935389	0.671776	2.42234	-0.024931	12.5753	48.1329	27.8016	37.2105	4.72897	0.455484	3.56257	-0.0123611
JP3	0.615767	1	0.00341802	5.69066	0.00331531	0.00217203	0.00682463	1.15288	0.0392207	0.00729934	0.00350927	-1.06588e-05	0.000951676	0.00108567	0.00052837	0.00461695	0.0183591	0.0160755	0.0121412	0.0155838	0.000254542	0.000772253	-1.19277e-05	-1.11663e-05	3		2.6404	37	-0.116601	2.4761	0.753922	0.0117889	142.583	3.08242	55.6627	7.22122	4.75719	-0.00729496	1.41937	1.86425	0.235831	13.3662	31.9942	20.0629	22.9381	3.08641	0.153029	0.803388	-0.00527916
JP3	0.689813	1	0.00159867	4.95739	0.0033206	0.00236462	0.00537855	1.35818	0.0324911	0.00591588	0.00499725	4.60015e-05	0.000641221	0.00183486	0.000253208	0.00369306	0.018826	0.0169713	0.00984058	0.0120097	9.1803e-05	0.000717423	-9.4003e-06	0.000208807	4		2.95791	37	-0.0545363	2.15704	0.755123	0.0128342	112.371	3.63134	46.1119	5.85257	6.77429	0.0314838	0.956343	3.1507	0.113016	10.6915	32.8079	21.181	18.5916	2.37856	0.0551913	0.746347	-0.00416055
JP3	0.749069	1	0.00245258	3.72835	0.00393183	0.00183088	0.00538135	1.4625	0.0254857	0.00400627	0.00383469	0.000169798	0.000873662	0.00170999	0.000249664	0.00445491	0.0177558	0.0176211	0.00922406	0.0117352	0.000206971	0.000405664	-7.62953e-06	-7.14254e-06	5		3.212	37	-0.0836665	1.62227	0.894121	0.00993729	112.43	3.91024	36.1698	3.96339	5.19832	0.116211	1.30302	2.93628	0.111434	12.897	30.9429	21.9919	17.4269	2.32419	0.12443	0.422019	-0.00337681
JP3	0.862447	1	-0.00147004	3.02494	0.00474986	0.00275056	0.00642344	1.65972	0.0202067	0.00334953	0.00507752	3.55221e-05	0.000705191	0.00171093	0.000321552	0.00503706	0.0202597	0.0150401	0.00932246	0.0107866	0.000280933	0.000301938	-7.25886e-06	-6.79553e-06	6		3.69816	37	0.0501484	1.3162	1.08015	0.0149289	134.201	4.43755	28.6778	3.31369	6.88311	0.0243116	1.05175	2.9379	0.14352	14.5824	35.3065	18.7707	17.6127	2.13631	0.168895	0.314111	-0.00321275
JP3	0.855469	1	-0.00185315	2.06253	0.00547929	0.00322817	0.00445135	1.70202	0.0130969	0.00297321	0.0048664	0.000107457	0.00089825	0.00240653	0.000477863	0.00577447	0.0213145	0.014314	0.00735982	0.00841198	0.000328062	0.000195893	-6.52515e-06	3.16539e-05	7		3.66825	37	0.0632177	0.897441	1.24602	0.0175212	92.9995	4.55064	18.5874	2.94139	6.59691	0.0735444	1.33969	4.13234	0.213288	16.7172	37.1447	17.8645	13.9048	1.66602	0.197229	0.203791	-0.00288802
JP3	0.983203	1	-0.00200847	1.39702	0.00528543	0.00352761	0.00473752	1.88655	0.0102839	0.00199422	0.00512272	0.000148266	0.0013412	0.00272691	0.000642109	0.00581851	0.0203706	0.0124136	0.00616405	0.00827964	0.000103616	0.000122894	-6.66206e-06	-6.23682e-06	8		4.21597	37	0.0685161	0.607869	1.20194	0.0191465	98.9783	5.04402	14.595	1.97288	6.94438	0.101475	2.00032	4.68247	0.286597	16.8447	35.4998	15.4928	11.6456	1.63981	0.0622934	0.127848	-0.00294861
JP3	1.04833	1	0.000320091	0.899463	0.00671207	0.00370231	0.00592811	2.07302	0.00607294	0.00142378	0.00561683	0.000110322	0.0014262	0.00274208	0.000335526	0.00740281	0.0206007	0.0128324	0.00565517	0.00615384	2.66539e-05	-3.15001e-05	-6.69911e-06	-6.27151e-06	9		4.49523	37	-0.0109195	0.391372	1.52636	0.0200947	123.853	5.54257	8.61883	1.40854	7.6142	0.0755051	2.12709	4.70852	0.149757	21.4313	35.9006	16.0154	10.6842	1.21879	0.0160242	-0.0327701	-0.00296501
JP3	1.08587	1	0.000699255	0.555613	0.00680073	0.00444819	0.00453834	2.09467	0.00319207	0.00102024	0.00576003	0.000108635	0.0009081	0.00308231	0.00052128	0.00664026	0.0206301	0.0130565	0.00522514	0.00541077	0.00021713	0.000236218	-6.59671e-06	-6.17564e-06	10		4.65622	37	-0.0238541	0.241757	1.54653	0.024143	94.817	5.60047	4.53024	1.00933	7.80833	0.0743509	1.35438	5.29274	0.232666	19.2237	35.9519	16.2952	9.87176	1.07162	0.130537	0.245742	-0.00291969
JP3	1.18789	1	0.000668662	0.350819	0.00726528	0.00422853	0.00462901	2.28936	0.00187678	0.000645801	0.00462867	0.000109881	0.00161358	0.00327212	0.000643104	0.00640713	0.022492	0.0129356	0.00536231	0.00473877	0.000103777	7.24024e-06	-6.67238e-06	3.23681e-05	11		5.09367	37	-0.0228105	0.152648	1.65217	0.0229508	96.7114	6.121	2.66357	0.63889	6.27464	0.0752038	2.40656	5.61868	0.287041	18.5488	39.1967	16.1442	10.1309	0.938527	0.0623899	0.00753215	-0.00295318
JP3	1.2653	1	4.92643e-05	0.225608	0.00705327	0.00581375	0.00509891	2.40634	0.00152306	0.00039387	0.00501714	0.000115257	0.00132799	0.0033512	0.000634063	0.0076935	0.0243636	0.0126357	0.00550274	0.00622663	0.000270869	8.86021e-05	-6.99882e-06	0.000114959	12		5.42561	37	-0.00168058	0.0981657	1.60395	0.0315547	106.529	6.43378	2.16156	0.389655	6.80125	0.078883	1.98062	5.75447	0.283006	22.2728	42.4584	15.7699	10.3962	1.2332	0.162845	0.0921743	-0.00309766
JP3	1.24101	1	-0.00152495	0.129501	0.00705436	0.00489698	0.00491075	2.23869	0.0010898	0.000141899	0.00445243	0.000146521	0.00143972	0.0028476	0.000634552	0.00636003	0.0218108	0.0132597	0.00635821	0.00604778	0.0002167	7.14396e-06	-6.58365e-06	-6.16342e-06	13		5.32144	37	0.0520215	0.056348	1.6042	0.0265789	102.598	5.98552	1.54667	0.14038	6.03573	0.10028	2.14726	4.88972	0.283224	18.4124	38.0095	16.5487	12.0125	1.19778	0.130279	0.00743198	-0.00291391
JP3	1.24428	1	0.000935912	0.0696442	0.00639025	0.00466976	0.00508985	2.22987	0.00046518	0.000174375	0.00427638	3.12111e-05	0.00124709	0.00323845	0.000356349	0.00660457	0.0203157	0.0138061	0.00505183	0.0059326	0.000173018	6.92071e-06	-6.37791e-06	-5.97081e-06	14		5.33546	37	-0.0319274	0.0303034	1.45318	0.0253456	106.339	5.96194	0.660193	0.172509	5.79708	0.0213611	1.85995	5.56086	0.159051	19.1204	35.404	17.2306	9.54433	1.17497	0.104017	0.00719973	-0.00282285
JP3	1.27287	1	-0.00232858	0.0493649	0.00736235	0.00610008	0.00553254	2.28318	0.000604098	0.000182909	0.00378877	3.27386e-05	0.00123069	0.00324208	0.000567374	0.00615309	0.0219306	0.0158001	0.00618996	0.0070364	0.000181486	-3.14575e-05	-6.69006e-06	0.000109888	15		5.45806	37	0.0794363	0.0214795	1.67424	0.0331088	115.588	6.10448	0.857348	0.180952	5.13608	0.0224066	1.8355	5.56709	0.25324	17.8133	38.2184	19.7193	11.6946	1.39358	0.109108	-0.0327258	-0.002961
JP3	1.25953	1	0.000896957	0.0303531	0.00561305	0.00597602	0.00691352	2.30168	0.000176844	-1.05937e-05	0.00487424	7.09069e-05	0.00175911	0.00306351	0.000601438	0.00599059	0.0218779	0.0135627	0.00741105	0.00940397	0.000141673	7.20369e-06	-6.6387e-06	3.22047e-05	16		5.40085	37	-0.0305985	0.0132072	1.27644	0.0324355	144.44	6.15395	0.25098	-0.0104803	6.60754	0.0485293	2.62362	5.26046	0.268444	17.3429	38.1265	16.9268	14.0016	1.86248	0.0851726	0.00749412	-0.00293827
JP3	1.28798	1	0.00034908	0.0324289	0.0077295	0.00668965	0.00700502	2.26689	0.000248747	2.72846e-05	0.00481706	0.000144871	0.00206393	0.00311691	0.000288358	0.0064391	0.023491	0.0155625	0.00771928	0.0104269	0.000176588	8.24077e-05	-6.50952e-06	3.15781e-05	17		5.52285	37	-0.0119084	0.0141104	1.75773	0.0363088	146.352	6.06091	0.353026	0.0269926	6.53003	0.0991512	3.07823	5.35216	0.128705	18.6413	40.9376	19.4226	14.5839	2.06507	0.106164	0.0857301	-0.0028811
JP3	1.28846	1	0.000266428	0.0155001	0.00776487	0.00542489	0.00727876	2.18785	9.57036e-05	0.000100164	0.00459109	0.000104625	0.0016467	0.002895	0.000281434	0.00554877	0.0221529	0.0158517	0.00889542	0.0113906	6.20451e-05	4.36614e-05	-6.35321e-06	3.08198e-05	18		5.52493	37	-0.00908882	0.00674437	1.76578	0.0294442	152.071	5.8496	0.135824	0.0990924	6.2237	0.0716064	2.45595	4.9711	0.125614	16.0638	38.6058	19.7836	16.806	2.25593	0.0373011	0.0454217	-0.00281191
JP3	1.30761	1	-0.00127581	0.0385048	0.00664082	0.00610917	0.00802073	2.21885	0.000131357	6.28638e-05	0.00480769	6.72871e-05	0.00174223	0.00290711	0.000388442	0.00531982	0.0196647	0.0143308	0.00896646	0.0120608	9.79817e-05	0.000189128	3.01585e-05	0.000139936	19		5.60703	37	0.0435226	0.0167541	1.51016	0.0331582	167.573	5.93249	0.186425	0.062191	6.51733	0.0460519	2.59843	4.99191	0.173376	15.401	34.2695	17.8855	16.9402	2.38867	0.058906	0.196753	0.0133481
JP3	1.3373	1	0.00127709	0.0812887	0.00727923	0.00621788	0.00935311	2.24408	0.00106137	0.000175304	0.00470771	0.000216913	0.00143926	0.00203079	0.00032114	0.0041521	0.0191968	0.0163324	0.0092377	0.0146892	0.000396582	0.0002296	3.06952e-05	0.000290854	20		5.73435	37	-0.0435661	0.0353701	1.65534	0.0337482	195.409	5.99993	1.50632	0.173428	6.38179	0.148457	2.14658	3.48715	0.143336	12.0204	33.4541	20.3836	17.4526	2.90923	0.238422	0.238857	0.0135856
JP3	1.34802	1	0.000927058	0.112745	0.00693259	0.00483586	0.0109057	2.09392	0.000548611	0.000271591	0.00439046	0.00045166	0.00139893	0.00255717	0.000550421	0.00375851	0.0179434	0.0151238	0.00871801	0.0129687	9.44945e-05	0.000147236	2.90852e-05	0.000170116	21		5.78029	37	-0.0316253	0.0490575	1.57651	0.0262471	227.847	5.59845	0.778599	0.268684	5.95173	0.30912	2.08643	4.39101	0.245673	10.881	31.2698	18.8752	16.4708	2.56848	0.0568095	0.153172	0.012873
JP3	1.2924	1	0.000538918	0.119096	0.00595873	0.00583321	0.0122346	2.107	0.000937274	6.07492e-05	0.00584457	0.000205952	0.00136653	0.00213957	0.000481072	0.00461204	0.0172385	0.0132491	0.00855916	0.0122191	0.000235614	0.000147534	9.9608e-05	0.000135229	22		5.54181	37	-0.0183845	0.0518209	1.35505	0.0316604	255.61	5.63344	1.3302	0.0600991	7.92292	0.140955	2.03811	3.67393	0.21472	13.3519	30.0414	16.5355	16.1707	2.42003	0.141649	0.153482	0.0440863
JP3	1.3807	1	0.0020002	0.113478	0.00789091	0.00460264	0.0161903	2.21443	0.000902185	0.000209908	0.00630311	0.000397706	0.00211903	0.00241023	0.000354025	0.00329643	0.0157748	0.0136427	0.00824803	0.0129382	0.000208559	0.000116885	0.000103673	0.000287426	23		5.92041	37	-0.0682341	0.0493764	1.79444	0.0249813	338.256	5.92068	1.2804	0.207661	8.54452	0.272193	3.16041	4.13869	0.158014	9.54323	27.4906	17.0268	15.5829	2.56244	0.125385	0.121597	0.0458854
JP3	1.43299	1	-0.000780823	0.0946451	0.00668822	0.00547099	0.0210552	2.31186	0.000918562	0.000101712	0.0064922	0.000404925	0.00182148	0.00264066	0.000323117	0.00387897	0.0145278	0.0126191	0.00806137	0.0138081	2.56681e-05	-3.03351e-05	6.82196e-05	0.000143302	24		6.14465	37	0.0266367	0.0411817	1.52094	0.0296943	439.895	6.18117	1.30364	0.100623	8.80085	0.277134	2.71663	4.53438	0.144219	11.2297	25.3175	15.7492	15.2302	2.73474	0.0154315	-0.0315581	0.0301938
JP3	1.46466	1	0.000691672	0.0659858	0.00668922	0.00549583	0.020917	2.36723	0.000438158	2.73502e-05	0.0061511	0.000409559	0.00218218	0.00168905	0.000213526	0.00430098	0.0136733	0.0117806	0.00841795	0.0121902	0.000403589	0.000158131	6.90002e-05	0.000295993	25		6.28044	37	-0.0235955	0.0287116	1.52117	0.0298292	437.008	6.32921	0.621843	0.0270575	8.33846	0.280306	3.2546	2.90033	0.0953044	12.4514	23.8284	14.7027	15.9039	2.41429	0.242635	0.164507	0.0305393
JP3	1.44689	1	0.00115386	0.0490584	0.00709884	0.00413475	0.0212422	2.25028	0.000499927	6.33692e-05	0.00653801	0.000325088	0.00135197	0.00186432	0.000501819	0.00326665	0.0135276	0.0117227	0.00771439	0.0106134	0.000245775	-2.98605e-05	6.71524e-05	0.000141061	26		6.20425	37	-0.0393623	0.0213462	1.61432	0.0224418	443.802	6.01652	0.709506	0.062691	8.86296	0.222493	2.01638	3.2013	0.22398	9.45701	23.5745	14.6305	14.5746	2.10202	0.147758	-0.0310644	0.0297215
JP3	1.42775	1	0.00112557	0.0356972	0.00541	0.0035362	0.0228162	2.43395	0.000244506	0.000100879	0.00525373	0.0005127	0.00139924	0.00147112	0.000431561	0.00336583	0.0122585	0.0102174	0.00714295	0.0103972	0.000469816	4.39729e-05	3.06313e-05	6.80695e-05	27		6.1222	37	-0.0383972	0.0155325	1.23026	0.0191931	476.686	6.50758	0.347007	0.0997994	7.12197	0.350896	2.08688	2.52611	0.192621	9.74413	21.3629	12.7518	13.495	2.0592	0.28245	0.0457458	0.0135573
JP3	1.47391	1	0.00137426	0.0273326	0.00602466	0.00405658	0.0243517	2.22966	0.000279098	0.000246842	0.00465723	0.000324715	0.0013137	0.00175206	0.000354406	0.00274897	0.0125198	0.0095412	0.00704439	0.0101604	0.000318911	0.00015372	3.03661e-05	0.000140899	28		6.32013	37	-0.0468809	0.0118929	1.37004	0.0220175	508.766	5.96138	0.396101	0.244201	6.31337	0.222238	1.95931	3.00852	0.158184	7.95832	21.8183	11.9078	13.3088	2.01229	0.191727	0.159917	0.0134399
JP3	1.46039	1	0.00175225	0.0249262	0.00535031	0.00355809	0.025452	2.23646	0.000202402	0.000242909	0.00537812	0.00031954	0.0020875	0.00125452	0.000457131	0.00266904	0.0122842	0.00942529	0.00631767	0.00895049	0.000349954	-2.9351e-05	-6.24206e-06	0.000102529	29		6.26212	37	-0.0597757	0.0108458	1.21669	0.0193119	531.754	5.97956	0.287253	0.24031	7.2906	0.218696	3.11339	2.15418	0.204034	7.72693	21.4076	11.7632	11.9359	1.77267	0.21039	-0.0305343	-0.00276272
JP3	1.49296	1	0.000335568	0.0256829	0.00474722	0.00374799	0.0266798	2.26621	0.00016669	0.000497009	0.00506554	0.000356547	0.00173054	0.00129385	5.99127e-05	0.00296537	0.0115531	0.0101737	0.00597085	0.00991462	0.000387036	0.000115432	-6.25755e-06	6.65697e-05	30		6.4018	37	-0.0114475	0.0111751	1.07955	0.0203426	557.405	6.05911	0.23657	0.49169	6.86686	0.244024	2.58101	2.22171	0.0267412	8.58482	20.1336	12.6972	11.2806	1.96362	0.232684	0.120086	-0.00276958
JP3	1.62046	1	-0.000822548	0.0296795	0.00499329	0.00388302	0.0264344	2.37806	0.000172696	0.000477397	0.0057733	0.000256837	0.00168034	0.00115287	0.000287183	0.00288462	0.0122324	0.00918806	0.00629852	0.00865778	0.000213387	7.03474e-06	-6.483e-06	3.14494e-05	31		6.94852	37	0.0280601	0.0129141	1.1355	0.0210755	552.279	6.35815	0.245094	0.472288	7.82631	0.175782	2.50613	1.97964	0.12818	8.35103	21.3173	11.4671	11.8997	1.7147	0.128287	0.00731836	-0.00286936
JP3	1.56138	1	-0.000471289	0.0256671	0.00454234	0.00382581	0.0263083	2.31732	0.000278333	0.0003926	0.00581667	0.000250607	0.00160297	0.000941864	0.000426652	0.00219231	0.0114224	0.00830587	0.00669524	0.00844778	0.000427863	8.00813e-05	-6.32575e-06	3.06866e-05	32		6.69519	37	0.0160774	0.0111682	1.03295	0.020765	549.645	6.19576	0.395015	0.388399	7.88511	0.171518	2.39074	1.61731	0.19043	6.34677	19.9058	10.3661	12.6492	1.67311	0.257228	0.0833099	-0.00279976
JP3	1.49269	1	0.00066248	0.0207209	0.00427077	0.00294726	0.0286102	2.23888	0.000130314	0.000387885	0.00560178	0.000428442	0.00122203	0.000749707	0.000168345	0.0030702	0.0106696	0.00827845	0.00513118	0.00758641	0.000531231	-2.93872e-05	-6.24978e-06	6.6487e-05	33		6.40063	37	-0.0225996	0.009016	0.971197	0.0159965	597.738	5.98602	0.184945	0.383734	7.59379	0.29323	1.82259	1.28735	0.0751385	8.88828	18.5939	10.3319	9.69425	1.50251	0.319373	-0.030572	-0.00276614
JP3	1.50505	1	0.00223984	0.0149543	0.0048282	0.00368065	0.0266555	2.14214	0.000267772	0.000272045	0.00541953	0.000205879	0.0012604	0.000976567	0.000199146	0.00228522	0.0108481	0.00809639	0.00489085	0.00625991	0.00034119	-2.86159e-05	-6.08574e-06	6.47419e-05	34		6.45365	37	-0.0764089	0.00650687	1.09796	0.0199771	556.898	5.72738	0.380028	0.269134	7.34674	0.140906	1.87981	1.6769	0.0888862	6.61576	18.905	10.1047	9.24019	1.23979	0.205121	-0.0297696	-0.00269353
JP3	1.50349	1	0.0022043	0.0125026	0.00458101	0.00357414	0.0299806	2.08364	0.00023252	0.000131149	0.0062294	0.000311494	0.00118979	0.00125815	0.000199118	0.00221447	0.00950705	0.00767231	0.00450244	0.00583645	0.000446785	4.18173e-05	-6.08488e-06	9.99473e-05	35		6.44695	37	-0.0751968	0.00544011	1.04175	0.019399	626.367	5.57098	0.329997	0.129745	8.4446	0.213189	1.7745	2.16041	0.0888736	6.41093	16.5679	9.57539	8.50638	1.15593	0.268604	0.0435033	-0.00269315
JP3	1.68396	1	0.0014109	0.00859745	0.00426133	0.00299567	0.0334134	2.26703	9.80998e-05	0.000291113	0.00696846	0.000182621	0.00161255	0.00104501	0.00028848	0.00301071	0.0117592	0.00738132	0.00436643	0.00639716	0.000440479	-3.06216e-05	3.11758e-05	3.15915e-05	36		7.22081	37	-0.048131	0.0037409	0.969051	0.0162593	698.087	6.0613	0.139225	0.287997	9.44647	0.124987	2.40502	1.79443	0.128759	8.71607	20.4927	9.21222	8.24942	1.26697	0.264813	-0.0318561	0.0137983
JP3	1.62223	1	0.00520129	0.00611392	0.00501465	0.00291349	0.0310062	2.246	2.23819e-05	0.000175371	0.00738372	0.000439723	0.000994358	0.000955053	6.14138e-05	0.00296543	0.0105419	0.00715895	0.00385494	0.00574375	0.000396733	6.96023e-06	-6.41433e-06	3.11163e-05	37		6.9561	37	-0.177435	0.00266027	1.14036	0.0158133	647.794	6.00506	0.0317649	0.173494	10.0094	0.30095	1.48303	1.63996	0.0274112	8.58498	18.3712	8.93469	7.28306	1.13757	0.238513	0.00724085	-0.00283897
JP3	1.6333	1	0.00244696	0.00490378	0.00407977	0.00302988	0.0311616	2.18534	5.88794e-05	0.000100068	0.00862977	0.000361649	0.000947202	0.00142256	0.000281163	0.00289761	0.0118286	0.00723083	0.00432914	0.0048387	0.000355842	4.36194e-05	3.0385e-05	6.75222e-05	38		7.00359	37	-0.0834745	0.00213372	0.927764	0.016445	651.041	5.84288	0.0835627	0.098997	11.6986	0.247516	1.4127	2.44273	0.125493	8.38864	20.6137	9.02439	8.17897	0.958318	0.21393	0.045378	0.0134483
JP3	1.68097	1	0.00142531	0.000325544	0.00471113	0.00305797	0.034136	2.21795	2.23526e-05	6.39231e-05	0.0078193	0.00032793	0.000807693	0.00113917	0.000135479	0.00233131	0.0100087	0.0064819	0.00321929	0.00421589	0.000507432	6.95113e-06	-6.40594e-06	-5.99705e-06	39		7.20797	37	-0.0486224	0.00014165	1.07134	0.0165975	713.185	5.93007	0.0317233	0.063239	10.5999	0.224438	1.20463	1.95611	0.0604691	6.7492	17.4421	8.0897	6.08214	0.834968	0.305065	0.00723137	-0.00283525
JP3	1.64745	1	0.00123415	0.000398667	0.00391855	0.00308427	0.0319727	2.22534	-1.46688e-05	2.67569e-05	0.00805105	0.000289844	0.000989599	0.00102437	0.000282781	0.0025818	0.00938199	0.00627424	0.00324502	0.00420121	0.000173173	-3.00167e-05	-6.38363e-06	-5.97617e-06	40		7.06423	37	-0.0421013	0.000173467	0.8911	0.0167402	667.988	5.94984	-0.0208182	0.0264706	10.914	0.198372	1.47593	1.75898	0.126216	7.47437	16.3499	7.83054	6.13076	0.832061	0.10411	-0.0312268	-0.00282538
JP3	1.63049	1	0.00204238	0.00058173	0.00448869	0.00354805	0.0315995	2.2192	9.57073e-05	-1.01385e-05	0.00893294	0.000545856	0.00105846	0.000872451	0.000244675	0.00249606	0.0103683	0.0066494	0.00326645	0.00436519	0.000540043	-2.98747e-05	-6.35345e-06	-5.94791e-06	41		6.99152	37	-0.0696729	0.000253121	1.02075	0.0192574	660.19	5.93342	0.13583	-0.01003	12.1095	0.373589	1.57863	1.49812	0.109208	7.22613	18.0687	8.29875	6.17124	0.864538	0.324671	-0.0310792	-0.00281202
JP3	1.61399	1	0.000635105	-0.000931543	0.00396359	0.00243812	0.0325538	2.17697	0.000132144	-1.01131e-05	0.00821295	0.000471134	0.00101913	0.000980293	0.000170709	0.00292992	0.00931422	0.00611889	0.00351536	0.00439092	0.000575366	6.87689e-06	-6.33752e-06	-5.933e-06	42		6.92077	37	-0.0216657	-0.00040533	0.901344	0.0132331	680.128	5.8205	0.187541	-0.0100048	11.1335	0.322448	1.51997	1.6833	0.0761935	8.48217	16.2318	7.63665	6.64151	0.869634	0.345906	0.00715414	-0.00280497
JP3	1.70337	1	0.00228322	-0.000889587	0.00354024	0.00235178	0.0356056	2.26096	2.19925e-05	-1.00575e-05	0.00922637	0.000322646	0.000831154	0.000756058	0.000206246	0.00291383	0.0108698	0.00524599	0.00309446	0.00352788	0.00038983	-2.96362e-05	3.01726e-05	3.05749e-05	43		7.30405	37	-0.0778889	-0.000387075	0.80507	0.0127645	743.889	6.04507	0.0312121	-0.0099499	12.5073	0.220822	1.23962	1.29826	0.0920553	8.4356	18.9428	6.54723	5.84631	0.698706	0.234363	-0.030831	0.0133543
JP3	1.7192	1	0.00167435	-0.00222953	0.00349909	0.00322035	0.0345983	2.2078	2.21942e-05	-1.01498e-05	0.00912696	0.000436035	0.000875589	0.000836614	0.000244948	0.00286694	0.0107851	0.00595707	0.00367537	0.00367067	0.000687886	6.90186e-06	-6.36054e-06	-5.95455e-06	44		7.37192	37	-0.0571181	-0.000970108	0.795714	0.0174788	722.843	5.90294	0.0314985	-0.0100412	12.3725	0.298426	1.30589	1.43658	0.109329	8.29985	18.7951	7.43468	6.94381	0.726986	0.413552	0.00718012	-0.00281516
JP3	1.72308	1	0.00161297	-0.00314196	0.00382348	0.00276306	0.0377845	2.22164	5.94693e-05	-1.02298e-05	0.0110558	0.000476573	0.00129059	0.000806109	0.000209779	0.00366901	0.0107217	0.00596692	0.00307327	0.00381091	0.000767508	4.40564e-05	-6.41068e-06	0.000105299	45		7.38854	37	-0.0550244	-0.00136712	0.869481	0.0149968	789.41	5.93994	0.0843999	-0.0101203	14.9872	0.32617	1.92484	1.3842	0.0936321	10.6219	18.6847	7.44699	5.80627	0.75476	0.461421	0.0458326	-0.00283735
JP3	1.69737	1	-0.000137045	0.00168863	0.00373933	0.00246067	0.0339566	2.15777	2.16666e-05	2.60264e-05	0.0120036	0.00028193	0.00110632	0.00114014	0.000203191	0.003985	0.0107088	0.00538388	0.00344426	0.00322406	0.000707468	7.86076e-05	-6.20934e-06	6.60568e-05	46		7.27831	37	0.00467512	0.00073475	0.850345	0.0133556	709.436	5.76917	0.0307497	0.0257478	16.2722	0.192956	1.65001	1.95778	0.0906914	11.5367	18.6621	6.71932	6.50718	0.638535	0.425325	0.0817768	-0.00274824
JP3	1.70317	1	0.000260493	-4.56097e-05	0.0038849	0.00264135	0.0359603	2.06205	-1.42737e-05	-9.91227e-06	0.0122961	0.000497728	0.000998893	0.00128437	0.000311113	0.00449015	0.0113966	0.00642914	0.00380505	0.00365667	0.000707736	-2.92082e-05	-6.21169e-06	-5.8152e-06	47		7.30316	37	-0.00888637	-1.98456e-05	0.883448	0.0143362	751.298	5.51324	-0.0202575	-0.00980619	16.6687	0.34065	1.48979	2.20543	0.138861	12.9991	19.8607	8.02386	7.18881	0.724213	0.425486	-0.0303857	-0.00274928
JP3	1.62963	1	0.00191985	-0.00115574	0.00394255	0.0024013	0.0346089	2.06183	-4.82866e-05	2.50328e-05	0.0131028	0.00030573	0.000925832	0.00113118	0.00026456	0.00435166	0.0118224	0.00538606	0.00275942	0.00344661	0.000749586	6.48057e-06	-5.97229e-06	9.8098e-05	48		6.98783	37	-0.065493	-0.000502884	0.896559	0.0130333	723.064	5.51266	-0.0685292	0.0247649	17.7622	0.209245	1.38082	1.94239	0.118083	12.5981	20.6029	6.72205	5.21331	0.682611	0.450646	0.00674184	-0.00264332
JP3	1.67002	1	0.00121006	-0.000956227	0.00289955	0.00316895	0.0373652	2.18185	-5.06049e-05	-9.98781e-06	0.0139858	0.000501521	0.00129628	0.00100437	0.000204817	0.00405311	0.0126802	0.00665925	0.00263834	0.00372075	0.000314683	7.92366e-05	-6.25903e-06	-5.85951e-06	49		7.16104	37	-0.0412794	-0.000416071	0.659374	0.0171998	780.649	5.83356	-0.0718194	-0.00988092	18.9592	0.343245	1.93333	1.72465	0.0914171	11.7338	22.0977	8.31104	4.98457	0.736906	0.189185	0.0824312	-0.00277023
JP3	1.69787	1	-0.000829025	-9.71921e-06	0.00365473	0.00316388	0.0371231	2.18814	2.18051e-05	6.23572e-05	0.0159554	0.000356061	0.00107722	0.0010751	0.000312983	0.00426398	0.0127684	0.00668476	0.0030681	0.00411261	0.000675824	6.78085e-06	2.99155e-05	0.000138808	50		7.28044	37	0.028281	-4.229e-06	0.831106	0.0171723	775.593	5.85038	0.0309462	0.0616898	21.6291	0.243691	1.60662	1.84609	0.139696	12.3443	22.2514	8.34288	5.7965	0.814514	0.406301	0.00705423	0.0132405
JP3	1.84008	1	0.00189659	-0.00137879	0.00534081	0.00325701	0.0381545	2.29896	-5.14232e-05	-1.01493e-05	0.016645	0.000767289	0.00117001	0.00120466	0.000134512	0.00459753	0.0123692	0.00555153	0.00304909	0.00363369	0.00101913	6.90154e-06	-6.36024e-06	3.08539e-05	51		7.89026	37	-0.0646996	-0.000599935	1.21453	0.0176777	797.141	6.14666	-0.0729808	-0.0100407	22.564	0.525139	1.74501	2.06856	0.0600378	13.3099	21.5557	6.92855	5.76059	0.719662	0.612692	0.00717979	-0.00281503
JP3	1.81338	1	0.000119118	-0.00179099	0.00402691	0.00323006	0.0381227	2.27992	5.91822e-05	-1.01804e-05	0.0191737	0.000252746	0.00143205	0.00117143	0.000319529	0.00568269	0.012814	0.00593812	0.00331725	0.00364482	0.000948408	-2.99983e-05	-6.37973e-06	-5.97251e-06	52		7.77576	37	-0.00406354	-0.000779291	0.915743	0.0175315	796.475	6.09577	0.0839924	-0.0100715	25.992	0.172981	2.13581	2.0115	0.142618	16.4515	22.3308	7.41103	6.26721	0.721867	0.570176	-0.0312077	-0.00282365
JP3	1.75987	1	0.000759877	-0.00169199	0.00470424	0.00365032	0.0377422	2.09175	2.14733e-05	-9.82012e-06	0.0174249	0.000350644	0.00138136	0.00123681	0.000308221	0.00501859	0.0126457	0.00440952	0.00270089	0.0031953	0.000558699	6.67768e-06	2.94604e-05	6.54675e-05	53		7.5463	37	-0.0259222	-0.000736214	1.06977	0.0198125	788.526	5.59265	0.0304753	-0.00971502	23.6213	0.239984	2.06022	2.12377	0.13757	14.5289	22.0376	5.50327	5.10274	0.632838	0.335886	0.0069469	0.0130391
JP3	1.73122	1	0.00156407	-0.00139154	0.00450753	0.00342121	0.0358512	2.03162	2.07324e-05	-9.48128e-06	0.0168581	0.000338545	0.00167755	0.00129729	0.000331971	0.00446684	0.0109354	0.0055647	0.00305471	0.00263804	0.00112397	-2.79382e-05	2.84438e-05	2.88231e-05	54		7.42346	37	-0.053356	-0.000605481	1.02504	0.018569	749.019	5.43188	0.0294238	-0.00937981	22.8529	0.231703	2.50197	2.22763	0.148171	12.9316	19.0571	6.945	5.7712	0.52247	0.675726	-0.0290645	0.0125892
JP3	1.79272	1	0.00243963	-0.001114	0.00421405	0.00298419	0.0373717	2.1195	-1.45412e-05	-1.0098e-05	0.0178078	0.000397189	0.00171343	0.00145492	0.000207077	0.00413446	0.0122701	0.00610979	0.00237448	0.00299275	0.000647755	6.86666e-06	3.02941e-05	-5.92418e-06	55		7.68716	37	-0.0832247	-0.000484721	0.958301	0.016197	780.787	5.66686	-0.0206371	-0.00998996	24.1404	0.27184	2.55549	2.4983	0.092426	11.9693	21.383	7.62529	4.48606	0.592722	0.389426	0.0071435	0.0134081
JP3	1.7772	1	0.00141171	-0.00115403	0.00477672	0.0034698	0.0379883	2.14934	5.88585e-05	2.65943e-05	0.0181494	0.00080215	0.00157109	0.00127518	0.000134187	0.00517427	0.0126701	0.00531777	0.00315186	0.00322098	0.00101666	8.0323e-05	3.03742e-05	-5.93985e-06	56		7.62063	37	-0.0481586	-0.00050214	1.08625	0.0188327	793.669	5.74665	0.0835331	0.0263097	24.6035	0.548998	2.34319	2.18965	0.0598924	14.9796	22.0801	6.63681	5.95475	0.637924	0.611209	0.0835613	0.0134436
JP3	1.8804	1	0.000120775	-0.00106347	0.00378308	0.00353742	0.0379369	2.28571	6.00055e-05	-1.0322e-05	0.0192155	0.000293697	0.00118993	0.00133746	0.000211671	0.00415131	0.0133669	0.0063202	0.00332559	0.00328375	0.000924167	-3.04156e-05	3.09661e-05	6.88136e-05	57		8.06312	37	-0.00412007	-0.000462734	0.860295	0.0191997	792.594	6.11124	0.0851609	-0.0102116	26.0486	0.201008	1.7747	2.2966	0.0944763	12.0181	23.2945	7.88789	6.28297	0.650355	0.555603	-0.0316419	0.0137055
JP3	1.89876	1	0.000832569	-0.0025562	0.00477227	0.00404267	0.0388831	2.23386	-1.47935e-05	6.4242e-05	0.0199458	0.00025505	0.00125881	0.00133114	0.000173412	0.00439286	0.0112147	0.00506007	0.00334749	0.00289565	0.000919797	8.1501e-05	-6.4379e-06	-6.02697e-06	58		8.14185	37	-0.028402	-0.00111225	1.08524	0.021942	812.362	5.97261	-0.0209952	0.0635545	27.0386	0.174559	1.87745	2.28575	0.0774002	12.7174	19.5438	6.3152	6.32436	0.573491	0.552976	0.0847869	-0.0028494
JP3	1.81521	1	-0.000101003	-0.00152485	0.00510087	0.00443381	0.0375716	2.08485	-1.42531e-05	-9.89799e-06	0.0188938	0.000245734	0.00146411	0.00156969	0.000167078	0.00398077	0.0110926	0.006851	0.00369188	0.00325653	0.000599026	-2.91661e-05	-6.20274e-06	0.000101883	59		7.78361	37	0.00344558	-0.000663487	1.15997	0.024065	784.962	5.57421	-0.0202283	-0.00979206	25.6125	0.168183	2.18364	2.69537	0.0745731	11.5244	19.331	8.55035	6.975	0.644966	0.360131	-0.030342	-0.00274532
JP3	1.74785	1	0.00146788	-0.000934725	0.00386189	0.00359376	0.0371669	2.07978	2.13489e-05	-9.76322e-06	0.018991	0.000454836	0.00186907	0.00140668	5.85793e-05	0.00467048	0.0106225	0.00640328	0.00268524	0.00374331	0.000874133	6.63899e-06	2.92896e-05	2.96802e-05	60		7.49477	37	-0.0500748	-0.000406715	0.878215	0.0195055	776.507	5.56064	0.0302988	-0.00965873	25.7443	0.311294	2.78761	2.41547	0.0261461	13.5211	18.5118	7.99158	5.07317	0.741373	0.525523	0.00690665	0.0129635
JP3	1.75027	1	-0.000310541	0.0012617	0.00386497	0.00366965	0.0372123	2.05573	2.11718e-05	-9.68224e-06	0.0168636	0.000170149	0.00150243	0.00150036	0.000128322	0.00375354	0.010921	0.00814241	0.00434916	0.00480116	0.00121803	6.58393e-06	-6.06754e-06	6.45483e-05	61		7.50514	37	0.0105937	0.000548987	0.878917	0.0199174	777.455	5.49634	0.0300475	-0.00957862	22.8603	0.116452	2.24078	2.57632	0.0572748	10.8666	19.032	10.1621	8.21678	0.950883	0.732269	0.00684937	-0.00268548
JP3	1.66284	1	0.00041753	-0.00110294	0.00469654	0.00379244	0.0365574	1.99782	2.05067e-05	2.46331e-05	0.0162658	0.000402882	0.00186336	0.00131718	0.000124291	0.00366963	0.010646	0.00839711	0.00475704	0.00594309	0.00083965	-2.7634e-05	-5.87692e-06	9.65316e-05	62		7.13022	37	-0.0142435	-0.000479907	1.06802	0.0205839	763.774	5.34152	0.0291035	0.0243694	22.0499	0.275736	2.77909	2.26178	0.0554755	10.6237	18.5527	10.48	8.98739	1.17705	0.504792	-0.0287482	-0.00260111
JP3	1.85185	1	0.00343998	-0.00255327	0.00403676	0.00482371	0.0369085	2.197	-1.45621e-05	-1.01126e-05	0.0159602	0.000397762	0.00167923	0.0019338	0.000134026	0.00432416	0.0148587	0.0106337	0.00700115	0.00699537	0.000685364	0.000116902	-6.33722e-06	-5.93272e-06	63		7.9407	37	-0.11735	-0.00111097	0.917982	0.0261812	771.109	5.87407	-0.0206668	-0.0100044	21.6357	0.272232	2.50447	3.32059	0.0598205	12.5185	25.8941	13.2713	13.2271	1.38545	0.412036	0.121615	-0.00280484
JP3	1.77968	1	0.00130933	-0.00123789	0.00406422	0.00443975	0.0333146	2.16053	9.35621e-05	-9.91124e-06	0.0146345	0.000353897	0.00146607	0.00135612	0.000347026	0.00377043	0.0158586	0.0143809	0.00848035	0.00919358	0.000635773	-2.92051e-05	-6.21104e-06	6.60749e-05	64		7.63124	37	-0.0446661	-0.000538629	0.924227	0.0240972	696.023	5.77654	0.132785	-0.00980517	19.8386	0.242211	2.18656	2.32865	0.15489	10.9155	27.6368	17.948	16.0218	1.82081	0.382223	-0.0303826	-0.00274899
JP3	1.84183	1	0.00172524	-0.0023461	0.00432537	0.00441391	0.0319481	2.15207	2.19011e-05	6.26317e-05	0.0119878	0.000393952	0.00184476	0.00173366	0.000241713	0.00381018	0.0182092	0.0150418	0.0103514	0.0125614	0.000678799	4.31344e-05	-6.27652e-06	3.04478e-05	65		7.89777	37	-0.0588542	-0.00102083	0.983614	0.0239569	667.473	5.75394	0.0310824	0.0619614	16.2508	0.269624	2.75136	2.97692	0.107885	11.0305	31.7331	18.7728	19.5568	2.48783	0.40809	0.0448734	-0.00277797
JP3	1.84279	1	0.00142714	-0.00226405	0.00514101	0.00417892	0.0281817	2.14478	0.000166531	2.62033e-05	0.0113248	0.000320027	0.00238012	0.00234181	0.000240752	0.00339705	0.018753	0.0208538	0.011904	0.0150097	0.000422845	6.78361e-06	-6.25156e-06	3.03267e-05	66		7.90186	37	-0.0486848	-0.000985128	1.1691	0.0226815	588.785	5.73445	0.236344	0.0259229	15.3519	0.219029	3.5498	4.0212	0.107456	9.83452	32.6807	26.0265	22.4899	2.97271	0.254212	0.0070571	-0.00276692
JP3	1.79791	1	0.00224522	0.000242873	0.00466604	0.0047176	0.0240101	2.05599	0.000129231	9.77146e-05	0.010222	0.000245539	0.00171403	0.001963	5.93409e-05	0.00415731	0.0191309	0.02276	0.0150344	0.0201583	0.000526815	6.7253e-06	-6.19782e-06	3.0066e-05	67		7.70944	37	-0.0765926	0.000105678	1.06109	0.0256053	501.63	5.49704	0.183407	0.0966689	13.857	0.168049	2.55637	3.37073	0.026486	12.0355	33.3392	28.4054	28.4043	3.99241	0.316718	0.00699644	-0.00274314
JP3	1.73642	1	0.000481293	-0.000264396	0.0048211	0.00469205	0.0219202	2.06824	2.18414e-05	2.62363e-05	0.0107225	0.000320429	0.00147749	0.00259833	0.000168605	0.00485068	0.02277	0.026291	0.0179417	0.0246745	0.000495827	-2.94326e-05	-6.25943e-06	0.000175264	68		7.44576	37	-0.0164186	-0.000115043	1.09635	0.0254666	457.967	5.52981	0.0309977	0.0259555	14.5354	0.219305	2.20359	4.46168	0.0752546	14.0428	39.6811	32.8123	33.8969	4.88685	0.298088	-0.0306193	-0.00277041
JP3	1.75517	1	0.00198688	-0.00216653	0.0056201	0.00459735	0.0192026	2.13268	-1.42027e-05	9.74465e-05	0.0104444	0.000209096	0.00192394	0.00270913	0.000166487	0.00443206	0.0229858	0.0281488	0.0219819	0.0308482	0.000561139	4.24767e-05	2.9589e-05	6.57533e-05	69		7.52617	37	-0.0677797	-0.000942696	1.27804	0.0249526	401.189	5.70209	-0.0201568	0.0964036	14.1584	0.143107	2.86945	4.65195	0.0743094	12.8309	40.0573	35.131	41.53	6.10958	0.337353	0.0441892	0.013096
JP3	1.79391	1	-0.000206513	-0.00182724	0.00436444	0.00459307	0.0164033	2.05717	-1.408e-05	6.11435e-05	0.00957325	0.000171828	0.00212008	0.00250806	0.000448734	0.00478382	0.0262003	0.0327079	0.0267691	0.037367	0.000343525	6.64887e-06	-6.12739e-06	-5.73628e-06	70		7.69226	37	0.00704489	-0.000795065	0.992499	0.0249294	342.705	5.5002	-0.0199825	0.0604892	12.9775	0.1176	3.16197	4.30668	0.200286	13.8492	45.659	40.821	50.5744	7.40064	0.206525	0.00691693	-0.00271197
JP3	1.89356	1	0.00119833	-0.00181217	0.00463056	0.006334	0.0149023	2.16712	0.000272727	0.000133594	0.010582	0.000281431	0.00175004	0.00325488	0.000382187	0.0050548	0.0285544	0.0412251	0.0336647	0.0505634	0.000455116	6.72586e-06	2.96729e-05	6.59398e-05	71		8.11955	37	-0.0408792	-0.000788507	1.05302	0.0343784	311.344	5.79418	0.387059	0.132164	14.3449	0.192614	2.61009	5.58908	0.170584	14.6337	49.7616	51.4508	63.6021	10.0142	0.273613	0.00699702	0.0131332
JP3	1.85687	1	0.000189235	0.000244707	0.00437567	0.00580236	0.0164635	2.12199	0.000130207	0.00020687	0.0104799	0.000175116	0.00212451	0.00327919	0.000276624	0.00545394	0.0297825	0.0470154	0.0385955	0.0638453	0.000494655	4.29153e-05	6.60337e-05	6.64323e-05	72		7.96226	37	-0.0064555	0.000106476	0.995054	0.0314929	343.962	5.6735	0.184793	0.204656	14.2066	0.119851	3.16858	5.63083	0.123467	15.7893	51.9017	58.6773	72.9177	12.6447	0.297383	0.0446455	0.0292264
JP3	1.77868	1	-0.00172455	0.00016732	0.0044658	0.00680336	0.0163972	2.04261	5.63307e-05	9.57363e-05	0.012513	0.000205426	0.00234702	0.00389156	0.000304134	0.00530346	0.0285731	0.0514762	0.0482984	0.0737934	0.000551291	4.17312e-05	0.000134496	9.97414e-05	73		7.62695	37	0.0588307	7.28039e-05	1.01555	0.0369259	342.577	5.46126	0.0799455	0.0947117	16.9626	0.140595	3.50045	6.68234	0.135746	15.3536	49.7942	64.2446	91.2494	14.615	0.331433	0.0434137	0.0595275
JP3	1.75529	1	-2.77741e-05	-0.00176778	0.00416687	0.00694974	0.0151339	1.99194	0.000161069	0.000200307	0.0119692	0.000414508	0.00244202	0.00391	0.000442811	0.00598111	0.0318917	0.0584728	0.0562922	0.0893306	0.00072391	6.56112e-06	2.89461e-05	0.00013431	74		7.52666	37	0.000947476	-0.000769193	0.947569	0.0377204	316.183	5.32579	0.228592	0.198163	16.2255	0.283693	3.64213	6.71401	0.197643	17.3154	55.5775	72.9766	106.352	17.6922	0.43521	0.00682564	0.0128115
JP3	1.77677	1	-0.0021734	0.00312025	0.00493395	0.00792538	0.0182106	2.0776	0.000300829	0.000130231	0.0127661	0.000274346	0.00237038	0.00499163	0.000582374	0.00524225	0.0317642	0.0663525	0.0631506	0.103047	0.00040869	6.55652e-06	-6.04229e-06	2.93115e-05	75		7.61875	37	0.0741425	0.00135767	1.12201	0.0430158	380.464	5.55481	0.426942	0.128837	17.3058	0.187765	3.53528	8.57131	0.259935	15.1764	55.3552	82.8109	119.309	20.4087	0.245702	0.00682086	-0.0026743
JP3	1.75551	1	0.00145201	0.00656162	0.00395046	0.00813453	0.0188355	2.1129	0.000380549	0.000277231	0.0134982	0.000496931	0.00228937	0.00418983	0.000418288	0.00556004	0.0359162	0.07284	0.0675638	0.120642	0.000670712	7.85114e-05	2.96892e-05	0.000137758	76		7.52763	37	-0.0495334	0.00285508	0.898357	0.044151	393.519	5.6492	0.540083	0.274264	18.2982	0.340104	3.41446	7.19451	0.186697	16.0964	62.591	90.9076	127.647	23.8934	0.403227	0.0816767	0.0131404
JP3	1.75958	1	-0.00189736	0.00584638	0.00393012	0.00854545	0.0177704	2.09441	0.000371834	0.000235813	0.0127328	9.97917e-05	0.00251748	0.00381332	0.00033857	0.00564347	0.0347065	0.075696	0.0735776	0.123491	0.00033973	6.57542e-06	9.9147e-05	0.000134603	77		7.54508	37	0.0647258	0.00254386	0.893731	0.0463813	371.266	5.59977	0.527713	0.233289	17.2606	0.0682983	3.75468	6.54799	0.151116	16.3379	60.4828	94.472	139.009	24.4577	0.204244	0.00684052	0.0438822
JP3	1.93979	1	0.0024438	0.0115911	0.0053063	0.00947935	0.0193951	2.30786	0.000561144	0.000412099	0.0123357	0.000608895	0.00337375	0.00506265	0.000294135	0.00633754	0.0418101	0.0863536	0.0853101	0.139261	0.000564394	0.000122485	0.000185494	0.000301198	78		8.31778	37	-0.083367	0.00504349	1.20668	0.0514502	405.21	6.17048	0.796387	0.407689	16.7223	0.416733	5.03175	8.69327	0.131283	18.3473	72.8622	107.773	161.175	27.581	0.33931	0.127424	0.0820992
JP3	1.87988	1	-0.00140645	0.0289314	0.00359102	0.00831157	0.0200853	2.18546	0.000503289	0.000396782	0.0144704	0.000586264	0.00343335	0.00457812	0.000468195	0.00654634	0.0368389	0.086465	0.0825499	0.132707	0.000469419	6.93723e-06	6.7604e-05	0.000142009	79		8.06091	37	0.0479792	0.0125886	0.816619	0.0451119	419.631	5.8432	0.714277	0.392536	19.6162	0.401244	5.12063	7.86126	0.208972	18.9518	64.1989	107.912	155.96	26.2829	0.282212	0.00721691	0.0299213
JP3	1.84879	1	0.000298111	0.0421938	0.00502245	0.00822001	0.0196014	2.08583	0.000780021	0.000206687	0.0137604	0.000499925	0.00324231	0.00522644	0.000204165	0.00476272	0.0344294	0.0813958	0.0785222	0.128964	0.000385895	4.28773e-05	6.59752e-05	0.000174695	80		7.92759	37	-0.0101697	0.0183592	1.14213	0.0446149	409.521	5.57684	1.10702	0.204475	18.6536	0.342153	4.83571	8.97451	0.0911262	13.7882	60	101.586	148.35	25.5417	0.231998	0.0446059	0.0292005
JP3	1.77502	1	-0.00087176	0.0464785	0.00477476	0.0077811	0.0170682	2.03778	0.000386201	0.000463468	0.0134801	0.000540735	0.00199555	0.00359642	0.000315228	0.00578867	0.0330502	0.0735914	0.073227	0.125256	0.000862792	7.96774e-05	6.6554e-05	0.00010338	81		7.61126	37	0.0297389	0.0202236	1.08581	0.0422327	356.595	5.44836	0.548104	0.458508	18.2736	0.370084	2.97625	6.17555	0.140698	16.7583	57.5963	91.8454	138.346	24.8072	0.518705	0.0828897	0.0294567
JP3	1.84093	1	-0.000501539	0.055413	0.00491964	0.00801257	0.0164324	2.09034	0.000491751	0.000496136	0.0135234	0.000428222	0.00270393	0.00458162	0.000565912	0.00520257	0.032838	0.0733299	0.0725677	0.116748	0.000386356	4.29285e-05	2.99037e-05	0.000102603	82		7.89389	37	0.0171093	0.0241112	1.11875	0.043489	343.313	5.5889	0.697902	0.490827	18.3324	0.293079	4.03275	7.86726	0.252587	15.0615	57.2266	91.519	137.101	23.1223	0.232275	0.0446592	0.0132353
JP3	1.74385	1	0.000216443	0.0615718	0.00492391	0.007715	0.0157511	2.07026	0.000748573	0.000510217	0.0144894	0.000271861	0.00193309	0.00425305	0.000299888	0.00613105	0.0289736	0.0627161	0.0593696	0.0978633	0.00043964	7.58e-05	2.86639e-05	9.83489e-05	83		7.47763	37	-0.00738365	0.026791	1.11973	0.041874	329.078	5.5352	1.06239	0.504757	19.6419	0.186064	2.88309	7.30306	0.133851	17.7495	50.4921	78.2725	112.166	19.3821	0.264309	0.078856	0.0126866
JP3	1.8565	1	7.70808e-05	0.0699815	0.00393244	0.00722073	0.0157393	2.00266	0.000577438	0.000512099	0.0126276	0.000203305	0.00148809	0.00343403	0.000300994	0.00514438	0.0273363	0.0575914	0.0552141	0.0897295	0.000336924	0.000215197	2.87696e-05	9.87118e-05	84		7.96066	37	-0.00262951	0.0304502	0.894259	0.0391912	328.832	5.35447	0.819511	0.506619	17.118	0.139144	2.2194	5.8967	0.134345	14.8931	47.6388	71.8767	104.315	17.7712	0.202557	0.223873	0.0127334
JP3	1.90383	1	7.26781e-06	0.0661533	0.00451275	0.00752637	0.0148486	2.15243	0.0008668	0.000730148	0.0140971	0.000593496	0.00189499	0.0032673	0.000163982	0.00517605	0.0283986	0.0536268	0.0517864	0.081411	0.000376537	0.000112301	2.91438e-05	0.000135227	85		8.16361	37	-0.000247931	0.0287844	1.02623	0.0408502	310.223	5.7549	1.23018	0.722334	19.1101	0.406194	2.82627	5.61041	0.0731912	14.9848	49.49	66.9286	97.8391	16.1237	0.226372	0.116828	0.012899
JP3	1.93336	1	-0.000559032	0.0655118	0.00440217	0.00815319	0.0161042	2.10832	0.000760321	0.000834982	0.0153514	0.000205737	0.00129472	0.00358069	0.000163813	0.00538188	0.0258982	0.0491126	0.0464967	0.0762375	0.000552126	4.17944e-05	2.91137e-05	2.95019e-05	86		8.29021	37	0.0190706	0.0285053	1.00108	0.0442523	336.456	5.63697	1.07906	0.826046	20.8104	0.140808	1.931	6.14854	0.0731158	15.5807	45.1327	61.2948	87.8454	15.0991	0.331934	0.0434794	0.0128857
JP3	1.89978	1	-0.000959005	0.0585513	0.0040509	0.00750072	0.012326	1.98964	0.000706823	0.0012599	0.0155825	0.000200544	0.00133065	0.00379907	0.000399827	0.00466248	0.0260703	0.0441836	0.0425998	0.0670463	0.00064111	4.07394e-05	0.0001313	9.7371e-05	87		8.14626	37	0.0327151	0.0254767	0.921199	0.0407109	257.521	5.31964	1.00314	1.24641	21.1237	0.137254	1.98459	6.52353	0.178457	13.498	45.4326	55.1431	80.483	13.2787	0.385431	0.0423819	0.0581129
JP3	1.80124	1	0.00187661	0.0460238	0.0043612	0.00708213	0.0136286	1.89042	0.000628494	0.0008353	0.018493	0.000298845	0.0015131	0.00320069	0.000326171	0.00587633	0.0253008	0.0432053	0.0401523	0.0643641	0.000462427	6.33462e-06	2.79469e-05	0.000197243	88		7.72371	37	-0.064018	0.0200258	0.991763	0.038439	284.735	5.05436	0.89197	0.826361	25.0692	0.204532	2.25671	5.49602	0.145582	17.0121	44.0915	53.9221	75.859	12.7475	0.278008	0.00659001	0.0123692
JP3	1.77997	1	0.000556486	0.0339694	0.00433681	0.00660686	0.014965	1.98138	0.000361847	0.000331861	0.0187145	0.00023362	0.00118717	0.00354027	0.000227096	0.00443328	0.0266182	0.0467985	0.0412107	0.0625849	0.000671877	6.39882e-06	6.23572e-05	0.00033575	89		7.63249	37	-0.0189837	0.0147807	0.986216	0.0358594	312.655	5.29757	0.51354	0.328309	25.3695	0.159891	1.77059	6.07913	0.101361	12.8344	46.3874	58.4067	77.8587	12.3951	0.403928	0.0066568	0.0275991
JP3	1.79664	1	0.00038527	0.0248523	0.00444465	0.00753832	0.0136114	1.96832	0.000328097	0.00063974	0.0199343	0.000370554	0.00108604	0.00392018	0.00029569	0.00566905	0.0253126	0.0448609	0.0402287	0.0626225	0.000467652	4.05725e-05	9.65953e-05	0.000233638	90		7.70398	37	-0.0131429	0.0108137	1.01074	0.040915	284.376	5.26264	0.465642	0.632893	27.023	0.253611	1.61976	6.73148	0.131977	16.412	44.1122	55.9884	76.0034	12.4026	0.281149	0.0422083	0.0427528
JP3	1.88014	1	0.0024615	0.0215788	0.00453262	0.00751332	0.0150341	2.11151	0.000404277	0.000582717	0.0197003	0.000308203	0.000933321	0.00267375	0.000336385	0.00546768	0.0249402	0.0467993	0.0450504	0.068233	0.000755649	-2.83096e-05	6.36646e-05	2.92063e-05	91		8.06202	37	-0.0839707	0.00938929	1.03074	0.0407793	314.1	5.64549	0.573757	0.576481	26.7058	0.210937	1.39199	4.59119	0.150141	15.829	43.4631	58.4076	85.1128	13.5137	0.454291	-0.029451	0.0281778
JP3	1.88966	1	0.000844738	0.0114051	0.00430336	0.00643659	0.0141299	2.10034	0.000367737	0.000406627	0.0167953	0.000133375	0.00106776	0.00332044	0.000369522	0.00572002	0.0245124	0.0449459	0.0441463	0.0673625	0.0005094	-2.81796e-05	2.86896e-05	2.90721e-05	92		8.10286	37	-0.0288171	0.00496254	0.978608	0.0349353	295.209	5.61564	0.521899	0.402276	22.7678	0.0912829	1.59251	5.70164	0.164931	16.5596	42.7176	56.0945	83.4048	13.3413	0.306248	-0.0293157	0.012698
JP3	1.85031	1	0.00267333	0.00626798	0.00362754	0.00741226	0.0161609	2.07711	0.000299904	0.000304133	0.0177896	0.000308362	0.00124755	0.00403469	0.000162256	0.00585396	0.0267358	0.0513442	0.0460894	0.0696678	0.000930342	-2.83242e-05	6.36975e-05	0.000133803	93		7.93413	37	-0.0911969	0.0027273	0.824923	0.0402308	337.641	5.55351	0.425629	0.300878	24.1157	0.211046	1.86064	6.92812	0.0724206	16.9473	46.5923	64.0798	87.0759	13.7979	0.559315	-0.0294662	0.0281923
JP3	1.90159	1	0.00103769	0.00457226	0.00431084	0.00736702	0.017008	2.05786	0.000233164	0.000308072	0.016711	6.51716e-05	0.00105183	0.00359258	0.000234981	0.00564729	0.0282509	0.0520802	0.0491709	0.0741505	0.000483334	0.000112557	6.45225e-05	2.95999e-05	94		8.15399	37	-0.0353994	0.00198947	0.980311	0.0399853	355.338	5.50206	0.33091	0.304775	22.6536	0.044604	1.56875	6.16895	0.104881	16.349	49.2327	64.9984	92.8978	14.6857	0.290577	0.117095	0.0285575
JP3	1.8574	1	-0.00211903	0.000283682	0.00470619	0.0073868	0.0159499	2.10484	0.000131353	0.000281605	0.0168876	0.000213114	0.00130468	0.00363616	0.000169687	0.00615852	0.0295691	0.0563355	0.0534413	0.0769578	0.000790664	4.32929e-05	-6.29958e-06	6.70168e-05	95		7.96452	37	0.0722876	0.000123435	1.07022	0.0400926	333.232	5.62766	0.186419	0.278591	22.8929	0.145857	1.94586	6.24379	0.0757373	17.829	51.5299	70.3093	100.966	15.2417	0.475342	0.0450383	-0.00278818
JP3	1.8156	1	0.00114842	-0.000223216	0.00439711	0.00682525	0.0161441	2.07952	0.000411187	0.000167419	0.0158833	-5.47207e-06	0.00130366	0.00346366	0.000271259	0.00566745	0.0294893	0.050912	0.0540857	0.0782939	0.000555937	4.20829e-05	2.93147e-05	0.000100582	96		7.78529	37	-0.0391768	-9.71253e-05	0.999929	0.0370448	337.29	5.55996	0.583565	0.165628	21.5315	-0.00374514	1.94433	5.94757	0.121073	16.4074	51.3909	63.5405	102.183	15.5063	0.334225	0.0437795	0.0129746
JP3	1.79858	1	-0.00142438	-0.00119003	0.00445134	0.00760261	0.0161054	2.06513	0.0001994	0.000239306	0.0152022	0.000136858	0.000953299	0.00362069	0.000414762	0.00469429	0.0289716	0.0589313	0.055031	0.0774108	0.000736235	-2.89156e-05	-6.14947e-06	6.54199e-05	97		7.7123	37	0.0485908	-0.000517803	1.01226	0.0412639	336.482	5.52148	0.282992	0.236745	20.6082	0.0936671	1.42179	6.21722	0.185123	13.5901	50.4887	73.5489	103.969	15.3314	0.44262	-0.0300814	-0.00272174
JP3	1.91511	1	-0.000220569	-0.00130435	0.00454789	0.00771182	0.0182038	2.28407	0.000212208	0.000141054	0.0145857	0.000107775	0.00127965	0.0030579	0.00032778	0.00632218	0.0306807	0.0616115	0.057842	0.0805576	0.000594154	7.10144e-06	-6.54447e-06	3.17476e-05	98		8.21199	37	0.00752442	-0.000567543	1.03422	0.0418567	380.322	6.10687	0.301169	0.139545	19.7725	0.0737621	1.90853	5.25083	0.1463	18.3028	53.467	76.8939	109.28	15.9547	0.357202	0.00738775	-0.00289657
JP3	1.88371	1	-0.000922475	-0.00227732	0.00492191	0.006123	0.0171072	2.17513	0.000355138	0.000137732	0.0126127	6.8254e-05	0.00150839	0.00350362	6.11839e-05	0.0055442	0.0302546	0.0615745	0.0561819	0.0814453	0.000580159	6.93417e-06	-6.39032e-06	3.09998e-05	99		8.07734	37	0.031469	-0.000990902	1.11927	0.0332332	357.41	5.81559	0.504019	0.136258	17.0979	0.0467137	2.24967	6.0162	0.0273086	16.0506	52.7245	76.8477	106.143	16.1305	0.348788	0.00721374	-0.00282834
JP3	1.93615	1	0.00150268	-0.000201471	0.00529885	0.00722251	0.0175453	2.12879	0.000175346	0.000179967	0.0119242	7.03063e-05	0.00151565	0.00330422	0.000253495	0.00456769	0.0318138	0.0653043	0.0571436	0.0834732	0.000597604	0.000121425	3.15118e-05	0.000146215	100		8.30219	37	-0.0512618	-8.76635e-05	1.20499	0.0392009	366.565	5.69169	0.248854	0.178041	16.1645	0.0481183	2.2605	5.67379	0.113144	13.2236	55.4418	81.5027	107.96	16.5321	0.359275	0.126321	0.013947
JP3	1.82815	1	-0.000102957	-0.000524673	0.00519956	0.00591153	0.0184686	2.02774	0.000131836	9.96842e-05	0.0117099	0.000140715	0.00149244	0.00313726	0.000206902	0.00493634	0.030889	0.0632799	0.0579806	0.0817232	0.000464251	4.34521e-05	3.02685e-05	0.000103855	101		7.83911	37	0.00351225	-0.000228294	1.18241	0.0320854	385.854	5.42151	0.187104	0.0986174	15.8739	0.0963065	2.22589	5.3871	0.0923479	14.2908	53.8301	78.9762	109.542	16.1855	0.279105	0.045204	0.0133968
JP3	1.88086	1	0.000898858	0.00310778	0.00528098	0.00662717	0.0201823	2.10302	0.000391297	0.000248156	0.0105912	0.000178824	0.00172664	0.00327483	0.000171769	0.0038711	0.0324865	0.0646764	0.0567691	0.0856846	0.000800367	6.9196e-06	-6.37689e-06	3.09347e-05	102		8.06509	37	-0.0306633	0.00135225	1.20093	0.0359696	421.657	5.62278	0.555336	0.2455	14.3574	0.122389	2.57519	5.62334	0.0766668	11.2069	56.614	80.7191	107.253	16.9701	0.481176	0.00719858	-0.0028224
JP3	1.85491	1	0.000771913	0.00322824	0.00557539	0.00609844	0.0201845	2.01324	0.000202705	0.000207095	0.0109985	0.000139127	0.00158413	0.00284861	0.000313103	0.00466358	0.031085	0.0676653	0.0604565	0.0833445	0.000603727	0.000151497	-6.25141e-06	6.65044e-05	103		7.95385	37	-0.0263327	0.00140466	1.26788	0.0330999	421.704	5.38275	0.287683	0.204878	14.9097	0.0952199	2.36264	4.89146	0.139749	13.5011	54.1716	84.4493	114.219	16.5066	0.362957	0.157605	-0.00276686
JP3	1.8219	1	-0.00294153	0.00221986	0.00479463	0.00588443	0.0228223	1.99852	0.000236103	0.000240441	0.0102977	6.59932e-05	0.00106509	0.00231449	0.000309458	0.0044305	0.0298982	0.0696867	0.059825	0.0893066	0.000310641	0.000149734	-6.17865e-06	0.000101488	104		7.81227	37	0.100346	0.000965898	1.09033	0.0319383	476.814	5.34339	0.335082	0.237868	13.9596	0.0451663	1.58852	3.9743	0.138122	12.8264	52.1035	86.9722	113.026	17.6874	0.186756	0.15577	-0.00273465
JP3	1.96031	1	0.0013822	0.0033859	0.00580973	0.00685237	0.022161	2.25543	0.000402331	0.000103373	0.0107377	0.000221812	0.00143383	0.00329129	0.000328394	0.00500516	0.0343163	0.0750975	0.0665027	0.0943899	0.000633211	0.000196841	3.13885e-05	0.000183588	105		8.40579	37	-0.047152	0.00147326	1.32117	0.0371919	462.998	6.0303	0.570996	0.102267	14.556	0.15181	2.13847	5.6516	0.146574	14.49	59.8028	93.725	125.642	18.6942	0.380682	0.204777	0.0138925
[truncated: 464 more rows]
[truncated: 1 more columns]
